# Supplementary material for: Comprehensive Comparison of Clinically Relevant Grain Proteins in Modern and Traditional Bread Wheat Cultivars
Source: Int J Mol Sci. 2020 May 13;21(10):3445. doi: 10.3390/ijms21103445 (PMC7279209; doi:10.3390/ijms21103445)
Supplement: Supplementary file 1 [file ijms-21-03445-s001.xlsx]

## Sheet: Cover page
Comprehensive Comparison of Clinically Relevant Grain Proteins in Modern and Traditional Bread Wheat Cultivars
Olha Lakhneko 1,2, Maksym Danchenko 1,3*, Bogdan Morgun 2, Andrej Kováč 4, Petra Majerová 4, and Ľudovit Škultéty 1,5
1	Biomedical Research Center, Slovak Academy of Sciences; Dubravska 9, 84505 Bratislava, Slovak Republic
2	Institute of Cell Biology and Genetic Engineering, National Academy of Sciences of Ukraine; Akademika Zabolotnoho 148, 03143 Kyiv, Ukraine
3	Plant Science and Biodiversity Center, Slovak Academy of Sciences; Dubravska 9, 84523 Bratislava, Slovak Republic
4	Institute of Neuroimmunology, Slovak Academy of Sciences; Dubravska 9, 84510 Bratislava, Slovak Republic
5	Institute of Microbiology, Czech Academy of Sciences; Videnska 1083, 14220 Prague, Czech Republic
Corresponding author
*telephone +421376943346, email maksym.danchenko@savba.sk, ORCID 0000-0002-3676-0728
Table of content
Figure S1. All analytical quality gels, stained by colloidal Coomassie and analyzed with SameSpots from the grain of three bread wheat cultivars.
Table S1. List of all 810 quantified gel spots.
Table S2. Protein and peptide identification details for specific gel spots.
Table S3. List of all 127 reliable protein hits directly quantified by mass spectrometry.
Table S4. Peptide identification details for direct liquid chromatography-mass spectrometry quantification.

## Sheet: Figure S1
Figure S1. All analytical quality gels, stained by colloidal Coomassie and analyzed with SameSpots from the grain of three bread wheat cultivars.

## Sheet: Table S1
Table S1. List of all 810 quantified gel spots.
#	Anova (p)	pI	MW, kDA	UniProt accession	PLGS score	Coverage, %/ Peptides	Normalised volume															Fold change			Tuckey´s HSD (p)
							Panna			Sotnytsia			Ukrainka			Mean			Standard deviation			Panna/ Sotnytsia	Panna/ Ukrainka	Sotnytsia/ Ukrainka	Panna/ Sotnytsia	Panna/ Ukrainka	Sotnytsia/ Ukrainka
							R1	R2	R3	R1	R2	R3	R1	R2	R3	Panna	Sotnytsia	Ukrainka	Panna	Sotnytsia	Ukrainka
3505	1.10614e-06	7.48	14.545	NA	NA	NA	1349.72	1817.74	1548.01	1701.03	1532.11	1488.78	8074.86	7805.44	7866.95	1571.82	1573.97	7915.75	234.915	112.146	141.182	-1.00137	-5.03604	-5.02916	0.899995	0.0010053	0.0010053
1061	3.11641e-06	4.85	60.261	NA	NA	NA	993.823	774.216	882.639	278.619	307.812	275.74	1117.87	1113.21	1009.92	883.56	287.39	1080.33	109.806	17.7445	61.0261	3.07442	-1.2227	-3.75911	0.0010053	0.0616811	0.0010053
1608	3.90589e-06	7.45	38.169	NA	NA	NA	8917.31	7143.59	7449.05	5858.91	6466.05	6102.72	27603.8	36218.1	29438.4	7836.65	6142.56	31086.8	948.255	305.521	4537.55	1.2758	-3.96684	-5.06088	0.0827987	0.0010053	0.0010053
2689	4.55109e-06	7.52	19.367	A0A3B5YPZ7	564	10/6	13320	13322	11875.7	2501.5	2178.52	1709	12976.5	16802	14052	12839.2	2129.67	14610.2	834.455	398.501	1972.88	6.02873	-1.13793	-6.86029	0.0010053	0.55477	0.0010053
2719	6.45617e-06	7.97	19.212	A0A3B5XV32	1557	27/27	7738.62	6850.68	8630.43	2814.97	2804.52	3299	10745.1	11867.4	12563.4	7739.91	2972.83	11725.3	889.874	282.519	917.407	2.60355	-1.51491	-3.94416	0.0010053	0.004469	0.0010053
1094	1.30363e-05	4.91	58.396	NA	NA	NA	6759.74	7236.27	8979.15	1762.26	1791.03	1812.2	5951.89	5951.95	7759.31	7658.39	1788.5	6554.38	1168.37	25.0666	1043.5	4.28202	1.16844	-3.66474	0.0010053	0.334374	0.0010053
2335	1.33083e-05	6.2	24.397	A0A1D6RH21	151	23/11	483.075	382.977	454.655	1905.34	2518.41	2591.24	533.62	548.548	426.5	440.236	2338.33	502.89	51.5831	376.743	66.5746	-5.31155	-1.14232	4.64979	0.0010053	0.539213	0.0010053
4186	1.53785e-05	7.36	16.408	NA	NA	NA	2738.78	2613.93	3166.11	17294.3	15829	23607.4	6815.81	5609.39	5443.48	2839.61	18910.2	5956.23	289.565	4133.35	749.028	-6.65946	-2.09755	3.17487	0.0010053	0.327158	0.0014969
4488	1.63036e-05	7.37	18.618	NA	NA	NA	11396.5	14349.8	12088.3	3337.93	3044.47	2403.11	1197.72	1276.74	1840.17	12611.5	2928.5	1438.21	1544.62	478.081	350.341	4.30648	8.76889	2.03621	0.0010053	0.0010053	0.0063753
1169	1.67318e-05	4.98	54.851	A0A1D6S518	943	50/30	542.178	461.718	451.215	855.992	747.539	894.26	1321.35	1479.57	1479.53	485.037	832.597	1426.82	49.7633	76.1067	91.3352	-1.71656	-2.94167	-1.7137	0.0010053	0.0010053	0.0010053
4491	2.72426e-05	7.17	35.213	A0A1D5T3T7	663	27/36	9498.13	9173.36	7152.29	5680.8	8493.92	7692.29	36768.9	33958.9	40331.9	8607.93	7289	37019.9	1271.04	1449.27	3193.89	1.18095	-4.30067	-5.07887	0.429423	0.0010053	0.0010053
390	2.90883e-05	5.7	120.136	P08489	559	40/66	4453.01	4435.33	7174.04	54758.4	63319	58721.4	6741.19	4731.95	3461.15	5354.13	58932.9	4978.1	1576.12	4284.25	1653.81	-11.007	1.07554	11.8384	0.0010053	0.899995	0.0010053
3445	3.13742e-05	7.47	15	NA	NA	NA	3374.26	3254.54	4166.4	5657.4	4909.63	6897.97	25482.4	19996.9	17728.3	3598.4	5821.67	21069.2	495.533	1004.29	3986.7	-1.61785	-5.85515	-3.6191	0.0276863	0.0010053	0.0010053
2645	3.23011e-05	7.14	19.638	A0A3B5YPZ7	179	13/5	6641.6	7951.44	7304.56	1434.01	2209.05	1824.84	6616.63	7771.57	6722.29	7299.2	1822.63	7036.83	654.938	387.525	638.495	4.00476	1.03728	-3.86081	0.0010053	0.899995	0.0010053
1025	3.2632e-05	7.19	62.407	A0A1D6A827	169	33/20	5902.52	8986.1	7317.74	10214.1	8110.61	8510.94	39788.2	63174.4	54349.4	7402.12	8945.22	52437.4	1543.52	1116.97	11809.7	-1.20847	-7.0841	-5.86205	0.472378	0.0010053	0.0010053
4482	5.30849e-05	7.13	21.005	A0A3B5YPZ7	796	22/11	12598.7	13314	13616.1	3378.49	2103.34	3637.77	13650.4	15230	14593.5	13176.3	3039.87	14491.3	522.523	821.353	794.711	4.33449	-1.0998	-4.76709	0.0010053	0.781346	0.0010053
2744	5.53016e-05	6.99	19.044	NA	NA	NA	2354.39	1477.42	2021.13	7281.01	10721.3	10833.7	1186.28	1217.89	1560.63	1950.98	9612.02	1321.6	442.675	2019.5	207.609	-4.92677	1.47623	7.27303	0.0010053	0.14458	0.0010053
1803	5.71712e-05	7	34.013	P21292	680	32/30	8120.88	7908.69	8565.05	1329.53	1561.9	1507.69	1376.71	2518.14	1607.77	8198.21	1466.37	1834.21	334.942	121.573	603.466	5.5908	4.46961	-1.25085	0.0010053	0.0010053	0.472941
1669	7.64323e-05	7.44	36.336	P04722	198	21/24	43238.6	40231.8	35464.1	49298.4	59632.2	47503	12984.9	15065.5	18307.9	39644.8	52144.5	15452.8	3920.36	6546.32	2682.56	-1.31529	2.56555	3.37444	0.105448	0.0010053	0.0010053
2161	8.53277e-05	7.49	27.272	Q94G92	843	9/6	5794.95	5199.54	6582.22	16299.5	25014.6	18381.7	5036.89	5920.08	4856.17	5858.9	19898.6	5271.05	693.553	4551.3	569.293	-3.3963	1.11153	3.77508	0.0010053	0.697128	0.0010053
1315	8.88328e-05	8.53	48.15	A0A1D5VMG1	227	15/8	3363.23	3115.49	2463.67	1140.19	821.731	840.475	2846.79	3072.35	2797.99	2980.8	934.132	2905.71	464.656	178.697	146.362	3.19098	1.02584	-3.1106	0.0010053	0.899995	0.0010053
4481	9.54695e-05	7.13	21.508	A0A3B5YPZ7	499	22/11	8407.66	9045.25	9267.65	2478.03	1693.32	2684.56	10687.9	7599.71	9316.51	8906.85	2285.3	9201.38	446.383	522.968	1547.33	3.89745	-1.03307	-4.02633	0.0010053	0.899995	0.0010053
4008	0.00012526	6.98	15.53	A0A3B6PFQ8	185	11/6	3988.15	5320.15	6689.76	20541.7	19018.5	26219.2	24822.4	19958.1	25212.9	5332.69	21926.5	23331.1	1350.85	3794.84	2927.66	-4.11172	-4.37512	-1.06406	0.0010053	0.0010053	0.899995
3866	0.000130728	8.41	42.94	I0IT62	316	44/22	6068.76	7502.24	4664.83	5015.29	3747.37	4292.02	18903.2	28140.1	20786.9	6078.61	4351.56	22610.1	1418.73	636.056	4880.89	1.39688	-3.71961	-5.19585	0.200675	0.0010053	0.0010053
3222	0.000139119	7.37	16.176	NA	NA	NA	1345.07	735.152	811.666	8590.26	6708.55	10119.5	2019.62	1563.53	2508.41	963.963	8472.78	2030.52	332.258	1708.53	472.532	-8.78953	-2.10643	4.17272	0.0010053	0.0267185	0.0012662
3607	0.00019764	6.45	13.165	Q43691	347	18/6	7670.36	5023.64	6165.1	2445.78	2217.14	2503.33	2589.86	2178.93	2220.91	6286.37	2388.75	2329.9	1327.52	151.378	226.106	2.63166	2.69813	1.02526	0.0010053	0.0010053	0.899995
4489	0.000215865	7.37	18.385	A0A3B6LGL1	245	15/3	3138.61	4183.07	3501.5	528.159	869.655	495.425	586.307	611.603	945.548	3607.73	631.08	714.486	530.273	207.259	200.505	5.71675	5.0494	-1.13216	0.0010053	0.0010053	0.783662
4055	0.000216584	7.29	51.866	A0A3B6MYZ0	279	33/19	14844.4	12004.1	12152.7	46060.2	90172.3	51545.5	11639.6	12102.4	9016.64	13000.4	62592.7	10919.6	1598.68	24041.6	1664.14	-4.81467	1.19056	5.73216	0.0010053	0.644907	0.0010053
4179	0.000216802	6.91	33.936	P21292	743	34/29	4136.31	4566.13	5710.82	1607.72	1667.31	1396.2	2111.69	1622.41	1442.97	4804.42	1557.08	1725.69	813.856	142.473	346.117	3.08553	2.78406	-1.10829	0.0010053	0.0010053	0.747452
3317	0.000287812	7.26	15.685	NA	NA	NA	1696.31	3189.25	1777.22	12693.6	11137.8	18309.9	2009.2	2971.14	2149.87	2220.93	14047.1	2376.74	839.565	3772.74	519.555	-6.32489	-1.07016	5.91024	0.0010053	0.899995	0.0010053
2950	0.000369773	7.33	17.61	NA	NA	NA	12025.6	13605.5	11609.3	1994.73	1574.01	1434.15	1180.97	1509.26	3182.12	12413.5	1667.63	1957.45	1053.11	291.779	1073.22	7.44377	6.34165	-1.17379	0.0010053	0.0010053	0.899995
1961	0.000373661	7.92	31.128	A1EHE7	6572	46/48	15764.7	17214.7	10973.5	20845.9	21610.9	17345.5	44288.8	67551.6	62586.6	14651	19934.1	58142.3	3266.27	2274.21	12251.6	-1.3606	-3.9685	-2.91673	0.203319	0.0010053	0.0016011
1656	0.000391231	8.3	36.694	M9TG60	1909	27/38	10469.4	10482.9	9478.55	9634.28	4267.95	8351.29	36607.3	46689.7	41026.8	10143.6	7417.84	41441.3	576.006	2802.3	5053.97	1.36746	-4.08545	-5.5867	0.272323	0.0014786	0.0010053
1082	0.000477789	5.67	59.328	A0A3B6KSH4	235	10/4	1465.54	1939.64	1779.17	625.389	831.553	540.524	1664.28	1482.56	1559.73	1728.12	665.822	1568.86	241.137	149.668	91.2071	2.59547	1.10151	-2.35627	0.0010053	0.748811	0.0011123
4175	0.000483696	6.89	63.526	NA	NA	NA	1308.64	1009.09	1142.71	1341.56	698.755	872.951	3622.45	4393.32	3383.5	1153.48	971.089	3799.76	150.066	332.451	527.742	1.18782	-3.29416	-3.91288	0.529735	0.0013708	0.0010053
4162	0.000524222	7.74	73.321	A0A3B6JER7	454	22/22	3621.54	2718.07	2221.34	600.07	585.861	725.747	792.57	489.148	371.741	2853.65	637.226	551.153	709.874	76.9898	217.158	4.47824	5.1776	1.15617	0.0013075	0.0010053	0.675566
1649	0.000609073	8.22	36.796	M9TG60	929	25/21	295.224	627.566	366.253	255.657	462.993	318.715	2053.74	1886.3	1729.81	429.681	345.788	1889.95	175.014	106.286	161.995	1.24261	-4.39849	-5.46562	0.689339	0.0015075	0.0010053
4171	0.000627654	7.83	72.948	A0A3B6JER7	369	21/41	8754.74	6192.51	5831.62	1925.92	2217.94	1768.58	2560.85	1495.43	1506.76	6926.29	1970.81	1854.35	1593.73	228.015	611.873	3.51443	3.73517	1.06281	0.0013229	0.0010053	0.874301
2839	0.000677553	7.54	18.269	NA	NA	NA	1694.26	2340.68	1930.58	926.976	636.596	556.298	470.747	673.223	469.238	1988.51	706.623	537.736	327.083	195.009	117.338	2.8141	3.69793	1.31407	0.0024041	0.0010053	0.355884
1066	0.000736593	8.52	60.075	P08488	217	6/5	1152.01	1152.58	1103.71	2618.65	2544.73	2061.08	725.933	1157	975.311	1136.1	2408.15	952.748	28.0471	302.84	216.417	-2.11967	1.19244	2.52759	0.0026678	0.347702	0.0010053
4114	0.000764631	5.02	48.539	P08488	237	20/6	907.135	559.696	604.498	1452.16	1603.82	1843.93	2193.25	1719.3	1930.45	690.443	1633.3	1947.67	188.993	197.544	237.44	-2.36558	-2.82089	-1.19247	0.0023148	0.0010053	0.495616
4169	0.00102089	7.03	20.452	A0A3B5YPZ7	598	12/10	9659.5	9239.68	12163.8	30184	35142.3	32766.6	6104.42	11957.8	11085.8	10354.3	32697.7	9716	1581.04	2479.86	3157.96	-3.15787	1.0657	3.36534	0.0021942	0.857366	0.001431
4403	0.00102799	6.78	36.694	P04722	104	20/9	2558.12	2483.71	1992.02	1880.44	2484.92	2912.65	938.682	1103.45	786.649	2344.62	2426	942.926	307.617	518.619	158.442	-1.03471	2.48654	2.57285	0.899995	0.0018813	0.0016411
4220	0.00159479	8.57	37.195	M9TG60	595	24/25	8141.85	9185.42	8270.18	12490.3	5150.51	8954	26266.7	33655.2	34083.1	8532.48	8864.95	31335	569.091	3670.73	4394.47	-1.03897	-3.67244	-3.53471	0.899995	0.0028239	0.0025712
4345	0.00164195	7.34	122.851	P10388	129	13/20	10310.2	13259.9	10254.5	2992.7	4939.77	5782.5	12967.3	14009.9	12965.9	11274.9	4571.65	13314.3	1719.29	1430.87	602.337	2.46626	-1.18089	-2.91237	0.0045833	0.614813	0.0019162
4351	0.0017095	7.58	120.814	P10388	104	4/2	9309.4	7091.83	7673.34	1088.91	2794.56	1933.7	8176.04	5822.42	8051.09	8024.86	1939.06	7349.85	1149.81	852.837	1324.27	4.13853	1.09184	-3.79042	0.0024629	0.899995	0.0034337
4126	0.00172966	9.05	24.673	B2Y2Q6	710	30/19	10352.4	9540.92	10011.3	8869.18	12106.5	6907.57	3382.59	3889.83	4656.3	9968.2	9294.43	3976.24	407.453	2625.44	641.237	1.07249	2.50694	2.33749	0.799738	0.0022657	0.0039627
969	0.00177245	6.44	65.205	A0A1D6D1Q3	368	29/19	1844.31	1406.15	1671.82	860.775	446.037	812.447	2297	2170.47	2101.75	1640.76	706.42	2189.74	220.725	226.789	99.0402	2.32264	-1.33459	-3.09977	0.007491	0.318311	0.0017358
4332	0.00201554	6.6	117.081	P10388	457	37/71	96163.6	113034	79906.9	26653.4	24790.3	44818.9	68197.8	65652.1	81963.9	96368.1	32087.5	71937.9	16564.5	11065	8775.55	3.00329	1.3396	-2.24193	0.0019625	0.322992	0.0085842
3497	0.00217062	7.18	14.63	NA	NA	NA	395.011	553.389	531.218	905.438	1181.59	1669.44	1233.21	1288.37	1250.73	493.206	1252.15	1257.44	85.759	386.858	28.1813	-2.53881	-2.54951	-1.00422	0.0040136	0.0033077	0.899995
3358	0.00228239	8.1	15.478	A0A3B6IN56	307	30/3	4198.69	4680.52	2840.94	11007.7	10607.4	12752.7	3938.67	6369.94	3936.24	3906.72	11455.9	4748.28	953.908	1140.7	1404.4	-2.93237	-1.21541	2.41265	0.0025664	0.589571	0.0066882
950	0.00257278	7.29	66.045	A0A3B5Z536	278	6/6	97.972	215.189	168.091	959.398	1060.25	598.651	164.499	301.52	296.005	160.417	872.766	254.008	58.984	242.687	77.566	-5.4406	-1.58342	3.43598	0.0024246	0.299611	0.0119055
4099	0.00259556	7.48	18.953	NA	NA	NA	1409.13	2870.48	2245.55	4185.37	5215.01	4163.08	1281.83	1086.64	1607.02	2175.05	4521.15	1325.16	733.22	600.997	262.884	-2.07864	1.64135	3.41177	0.02139	0.131611	0.0021779
4272	0.00267018	8.06	70.989	A0A3B6ILV9	2633	34/31	2262.47	3068.16	3099.68	5033.12	4790.99	7859.92	8571.23	8080.08	6386.98	2810.11	5894.68	7679.43	474.525	1706.25	1145.91	-2.09767	-2.73279	-1.30277	0.0125763	0.0025018	0.294281
1581	0.00283083	6.76	39.094	Q41593	438	14/7	601.852	786.847	594.55	274.437	432.943	347.901	1365.86	909.72	840.631	661.083	351.76	1038.74	108.976	79.3232	285.397	1.87936	-1.57127	-2.95297	0.0274142	0.110518	0.0023282
2078	0.00283306	7.06	28.702	Q94G92	490	16/4	817.261	1027.63	780.027	1447.46	2703.43	2669.17	495.197	673.229	779.765	874.974	2273.35	649.397	133.512	715.45	143.773	-2.5982	1.34736	3.50072	0.0114268	0.376569	0.0027766
986	0.00285964	8.81	64.459	NA	NA	NA	5604.57	6691.53	6721.82	2825.54	2138.94	1326.63	4399.9	5882.96	4604.82	6339.31	2097.04	4962.56	636.478	750.332	803.647	3.02298	1.27743	-2.36646	0.0029623	0.474201	0.0099048
4155	0.00298526	8.04	70.522	I6QQ39	1305	23/21	1995.59	2395.18	1407.76	7076.62	4541	6313.53	4428.82	3421.48	5285.35	1932.84	5977.05	4378.55	496.694	1300.87	932.952	-3.09236	-2.26534	1.36507	0.0028289	0.0133715	0.32471
1289	0.00481049	7.83	48.734	A0A3B6G0N3	271	13/6	2130.52	2201.39	1306.7	4828.78	4891.96	5119.16	2406.36	3055.12	1758.51	1879.54	4946.63	2406.67	497.357	152.712	648.305	-2.63183	-1.28046	2.05539	0.004713	0.442939	0.018317
4404	0.00491422	6.83	36.591	A0A1D5US94	187	21/16	662.749	629.394	796.338	1075.47	1239.28	1591.41	568.161	459.452	272.785	696.16	1302.05	433.466	88.3447	263.636	149.393	-1.87033	1.60603	3.00381	0.0574863	0.108142	0.00397
4045	0.00508122	8.33	64.925	P10388	79	3/8	2943.39	1993.19	2088.74	1005.08	609.309	1034.47	1655.9	2605.27	2184.69	2341.77	882.951	2148.62	523.2	237.436	475.715	2.65221	1.0899	-2.43345	0.0067445	0.899995	0.0105093
1051	0.00558942	7.73	60.914	I6QQ39	143	17/12	2187.9	1251.15	2084.77	762.574	567.755	747.601	1160.84	1657	1285.79	1841.28	692.644	1367.88	513.657	108.415	258.062	2.65833	1.34608	-1.97486	0.0051638	0.358134	0.025286
1084	0.00608707	6.43	59.235	A0A1D5YFA7	227	35/21	11901.2	19744.2	21120.3	29411.3	68586.7	36555.2	12926.5	8899.79	7152.04	17588.6	44851	9659.45	4973.28	20863.7	2961.24	-2.55001	1.82087	4.64323	0.0484389	0.178884	0.0050589
1896	0.0068492	7.24	32.072	A1EHE7	1347	25/14	4713.61	2828.83	4022.16	3639.73	7828.41	3796.99	1677.53	1487.19	1264.03	3854.86	5088.37	1476.25	953.462	2374.24	206.968	-1.31999	2.61126	3.44682	0.628609	0.0201878	0.0072957
714	0.00775948	4.77	78.394	NA	NA	NA	379.442	460.933	317.596	576.009	891.06	409.555	234	211.063	201.647	385.991	625.541	215.57	71.8924	244.544	16.6409	-1.62061	1.79056	2.9018	0.160021	0.0721159	0.0063477
2386	0.00834374	4.69	23.367	A0A1D5ZTV0	284	9/3	1297.21	1406.25	1747.02	2698.18	5137.44	2745.04	1229.41	866.173	1500.54	1483.5	3526.88	1198.71	234.642	1394.98	318.295	-2.37742	1.23758	2.94224	0.025926	0.598459	0.008595
1087	0.0111829	6.32	59.049				19464.9	26178.3	29743.9	7018.63	10108.8	16257.7	10579.1	6250.54	8126.22	25129	11128.4	8318.61	5219.25	4703.17	2170.66	2.25811	3.02082	1.33777
975	0.0160049	6.8	65.019				260.178	204.697	463.034	348.486	194.051	194.179	542.822	1310.59	888.429	309.303	245.572	913.948	135.994	89.126	384.522	1.25952	-2.95486	-3.72171
1530	0.0168863	8.14	40.7				11587.6	12777.1	13079.6	17186.6	29041	12638.6	7340.54	9005.72	6136.41	12481.4	19622	7494.22	788.715	8468.08	1440.82	-1.5721	1.66547	2.61829
2413	0.0170307	9.07	22.94				9353.78	4768.58	6390.8	31073.8	29389.5	16737.3	4596.6	10375.9	12597	6837.72	25733.5	9189.85	2325.04	7836.35	4129.99	-3.76347	-1.34399	2.80021
518	0.0190639	8.84	105.882				39244.9	68030.9	128192	25221.9	21674.2	31256.5	84508.4	69955	73154.2	78489.3	26050.9	75872.5	45386.4	4844.63	7648.04	3.01292	1.03449	-2.91247
1793	0.0204688	8.29	34.345				14562.6	10910.5	8071.12	1688.67	3834.07	852.992	8504.74	3415.39	3398.8	11181.4	2125.25	5106.31	3254.21	1537.74	2943.14	5.26124	2.18973	-2.40269
4095	0.0204778	6	45.277				13133.7	12744.2	15032.6	3407.03	1230.08	5848.37	6345.6	3820.25	4387.76	13636.8	3495.16	4851.2	1224.34	2310.41	1324.92	3.90163	2.81102	-1.38798
511	0.020558	8.62	106.9				4448.63	12746.9	22545.6	3515.33	1867.06	1487.98	15479.9	11914.7	7482.15	13247	2290.12	11625.6	9058.82	1077.86	4006.72	5.78442	1.13947	-5.0764
2146	0.0205755	8.6	27.553				1882.4	1519.31	2179.78	1691.87	1052.16	1725.78	3836.27	5727.77	2496.59	1860.5	1489.93	4020.21	330.78	379.505	1623.42	1.24871	-2.16083	-2.69825
1155	0.0346064	7.09	55.504				1825.01	1624.42	1575.76	1951.46	7605.87	3489.48	690.717	1337.69	1228.5	1675.06	4348.94	1085.64	132.115	2923.54	346.341	-2.59628	1.54293	4.00588
4066	0.0355457	8.4	32.123				4649.48	14852.9	11674.5	29752.5	34280.4	24792.8	17464.4	22199.8	12516.7	10392.3	29608.5	17393.6	5221.17	4745.43	4841.91	-2.84908	-1.6737	1.70227
3754	0.0587417	4.53	21.432				1505.78	1253.37	1866.6	1282.37	3605.84	1500.83	788.817	547.848	1003.47	1541.92	2129.68	780.043	308.209	1283.05	227.935	-1.38119	1.97671	2.73021
4432	0.0677572	9.36	32.328				18394	18158.7	14254.6	72436	72285.7	24934.1	13031.7	30227.2	32939	16935.8	56551.9	25399.3	2324.96	27381.9	10796.1	-3.3392	-1.49974	2.22652
3928	0.0694861	7.15	119.457				4756.29	2557.98	2343.85	511.037	956.29	2084.41	2965.59	1778.29	3200.56	3219.37	1183.91	2648.15	1335.31	811.009	762.426	2.71926	1.21571	-2.23677
4377	0.269336	9.53	30.03				18217	38208.1	39067.9	14908.1	17436.2	5834.26	1061.3	6115.73	34261.4	31831	12726.2	13812.8	11797.9	6100.98	17888.4	2.50122	2.30445	-1.08538
4446	0.272658	9.29	30.515				40135.9	12945.1	13598.8	80591.2	53714.2	43110.5	8521.25	72620.4	35463.8	22226.6	59138.6	38868.5	15513.3	19320.2	32184.9	-2.66071	-1.74874	1.52151
1363	4.10829e-05	7.2	46.592				971.843	989.606	907.416	2420.36	2394.39	2252.06	2401.27	2248.04	1801.75	956.288	2355.6	2150.35	43.2466	90.608	311.471	-2.46328	-2.24865	1.09545
1028	4.56218e-05	5.17	62.127				13719.8	15739.3	14352	21308.3	22849.4	26347.8	10777.7	10598.8	9969.2	14603.7	23501.8	10448.6	1032.98	2582.3	424.66	-1.60931	1.39767	2.24929
1124	5.76793e-05	7.96	56.903				37064.5	40307.9	34703.4	56397.2	63754.9	62433.7	35458.3	34296	32651.1	37358.6	60861.9	34135.1	2813.83	3922.6	1410.5	-1.62913	1.09443	1.78297
1439	8.99287e-05	7.67	44.206				18919.6	15548.6	14397.3	10381.8	11236.7	9891.35	23788.1	26087.7	24687.8	16288.5	10503.3	24854.5	2350.2	680.829	1158.85	1.5508	-1.5259	-2.36636
4133	0.000138165	6.26	36.77				2965.94	2609.73	2727.73	4994.04	6062.85	6397.02	3109.57	2616.2	2812.51	2767.8	5817.97	2846.1	181.456	732.846	248.391	-2.10202	-1.02829	2.04419
1019	0.000145345	5.11	62.593				6475.89	6658.41	6374.1	8110.47	9308.87	9382.19	5037.16	5337.67	4515.6	6502.8	8933.84	4963.48	144.052	714	415.957	-1.37385	1.31013	1.79992
4176	0.000162716	7.24	36.974				4204.56	4559.41	4465.24	6597.02	7157.06	7806.01	6075.45	5636.54	5966.46	4409.74	7186.7	5892.82	183.822	605.042	228.534	-1.62973	-1.33632	1.21957
4158	0.000261046	7.43	48.199				5214.44	6260.09	6430.31	13237.5	11878.8	15331.3	6241.54	4959.37	6225.8	5968.28	13482.5	5808.9	658.368	1739.26	735.761	-2.25903	1.02744	2.32101
1660	0.00027441	7.12	36.591				4710.72	4494.62	3904.41	3647.69	4425.2	4333.81	7892.92	7348.87	7265.87	4369.92	4135.57	7502.55	417.372	424.976	340.608	1.05667	-1.71686	-1.81415
2141	0.000405538	5.63	27.604				3954.71	4060.66	4198.89	4805.81	5270.53	5015.15	5693.38	5506.02	6282.32	4071.42	5030.5	5827.24	122.446	232.742	405.091	-1.23556	-1.43126	-1.15838
858	0.000415334	7.25	69.683				460.62	424.211	441.421	1098.78	954.69	822.362	602.055	690.01	549.044	442.084	958.612	613.703	18.2134	138.252	71.2011	-2.16839	-1.3882	1.56201
649	0.000447757	7.25	87.217				1122.91	1221.88	1021.61	2108.77	2613.92	1788.1	945.36	909.818	793.938	1122.13	2170.26	883.039	100.139	416.332	79.1834	-1.93405	1.27076	2.45772
1824	0.000572646	7.3	33.553				65294.8	63526.9	66127.4	24369.6	32405.9	31192.8	38304.3	48628.4	37970.1	64983	29322.8	41634.3	1327.99	4332.23	6059.43	2.21613	1.56081	-1.41986
2432	0.000641617	7.16	22.487				3139.71	2638.44	3073.91	4303.41	4254.52	4815.22	5451.28	5361.83	4562.3	2950.68	4457.72	5125.13	272.41	310.573	489.481	-1.51074	-1.73693	-1.14972
1836	0.000667368	5.51	33.349				1089.66	1183.97	1100.52	915.434	941.528	1094.81	1461.69	1524.78	1433.84	1124.72	983.925	1473.44	51.6016	96.9147	46.5961	1.14309	-1.31005	-1.49751
4129	0.000732528	5.26	61.287				43102.6	45498.6	47106.9	58535.3	52589.2	60054.8	31164.2	38607.8	32242.8	45236	57059.8	34004.9	2015.03	3945.47	4022.52	-1.26138	1.33028	1.67798
1693	0.000812164	7.6	36.03				11489.5	15223.2	11944.1	11705.9	17421.8	15758.8	28988.8	34542.8	31893.8	12885.6	14962.2	31808.5	2037.17	2940.02	2777.96	-1.16116	-2.46853	-2.12593
2019	0.00111089	7.44	29.826				11309	12276.6	13926.9	6990.38	8895.67	7504.67	5063.24	6813.27	5015.75	12504.2	7796.9	5630.75	1323.69	985.69	1024.37	1.60374	2.2207	1.3847
1434	0.0011299	7.54	44.498				13282.6	11824.8	9378.29	4858.08	6063.78	4358.87	9598.97	10033.7	8874.98	11495.2	5093.58	9502.54	1972.92	876.516	585.33	2.25681	1.2097	-1.86559
973	0.0012902	8.53	65.112				1175.26	1153.01	1008.36	1692.9	1775.35	1538.19	766.637	1028.9	944.353	1112.21	1668.81	913.295	90.6242	120.404	133.86	-1.50045	1.2178	1.82724
2043	0.0013713	5.05	29.391				1194.5	1206.58	1260.22	1358.63	1421.27	1418.78	1545.37	1705.99	1868.37	1220.43	1399.56	1706.58	34.98	35.4702	161.505	-1.14677	-1.39834	-1.21937
1228	0.00143831	6.74	51.586				1843.97	1573.8	1822.45	2775.19	2725.62	3610.12	1533.47	1019.13	1271.37	1746.74	3036.98	1274.66	150.161	496.976	257.186	-1.73866	1.37036	2.38259
653	0.0015828	7.38	86.878				818.058	898.922	712.221	873.228	1179.43	1087.52	585.467	501.834	488.255	809.734	1046.73	525.186	93.6282	157.125	52.6452	-1.29268	1.5418	1.99306
3575	0.00167828	8.22	13.687				4940.68	7628.48	5691.49	5836.64	7197.47	6266.25	11763.1	12023.5	13040.7	6086.88	6433.45	12275.8	1386.84	695.656	675.163	-1.05694	-2.01676	-1.90812
991	0.00167918	7.54	63.993				1529.92	1082.31	1350.37	994.223	1178.58	1179.91	2456.51	2077.64	2963.8	1320.87	1117.57	2499.32	225.258	106.825	444.63	1.18191	-1.89218	-2.23638
4484	0.00168713	6.93	21.08				23829.4	22428.7	24448.2	26797.9	31296.5	30826	20057.5	17575.2	20966.3	23568.8	29640.1	19533	1034.66	2472.68	1755.34	-1.2576	1.20661	1.51744
762	0.00183061	8.1	74.067				1388.59	1597.48	1257.34	782.055	1069.37	1020.15	1922.06	1979.02	1717.08	1414.47	957.19	1872.72	171.539	153.655	137.763	1.47773	-1.32397	-1.95648
4166	0.00194471	7.55	31.306				49952.5	33577.6	43353.6	46277.4	62221.6	39627.3	20004.1	21144	18909.9	42294.5	49375.4	20019.3	8238.66	11611.4	1117.13	-1.16742	2.11269	2.46639
2328	0.00203765	7.84	24.523				905.692	1132.98	926.917	1631.21	1455.83	1394.83	1738.23	1772.72	1463.17	988.528	1493.96	1658.04	125.545	122.714	169.64	-1.51129	-1.67728	-1.10983
1867	0.00213927	7.46	32.762				13393.3	13686.5	13568.4	9625.44	7344.18	7533.7	17612.8	12711.9	15797.5	13549.4	8167.77	15374.1	147.561	1265.93	2477.71	1.65888	-1.13467	-1.88228
4007	0.00245428	6.84	15.129				8989.79	7344.6	10436.7	14573.6	14896.5	13863.7	16507	13658.8	15376.6	8923.7	14444.6	15180.8	1547.12	528.36	1434.15	-1.61868	-1.70118	-1.05097
1677	0.00246506	4.99	36.183				646.121	572.227	537.343	1049.23	1446.02	961.091	942.146	947.147	935.834	585.23	1152.11	941.709	55.5427	258.315	5.66927	-1.96865	-1.60913	1.22343
1223	0.00255184	6.62	51.679				4738.88	3827.45	4978.59	6550.55	6694.19	7868.5	4659.17	4041.07	4227.53	4514.97	7037.74	4309.26	607.358	723.031	317.052	-1.55876	1.04774	1.63317
4183	0.00257751	8	52.705				19212.6	17689.8	12260.7	32663.9	31194.6	30497.5	17433.4	17990.9	19148.7	16387.7	31452	18191	3654.3	1105.91	874.973	-1.91924	-1.11004	1.72899
1846	0.00302314	5.77	33.145				2157.51	2447.68	2522.75	1985.99	1842.4	2409.01	4570.67	3405.05	3527.7	2375.98	2079.13	3834.47	192.888	294.564	640.513	1.14278	-1.61385	-1.84426
4132	0.00306433	7.49	23.794				4772.6	5256.97	5034.3	1772.81	2196	2678.3	2741.89	2646.92	1738.55	5021.29	2215.71	2375.79	242.445	453.068	553.903	2.26623	2.11353	-1.07225
1368	0.00324067	6.56	46.446				701.428	696.703	800.768	536.861	515.499	394.583	760.885	971.43	952.277	732.966	482.314	894.864	58.7657	76.7246	116.424	1.51969	-1.22088	-1.85535
4325	0.0032434	5.33	119.796				1382.11	1733.56	1364.24	1385.57	1745.5	1903.28	980.579	659.375	710.039	1493.31	1678.12	783.331	208.261	265.355	172.69	-1.12376	1.90635	2.14228
1507	0.00329973	5.46	41.577				573.942	551.693	569.172	808.093	793.769	818.29	600.015	607.913	752.888	564.936	806.717	653.605	11.714	12.3183	86.0721	-1.42798	-1.15696	1.23426
4222	0.00346522	7.6	34.702				18248.2	19962.7	13973.3	18099.5	25131.8	21359.2	31344.3	36182.4	37629.6	17394.8	21530.1	35052.1	3084.55	3519.28	3291.6	-1.23774	-2.0151	-1.62805
2918	0.00348876	8.03	17.842				24690.5	24816.4	20747.8	31615.1	31822.9	38268	22675.1	24124.6	21071.3	23418.2	33902	22623.7	2313.54	3782.46	1527.34	-1.44768	1.03512	1.49852
786	0.0035791	4.93	72.948				2259.03	2633.1	3149.28	1066.93	1505.56	964.201	2366.35	1892.35	2508.37	2680.47	1178.89	2255.69	447.012	287.522	322.575	2.27372	1.18832	-1.91339
4301	0.00362494	8.44	45.131				17110.1	15495.8	13331.5	20731	19332.9	15697.9	5488.29	10060.6	7156.17	15312.4	18587.3	7568.34	1895.97	2598.09	2313.83	-1.21387	2.02322	2.45593
1469	0.00369312	7.78	42.891				9443.41	8917.69	7147.54	7527.26	8054.53	8131.82	12477.7	13758.2	11279.3	8502.88	7904.54	12505	1202.83	329.008	1239.67	1.0757	-1.47068	-1.58201
1444	0.00374401	8.14	43.963				2190.47	2629.37	2502.53	1146.16	1202.45	704.991	1727.13	1663.35	1371.56	2440.79	1017.87	1587.35	225.866	272.415	189.579	2.39795	1.53766	-1.55948
2271	0.00376855	8.86	25.306				4256.35	6597.07	6056.19	3881.09	4080.63	3932.23	3079.02	2178.96	2298.77	5636.54	3964.65	2518.92	1225.49	103.648	488.749	1.4217	2.23768	1.57395
2289	0.00404134	7.2	25.128				1817.12	2323.98	1861.1	715.411	880.337	1325.29	2286.71	2510.13	2035.08	2000.73	973.678	2277.3	280.8	315.47	237.668	2.05482	-1.13824	-2.33887
1748	0.00429019	6.07	35.111				1966.54	2126.98	1926.17	2507.58	2405.54	3408.07	4034.77	3217.37	4145.21	2006.56	2773.73	3799.12	106.222	551.718	506.823	-1.38233	-1.89334	-1.36968
4290	0.00435711	4.6	19.884				1563.43	1028.71	1042.91	683.08	564.258	527.365	1014.52	1337.36	1347.51	1211.68	591.568	1233.13	304.706	81.3701	189.386	2.04826	-1.0177	-2.08451
4463	0.00453687	8.09	68.563				6151.35	6986.99	4899.69	10506.1	6510.73	11125.5	14774.1	14067.2	14964.6	6012.68	9380.77	14602	1050.53	2504.74	472.812	-1.56017	-2.42853	-1.55659
4120	0.00464664	7.35	15.323				1936.18	1499.2	1965.14	3526.17	2427.12	4053.73	4154.19	3937.66	3567.73	1800.17	3335.67	3886.53	261.056	829.869	296.552	-1.85297	-2.15897	-1.16514
4112	0.00501829	6.94	45.082				3115.95	2970.12	3834.96	1981.05	1357.63	1467.99	2646.1	3824.64	2739.06	3307.01	1602.22	3069.93	462.993	332.683	655.245	2.06401	1.07723	-1.91605
1343	0.00557787	7.11	47.176				6567.84	6040.23	5306.27	3641.79	3385.38	4850.17	6669	6384.01	6524.51	5971.45	3959.11	6525.84	633.588	782.254	142.498	1.50828	-1.09284	-1.64831
998	0.00566602	6.83	63.713				424.921	608.822	572.898	581.665	374.952	562.619	1337.96	1265.25	901.298	535.547	506.412	1168.17	97.4742	114.245	233.96	1.05753	-2.18127	-2.30676
1304	0.00568717	7.09	48.442				12173.2	10479.5	10014.1	7699.78	9195.93	9737.48	7449.97	6640.42	7269.72	10888.9	8877.73	7120.04	1136.28	1055.46	425.03	1.22654	1.52933	1.24687
3971	0.00570838	6.04	16.072				5057.23	4519.11	7454.12	9404.81	9504.87	11709.7	11213.4	10722	10120.9	5676.82	10206.5	10685.4	1562.53	1302.82	547.179	-1.79792	-1.8823	-1.04693
1739	0.00590892	6.65	35.264				2098.84	2298.77	2173.3	2305.76	2149.83	2494.31	3065.05	2849.08	2652.38	2190.3	2316.63	2855.5	101.045	172.499	206.412	-1.05768	-1.3037	-1.23261
4088	0.00591548	7.88	70.336				15567.5	13143.2	10923.4	19103.2	18500.1	20842.5	20385.5	19720.8	19134.6	13211.3	19481.9	19747	2322.81	1216.24	625.855	-1.47464	-1.4947	-1.0136
4061	0.00634203	7.79	12.896				116066	150088	128324	144036	134217	154974	101212	92078.3	103925	131493	144409	99071.9	17230.6	10383.5	6206.56	-1.09823	1.32724	1.45762
1925	0.00637807	5.75	31.74				1061.14	990.215	891.765	1336.29	1232.23	1277.24	1309.68	1139.35	1225.8	981.04	1281.92	1224.95	85.06	52.1882	85.1685	-1.30669	-1.24862	1.04651
646	0.00647082	5.04	87.557				306.167	462.606	572.711	752.693	884.149	695.215	363.644	343.704	330.142	447.161	777.352	345.83	133.941	96.8509	16.852	-1.73842	1.29301	2.24779
4106	0.00669963	7.94	23.09				10211.7	9340.79	7116.14	11568.3	10722.2	9711.59	16380.8	23318.2	15183	8889.54	10667.4	18294	1596.35	929.556	4392.12	-1.19999	-2.05793	-1.71495
2381	0.00710866	6.26	23.492				11187.1	12490	13842.8	10685.1	12134.8	10895.8	16904.9	14649	15656.7	12506.6	11238.6	15736.9	1327.96	783.298	1130.1	1.11283	-1.25828	-1.40026
1201	0.00814325	4.71	53.358				1883.62	1968.47	2035.61	3675.94	6196.97	3156.36	1716.44	2241.34	1870.71	1962.57	4343.09	1942.83	76.1681	1626.39	269.78	-2.21296	1.01016	2.23545
1329	0.00857032	4.7	47.517				1388.96	1239.37	1219.19	1821.09	1562.53	1755.88	1334.33	1477.48	1255.74	1282.51	1713.16	1355.85	92.7418	134.469	112.427	-1.33579	-1.05719	1.26354
1956	0.00874271	7.14	31.255				12594.3	11662	9349.97	13265	15048.1	16485.8	17048.1	16534.8	17282	11202.1	14933	16955	1670.36	1613.48	382.232	-1.33305	-1.51355	-1.13541
1163	0.00910959	7.94	55.037				7557.51	6906.02	4578.01	11432.3	11201.6	10370.7	4568.99	5208.81	6689.35	6347.18	11001.5	5489.05	1566.39	558.387	1087.6	-1.7333	1.15633	2.00427
1077	0.00939574	5.73	59.515				4943.86	3104.03	5180.22	1582.48	1709.6	2280.29	2915.36	2114.07	2787.3	4409.37	1857.46	2605.58	1136.61	371.663	430.443	2.37387	1.69228	-1.40277
1691	0.00950549	5.9	36.055				332.528	488.951	485.724	423.223	362.424	526.106	784.388	705.275	812.309	435.734	437.251	767.324	89.3939	82.7378	55.5199	-1.00348	-1.76099	-1.75488
4152	0.00970789	5.72	50.187				2184.99	1573.84	1738.24	3070.6	3388.27	4153.24	3764.11	2908.73	5196.84	1832.36	3537.37	3956.56	316.257	556.508	1156.13	-1.9305	-2.15927	-1.1185
1263	0.00985815	6.43	49.708				680.044	553.152	732.95	1119.85	890.219	1200.11	681.488	520.101	689.515	655.382	1070.06	630.368	92.4013	160.834	95.5781	-1.63273	1.03968	1.69751
2226	0.00987809	7.73	26.047				797.828	839.365	835.561	1371.1	1082.46	1221.27	1088.35	1631.9	1432.68	824.251	1224.94	1384.31	22.9623	144.354	274.986	-1.48613	-1.67948	-1.1301
4157	0.0100448	8.42	70.149				6468.15	5362.67	4794.65	3537.99	2662.08	3489.86	6697.14	5216.32	4747.78	5541.82	3229.98	5553.75	851.017	492.4	1017.54	1.71575	-1.00215	-1.71944
742	0.0104818	4.77	74.627				2000.9	1515.54	2418.27	4109.19	3252.36	2279.96	1505.78	1254.81	1216.07	1978.24	3213.84	1325.55	451.793	915.228	157.281	-1.62459	1.49239	2.42453
1340	0.0106621	4.64	47.225				3210.79	2529	2449.05	4204.58	4215.78	3611.4	3151.15	2904.56	3253.88	2729.61	4010.59	3103.2	418.623	345.748	179.527	-1.46929	-1.13686	1.29241
1153	0.0107999	6.1	55.504				4300.33	4450.45	5368.77	3560.49	4123.29	5044.45	8175.25	6055.1	7512.48	4706.52	4242.74	7247.61	578.417	749.153	1084.61	1.10931	-1.53991	-1.70824
1048	0.0115267	4.76	60.914				1082.05	1199.86	1160.67	2523.36	3916.94	1896.97	1169.5	1644	1111.64	1147.53	2779.09	1308.38	59.9991	1033.98	292.091	-2.42181	-1.14017	2.12407
2989	0.0117602	5.84	17.403				4457.21	4644.26	3723.82	5233.5	7001.4	6011.45	5780.13	6691.6	6867.91	4275.1	6082.12	6446.55	486.492	886.067	583.827	-1.42269	-1.50793	-1.05992
4090	0.0120583	7.56	45.277				16426.9	12176.1	9028.15	5148.15	6155.05	6797.69	7806.66	8520.58	8616.87	12543.7	6033.63	8314.7	3713.07	831.449	442.605	2.07897	1.50862	-1.37806
4067	0.0121612	6.66	31.255				4458.87	3881.8	3830.17	5224.04	5271.13	6196.64	5225.88	4818.53	5847.12	4056.95	5563.94	5297.18	349.031	548.442	517.985	-1.37146	-1.30571	1.05036
1975	0.0124254	4.14	30.872				2100.76	1350.33	1635.14	2345.32	2018.36	2051.96	2968.07	3518.04	2597.33	1695.41	2138.55	3027.81	378.829	179.857	463.253	-1.26137	-1.78589	-1.41583
3152	0.0126638	8.04	16.537				7554.88	9646.31	6673.01	12010.4	12308.2	10785.6	13786.5	14888.1	10962.9	7958.07	11701.4	13212.5	1527.1	806.93	2024.6	-1.47038	-1.66027	-1.12914
928	0.0127517	5.92	66.884				370.798	324.742	458.001	544.786	493.961	544.534	811.302	568.771	611.066	384.514	527.76	663.713	67.6803	29.2712	129.553	-1.37254	-1.72611	-1.2576
3221	0.0128719	6.56	16.176				1911.76	1096.51	2267	958.669	1056.11	939.432	2786.95	2080.3	2165.98	1758.43	984.737	2344.41	600.121	62.5547	385.638	1.78568	-1.33324	-2.38075
4075	0.0136398	5.53	56.623				13363	11232	13299.5	12671.1	14514.9	16447.5	18836	16673.5	19301.2	12631.5	14544.5	18270.2	1212.41	1888.38	1402.25	-1.15145	-1.4464	-1.25616
3894	0.0138074	8.69	91.968				9653.75	14082.7	9537.21	6756.81	6845.7	4920.17	9822.41	16178.8	14862.1	11091.2	6174.23	13621.1	2591.34	1086.96	3354.97	1.79637	-1.2281	-2.20612
4115	0.0144924	8.14	51.213				16008	14441	10670.9	22031.8	20159	25023.2	18526	16178.6	17513.9	13706.6	22404.7	17406.2	2743.32	2453.43	1177.4	-1.63458	-1.26991	1.28717
4271	0.0145197	7.96	70.802				3677.66	5551.15	3079.18	5166.79	3696.57	6379.17	11203.5	9428.21	7984.12	4102.66	5080.84	9538.61	1289.62	1343.36	1612.53	-1.23843	-2.32498	-1.87737
889	0.0152173	7.08	68.47				718.454	1523.91	858.744	592.997	788.161	952.824	2200.4	1762.05	1831.76	1033.7	777.994	1931.4	430.286	180.129	235.55	1.32868	-1.86843	-2.48254
4483	0.0158053	6.92	21.558				30870.6	31761.3	31488.3	26952	34545.5	36767.1	25216.7	17676.4	20815.7	31373.4	32754.8	21236.2	456.362	5146.72	3787.7	-1.04403	1.47735	1.5424
2608	0.0161358	4.92	19.871				3840.47	2677.56	3009.24	2011.33	1272	913.796	2348.99	3182.04	3550.94	3175.76	1399.04	3027.32	599.07	559.688	615.729	2.26995	1.04903	-2.16385
1887	0.016278	4.68	32.226				1949.36	2378.05	1636.1	1362.27	1339.05	1258.39	1788.58	1575.25	1760.06	1987.84	1319.9	1707.96	372.465	54.5252	115.815	1.50605	1.16386	-1.29401
782	0.0163634	7.43	73.228				878.131	680.176	693.571	1013.36	849.706	971.031	673.494	386.386	463.984	750.626	944.699	507.955	110.625	84.9459	148.519	-1.25855	1.47774	1.85981
1442	0.0166163	4.74	44.011				3297.65	3584.73	3877.13	3972.93	3508.08	4395.83	4545.43	5260.2	6140.02	3586.5	3958.95	5315.22	289.743	444.036	798.718	-1.10385	-1.48201	-1.34258
2017	0.0175439	4.92	29.851				1182.31	704.368	1043.67	1360.64	2029.25	1480.95	1647.43	2031.03	2366.52	976.785	1623.61	2014.99	245.893	356.407	359.817	-1.6622	-2.06288	-1.24106
773	0.0179839	4.59	73.507				1739.88	1603.2	2155.65	1640.44	1478.21	1234.28	1190.49	1265	1131.62	1832.91	1450.98	1195.7	287.731	204.445	66.8439	1.26322	1.53291	1.21349
1490	0.0182032	6.82	42.258				6201.81	6028.01	6030.89	7246.45	9765.99	9659.31	7734.31	6492.58	7282.13	6086.9	8890.58	7169.67	99.5241	1424.86	628.458	-1.46061	-1.17789	1.24003
2025	0.0189951	8.14	29.749				6934.95	6922.04	5882	6651.64	6303.09	6414.04	7870.36	10101.4	8047.74	6579.66	6456.25	8673.15	604.226	178.068	1240.04	1.01911	-1.31818	-1.34337
657	0.0192147	4.59	86.538				1924.11	2253.03	2666.54	2215.28	2073.66	2633.81	1761.7	1264.8	1095.05	2281.22	2307.58	1373.85	372.02	291.26	346.443	-1.01155	1.66046	1.67965
778	0.0196763	7.23	73.414				1124.67	2417.61	1356.29	2610.59	3244.82	2458.06	1300.42	1235	849.546	1632.86	2771.16	1128.32	689.412	417.232	243.633	-1.69712	1.44715	2.456
4276	0.0213043	8.61	114.706				5917.66	8498.68	11578.1	14441.7	23087	16123.8	7863.92	9026.04	10297.5	8664.82	17884.2	9062.48	2833.9	4583.62	1217.19	-2.064	-1.04589	1.97343
2164	0.0215951	5.64	27.145				3101.04	2538.74	3532.56	3093.45	3095.72	3344.06	3931.66	4274.82	4146.58	3057.44	3177.74	4117.68	498.341	144.038	173.395	-1.03935	-1.34677	-1.29579
830	0.0218299	5.67	70.989				623.376	621.342	669.87	569.775	533.579	570.902	537.306	358.242	346.322	638.196	558.086	413.957	27.4491	21.2306	106.99	1.14355	1.5417	1.34817
3449	0.0226061	6.46	14.983				3890.3	3778.05	3822.9	4155.22	4100.2	5551.94	5109.07	5247.4	5606.05	3830.42	4602.46	5320.84	56.5006	822.74	256.499	-1.20156	-1.3891	-1.15609
4091	0.0230084	7.71	23.568				15253.2	11544.1	10685.4	14609.7	13963.3	14964.6	16754.9	17948.2	18379.4	12494.2	14512.5	17694.2	2427.62	507.708	841.534	-1.16154	-1.41619	-1.21923
1428	0.0230719	7.2	44.742				3251.67	3263.93	2386.36	1514.56	1316.89	1696.82	2832.56	1605.16	1873.22	2967.32	1509.42	2103.64	503.163	190.016	645.329	1.96586	1.41056	-1.39367
2075	0.023652	5.2	28.83				1146.7	901.11	1459.88	1573.16	2111.31	1652.39	1836.91	1800.04	2154.6	1169.23	1778.95	1930.51	280.064	290.542	194.934	-1.52147	-1.6511	-1.0852
1230	0.0240574	8.07	51.399				17089.1	14933.9	12012.3	12325	10172.3	11840.1	10717.6	9501.8	8846.81	14678.4	11445.8	9688.74	2548.03	1129.24	949.294	1.28243	1.515	1.18135
812	0.024058	7.43	71.828				3035.61	2656.51	2128.34	2337.13	2481.99	3315	1973.07	1473.35	1396.56	2606.82	2711.38	1614.33	455.674	527.75	313.046	-1.04011	1.6148	1.67957
679	0.0243485	7.93	83.145				26118.5	24634.9	21532.7	22117.5	24872.9	24738.2	19496.4	20433.2	17300.1	24095.4	23909.6	19076.6	2340.02	1553.41	1608.2	1.00777	1.26309	1.25335
3365	0.024403	7.91	15.426				3733.54	2678.16	2788.19	1645.26	2015.08	1712.36	1495.05	2202.04	1147.15	3066.63	1790.9	1614.75	580.175	197.02	537.531	1.71234	1.89914	1.10909
4083	0.025089	9.19	49.513				16912.4	10966.5	20129.3	48067.1	41775.4	22877	31932.5	32243.3	44660.8	16002.7	37573.2	36278.9	4648.64	13110.3	7260.64	-2.34793	-2.26704	1.03568
3734	0.0254962	7.17	59.795				2987.73	2978.23	2283.11	2344.44	2473.33	3214.66	3910.86	3955.04	3686.04	2749.69	2677.48	3850.65	404.096	469.657	144.258	1.02697	-1.40039	-1.43816
1257	0.0257979	8.84	49.903				41315.3	47495.7	42391.5	67795.5	58236.5	50729.1	61896.5	52860	65610.4	43734.2	58920.4	60122.3	3301.71	8553.72	6557.72	-1.34724	-1.37472	-1.0204
1522	0.0261145	7.91	41.139				12426.1	13405.1	11822.9	14250	26600.1	14279.5	8885.02	8274.01	9897.28	12551.4	18376.5	9018.77	798.468	7121.86	819.856	-1.4641	1.3917	2.03759
1515	0.0269186	8.06	41.382				12185.3	13203.7	10909.5	12460.8	15092	11573	10461.2	7747.26	6694.91	12099.5	13042	8301.11	1149.49	1830.06	1943.25	-1.0779	1.45757	1.57111
806	0.0274741	7.23	72.108				1124.08	1132.7	718.111	1707.97	2489.21	1645.48	1232.96	794.813	603.055	991.631	1947.56	876.944	236.915	470.127	322.886	-1.96399	1.13078	2.22084
2029	0.0292342	6.62	29.698				4841.7	3860.56	4227.51	4397.7	3904.39	5002.24	6653.71	5445.43	5586.93	4309.93	4434.78	5895.36	495.735	549.862	660.554	-1.02897	-1.36786	-1.32935
1235	0.0294891	6.91	51.119				11429.7	8497.19	9062.57	13764.3	11857.6	14922	10862.2	11494.1	11003.8	9663.16	13514.7	11120.1	1555.79	1547.37	331.58	-1.39857	-1.15077	1.21534
2047	0.0297621	5.11	29.315				639.592	510.033	407.73	355.745	366.544	454.553	783.416	690.139	555.924	519.118	392.281	676.493	116.198	54.1992	114.358	1.32333	-1.30316	-1.72451
2373	0.029993	5.97	23.618				2028.65	1699.55	1686.7	1951.33	1898.18	1875.03	2567.81	2036.85	2574.73	1804.97	1908.18	2393.13	193.824	39.1228	308.567	-1.05718	-1.32586	-1.25414
4071	0.0303759	5.79	37.292				995.867	1336.83	1157.16	1156.53	1501.45	1584.46	2758.11	1555.55	2280.14	1163.28	1414.15	2197.93	170.562	226.929	605.48	-1.21565	-1.88942	-1.55424
3395	0.0305955	7.81	15.284				8218.3	6403.27	4309.46	3300.97	3045.57	3652.49	4606.29	5296.27	4254.51	6310.34	3333.01	4719.03	1956.07	304.726	529.95	1.89329	1.33721	-1.41585
1458	0.0307226	8.24	43.232				2246.38	2618.07	2020.63	2218.13	1647.28	1332.32	3108.54	2887.22	2559.24	2295.03	1732.57	2851.66	301.681	449.024	276.373	1.32463	-1.24254	-1.64591
2125	0.0309195	7.63	27.936				3285.83	3543.75	3331.86	2554.09	3710.67	2862.86	4015.05	6096.01	4601.52	3387.15	3042.54	4904.19	137.563	598.861	1072.99	1.11326	-1.44788	-1.61187
1438	0.0309797	6.18	44.255				1954.15	1652.55	1913.01	1298.63	1086.05	1800.48	2525.23	1946.14	2788.15	1839.91	1395.05	2419.84	163.553	366.845	430.787	1.31888	-1.3152	-1.73458
3919	0.0309889	8.84	57.183				6926.16	9336.53	6784.83	4626.74	5241.72	6441.83	8054.63	8139.72	7562.36	7682.5	5436.76	7918.9	1434.17	923.135	311.694	1.41307	-1.03077	-1.45655
1723	0.0310517	7.81	35.545				3800.31	5234.04	3667.38	1824.11	3507.01	2292.89	4816.29	6993.13	4326.01	4233.91	2541.34	5378.48	868.684	868.525	1419.66	1.66602	-1.27033	-2.1164
4072	0.0320072	5.86	37.438				3280.91	3324.17	2526.3	2955.6	3603.08	3580.69	5484.12	3901.21	4518.92	3043.79	3379.79	4634.75	448.682	367.526	797.788	-1.11039	-1.52269	-1.37131
1728	0.0321848	7.09	35.468				5112.05	5918.6	5977.42	3642.56	6314.59	5582.93	9549.82	7319.74	9174.82	5669.36	5180.03	8681.46	483.534	1380.83	1194.1	1.09447	-1.5313	-1.67595
1364	0.0324226	7.93	46.592				1149.71	930.8	783.313	665.767	801.785	902.877	1269.18	1108.8	1605.84	954.608	790.143	1327.94	184.356	118.983	253.676	1.20815	-1.39108	-1.68063
981	0.0326606	4.98	64.739				8574.44	7882.56	8540.07	7391.25	7005.12	8078.21	6878.14	5002.66	6504.8	8332.36	7491.53	6128.53	389.911	543.526	992.74	1.11224	1.3596	1.2224
1516	0.0328398	5.19	41.236				412.568	407.419	459.568	625.72	644.881	527.619	722.372	508.413	544.859	426.519	599.407	591.881	28.7375	62.9039	114.468	-1.40535	-1.3877	1.01272
1287	0.033492	4.9	48.783				1464.2	1311.84	1371.14	1312.05	1582.39	1161.3	1846.7	1701.67	2505.27	1382.4	1351.91	2017.88	76.8008	213.356	428.279	1.02255	-1.4597	-1.49261
1290	0.0336154	5.17	48.685				349.911	354.695	329.991	401.494	396.161	452.221	420.994	365.386	430.496	344.866	416.626	405.625	13.1019	30.942	35.1708	-1.20808	-1.17618	1.02712
1554	0.0336303	6.98	39.775				3504.54	4594.21	4657.67	2326.13	1766.09	3149.66	3434.42	3743.22	2937.05	4252.14	2413.96	3371.57	648.215	695.954	406.744	1.76148	1.26118	-1.39669
1790	0.0336789	6.67	34.396				2544.66	3077.28	2470.39	1274.64	1583.04	2135.56	2419.85	2131.69	2007.13	2697.44	1664.41	2186.22	331.039	436.188	211.695	1.62066	1.23384	-1.31351
1773	0.0339037	4.84	34.626				793.085	360.672	522.908	931.145	1039.38	857.58	1100.14	876.612	1105.11	558.888	942.7	1027.28	218.44	91.447	130.51	-1.68674	-1.83809	-1.08973
1260	0.0348604	5.44	49.757				3062.28	2472.34	2704.77	3230.47	4229.32	3996.98	4740.54	3367.37	3973.32	2746.46	3818.92	4027.07	297.174	522.688	688.158	-1.39049	-1.46628	-1.0545
1711	0.0349263	3.96	35.672				3200.19	3105.65	3776.42	3472.74	4300.47	4282.71	4698.03	4153.59	5385.6	3360.75	4018.64	4745.74	363.067	472.842	617.391	-1.19576	-1.41211	-1.18093
4304	0.0356657	4.32	16.021				990.029	1150.08	1516.73	1343.09	1712.32	1164	1888.56	2066.32	1855.54	1218.95	1406.47	1936.81	270.019	279.601	113.37	-1.15384	-1.58892	-1.37707
4047	0.035807	6.96	47.712				2890.61	1884.92	2026.3	964.055	1413.94	1529.47	1786.06	1681.71	1772.51	2267.28	1302.49	1746.76	544.43	298.731	56.7404	1.74073	1.29799	-1.34109
525	0.0372896	5.05	103.846				3392.02	3461.85	4608.39	2741.34	3181.34	3071.8	3043.87	2186.93	2122.56	3820.75	2998.16	2451.12	683.007	229.059	514.347	1.27436	1.55878	1.22318
2145	0.037506	7.86	27.553				5031.64	5940.68	5166.05	7030.43	10847.1	8364.57	3928.42	6755.3	4029.28	5379.46	8747.35	4904.33	490.655	1936.89	1603.78	-1.62607	1.09688	1.7836
1202	0.0375437	4.91	53.265				3066.63	1911.45	1718.4	2317.13	1957.96	2185.5	3598.41	3027.26	4121.91	2232.16	2153.53	3582.53	729.087	181.704	547.498	1.03651	-1.60496	-1.66356
1727	0.0383046	5.82	35.468				4459.91	3437.04	3218.12	3560.24	3637.5	3509.99	4787.82	4332.59	5126.9	3705.02	3569.24	4749.1	662.852	64.2292	398.571	1.03804	-1.2818	-1.33056
1798	0.0383092	6.41	34.115				775.08	1086.78	861.712	629.883	479.663	672.557	750.634	643.48	735.781	907.859	594.034	709.965	160.895	101.321	58.0547	1.52829	1.27874	-1.19516
1726	0.039894	4.99	35.468				774.019	842.097	855.038	1403.11	1463.47	1020.99	999.391	1064.17	1464.6	823.718	1295.85	1176.05	43.5242	239.947	251.978	-1.57318	-1.42774	1.10187
1872	0.0412942	7.77	32.583				131195	129554	118795	123234	122045	106068	91163.9	100150	112279	126515	117116	101198	6735.58	9585.92	10596.5	1.08026	1.25018	1.1573
2021	0.0418799	7.01	29.8				3362.88	2796.81	2945.62	2463.39	2481.75	3204.19	3466.18	3646.91	3616.15	3035.1	2716.44	3576.41	293.453	422.499	96.6953	1.11731	-1.17835	-1.31658
648	0.0419388	7.15	87.217				487.889	513.39	413.933	479.22	694.262	670.468	465.257	308.675	264.07	471.737	614.65	346.001	51.6581	117.888	105.66	-1.30295	1.3634	1.77644
4098	0.042593	7.97	29.57				4715.12	3945.32	4047.79	5243.17	4790.58	4790.05	2090.75	4157.07	2528.01	4236.08	4941.27	2925.28	418.016	261.459	1088.94	-1.16647	1.4481	1.68916
2030	0.0430571	7.26	29.647				3936.17	3805.82	3099.99	3103.42	2700.24	2679.82	3250.25	3755.02	3537.84	3613.99	2827.83	3514.37	449.883	238.888	253.205	1.27801	1.02835	-1.24278
1130	0.0450171	7.01	56.81				3411.42	2313.45	2575.37	3310.85	5079.14	3864.54	2825.17	2492.51	2590.96	2766.75	4084.85	2636.21	573.456	904.496	170.884	-1.47641	1.04952	1.54952
3547	0.0457909	6.54	14.158				5163.87	5683.58	5721.69	5891.01	6160.89	7317.92	8303.47	6370.36	7489.58	5523.05	6456.61	7387.8	311.643	758.025	970.563	-1.16903	-1.33763	-1.14422
1352	0.046936	7.8	46.981				2169.95	1646.09	1318.91	1278.43	852.19	1073.87	1519.91	3301.44	2353.57	1711.65	1068.17	2391.64	429.293	213.178	891.375	1.60242	-1.39727	-2.23902
466	0.0469773	4.8	112.67				1831.44	2080.3	2644.6	1436.43	1426.43	1804.08	2010.99	2478.84	2086.48	2185.45	1555.65	2192.1	416.65	215.206	251.174	1.40485	-1.00305	-1.40912
1797	0.0474303	7.47	34.217				11250.9	11996.6	13805.2	10259.7	11252	8033.06	6902.85	9387.68	8769.71	12350.9	9848.26	8353.42	1313.51	1648.44	1293.67	1.25412	1.47854	1.17895
958	0.0476275	5.13	65.672				1485.23	1060.39	1411.08	1221.54	1379.93	1247.95	1656.77	1645.05	1715.17	1318.9	1283.14	1672.33	226.93	84.859	37.5626	1.02787	-1.26797	-1.30331
1639	0.0476286	6.49	36.974				5895.4	4118.01	5903.76	2396.9	2245.48	4226.56	4166.65	5049.67	4334.78	5305.72	2956.31	4517.03	1028.59	1102.67	468.874	1.79471	1.1746	-1.52793
4286	0.0485622	7.88	11.515				30255.2	37113.1	40283.6	38539.5	32507.5	40497.9	25560.1	27668.9	30247	35884	37181.6	27825.3	5125.94	4164.65	2347.38	-1.03616	1.28962	1.33625
2833	0.0496511	6.22	18.295				3198.59	3135.91	3722.5	2536.95	3518.77	3794.03	4911.54	8351.19	4411.19	3352.33	3283.25	5891.31	322.099	660.807	2144.96	1.02104	-1.75738	-1.79435
1800	0.0498329	6.32	34.089				714.466	882.386	909.974	650.735	443.837	359.116	769.475	567.666	857.484	835.609	484.563	731.542	105.816	150.014	148.586	1.72446	1.14226	-1.50969
4455	0.0511182	4.08	15.439				1406.2	2970.86	3244.17	4353.65	4592.93	3086.67	5014.09	4765.6	5477.39	2540.41	4011.08	5085.69	991.71	809.454	361.256	-1.57891	-2.00192	-1.26791
1188	0.0511204	4.46	54.011				951.238	828.724	808.407	602.396	1183.92	728.118	329.634	588.78	485.931	862.79	838.145	468.115	77.2691	305.978	130.488	1.0294	1.84311	1.79047
4399	0.0512098	8.53	34.906				10200.6	13616.8	8582.1	18502.5	18159.8	18079.3	9605.11	12469.6	16969.6	10799.8	18247.2	13014.8	2570.28	224.734	3712.4	-1.68958	-1.20509	1.40204
4015	0.0513037	6.33	103.507				895.119	553.195	644.873	364.829	369.443	444.679	1103.46	662.063	537.828	697.729	392.983	767.783	176.984	44.8287	297.266	1.77547	-1.1004	-1.95373
1736	0.052325	8.1	35.366				144882	144109	116722	130121	151743	111127	98343	97798.2	108320	135238	130997	101487	16040	20322.2	5923.51	1.03237	1.33256	1.29078
1211	0.052695	6.38	52.239				1486.3	1170.91	1129.13	1292.63	1540.5	2087.58	1035.97	866.433	1130.61	1262.12	1640.24	1011.01	195.27	406.752	133.848	-1.29959	1.24838	1.62238
3289	0.0545365	5.57	15.827				12784.4	11427.5	13472.3	17266.3	17845.4	14327.9	16378.2	13654.7	17771.1	12561.4	16479.8	15934.6	1040.47	1886.02	2093.73	-1.31194	-1.26854	1.03421
1744	0.0548553	8.29	35.162				23202.9	15972.8	19400.2	11414.7	13399.9	9357.33	15873.4	13385	9025.88	19525.3	11390.6	12761.4	3616.71	2021.38	3466.08	1.71415	1.53003	-1.12034
2404	0.0549237	6.9	23.09				5345.88	5631.35	4574.41	4853.18	3614.4	3983.36	5990.07	5194.44	5217.66	5183.88	4150.32	5467.39	546.78	636.043	452.801	1.24903	-1.05469	-1.31734
758	0.0549265	5.61	74.16				3032.38	2077.87	2061.32	772.405	1060.97	1273.08	2351.66	1148.13	3054.89	2390.52	1035.48	2184.89	555.926	251.309	964.259	2.30861	1.09411	-2.11002
924	0.0576651	8.79	66.978				24135	20801.8	20912.1	19768.5	13919.2	12033.7	21944.7	21908.4	18517.2	21949.6	15240.5	20790.1	1893.41	4033.09	1968.49	1.44022	1.05577	-1.36414
2216	0.0576666	7.05	26.123				2056.5	2086.71	1815.67	1613.9	1441.95	1478.82	1599.61	2215.19	2306.47	1986.29	1511.56	2040.43	148.533	90.5316	384.472	1.31407	-1.02725	-1.34988
4037	0.0582136	5.58	38.217				6301.45	4346.54	4598.34	4858.33	6689.18	7451.63	7741.77	7869.77	7622.67	5082.11	6333.05	7744.74	1063.46	1332.83	123.575	-1.24615	-1.52392	-1.22291
1098	0.0583422	6.15	58.209				4085.14	3003.27	3797.54	3208.58	3446.2	3657.13	4378.99	4435.29	6546.59	3628.65	3437.3	5120.29	560.361	224.405	1235.53	1.05567	-1.41107	-1.48963
3611	0.0623978	7.65	13.148				101664	141093	113724	106794	106280	131602	85704.5	91096.9	92210.8	118827	114892	89670.7	20203.9	14473.6	3479.72	1.03425	1.32515	1.28127
1360	0.0627723	7.31	46.738				5330.98	6023.01	4467.44	5811.76	4718.93	5424.37	6323.18	6965.42	6692.44	5273.81	5318.35	6660.35	779.359	554.075	322.32	-1.00845	-1.26291	-1.25233
1015	0.0628181	4.89	62.78				2428.89	1881.75	1878.67	2446.48	2021.54	1889.39	1130.13	1342.7	1836.26	2063.1	2119.14	1436.36	316.784	291.083	362.261	-1.02716	1.43634	1.47535
1205	0.0644512	4.99	52.985				1791.68	1069.37	951.326	1438.44	1368.53	1348.14	1988.8	1748.97	2717.07	1270.79	1385.04	2151.61	454.949	47.3543	504.168	-1.0899	-1.69312	-1.55347
4052	0.0645125	6.13	36.974				11418.2	10432.4	11671.6	13254.1	11592.9	16583.3	16328.1	13270.1	17488.7	11174.1	13810.1	15695.6	654.685	2541.27	2179.29	-1.23591	-1.40465	-1.13653
1147	0.0652629	6.14	55.97				2693.35	1950.94	2743.1	1787.19	1293.68	1911.92	2326.15	2215.63	3136.27	2462.46	1664.26	2559.35	443.691	326.939	502.672	1.47961	-1.03934	-1.53783
2104	0.0653337	7.88	28.243				4316.44	4548.2	3657.22	5550.38	6761.27	5175.88	5062.59	8444.43	5976.65	4173.96	5829.18	6494.56	462.265	828.651	1749.4	-1.39656	-1.55597	-1.11415
3972	0.065631	6.67	96.38				225.601	282.526	368.64	312.749	378.182	571.01	598.579	642.665	417.321	292.256	420.647	552.855	72.0141	134.265	119.428	-1.43931	-1.89168	-1.31429
712	0.0658036	8.08	78.733				88650.8	68291.1	63141	71123.5	65807.4	68298	54464.1	56170.4	58987.9	73360.9	68409.6	56540.8	13489.4	2659.85	2284.56	1.07238	1.29749	1.20992
4054	0.0679035	9.05	34.626				27363.6	14177.2	12933.4	15769.3	18953.6	10281.8	27367.7	26980.6	35389.3	18158.1	15001.6	29912.5	7996.45	4386.59	4746.96	1.21041	-1.64734	-1.99396
1279	0.0679289	6.27	49.172				407.338	343.476	469.49	543.519	356.794	454.343	609.803	544.446	585.706	406.768	451.552	579.985	63.0088	93.3939	33.0519	-1.1101	-1.42584	-1.28443
748	0.0681401	6.52	74.534				1286.71	997.826	1339.12	1131.06	1140.62	1607.68	1097.45	629.137	560.742	1207.88	1293.12	762.441	183.794	272.461	292.13	-1.07057	1.58423	1.69602
739	0.0689423	6.4	74.72				477.052	368.622	405.19	950.052	524.089	391.452	310.936	330.172	211.776	416.955	621.864	284.294	55.1642	291.854	63.5351	-1.49144	1.46663	2.18739
1294	0.0693378	6.92	48.637				2982.4	2207.8	2532.66	1505.25	2016.84	2405	1949.68	1173.73	1518.45	2574.29	1975.7	1547.29	388.975	451.285	388.778	1.30298	1.66374	1.27688
2621	0.0698524	7.31	19.806				9842.26	12523.6	14474.5	11115.7	15491.5	14581.1	7758.12	11073	7664.95	12280.1	13729.5	8832.03	2325.69	2308.88	1941.32	-1.11802	1.39041	1.55451
3996	0.0707083	7.73	88.575				3977.72	4065.09	3537.63	2512.69	2721.37	3672.11	2737.57	3192.59	2343.79	3860.15	2968.72	2757.98	282.701	618.025	424.768	1.30027	1.39963	1.07641
1311	0.071294	4.81	48.199				2054.18	1794.33	1827.27	1488.8	1745.09	1425.73	1910.52	1644.92	1847.92	1891.93	1553.21	1801.12	141.481	169.14	138.848	1.21808	1.05042	-1.15961
665	0.0729592	6.89	86.199				1191.98	1332.21	1223.5	946.102	747.134	1099.8	1092.77	795.063	752.01	1249.23	931.013	879.948	73.57	176.818	185.564	1.3418	1.41966	1.05803
1249	0.073488	5.38	50.093				4415.53	3485.78	4195.83	4561.3	4689.31	5588.73	5197.04	4648.05	5851.66	4032.38	4946.45	5232.25	485.95	559.907	602.574	-1.22668	-1.29756	-1.05778
828	0.0745146	7.71	71.082				23354	19769	19071.9	20298.3	14350.8	20513.3	16302.6	14632.9	13609.8	20731.7	18387.5	14848.4	2297.64	3497.54	1359.32	1.12749	1.39622	1.23834
1456	0.0745254	4.77	43.281				1804.8	1877.88	1414.5	1772.94	1504.55	1868.82	2097	2175.32	2102.33	1699.06	1715.44	2124.88	249.129	188.821	43.7585	-1.00964	-1.25062	-1.23868
1039	0.0750218	6.75	61.381				1187.37	2213.36	2439.11	1536.74	1384.75	2029.61	1124.46	926.831	1080.63	1946.61	1650.37	1043.97	667.144	337.11	103.789	1.1795	1.86462	1.58085
3848	0.0753774	6.92	42.891				3731.71	3609.63	2733.15	3900.01	4076.31	5908.88	4381.66	5210.31	5018.11	3358.16	4628.4	4870.03	544.707	1112.42	433.718	-1.37825	-1.45021	-1.0522
1835	0.0758305	7.88	33.374				19312.6	17076.6	13529.3	19093.4	21123.4	19057.4	16032.8	15170.9	14653.1	16639.5	19758.1	15285.6	2916.33	1182.58	696.977	-1.18742	1.08858	1.2926
1104	0.0790395	5.84	57.836				2668.27	2947.22	3064.35	1589.16	1837	2232.92	2815.24	1608.1	2140.17	2893.28	1886.36	2187.84	203.476	324.709	604.982	1.53379	1.32244	-1.15982
1226	0.0804417	7.67	51.679				5936.21	5259.89	3538.95	5352.97	4988.69	6721.31	4049.35	3640.22	3390.85	4911.68	5687.66	3693.47	1235.98	913.513	332.461	-1.15799	1.32983	1.53992
1540	0.0814731	6.61	40.213				3373.01	2945.2	2806.67	3518.66	3050.69	3500.14	3600.17	3644.76	3499.05	3041.63	3356.5	3581.32	295.224	265	74.6586	-1.10352	-1.17744	-1.06698
633	0.0822911	6.59	89.253				1731.32	1492.51	2219.68	1938.07	1450.27	1813.8	1574.06	979.452	1005.6	1814.51	1734.05	1186.37	370.652	253.494	336.002	1.0464	1.52946	1.46164
4400	0.0844245	8.69	34.881				10554.8	10076.2	6176.22	21355.1	20411.1	11427.4	11230	6883.22	12153.5	8935.75	17731.2	10088.9	2401.77	5479.62	2814.35	-1.9843	-1.12905	1.75749
4042	0.0858455	5.36	60.261				132109	139290	152420	112015	93019.5	134336	96755.3	64513.1	113694	141273	113123	91654.3	10300	20680.6	24984.3	1.24884	1.54137	1.23424
1792	0.0872257	7.99	34.345				15656.6	18770.7	12140.3	13690.9	14074.7	8413.72	7141.27	8612.98	11125.6	15522.5	12059.8	8959.95	3317.24	3163.4	2014.7	1.28713	1.73244	1.34596
4057	0.0878276	4.8	66.045				25394.4	28535.5	31205	26729.2	24883.8	32179.9	19574.7	17659.1	26205.3	28378.3	27930.9	21146.4	2908.5	3793.62	4484.65	1.01602	1.34199	1.32084
3763	0.087856	4.84	47.614				4488.59	3882.72	3553.73	4198.47	4599.38	4776.8	3835.37	3407.93	3921.61	3975.01	4524.89	3721.64	474.213	296.274	275.08	-1.13833	1.06808	1.21583
743	0.0884927	4.95	74.627				4177.6	4893.3	5038.29	2882.13	3292.23	2712.59	3956.31	1856.33	3342.7	4703.06	2962.31	3051.78	460.804	298.023	1079.79	1.58763	1.54109	-1.0302
744	0.0889632	6.62	74.627				1022.09	798.588	644.324	743.784	706.57	949.115	480.677	666.291	540.809	821.667	799.823	562.592	189.937	130.623	94.705	1.02731	1.4605	1.42167
3078	0.089552	7.25	16.938				34393	39451.2	29448.7	31947.3	29693.7	35218.9	49681.7	36761.1	41962.7	34430.9	32286.6	42801.8	5001.35	2778.23	6501.04	1.06642	-1.24312	-1.32568
3614	0.0900232	8.27	13.131				14071.4	18074	17945.6	15664.5	19063.3	18506	20496.3	19802.6	23736.8	16697	17744.6	21345.2	2274.73	1822.87	2099.98	-1.06274	-1.27838	-1.20291
1229	0.0904231	7.8	51.399				15551.3	14205.9	9541.29	17472.2	16251.6	21207.4	13789.1	13510.5	10915.1	13099.5	18310.4	12738.2	3154.05	2582.04	1584.99	-1.3978	1.02836	1.43744
4100	0.0912431	6.01	56.623				2197.99	2333.13	2566.99	1118.93	1683.09	1843.66	2226.52	1478.18	1979	2366.04	1548.56	1894.57	186.684	380.634	381.249	1.5279	1.24885	-1.22344
1868	0.0925949	4.51	32.685				1657.65	1330.98	1255.21	1624.33	2737.31	1963.86	2113.33	1855.51	1745.21	1414.62	2108.5	1904.69	213.857	570.414	188.921	-1.49051	-1.34643	1.10701
1628	0.0935544	5.12	37.243				1097.03	863.104	793.376	2180.22	1112.52	1692.85	1450.33	895.726	979.504	917.838	1661.86	1108.52	159.056	534.524	298.967	-1.81063	-1.20775	1.49917
1406	0.0950171	5.75	45.277				15630.3	18336.9	18010.2	11794.2	10894.1	18756.8	21492.4	18875	19162.9	17325.8	13815	19843.4	1477.39	4303.29	1435.29	1.25413	-1.14531	-1.43637
1246	0.0957857	5.29	50.28				4477.71	4602.53	4275.59	3693.11	3777.92	4138.5	3858.43	4462.96	4574.44	4451.94	3869.84	4298.61	164.984	236.498	385.262	1.15042	1.03567	-1.1108
3281	0.0967664	6.86	15.866				627.609	558.667	855.858	456.316	282.25	506.861	969.107	674.744	525.596	680.712	415.142	723.149	155.549	117.83	225.683	1.63971	-1.06234	-1.74193
1546	0.0973354	5.24	40.019				2245.58	1598.85	1641.2	2715.15	2273.51	2434.64	2159.2	1613.92	2077.54	1828.54	2474.43	1950.22	361.784	223.492	294.091	-1.35323	-1.06655	1.26879
541	0.0977175	4.26	101.81				599.141	447.655	545.638	656.998	493.856	304.101	631.202	855.761	1047.48	530.812	484.985	844.814	76.8236	176.616	208.354	1.09449	-1.59155	-1.74194
964	0.0985626	4.85	65.392				84276.3	86378	96394.1	79409.7	74416.2	90865.1	71024.3	64003.6	81226.9	89016.2	81563.7	72084.9	6475.35	8433.33	8660.48	1.09137	1.23488	1.13149
1274	0.100071	9.05	49.464				42402.2	35952.2	45103.3	73081.9	64738.9	44406.5	48390.3	60639.1	71801.2	41152.6	60742.4	60276.8	4701.78	14749.5	11709.6	-1.47603	-1.46472	1.00772
1126	0.100558	5.12	56.81				4596.74	4100.15	4148.97	3794.22	4449.82	4732.53	5224.48	4608.81	5397.45	4281.95	4325.52	5076.91	273.701	481.345	414.516	-1.01018	-1.18565	-1.17371
2225	0.101603	5.65	26.047				1841.81	1735.3	1685.93	1573.26	1810.39	1491.15	1774.24	1966.67	2353.46	1754.34	1624.93	2031.45	79.6665	165.773	294.997	1.07964	-1.15796	-1.25018
4160	0.101948	7.59	42.891				773.915	659.548	389.48	187.583	666.663	427.595	1030.24	1263.75	743.659	607.648	427.28	1012.55	197.403	239.54	260.498	1.42213	-1.66634	-2.36975
2456	0.102138	9.08	22.01				9134.29	5388.42	8006.74	14467.1	11305.9	7103.91	10154.6	16389.5	17699.4	7509.82	10959	14747.9	1921.74	3693.83	4031.46	-1.45929	-1.96381	-1.34573
1321	0.102324	7.71	47.906				625.205	618.172	475.163	777.518	957.602	672.203	617.031	573.782	751.647	572.846	802.441	647.487	84.6697	144.323	92.7613	-1.4008	-1.1303	1.23932
1539	0.102351	6.48	40.36				1348.59	1264.82	1270.06	836.877	832.016	1252.41	1269.05	1076.42	1313.72	1294.49	973.769	1219.73	46.9232	241.326	126.103	1.32936	1.06129	-1.25258
3852	0.103072	5.14	58.582				986.946	962.755	1139.89	1496.4	1247.19	1674.71	1385.67	833.448	1110.33	1029.87	1472.77	1109.81	96.0526	214.74	276.11	-1.43006	-1.07763	1.32704
3908	0.103105	9.19	53.545				2739.43	2085.14	5531.17	6892.25	7797.4	3453.8	5198.91	9959.07	9914.84	3451.91	6047.81	8357.6	1830.17	2291.62	2735.6	-1.75202	-2.42115	-1.38192
3875	0.109004	4.34	103.167				765.152	410.902	680.657	628.994	666.038	400.285	773.757	967.463	1061.02	618.904	565.106	934.079	185.022	143.935	146.512	1.0952	-1.50925	-1.65293
4023	0.109417	6.93	99.434				6984.71	7623.43	6888.41	7640.39	8216.09	9657.45	7927.1	3380.81	4576.85	7165.52	8504.64	5294.92	399.479	1039.03	2356.67	-1.18688	1.35328	1.60619
1430	0.109685	6.83	44.644				1903.17	1888.3	1730.45	940.819	745.417	1440.72	1807.01	1166.34	831.879	1840.64	1042.32	1268.41	95.722	358.59	495.515	1.76591	1.45114	-1.21691
3995	0.112266	7.77	86.538				5607.34	5562.48	4416.88	4814.87	4602.41	4797.48	3463.79	4907.33	3408.95	5195.57	4738.25	3926.69	674.734	117.968	849.702	1.09652	1.32314	1.20668
2221	0.113473	7.65	26.098				4142.24	5215.66	3865	4055.73	4045.73	4092.92	4688.1	7687.36	5222.34	4407.63	4064.79	5865.93	713.371	24.864	1599.86	1.08434	-1.33086	-1.44311
2465	0.114678	6.54	21.709				4705.16	4343.13	3677.52	4489.64	5584.1	5407.92	3641.21	4153.18	4565.01	4241.93	5160.55	4119.8	521.24	587.665	462.803	-1.21656	1.02965	1.25262
4018	0.115337	6.99	99.095				2174.26	2410.46	2553.12	2595.65	2872.49	3078.84	2776.78	1300.22	1300.4	2379.28	2848.99	1792.46	191.344	242.454	852.443	-1.19742	1.32738	1.58943
1196	0.116927	5.32	53.638				3960.01	3150.53	3091.73	3450.52	3427.53	3292.47	4126.68	3684.58	5551.43	3400.76	3390.17	4454.23	485.219	85.3899	975.577	1.00312	-1.30978	-1.31386
4465	0.118175	9.42	32.991				51282.4	27379	44714.3	88531.7	72172.1	72215	26366.7	62924.4	58123.3	41125.2	77639.6	49138.1	12349.3	9432.88	19866.2	-1.88788	-1.19484	1.58003
4036	0.12031	9.21	56.81				7772.53	7308.06	10817.4	8454.34	11689.2	3876.89	3017.91	4439.19	5054.43	8632.66	8006.8	4170.51	1906.22	3925.32	1044.51	1.07817	2.06993	1.91986
1591	0.120627	7.61	38.801				12009.5	9093.23	6796.2	10876.8	12147.3	12216.2	9250.94	7143.92	8235.42	9299.63	11746.8	8210.09	2612.75	754.193	1053.74	-1.26315	1.13271	1.43078
4079	0.120815	8.06	49.416				8538.24	7549.58	6476.77	9036.52	8081.9	9078.24	7877.52	6828.34	7041.38	7521.53	8732.22	7249.08	1031.02	563.576	554.569	-1.16096	1.03758	1.2046
4025	0.121535	7.02	99.095				2969.31	3632.16	3484.49	4481.3	4424.39	4633.31	4383.58	1757.79	2102.18	3361.99	4513	2747.85	347.994	108.009	1427.01	-1.34236	1.2235	1.64238
1630	0.121543	6.58	37.243				605.917	708.083	699.461	972.368	674.641	1119.02	825.07	879.99	1043.01	671.154	922.009	916.023	56.6608	226.428	113.35	-1.37377	-1.36485	1.00653
807	0.123489	5.41	72.015				917.324	855.652	951.386	1675.01	990.33	1160.25	990.976	1011.76	1041.24	908.121	1275.19	1014.66	48.5261	356.519	25.256	-1.40421	-1.11732	1.25677
3939	0.124817	6.99	60.168				2071.41	1893.6	1990.48	1430.22	1004.21	1845.77	1698.87	1278.61	1360.8	1985.16	1426.74	1446.09	89.0263	420.79	222.737	1.3914	1.37278	-1.01357
1062	0.125029	5.6	60.168				5953.37	5924.15	6815.08	2675.25	3867.81	5125.82	6635.22	3813.45	4722.57	6230.87	3889.62	5057.08	506.155	1225.43	1440.32	1.60192	1.23211	-1.30015
4358	0.125642	7.65	111.312				540.488	483.224	590.138	705.984	582.832	951.593	740.896	655.337	630.971	537.95	746.803	675.735	53.5024	187.739	57.7316	-1.38824	-1.25613	1.10517
2004	0.125963	5.97	30.209				3839.45	3183.81	2718.08	2754.12	3097.48	3161.16	3907.31	3375.79	4633.43	3247.11	3004.25	3972.18	563.357	218.951	631.323	1.08084	-1.2233	-1.32218
795	0.126306	5.27	72.481				2277.61	3186.26	2735.81	2169.24	2385.67	2366.89	3130.8	2572.77	3034.42	2733.22	2307.27	2912.66	454.33	119.901	298.276	1.18461	-1.06565	-1.26239
4043	0.127083	5.44	103.507				1152.12	1276.48	1343.48	1475.52	1266.17	1777.61	1181.27	1255.27	847.527	1257.36	1506.43	1094.69	97.102	257.118	217.224	-1.19809	1.1486	1.37613
3978	0.128	5.24	128.62				4089.16	4820.74	4215.66	2936.93	3861.54	4093.82	4140.96	2267.43	2049.44	4375.19	3630.76	2819.28	391.01	611.998	1149.79	1.20503	1.55188	1.28783
666	0.129559	5.49	85.86				680.815	797.18	630.187	799.6	1523.41	895.899	766.721	742.756	711.042	702.727	1072.97	740.173	85.6256	393.051	27.9292	-1.52686	-1.05329	1.44962
1850	0.131161	6.02	33.094				1154.53	1394.94	1083.18	1051.01	1113.01	1435.37	1604.16	1300.23	2004.72	1210.88	1199.8	1636.37	163.34	206.353	353.347	1.00924	-1.35139	-1.36387
819	0.132235	7.62	71.549				15828.4	12273.4	11466.6	9404.58	8300.02	12934	11415.5	7519.62	6328.87	13189.5	10212.9	8421.32	2320.73	2420.4	2660.47	1.29146	1.5662	1.21274
2168	0.134275	7.73	27.094				6052.15	5123.04	2468.38	6261.42	6484.76	7400.45	6547.95	8520.39	6655.09	4547.86	6715.54	7241.14	1859.83	603.568	1109.16	-1.47664	-1.59221	-1.07827
3572	0.134463	9.21	13.754				4053.88	1969.39	2518.62	2422.63	2423.09	1234.16	2747.8	4739.68	4387.78	2847.3	2026.63	3958.42	1080.41	686.299	1063.09	1.40494	-1.39024	-1.95321
1814	0.138627	5.4	33.809				12334.7	11788.5	12224.5	12151.8	13700.2	14366.7	12704.2	13365.5	13896.2	12115.9	13406.2	13322	288.819	1136.32	597.203	-1.1065	-1.09955	1.00632
4029	0.14305	8.24	54.944				17656.7	14695.9	10613.2	21439	17187.5	19308.3	14767.2	16504.6	16670	14321.9	19311.6	15980.6	3536.63	2125.78	1054.08	-1.34839	-1.11581	1.20844
1837	0.145573	7.99	33.349				6446.18	7949.46	4973.9	3289.32	5161.83	5317.46	5743.87	6836.02	10379	6456.51	4589.54	7652.96	1487.81	1128.71	2423.15	1.40679	-1.18531	-1.66748
1331	0.146117	6.32	47.468				1027.92	748.333	905.984	1005.67	1070.69	949.884	1217.29	967.435	1185.5	894.08	1008.75	1123.41	140.175	60.459	136.01	-1.12825	-1.2565	-1.11367
536	0.148196	5.39	102.489				1166.9	1257.04	1420.91	1752.09	1260.51	1141.54	1249.63	736.334	905.789	1281.61	1384.71	963.917	128.777	323.671	261.536	-1.08044	1.32959	1.43655
945	0.148293	6.81	66.418				1055.88	889.221	1211.6	1468.32	765.488	876.846	1283.23	1732.17	1491.02	1052.23	1036.88	1502.14	161.219	377.76	224.676	1.0148	-1.42757	-1.4487
884	0.148735	5.58	68.75				1272.14	968.742	772.572	1005.34	1218.74	1453.06	1368.52	1574.27	1280.63	1004.49	1225.71	1407.81	251.696	223.938	150.707	-1.22024	-1.40152	-1.14856
1178	0.149759	6.19	54.384				1046.51	527.133	779.363	860.562	612.319	584.766	844.108	1191.4	1289.91	784.337	685.883	1108.47	259.726	151.903	234.184	1.14354	-1.41326	-1.61612
2354	0.151327	9.04	23.995				2817.39	2604.46	2268.18	2878.03	1857.37	1732.25	2430.28	3369.04	3981.12	2563.35	2155.88	3260.15	276.907	628.516	781.131	1.189	-1.27183	-1.51221
1394	0.151756	7.81	45.618				4710.88	4261.15	2729.57	4187.29	4992.64	5275.93	2954.45	4020.09	2841.12	3900.53	4818.62	3271.89	1038.72	564.798	650.438	-1.23537	1.19214	1.47273
1037	0.153436	5.89	61.474				15511.3	23761.5	23744.5	13702.6	18970.5	28358.8	16153.3	7814.18	12833.1	21005.8	20344	12266.8	4758.34	7424.01	4198.28	1.03253	1.7124	1.65845
751	0.1564	6.72	74.44				424.457	463.226	286.456	489.904	244.418	427.932	569.956	607.408	543.164	391.38	387.418	573.51	92.9109	127.659	32.2687	1.01023	-1.46535	-1.48034
810	0.156649	7.54	71.922				3745.87	3087.68	3029.95	2323.4	2600.57	3525.84	3047.49	1782.53	1059.55	3287.83	2816.6	1963.19	397.722	629.656	1006.21	1.1673	1.67474	1.43471
2009	0.15779	4.83	30.03				1518.67	698.047	1346.21	852.141	1116.91	1251.42	1546.32	1674.77	1832.07	1187.64	1073.49	1684.39	432.68	203.15	143.12	1.10634	-1.41826	-1.56908
4474	0.159867	8.7	19.522				911.116	1876.4	1371.92	2850.84	1902.48	2455.2	882.551	2203.61	590.925	1386.48	2402.84	1225.7	482.804	476.345	859.361	-1.73305	1.13118	1.96039
3970	0.160276	5.04	74.534				4238.48	4257.04	4444.46	5839.89	4916.92	5217.21	5114.08	2517.95	3642.1	4313.33	5324.67	3758.04	113.941	470.78	1301.94	-1.23447	1.14776	1.41687
1253	0.160418	8.54	50.093				67358.8	54744	53373.3	77421.7	62551	73085.2	69852.6	60541.2	71516.3	58492	71019.3	67303.4	7709.33	7647.56	5915	-1.21417	-1.15064	1.05521
1753	0.160778	7.47	35.06				66935.8	63968.9	60279.8	65396.9	66812	66810	51926.2	52699.2	66923.4	63728.2	66339.6	57183	3334.5	816.439	8444.34	-1.04098	1.11446	1.16013
3920	0.161526	6.64	94.683				362.77	150.45	295.674	345.409	396.038	532.272	604.422	414.903	346.773	269.631	424.573	455.366	108.529	96.6445	133.505	-1.57464	-1.68885	-1.07253
3759	0.161928	4.84	48.393				1300.38	1105.68	865.775	992.105	871.927	905.457	1375.91	1013.91	1329.29	1090.61	923.163	1239.7	217.696	62.0143	196.929	1.18139	-1.1367	-1.34289
3240	0.162199	5.45	16.059				2366.69	1992.61	2139.52	2426.95	3038.18	3617.58	4396.13	2858.14	2403.91	2166.27	3027.57	3219.39	188.472	595.386	1044.09	-1.39759	-1.48614	-1.06336
1690	0.162374	7.8	36.081				13751.6	15777.5	13206.3	12189.3	15554.2	12726.6	14864.8	20538.8	16015	14245.2	13490	17139.5	1354.77	1807.71	2999.53	1.05598	-1.20318	-1.27054
262	0.162711	5.36	128.281				9991.17	14781.6	14721.4	8866.55	12664.2	12754.4	12120.6	6183.99	6679.1	13164.7	11428.4	8327.9	2748.55	2219.07	3293.89	1.15193	1.5808	1.3723
2149	0.163528	4.97	27.502				1968.78	931.976	1809.09	1985.47	3234.66	2136.71	2215.09	2102.95	2681.04	1569.95	2452.28	2333.03	558.243	681.771	306.557	-1.56201	-1.48605	1.05112
4102	0.167237	4.73	49.075				2195.98	1634.82	1843.29	1326.2	1690.33	1461.06	1833.96	1570.16	1431.88	1891.36	1492.53	1612	283.651	184.094	204.28	1.26721	1.1733	-1.08004
1113	0.168021	5.23	57.276				4108.37	3109.47	3223.37	3902.91	3870.86	4945.45	4343.14	3862.13	4385.36	3480.4	4239.74	4196.87	546.808	611.374	290.668	-1.21817	-1.20586	1.01021
1935	0.168282	6.37	31.46				1017.35	800.712	799.825	880.163	639.775	758.223	904.465	923.834	1397.65	872.629	759.387	1075.32	125.331	120.198	279.316	1.14912	-1.23227	-1.41603
3870	0.168392	8.62	42.502				8276.96	9113.08	5286.2	11569.4	11117.8	8855.64	4490.79	8456.22	7430.54	7558.75	10514.3	6792.52	2012	1454.07	2058.27	-1.39101	1.1128	1.54792
1148	0.168609	7.54	55.97				10217.9	7124.11	6400.18	7331.36	8205.3	9332.05	11171.9	10507.9	9327.25	7914.07	8289.57	10335.7	2027.76	1003	934.311	-1.04745	-1.30599	-1.24683
1313	0.168648	7.25	48.199				27894.4	25503.7	20972	26649.4	26197.8	29146.4	23079.6	20969.6	24432.4	24790	27331.2	22827.2	3515.99	1588.14	1745.18	-1.10251	1.08599	1.19731
4003	0.170934	8.29	115.385				4604.71	7631.28	9749.73	5571.77	12718.3	11071.5	4651.71	4959.46	5466.7	7328.57	9787.22	5025.96	2585.83	3742.38	411.54	-1.33549	1.45814	1.94733
4027	0.171561	7.07	99.095				1406.99	1443.85	1531.03	2092.6	2426.91	2280.8	2408.53	770.233	1059.02	1460.63	2266.77	1412.6	63.6993	167.597	874.51	-1.55192	1.034	1.60468
4420	0.17208	8.97	36.796				52514.9	30192	43882.1	32159.7	30505.2	14048	33940	41575.5	35518.8	42196.3	25571	37011.4	11256.5	10013.4	4030.7	1.65016	1.14009	-1.4474
498	0.172104	8.15	108.937				660.209	710.924	968.604	668.914	556.055	449.798	574.926	448.128	697.423	779.912	558.256	573.492	165.368	109.575	124.654	1.39705	1.35994	-1.02729
731	0.172573	7.11	75.679				667.053	749.317	408.777	388.529	360.943	532.518	691.348	522.25	673.79	608.382	427.33	629.13	177.689	92.1338	92.9754	1.42368	-1.0341	-1.47223
861	0.172773	6.61	69.59				1432.87	1135.6	1075.42	1280.29	1218.32	1393.25	1297.49	802.271	807.54	1214.63	1297.29	969.1	191.379	88.6952	284.406	-1.06805	1.25336	1.33865
4466	0.175562	8.95	76.357				28382.4	26423.5	35020.1	39554.7	45747.7	23037.7	25256.8	24887.8	17212.6	29942	36113.4	22452.4	4505.5	11739.6	4541.56	-1.20611	1.33358	1.60844
3571	0.176771	7.96	13.754				54195	69346.6	55235.6	66296.5	60072	72002.7	55226	58350.8	52838.2	59592.4	66123.8	55471.7	8463.37	5967.23	2764.49	-1.1096	1.07429	1.19203
1597	0.17686	7.89	38.607				43366.3	41454.6	27092.8	42910	44543.5	45003.5	48868.8	52841.9	43480.4	37304.6	44152.3	48397	8895.15	1100.18	4698.57	-1.18356	-1.29735	-1.09614
1962	0.177078	7.35	31.102				1999.67	2580.92	2960.01	3421.68	2804.45	2335.77	1862.68	1897.91	2438.58	2513.53	2853.97	2066.39	483.701	544.646	322.809	-1.13544	1.21639	1.38114
1177	0.178298	5.93	54.478				4031.06	3500.34	3387.39	3493.83	3265.11	3839.78	3332.31	3176.06	3105.63	3639.59	3532.91	3204.67	343.688	289.325	116.015	1.0302	1.13572	1.10243
4046	0.17915	7.56	41.528				19343.6	15627.6	13856.4	17883.7	39803.3	21701.9	16367.6	18679.2	17520	16275.8	26463	17522.3	2800.44	11709.7	1155.77	-1.62591	-1.07658	1.51025
4294	0.179867	4.7	17.752				960.431	1075.3	1295.15	938.945	1082.78	1148.37	1642.41	1060.29	1587.33	1110.29	1056.7	1430.01	170.08	107.122	321.368	1.05072	-1.28795	-1.35328
1152	0.181693	5.86	55.597				1563.27	1554.65	1567.27	1107.24	1405.39	1768.29	1748.93	1669.51	2052.61	1561.73	1426.97	1823.68	6.45031	331.052	202.19	1.09444	-1.16773	-1.27801
2429	0.182569	6.73	22.538				4073.55	3737.93	3767.61	3414.98	2945.18	4347.66	5136.45	5035.51	3752.55	3859.69	3569.27	4641.5	185.794	713.856	771.51	1.08137	-1.20256	-1.30041
1909	0.184205	7.13	31.97				4565.24	4364.99	2677.58	3646.56	3634.02	5268.22	5030.19	5041.93	6615.03	3869.27	4182.93	5562.39	1036.88	939.907	911.638	-1.08106	-1.43758	-1.32978
2037	0.184434	4.79	29.443				3471.64	1667.42	2808.26	2858.64	4879.74	3179.04	3589.17	3936.88	5206.76	2649.1	3639.14	4244.27	912.578	1086.27	851.478	-1.37372	-1.60215	-1.16628
4281	0.186099	8.47	33.068				110225	102079	66792.2	166851	114244	116299	98539.7	117548	120855	93032.2	132465	112314	23086.6	29797.1	12043.2	-1.42386	-1.20726	1.17941
2279	0.18843	5.54	25.204				6446.66	7070.51	6142.55	6724.24	8190.67	8161.02	8089.57	6656.85	7472.32	6553.24	7691.98	7406.25	473.073	838.214	718.641	-1.17377	-1.13017	1.03858
2448	0.19036	7.12	22.111				2263.07	2601.86	1329.8	1442.42	2178.89	2619.21	3623.11	3050.49	2606.33	2064.91	2080.17	3093.31	658.772	594.573	509.74	-1.00739	-1.49803	-1.48704
4298	0.1911	5.89	59.049				2317.8	2411.02	2273.75	1428.33	1900.47	2301	2807.26	1944.99	2979.32	2334.19	1876.6	2577.19	70.085	436.826	554.218	1.24384	-1.1041	-1.37333
1845	0.19178	7.1	33.17				10128	7913.54	7951.06	6658.1	6127.62	8067.6	7105.61	8649.67	8734.52	8664.19	6951.11	8163.27	1267.81	1002.63	916.936	1.24645	1.06136	-1.17438
3961	0.191835	7.11	99.434				2482.12	2998.47	2753.4	3567.13	3651.16	3824.14	3893.22	1616.21	2006.36	2744.66	3680.81	2505.26	258.284	131.041	1217.73	-1.34108	1.09556	1.46923
1415	0.191939	6.28	45.082				5078.46	6914.66	7415.3	3941.27	1569.26	5489.06	4600.27	3455.57	4387.06	6469.47	3666.53	4147.63	1230.39	1974.29	608.752	1.76447	1.5598	-1.13121
1709	0.192216	5.49	35.698				1062.93	727.394	870.829	729.147	916.811	941.992	1023.52	991.817	1354.48	887.05	862.65	1123.27	168.353	116.3	200.859	1.02828	-1.2663	-1.30212
1123	0.193299	5.67	56.903				5285.11	5983.23	5100.74	5561.93	5891.86	6812.66	7519.1	5506	7683.01	5456.36	6088.82	6902.7	465.5	648.211	1212.36	-1.11591	-1.26508	-1.13367
1134	0.197193	5.93	56.53				3968.07	2930.84	4431.62	2557.19	2812.86	4354.39	5835.9	3590.66	5394.12	3776.85	3241.48	4940.23	768.449	972.251	1189.45	1.16516	-1.30803	-1.52406
1463	0.197999	4.84	43.086				8924.4	6983.16	7314.03	5939.93	6448.02	7052.63	8000.76	6591.66	8197.05	7740.53	6480.19	7596.49	1038.52	557.049	875.73	1.19449	1.01896	-1.17226
1948	0.199648	6.79	31.332				1662.05	1419.37	1829.78	1884.65	1524.49	2347.88	2339.12	2030.78	1976.14	1637.07	1919.01	2115.35	206.346	412.769	195.71	-1.17222	-1.29216	-1.10231
1787	0.202662	7.09	34.421				1641.59	2063.71	1128.9	977.459	1563.52	1422.92	1795.41	1978.94	1934.29	1611.4	1321.3	1902.88	468.134	305.962	95.7161	1.21956	-1.18089	-1.44016
513	0.202768	5.58	106.222				1115.35	924.033	816.654	604.984	675.576	944.81	958.224	831.419	952.429	952.011	741.79	914.024	151.298	179.328	71.5966	1.2834	1.04156	-1.23219
959	0.203067	8.19	65.672				1649.18	1019.17	995.873	1030.88	617.564	944.067	1679.72	1096.17	1142.52	1221.41	864.171	1306.13	370.642	217.934	324.362	1.41339	-1.06937	-1.51143
503	0.203454	4.92	108.597				622.973	486.158	543.551	344.436	540.038	399.832	498.168	411.493	313.891	550.894	428.102	407.851	68.7023	100.819	92.1923	1.28683	1.35073	1.04965
575	0.204264	6.47	99.095				4418.27	3947.8	4739.49	4841.95	4059.84	5724.53	5445.04	1981.98	1895.58	4368.52	4875.44	3107.53	398.183	832.849	2024.8	-1.11604	1.40579	1.56891
1801	0.207009	7.88	34.089				68246.7	70533.8	49730	70077	62893.3	56559.1	50385	41073.8	58390.2	62836.8	63176.5	49949.7	11408.3	6763.38	8666.44	-1.0054	1.258	1.2648
2502	0.208346	7.52	21.281				4749.88	4971.37	4306.21	6375.99	3944.71	2865.96	4967.51	7320.72	7169.02	4675.82	4395.55	6485.75	338.709	1797.92	1317.02	1.06376	-1.38708	-1.47552
606	0.208409	6.82	94.005				576.966	650.683	709.128	526.449	472.304	534.362	654.141	347.538	456.27	645.592	511.038	485.983	66.2279	33.7774	155.446	1.2633	1.32843	1.05156
4069	0.211731	7.92	50.84				22222	21176.8	15921.3	21192.8	20087.2	30753.5	18171.2	18154.6	17418.5	19773.4	24011.2	17914.8	3376.67	5865.16	429.849	-1.21432	1.10375	1.3403
1419	0.215742	5.89	45.034				30264.6	30182.2	30341.3	21633.9	23507.3	31837.5	29855.5	29173.8	29156.9	30262.7	25659.6	29395.4	79.564	5431.61	398.535	1.17939	1.0295	-1.14559
1641	0.216105	5.51	36.949				3137.89	2385.21	1917.13	2707.54	3433.15	3216.64	3228.99	2747.96	3212.78	2480.08	3119.11	3063.24	615.888	372.505	273.16	-1.25767	-1.23514	1.01824
2097	0.219667	8.69	28.37				16051.2	17483.4	12627.3	21396.7	18211.6	15766.9	12122.5	15919.2	15323.4	15387.3	18458.4	14455.1	2495.17	2823	2041.89	-1.19959	1.06449	1.27695
2036	0.220029	5	29.468				1020.94	1263.94	1068.43	839.812	1146.16	814.629	1064.75	1096.63	1563.45	1117.77	933.535	1241.61	128.795	184.573	279.179	1.19735	-1.11079	-1.33001
4150	0.220161	5.56	49.026				1224.33	1381.57	1598.14	1410.86	2862.37	1437.8	4245	1494.67	2805.53	1401.35	1903.67	2848.4	187.692	830.362	1375.67	-1.35846	-2.03261	-1.49626
1828	0.221455	4.75	33.477				806.646	464.026	936.27	838.897	717.814	996.678	1095.25	1330.76	863.916	735.647	851.13	1096.64	243.997	139.834	233.423	-1.15698	-1.49072	-1.28845
1120	0.221591	6.76	56.996				3301.78	3344.07	2842.64	3401.18	3472.06	5132.68	3221.44	3391.44	3241.13	3162.83	4001.97	3284.67	278.098	979.86	92.9907	-1.26531	-1.03852	1.21838
1486	0.222254	5.52	42.307				4171.92	2852.83	3761.12	3554.98	3447.46	3948.71	5264.61	3736.06	4540.1	3595.29	3650.38	4513.59	674.995	263.891	764.619	-1.01532	-1.25542	-1.23647
1173	0.222748	7.66	54.757				27605	24076.1	23330.8	30131.2	23981	31312.9	28298.3	31655.8	28101.3	25004	28475	29351.8	2283.15	3936.51	1997.75	-1.13882	-1.17389	-1.03079
1500	0.22319	7.29	41.966				6717.7	7896.99	6860.02	7186.33	8204.43	9729.09	7682.54	8605.97	8663.56	7158.24	8373.28	8317.36	643.725	1279.76	550.52	-1.16974	-1.16193	1.00672
1093	0.224321	6.64	58.769				1726.06	877.494	1199.82	1337.98	1212.36	1498.32	2095.17	1396.1	1879.69	1267.79	1349.55	1790.32	428.35	143.331	357.999	-1.06449	-1.41215	-1.3266
579	0.225448	6.57	98.416				2053.09	2216.72	2208.05	1559.66	1622.29	2509.13	2299.98	950.072	998.9	2159.29	1897.03	1416.32	92.0717	531.025	765.662	1.13825	1.52458	1.33941
1511	0.226877	4.7	41.479				743.348	514.07	649.307	893.466	972.136	647.752	719.309	655.444	772.019	635.575	837.785	715.591	115.254	169.208	58.3768	-1.31815	-1.1259	1.17076
2287	0.227016	7.65	25.153				9582.24	10398.6	14307.4	8909.11	7808.81	12185.1	14382.4	13988.6	10960.8	11429.4	9634.34	13110.6	2525.6	2276.49	1872.16	1.18632	-1.14709	-1.36082
1721	0.227236	6.76	35.57				2338.25	1650.15	2368.22	2389.9	1758.52	2460.83	2556.53	2850.84	2606.24	2118.87	2203.08	2671.2	406.203	386.635	157.547	-1.03974	-1.26067	-1.21248
1176	0.228387	5.16	54.478				2230.74	1357.95	1520.63	1407.85	1876.5	1669.49	1140.42	1250.92	1460.88	1703.11	1651.28	1284.07	464.124	234.856	162.785	1.03139	1.32633	1.28597
3997	0.228534	5.97	15.853				1333.98	1137.14	1177.96	1477.24	1469.5	1176.49	1614.75	1232.43	1704.44	1216.36	1374.41	1517.21	103.885	171.45	250.666	-1.12994	-1.24734	-1.1039
3884	0.23077	9.32	41.869				26944.4	24350.6	29865	33516.2	17538.7	3636.06	27971.2	37202.3	48317.4	27053.3	18230.3	37830.3	2758.78	14952.1	10187.6	1.48397	-1.39836	-2.07513
3992	0.230854	7.73	31.383				65857	69332.9	55143.5	70997.7	76036	61913.8	49971.5	59845.7	63836.2	63444.5	69649.2	57884.4	7395.92	7157.05	7137.37	-1.0978	1.09605	1.20324
1640	0.233491	7.68	36.974				55297.8	49442.7	43478.8	53019.9	62027.5	53243.6	52347.7	63117.3	56209.5	49406.5	56097	57224.8	5909.57	5137.19	5456.12	-1.13542	-1.15825	-1.02011
1997	0.236495	4.42	30.336				3091.17	1450.36	1820.78	2614.29	2792.25	1849.33	3052.87	2636.34	3676.07	2120.77	2418.62	3121.76	860.558	500.986	523.279	-1.14045	-1.47199	-1.29072
899	0.237319	6.14	68.097				918.447	936.743	886.968	891.898	791.114	1066	1375.01	1053.98	937.886	914.053	916.338	1122.29	25.1766	139.065	226.424	-1.0025	-1.22782	-1.22476
4283	0.237531	7.32	11.667				36674.1	66431.9	74025.6	36030.3	47995.6	59490.7	38127.1	34929.9	39105.9	59043.9	47838.9	37387.7	19741.4	11731	2184	1.23422	1.57923	1.27954
1204	0.237672	7.84	53.078				2626.6	2652.29	1247.97	2919.88	3148.05	2789.03	2503.59	3091.92	3335.26	2175.62	2952.32	2976.92	803.47	181.696	427.597	-1.357	-1.36831	-1.00833
3900	0.238557	6.82	99.774				2251.88	2670.84	2913.34	2888.61	3108.69	4110.69	3381.47	2034	2126.89	2612.02	3369.33	2514.12	334.632	651.399	752.581	-1.28993	1.03894	1.34016
1473	0.241583	4.93	42.697				23677.6	19683.3	20905.7	14529.4	18088.7	20183.6	19263.1	16408	20919.8	21422.2	17600.6	18863.6	2046.64	2858.53	2282.27	1.21713	1.13563	-1.07176
1317	0.24466	8.29	48.101				1276.85	1249.53	858.374	1475.52	1125.71	880.719	1489.45	1457.53	1438.51	1128.25	1160.65	1461.83	234.12	298.934	25.7417	-1.02871	-1.29566	-1.2595
1651	0.24723	6.91	36.745				3849.37	3773.76	3950.71	4806.56	3871.88	6102.31	5402.25	8105.41	4001.02	3857.95	4926.92	5836.22	88.7881	1120.07	2086.33	-1.27708	-1.51278	-1.18456
3909	0.247569	5.08	74.067				8093.19	6869.64	8098.88	8016.19	8384.03	9246.35	8383.35	5778.11	7110.76	7687.24	8548.86	7090.74	708.065	631.426	1302.73	-1.11208	1.08412	1.20564
3958	0.249537	7.16	99.774				1060.04	1072.61	975.433	1375.77	1547.24	1522.37	1692.73	641.665	879.291	1036.03	1481.79	1071.23	52.8505	92.6551	551.193	-1.43026	-1.03398	1.38326
640	0.249907	6.44	88.575				2533.26	2646.71	2806.58	2601.61	2311.34	2776.4	2989.03	1644.36	1408.69	2662.19	2563.12	2014.02	137.318	234.907	852.56	1.03865	1.32182	1.27264
1988	0.252387	4.51	30.668				6992.82	7583.91	6169.01	6745.71	13081.7	9149.38	8904.32	7869.43	10132.6	6915.25	9658.92	8968.78	710.635	3198.56	1132.96	-1.39676	-1.29696	1.07695
2000	0.252754	4.66	30.234				8740.6	3992.77	9464.12	8393.68	9011.02	9446.05	9566.41	10423.6	12197.3	7399.17	8950.25	10729.1	2972.12	528.815	1341.81	-1.20963	-1.45004	-1.19875
3911	0.253739	8.33	39.386				69941	61055.6	76121.3	92532.6	127111	77418.8	50335.5	95563.5	76669.1	69039.3	99020.8	74189.3	7573.23	25473.5	22715.8	-1.43427	-1.0746	1.3347
1026	0.255371	5.76	62.313				13449.7	16909.1	17894.8	12411.2	10731.2	19547.3	12575.6	8280.34	12828.8	16084.5	14229.9	11228.2	2334.41	4680.99	2556.09	1.13033	1.43251	1.26733
1252	0.25539	8.28	50.093				51960.9	41480.8	34955.1	53357.5	42943	52547.1	42246.1	39580.1	40144.6	42799	49615.9	40656.9	8579.19	5793.08	1404.88	-1.15928	1.05269	1.22036
544	0.256135	6.58	101.131				2890.53	2254.83	1889.2	2692.97	2420.15	3239.23	2806.05	1416.47	1668.25	2344.85	2784.12	1963.59	506.697	417.078	740.375	-1.18733	1.19417	1.41787
4121	0.26181	8.99	25.23				23647	16726.1	22122.6	26404.4	19728	15522.3	12358.5	16712.8	17553.7	20831.9	20551.6	15541.7	3636.53	5487.6	2788.61	1.01364	1.34039	1.32235
3380	0.262681	4.7	15.375				6862.2	6028.99	7546.49	6297.81	9740.17	7619.22	7306.19	10081.2	9140.96	6812.56	7885.73	8842.78	759.965	1736.59	1411.33	-1.15753	-1.29801	-1.12136
3200	0.263636	5.37	16.318				17285.3	15558.1	14752.2	18152.8	15375.9	20676.4	19419.5	17310.3	18017.1	15865.2	18068.4	18249	1294.17	2651.22	1073.52	-1.13887	-1.15025	-1.01
2895	0.26783	7.77	17.92				4507.86	4953.16	4098.82	6044.22	4855.56	6369.58	4116.79	6269.94	4368.48	4519.95	5756.46	4918.4	427.298	796.979	1177.21	-1.27357	-1.08815	1.17039
4111	0.268591	7.07	44.693				6742.21	6326.06	7411.89	7435.26	7485.74	10514.7	7788.21	5217.05	7102.7	6826.72	8478.57	6702.65	547.826	1763.53	1331.44	-1.24197	1.01851	1.26496
753	0.269117	5.69	74.347				907.626	1034.92	817.99	790.254	629.924	869.025	931.961	355.554	607.358	920.178	763.068	631.624	109.007	121.847	288.969	1.20589	1.45684	1.2081
4402	0.269571	8.41	34.702				46317.8	49232.2	34581.8	46602.9	19930.2	28443.1	42889.7	42079.5	39040.8	43377.3	31658.7	41336.7	7755.22	13624	2029.15	1.37015	1.04937	-1.3057
1040	0.269677	6.89	61.381				997.597	1696.39	1524.44	1097.83	845.375	1355.65	1172.89	829.434	963.592	1406.14	1099.62	988.637	364.106	255.142	173.091	1.27875	1.4223	1.11226
785	0.27031	7.54	73.041				3160.53	2448.76	1920.45	1919.06	1805.75	2460.15	2295.34	1693.41	796.662	2509.91	2061.65	1595.14	622.297	349.723	754.158	1.21743	1.57348	1.29246
2359	0.271755	7.59	23.92				9424.97	8212.17	7268.99	5327.66	6129.31	9131.16	8720.01	8284.16	8521.79	8302.05	6862.71	8508.65	1080.8	2005.01	218.219	1.20973	-1.02489	-1.23984
1799	0.271818	5.22	34.089				2322.51	3029.79	2515.16	1871.31	1858.83	2641.24	2419.56	2045.31	2367.89	2622.48	2123.79	2277.59	365.65	448.168	202.81	1.23481	1.15143	-1.07242
2498	0.2757	9.32	21.407				7904.74	4218.19	5060.02	9746.56	7223.22	4451.11	1933.32	4933.41	5074.84	5727.65	7140.3	3980.52	1931.83	2648.7	1774.34	-1.24664	1.43892	1.79381
1615	0.280866	7.28	37.779				4490.23	5230.13	4758.72	4160.03	6183.57	5581.84	6634.22	7028.17	4926.51	4826.36	5308.48	6196.3	374.559	1039.1	1117.17	-1.09989	-1.28385	-1.16725
4442	0.282146	8.32	67.444				21586.4	17501.1	15840.5	15671.4	3968.72	15084	18421.1	15393.2	16582.9	18309.3	11574.7	16799.1	2957	6593.54	1525.48	1.58184	1.0899	-1.45136
750	0.283901	6.48	74.44				939.552	802.086	1040.27	1006.67	662.467	894.213	831.433	708.172	670.665	927.301	854.449	736.757	119.562	175.512	84.1094	1.08526	1.25863	1.15974
3979	0.285608	5.65	45.521				12256.7	14257.7	13993.2	11795.8	9909.09	17105.9	17446.3	14719	16182.6	13502.5	12936.9	16115.9	1087.01	3731.62	1364.87	1.04372	-1.19355	-1.24573
3342	0.28687	7.51	15.581				2851.11	2614.58	1839.75	3332.03	3065.1	3479.93	3455.09	3757.4	2104.42	2435.15	3292.35	3105.64	529.014	210.241	880.158	-1.35201	-1.27534	1.06012
2238	0.288177	6.83	25.868				1867.48	1476.1	1409.15	2038.26	1556.84	1895.53	2048.61	1957.11	1668.57	1584.24	1830.21	1891.43	247.562	247.268	198.349	-1.15526	-1.1939	-1.03345
4437	0.289198	8.39	67.91				5534.56	3366.56	3164.18	2913.89	1574.9	3225.21	5464.06	3614.67	2625.05	4021.76	2571.33	3901.26	1314.02	876.859	1441.04	1.56408	1.03089	-1.51721
793	0.292002	5.22	72.575				1026.02	766.15	890.599	522.855	654.106	946.94	1089.33	805.759	835.276	894.257	707.967	910.123	129.974	217.112	155.901	1.26313	-1.01774	-1.28555
1170	0.292609	7.78	54.851				18941.4	15543.3	12670.4	18351.2	16590.2	21379.5	14760.2	15812.2	16958.9	15718.4	18773.7	15843.8	3139.15	2422.43	1099.66	-1.19438	-1.00798	1.18492
1410	0.293007	5.19	45.131				3318.45	3014.63	2538.37	3113.4	3811.7	3298.81	3138.11	3202.39	3635.36	2957.15	3407.97	3325.29	393.204	361.72	270.448	-1.15245	-1.12449	1.02487
1420	0.295857	6.76	45.034				3838.59	3103.67	3956.79	3330.87	2974.51	3644.25	3478.21	2433.13	3051.27	3633.02	3316.54	2987.54	462.22	335.099	525.446	1.09542	1.21606	1.11013
2080	0.296594	4.48	28.651				4090.59	1473.46	2996.74	2909.47	5565.02	3812.24	3974.03	4208.09	4283.7	2853.59	4095.57	4155.27	1314.43	1350.26	161.453	-1.43523	-1.45615	-1.01458
1199	0.297359	6.43	53.545				3090.86	2631.62	3712.74	4842.5	3250.71	3056.12	2675.7	2466.4	3233	3145.07	3716.45	2791.7	542.594	980.037	396.247	-1.18167	1.12658	1.33125
2041	0.298062	5.98	29.417				1353.68	973.545	938.309	815.499	1252.37	967.092	1359.42	1132.76	1352.08	1088.51	1011.65	1281.42	230.319	221.816	128.791	1.07597	-1.17722	-1.26666
4370	0.298354	8.7	30.566				32303.3	33758.7	23719.9	45964.5	42925.5	27447.8	22458	24395.7	36287.8	29927.3	38779.3	27713.8	5424.79	9930.32	7488.21	-1.29578	1.07987	1.39928
1156	0.299465	5.41	55.41				1420.89	1100.08	1091.45	1132	989.245	1264.84	1434.2	1235.35	1319.71	1204.14	1128.69	1329.75	187.761	137.827	99.8058	1.06684	-1.10431	-1.17813
3976	0.299854	6.64	42.404				1988.22	1659.61	1681.76	1340.68	1534.38	1791.11	1715.62	1676.68	2185.99	1776.53	1555.39	1859.43	183.665	225.945	283.48	1.14218	-1.04666	-1.19548
1981	0.300979	4.99	30.745				725.776	426.1	797.81	823.24	758.298	631.348	797.328	810.182	957.653	649.895	737.629	855.054	197.131	97.6012	89.0853	-1.135	-1.31568	-1.15919
2443	0.30298	5.38	22.211				790.674	928.517	1065.33	966.09	1271.5	940.196	970.629	874.669	627.465	928.175	1059.26	824.254	137.33	184.26	177.05	-1.14123	1.12608	1.28512
4339	0.303372	6.7	100.452				2066.53	2251.34	2317.92	2053.92	2145.89	2883.02	2801.69	2575.02	2439.58	2211.93	2360.95	2605.43	130.245	454.462	182.962	-1.06737	-1.1779	-1.10355
609	0.303501	5.05	92.986				1040.06	856.558	1174.75	602.214	1146.91	874.826	788.307	687.318	795.991	1023.79	874.649	757.205	159.719	272.347	60.6459	1.17052	1.35206	1.1551
4218	0.305403	8.57	30.54				11970.4	5763.32	6283.39	15903.4	12645.6	7406.29	9571.3	13684.8	11223.1	8005.72	11985.1	11493.1	3443.38	4286.87	2069.97	-1.49707	-1.43561	1.04281
1509	0.305625	7.8	41.528				8410.33	8124.53	6658.61	8730.02	13480.4	8501.74	8863.74	10730.1	7791.57	7731.16	10237.4	9128.48	939.784	2810.85	1487.07	-1.32417	-1.18074	1.12148
3923	0.305825	4.92	114.706				1029.58	1065.55	1373.75	907.465	1068.74	1142.6	1122.3	743.265	909.635	1156.29	1039.6	925.067	189.177	120.244	189.988	1.11225	1.24996	1.12381
1646	0.306759	5.74	36.821				3544.07	2634.86	3724.87	4151.93	3653.08	4217.52	4452.58	3201.34	3799.64	3301.26	4007.51	3817.86	584.163	308.691	625.819	-1.21393	-1.15648	1.04968
515	0.306866	4.62	105.882				1119.68	808.883	1011.08	1034.02	1252.8	1160.66	880.532	1152.72	833.25	979.883	1149.16	955.501	157.731	109.843	172.426	-1.17275	1.02552	1.20268
2126	0.308029	4.81	27.86				1661.8	1544.42	1810.51	1713.7	1461.43	1198.66	1538.23	1787.17	1690.89	1672.24	1457.93	1672.09	133.355	257.541	125.527	1.147	1.00009	-1.1469
1747	0.308472	3.96	35.111				1478.87	1295.69	1910.95	1370.15	1961.58	2091.78	2233.04	1656.48	2307.72	1561.84	1807.84	2065.75	315.906	384.593	356.4	-1.15751	-1.32264	-1.14266
1251	0.309566	6.03	50.093				1695.88	2279.44	1844.95	1792.72	1455.5	2114.92	3324.26	2336.58	1779.52	1940.09	1787.71	2480.12	303.187	329.738	782.306	1.08524	-1.27835	-1.38731
2068	0.310789	4.08	28.881				1656.01	1136.92	1425.99	1525.4	1917.61	1478.75	1574.28	1583.94	2184.47	1406.31	1640.59	1780.9	260.101	241.042	349.54	-1.16659	-1.26636	-1.08552
1437	0.312091	7.37	44.352				5427.45	5464.24	4188.4	4615.9	4617.95	4244.35	4376.68	4473.12	4505.49	5026.69	4492.73	4451.76	726.217	215.109	67.0057	1.11885	1.12915	1.0092
1162	0.314565	5.63	55.037				4240.5	5069.15	4269.1	3134.69	3223.37	4202.33	4349.64	2566.47	4216.62	4526.25	3520.13	3710.91	470.383	592.468	993.342	1.28582	1.21971	-1.0542
3963	0.31497	7.15	106.222				314.346	356.219	378.882	325.281	261.681	221.192	456.984	241.53	380.63	349.816	269.385	359.714	32.7411	52.4704	109.239	1.29857	-1.0283	-1.33532
1096	0.314972	5.34	58.302				5075.85	3969.12	3466.34	2939.82	3212.36	3944.88	4197.24	5683.95	3444.08	4170.44	3365.69	4441.75	823.426	519.775	1139.78	1.23911	-1.06506	-1.31972
901	0.315096	8.18	68.097				10657.2	8377.6	7201.65	7472.99	7554.45	7317.38	10058.5	8421.26	8046.93	8745.5	7448.27	8842.22	1756.92	120.453	1069.81	1.17416	-1.01106	-1.18715
3966	0.317602	7.27	106.222				153.231	245.08	181.207	172.875	145.186	202.266	287.203	273.061	168.232	193.173	173.442	242.832	47.0792	28.544	64.9912	1.11376	-1.25707	-1.40007
847	0.320147	5.38	70.243				3884.28	3797.39	4561.27	3676.35	3921.5	4266.22	3274.07	3932.03	3675.83	4080.98	3954.69	3627.31	418.208	296.33	331.651	1.03193	1.12507	1.09025
770	0.321102	6.35	73.694				576.28	622.285	510.879	502.798	549.678	682.972	788.838	719.724	555.822	569.814	578.483	688.128	55.9839	93.4768	119.678	-1.01521	-1.20764	-1.18954
3836	0.321477	5.37	114.706				945.687	1076.34	792.213	588.359	672.856	883.96	1291.07	806.428	733.949	938.08	715.058	943.817	142.217	152.252	302.908	1.31189	-1.00611	-1.31992
1233	0.321841	7.19	51.213				2440.58	3098.46	2098.67	2225.02	2995.37	3435.22	3468.98	3236.6	2918.99	2545.91	2885.2	3208.19	508.148	612.577	276.092	-1.13327	-1.26014	-1.11195
4010	0.322602	6.39	98.756				3005.87	3595.41	4247.16	3306.37	3855.96	4568.05	4999.49	1618.4	1550.37	3616.15	3910.13	2722.75	620.906	632.583	1972.01	-1.0813	1.32812	1.43609
1175	0.322886	8.49	54.571				49737.5	40511.1	39039.9	62279	42542.1	50443.1	39550.8	43484.2	47934.3	43096.2	51754.7	43656.4	5798.4	9933.61	4194.4	-1.20091	-1.013	1.1855
3812	0.323696	4.78	34.6				571.131	429.31	387.975	355.291	514.03	454.278	570.331	515.491	526.369	462.805	441.2	537.397	96.0624	80.1739	29.0353	1.04897	-1.16117	-1.21804
2321	0.324	7.77	24.623				2732.73	3412.88	2943.15	4430.73	2522.9	3426.49	4158.74	4519.11	3274	3029.59	3460.04	3983.95	348.215	954.357	640.694	-1.14208	-1.31501	-1.15142
2849	0.329519	4.97	18.217				2894.62	3636.7	4081.68	3856.95	3389.21	3570.59	4706.32	3264.15	5857.19	3537.67	3605.58	4609.22	599.695	235.824	1299.25	-1.0192	-1.3029	-1.27836
1979	0.334043	4.43	30.821				2624.13	1828.05	2245.77	2207.64	4173.36	2300.3	3162.99	2739.12	3054.05	2232.65	2893.77	2985.38	398.199	1109.13	220.118	-1.29611	-1.33715	-1.03166
3892	0.337793	8.74	77.376				5913.68	11468.5	9469.9	5762.87	7269.45	6655.38	8134.51	6482.02	5923.17	8950.68	6562.57	6846.57	2813.56	757.565	1149.86	1.3639	1.30732	-1.04328
2252	0.33926	5.4	25.587				1400.9	1836.52	1539.96	1892.11	1802.97	2036.17	1895.34	1439.13	2131.18	1592.46	1910.42	1821.89	222.503	117.671	351.826	-1.19967	-1.14407	1.04859
1860	0.339873	4.95	32.915				655.976	183.662	544.408	316.784	393.831	371.921	634.31	491.291	713.644	461.349	360.845	613.081	246.869	39.6993	112.686	1.27852	-1.32889	-1.69902
1555	0.3443	5.97	39.678				2934.45	3800.41	3438.52	2919.2	1355.27	5064.73	4619.68	6357.53	3554.89	3391.13	3113.06	4844.03	434.924	1862.31	1414.73	1.08932	-1.42844	-1.55603
842	0.345487	6.03	70.429				1693.18	1533.78	2228.15	1414.85	1362.09	1748.24	1940.57	1116.35	1070.17	1818.37	1508.39	1375.7	363.723	209.382	489.737	1.2055	1.32178	1.09646
2368	0.346272	5.03	23.744				3924.02	2684.69	3110.43	1797.2	2924.9	2892.82	3435.05	2529.57	4196.93	3239.71	2538.31	3387.18	629.701	642.022	834.714	1.27633	-1.04552	-1.33443
2435	0.348481	6.54	22.437				2614.02	1948.67	3949.51	3062.39	4340.26	3829.27	2797.34	3362.93	3465.52	2837.4	3743.97	3208.6	1018.95	643.191	359.834	-1.31951	-1.13082	1.16686
4436	0.351089	8.16	56.25				5986.2	4542.46	3232.83	6406.04	5442.49	5125.19	4478.46	4798.33	4814.31	4587.16	5657.91	4697.03	1377.23	667.044	189.457	-1.23342	-1.02395	1.20457
2438	0.351843	7	22.387				2227.3	1541.03	2042.29	1263.29	1557.49	1798.87	1976.17	1384.23	1496.95	1936.87	1539.88	1619.12	355.072	268.225	314.312	1.25781	1.19625	-1.05145
3730	0.352963	8.42	18.152				2231.33	2248.99	1069.48	1669.9	1249.34	1357.94	1748.7	2724.98	1859.34	1849.93	1425.73	2111.01	675.954	218.321	534.584	1.29754	-1.14113	-1.48066
2069	0.353379	6	28.881				957.223	896.427	1128.46	829.524	901.126	805.773	936.182	836.331	1268.2	994.038	845.474	1013.57	120.32	49.6374	226.097	1.17572	-1.01965	-1.19882
2217	0.35392	7.23	26.123				13464	16036.9	10829.2	12273.5	12311	16971.1	17077.1	16802.5	14662.2	13443.4	13851.8	16180.6	2603.91	2701.4	1322.13	-1.03038	-1.20361	-1.16812
2439	0.354206	5.01	22.236				1231.47	1875.37	1693.52	1592.05	1581.49	1301.97	2679.33	1279.03	2666.97	1600.12	1491.83	2208.44	331.956	164.512	804.917	1.07259	-1.38017	-1.48035
3982	0.356172	5.63	97.738				855.669	870.222	1269.74	640.331	1031.07	663.62	1226.97	945.112	821.562	998.543	778.341	997.881	234.975	219.182	207.79	1.28291	1.00066	-1.28206
1497	0.358582	7.13	42.015				12896.5	10753.6	8387.47	10663.8	12226.6	15147.8	12572.3	12009	13527.3	10679.2	12679.4	12702.9	2255.43	2276.04	767.527	-1.1873	-1.1895	-1.00185
1144	0.360926	4.74	56.157				2764.29	1614.11	1913.93	2155.03	2311.54	2657.23	2083.09	3158.67	2921.84	2097.44	2374.6	2721.2	596.646	256.969	565.163	-1.13214	-1.29739	-1.14596
752	0.363928	8.76	74.44				3882.62	4918.59	2906.05	2431.95	3693.78	3451.18	4706.02	4584.31	3346.91	3902.42	3192.3	4212.41	1006.42	669.564	752.018	1.22245	-1.07944	-1.31955
1445	0.369797	9.1	43.768				12717.5	8085.62	11743.8	10194.3	11853.8	7116.08	10501.4	13123.5	14614.1	10849	9721.38	12746.3	2442.14	2404	2082.14	1.11599	-1.17489	-1.31116
641	0.369849	6.68	88.575				1121.11	926.712	778.594	1210.56	808.981	1542.08	1609.89	1215.67	1040.95	942.139	1187.21	1288.84	171.778	367.107	291.439	-1.26012	-1.36799	-1.0856
853	0.36994	5.94	69.963				1614.61	1326.55	1450.86	1217.41	1162.29	1758.41	2202.14	1415.09	1626.02	1464.01	1379.37	1747.75	144.481	329.411	407.4	1.06136	-1.19381	-1.26706
1298	0.375003	6.56	48.588				1206.43	809.904	986.113	795.4	893.208	973.935	1048.14	1122.98	968.114	1000.82	887.514	1046.41	198.674	89.4034	77.4455	1.12766	-1.04556	-1.17904
760	0.37624	9.22	74.16				1836.15	1293.41	943.916	2126.8	2613.88	1250.75	1419.52	1984.9	1629.73	1357.83	1997.14	1678.05	449.59	690.756	285.767	-1.47084	-1.23584	1.19016
2170	0.376276	4.61	27.043				1323.9	667.586	1411.4	1205.26	1392.09	1615.82	1351.9	1353.96	1710.3	1134.29	1404.39	1472.05	406.541	205.556	206.331	-1.23812	-1.29777	-1.04818
3935	0.377842	6.14	119.457				14898.8	13899.8	10333.5	12591	10124.4	10143.8	12591	10652.4	10349.7	13044.1	10953.1	11197.7	2399.93	1418.49	1216.07	1.1909	1.16489	-1.02233
1602	0.379482	7.04	38.412				2728.49	2472.24	2486.09	2692.09	1898	2615.95	2845.49	2714	2678.91	2562.27	2402.02	2746.13	144.116	438.146	87.8189	1.06672	-1.07176	-1.14326
734	0.38022	6.34	74.907				501.959	537.192	399.438	422.672	456.641	472.316	656.757	495.358	468.342	479.53	450.543	540.152	71.5635	25.3777	101.882	1.06434	-1.12642	-1.19889
3202	0.385923	5.83	16.305				15010.9	17111.5	15724.6	15919.9	18797.2	24374.4	20973.2	15207.2	16596.3	15949	19697.2	17592.2	1068.14	4298.52	3009.22	-1.23501	-1.10303	1.11965
3956	0.389882	7.2	99.774				1383.33	1807.62	1670.04	2038.75	1942.57	2300.87	2468.73	1139.81	1509.3	1620.33	2094.06	1705.95	216.468	185.445	685.937	-1.29237	-1.05284	1.22751
2483	0.390605	5.63	21.558				1828.52	2638.03	2412.86	2393.01	2886.12	2807.98	2585.48	2040.5	2518.18	2293.14	2695.7	2381.38	417.825	265.035	297.126	-1.17555	-1.03848	1.13199
2084	0.393037	4.41	28.6				2346.02	1479.15	2557.59	1720.99	2920.54	1689.54	2595.26	2291.06	3472.37	2127.59	2110.36	2786.23	571.443	701.813	613.374	1.00816	-1.30957	-1.32026
1943	0.395155	4.83	31.383				3009.19	815.026	2713.6	1857.78	2252.98	1790.99	2649.93	2746.49	3850.15	2179.27	1967.25	3082.19	1190.68	249.691	666.821	1.10777	-1.41432	-1.56675
4344	0.398725	6.89	115.724				1728.39	787.242	1819.71	752.822	1100.31	1379.66	1994.61	1237.85	1620.36	1445.11	1077.6	1617.61	571.56	314.035	378.388	1.34105	-1.11936	-1.50112
2389	0.398771	9.15	23.317				6314.58	4363.24	5648.51	8285.54	8374.43	4660.65	5599.39	8070.9	7868.89	5442.11	7106.87	7179.72	991.908	2118.96	1372.34	-1.3059	-1.31929	-1.01025
3738	0.400432	4.52	33.936				1002.63	799.793	1192.95	1013.53	1668.4	1231.68	1012.85	1447.68	1037.42	998.457	1304.53	1165.98	196.613	333.462	244.268	-1.30655	-1.16778	1.11883
4410	0.400856	9.16	30.77				20438.7	10561.8	15891.1	14492.9	19433.7	5804.81	8985.26	10025.1	8647.56	15630.5	13243.8	9219.31	4943.58	6899.77	717.977	1.18022	1.69541	1.43653
2341	0.405913	6.96	24.271				1896.59	1243.84	1531.76	1294.98	1552.12	1601.26	1518.73	2017.33	1810.36	1557.39	1482.79	1782.14	327.128	164.488	250.494	1.05032	-1.14431	-1.20189
3603	0.406038	7.25	13.182				22409	39573.3	20348	26276.8	37544.5	41468.5	32599.4	33475.5	33453	27443.4	35096.6	33176	10555.2	7886.15	499.454	-1.27887	-1.20889	1.05789
956	0.408622	5.46	65.765				2936.87	3983.13	3811.98	2932.33	3002.07	4121.47	3958.39	1933.86	2448.81	3577.32	3351.96	2780.35	561.215	667.33	1052.2	1.06723	1.28664	1.20559
904	0.412808	6.19	67.724				1571.96	1099.29	1263.62	1348.37	1019.96	1338.27	1481.61	1399.65	1440.36	1311.62	1235.53	1440.54	239.963	186.756	40.9759	1.06159	-1.09829	-1.16593
2372	0.413099	9.23	23.719				1071.14	708.128	1051.93	1454.96	1293.73	667.485	1166.16	1365.27	1348.76	943.733	1138.72	1293.4	204.266	415.992	110.499	-1.20662	-1.37051	-1.13583
1347	0.413642	4.81	47.079				6807.39	5779.4	6509.43	5366.49	5123.4	6755.11	5953.97	5838.22	5497.65	6365.41	5748.33	5763.28	528.912	880.326	237.211	1.10735	1.10448	-1.0026
1689	0.414896	6.47	36.081				734.489	640.82	681.726	515.494	557.081	718.891	792.033	568.63	713.635	685.678	597.155	691.433	46.9595	107.457	113.344	1.14824	-1.00839	-1.15788
1193	0.415864	5.16	53.731				2047.73	1856.27	1429.62	1599.74	1900.45	1847.07	2179.58	1726.74	2299.92	1777.87	1782.42	2068.74	316.426	160.444	302.237	-1.00256	-1.16361	-1.16064
1455	0.417328	6.57	43.33				3601.03	3235.65	3476.69	3621.49	3275.1	4741.33	3694.19	4089.54	3930.68	3437.79	3879.31	3904.8	185.77	766.364	198.942	-1.12843	-1.13585	-1.00657
1276	0.418031	6.72	49.416				1658.46	824.001	1180.36	1537.64	1310.73	1770.82	1113.31	1396.3	1366.68	1220.94	1539.73	1292.09	418.709	230.055	155.541	-1.2611	-1.05828	1.19166
3826	0.418621	5.05	66.418				3411.31	5518.35	7987.74	3518.84	2304.74	5608.01	4574.58	3161.21	3729.44	5639.13	3810.53	3821.74	2290.6	1670.84	711.193	1.47988	1.47554	-1.00294
2878	0.421501	9.25	18.062				18945.2	8812.77	13039.2	13137.2	10870.9	7726.51	5075.06	10762	11018.6	13599.1	10578.2	8951.88	5089.38	2717.22	3359.87	1.28557	1.51913	1.18168
3989	0.421838	5.86	41.674				6323.85	7484.99	5441.54	6642.07	6228.13	8679.74	8967.39	6407.59	8039.04	6416.79	7183.31	7804.67	1024.89	1312.37	1295.89	-1.11946	-1.21629	-1.0865
4034	0.422804	7.81	67.817				1368.99	1542.64	954.443	900.809	1171.82	1724.27	1624.34	2042.3	1295.46	1288.69	1265.63	1654.03	302.207	419.671	374.303	1.01822	-1.2835	-1.30688
4104	0.427253	6.24	41.869				2563.76	2397.48	2493.54	2282.43	2713.71	2702.06	3281.56	2496.36	2631.8	2484.93	2566.07	2803.24	83.475	245.704	419.737	-1.03265	-1.1281	-1.09243
3709	0.427276	9.07	11.852				31899.8	24749	24044.2	26698.5	25130.3	15388.5	16435	20993.6	25671	26897.7	22405.8	21033.2	4346.31	6127.48	4618.1	1.20048	1.27882	1.06526
2286	0.429415	7.48	25.153				8414.59	12284.6	10619	7199.79	8240.38	10619.2	10660	10934.3	8659.36	10439.4	8686.45	10084.5	1941.25	1752.79	1241.83	1.2018	1.03519	-1.16095
2647	0.431368	6.06	19.612				1951.93	1983.79	2912.04	2282.92	2123.73	1894.82	2741.98	2494.4	2252.03	2282.59	2100.49	2496.14	545.355	195.093	244.983	1.08669	-1.09356	-1.18836
1987	0.432085	8.28	30.694				31589.6	19659	24435.3	37041.5	35809	22729.8	29433.1	40091.7	26850.8	25228	31860.1	32125.2	6004.68	7931.06	7018.95	-1.26289	-1.2734	-1.00832
2347	0.433264	6.8	24.095				5302.16	3897.31	4155.01	3773.47	4220.81	4411.53	5027.39	4826.39	4284.31	4451.49	4135.27	4712.7	747.878	327.517	384.365	1.07647	-1.05868	-1.13964
1481	0.436657	6.59	42.453				985.596	916.829	956.324	921.496	895.351	1029.72	1009.96	668.564	868.38	952.916	948.856	848.968	34.5097	71.2409	171.524	1.00428	1.12244	1.11766
3769	0.436747	5.7	68.284				1102.36	839.541	1024.53	1020.09	1079.42	1269.14	1055.55	1003.68	1263.97	988.809	1122.88	1107.73	135.001	130.091	137.764	-1.13559	-1.12027	1.01367
1977	0.437023	8.47	30.872				21188.4	15777	13521.1	20808.2	14970.5	16149	17421.7	24153.3	19658.4	16828.8	17309.2	20411.1	3940.36	3086.95	3428.35	-1.02854	-1.21286	-1.1792
1135	0.438587	6.59	56.53				1775.62	1361.74	1449.95	1777.88	1782.21	1733.69	1747.04	1830.52	1297.99	1529.1	1764.59	1625.18	217.999	26.85	286.417	-1.15401	-1.06283	1.08578
1528	0.439869	5.32	40.7				5878.48	6212.77	4253.45	5743.39	6187	6586.22	7108.11	5395.27	6359.2	5448.23	6172.2	6287.53	1048.13	421.611	858.664	-1.13288	-1.15405	-1.01868
4204	0.442909	9.28	33.681				37695.5	17892.7	16906.9	60042.6	37138.6	18786.2	5073.6	33395.3	22641.6	24165	38655.8	20370.2	11728.1	20670	14296.8	-1.59966	1.18629	1.89767
2162	0.443171	8.88	27.247				25986.9	21636.2	19984.3	25379.1	20741.4	17909.6	24173.5	23177.3	26125.2	22535.8	21343.3	24492	3100.76	3770.96	1499.54	1.05587	-1.0868	-1.14753
3725	0.445492	9.52	17.403				3121.56	5234.26	6124.01	9197.82	3569.22	1042.7	3446.66	10281.1	12719.9	4826.61	4603.25	8815.89	1542.18	4174.74	4807.11	1.04852	-1.82652	-1.91515
610	0.445617	6.92	92.986				671.645	736.25	630.036	571.723	534.942	760.56	712.986	308.52	573.04	679.31	622.408	531.515	53.5199	121.048	205.406	1.09142	1.27806	1.17101
1939	0.447089	4.72	31.409				1344.63	379.019	862.088	619.42	792.014	814.293	993.547	1014.5	1272.13	861.912	741.909	1093.39	482.804	106.662	155.146	1.16175	-1.26857	-1.47375
2405	0.449279	7.51	23.09				41710.6	41801.1	40856.8	35024	48698.9	38428.9	35132.5	39565.9	36749.8	41456.2	40717.3	37149.4	521.04	7118.84	2243.51	1.01815	1.11593	1.09604
2365	0.449596	5.84	23.794				1102.59	1029.7	881.003	862.922	1239.93	963.831	1400.65	954.133	1234.97	1004.43	1022.23	1196.59	112.933	195.172	225.721	-1.01772	-1.19131	-1.17056
3809	0.45515	5.15	73.601				13766.2	12388.3	14798	12710.4	12564.1	15320.2	12388.3	11932.6	13139.2	13650.8	13531.5	12486.7	1209.01	1550.73	609.294	1.00881	1.09323	1.08368
827	0.455936	4.67	71.082				2104.72	2078.48	2257.78	2133.58	1785.92	2752.22	1731.93	2248.81	1668.76	2146.99	2223.91	1883.17	96.8327	489.442	318.23	-1.03582	1.1401	1.18094
664	0.461772	6.75	86.199				1088.72	1060.91	1379.98	1041.19	929.583	1265.56	1270.98	853.076	788.865	1176.54	1078.78	970.973	176.733	171.111	261.788	1.09062	1.21171	1.11103
1451	0.465099	6.31	43.622				1404.12	1462.29	1408.6	1217.55	1010.89	1407.63	1323.63	1158.35	2107.79	1425	1212.03	1529.92	32.3697	198.429	507.222	1.17572	-1.07363	-1.26229
4130	0.465417	7.42	23.844				5322.45	5449.58	5958.39	3628.41	5276.32	5857.75	6092.93	4879.11	6248.33	5576.81	4920.83	5740.13	336.516	1156.4	749.694	1.13331	-1.02929	-1.1665
3806	0.466287	7.25	100.113				425.912	662.263	628.974	642.38	683.742	871.321	861.644	427.917	488.408	572.383	732.481	592.656	127.935	122.005	234.905	-1.2797	-1.03542	1.23593
3217	0.468149	5.16	16.214				12474	8772.56	11406.1	12616.1	10945.5	14160.4	13340.6	10352.5	14148.4	10884.2	12574	12613.8	1905.09	1607.87	1999.57	-1.15526	-1.15891	-1.00316
1111	0.472383	7.82	57.369				27919.8	24849.5	20836.5	26251.5	23812.1	30506.3	28461.4	28729.2	25386.9	24535.3	26856.6	27525.8	3552.1	3387.89	1857.19	-1.09461	-1.12189	-1.02492
1840	0.474067	7.47	33.298				6809.27	5107.8	2890.69	6664.98	6956.85	5134.94	3955.64	9510.85	8951.36	4935.92	6252.26	7472.61	1964.94	978.569	3058.61	-1.26668	-1.51393	-1.19519
811	0.47418	5.52	71.828				1349.54	1543.81	1421.56	1259.6	1138.8	1570.84	1327.72	1697.41	1473.43	1438.3	1323.08	1499.52	98.21	222.902	186.224	1.08709	-1.04256	-1.13336
3753	0.476315	5.38	57.276				1891.89	1869.76	1824.6	2184.09	2206.9	1577.19	2426.77	1713.51	2660.2	1862.08	1989.39	2266.83	34.291	357.16	493.192	-1.06837	-1.21736	-1.13946
1645	0.476348	4.92	36.821				2535.3	2512.48	2018.34	3037.39	3930.8	2189.6	2111.29	2819.07	3246.29	2355.37	3052.6	2725.55	292.102	870.699	573.252	-1.29602	-1.15716	1.11999
2352	0.478576	7.22	24.02				24565.8	25608.2	20701.7	19471.6	24206.8	25953.8	25871.1	25680	25446.6	23625.2	23210.7	25665.9	2584.93	3353.93	212.614	1.01786	-1.08637	-1.10578
3549	0.481598	5.87	14.141				2322.98	3288.59	3218.19	2143.54	2946.96	3009.56	3850.7	2734.88	3235.33	2943.25	2700.02	3273.64	538.325	482.943	558.892	1.09009	-1.11225	-1.21245
3238	0.486146	7.08	16.085				1989.8	2751.54	2120	1945.78	2051.78	2244.54	2381.12	2233.56	2326.06	2287.12	2080.7	2313.58	407.439	151.466	74.5686	1.0992	-1.01157	-1.11192
1195	0.486293	5.26	53.638				1724.7	2143.09	1678.4	1797.21	2113.54	2038.63	1982.47	1852.94	2608.72	1848.73	1983.13	2148.04	255.971	165.306	404.18	-1.0727	-1.1619	-1.08316
4342	0.492001	6.77	100.113				1182.28	1295.14	1381.5	1190.19	1567.78	2069.58	1716.75	1210.57	1404.55	1286.31	1609.18	1443.96	99.9005	441.15	255.383	-1.25101	-1.12256	1.11442
4268	0.494614	9.02	39.094				63113.6	28316.2	46765.6	37646.3	58568.2	21821.3	21589.3	29449.3	37948.1	46065.1	39345.3	29662.2	17409.2	18432.3	8181.52	1.17079	1.55299	1.32644
1389	0.494993	7.28	45.715				4904.92	5750.46	3861.86	5028.13	5528.9	5841.99	4794.68	5524.04	5227.9	4839.08	5466.34	5182.21	946.018	410.52	366.821	-1.12962	-1.07091	1.05483
1771	0.497553	6.52	34.651				6042.9	3972.11	4499.89	3993.22	3504.41	5431.83	4715.12	4978.73	5773.73	4838.3	4309.82	5155.86	1076.07	1001.95	551.088	1.12262	-1.06563	-1.19631
3275	0.504041	7.92	15.904				6333.86	7201.05	6399.22	6663.6	7904.85	9646.65	8176.95	9213.33	5652.68	6644.71	8071.7	7680.99	482.913	1498.51	1831.41	-1.21476	-1.15596	1.05087
1733	0.511532	5.29	35.391				1740.33	1450.32	1988.45	1965.56	1690.12	1417.5	1174.21	1513.89	1741.38	1726.37	1691.06	1476.49	269.337	274.035	285.429	1.02088	1.16924	1.14532
3634	0.516145	7.07	12.997				27141.5	35169.9	27960.9	27122.9	36981.9	46147.9	34291.6	28687.6	34725.8	30090.8	36750.9	32568.3	4417.73	9514.6	3367.79	-1.22133	-1.08234	1.12842
1861	0.519673	6.6	32.889				830.256	655.313	876.382	700.472	640.65	952.414	922.408	820.196	874.376	787.317	764.512	872.327	116.622	165.454	51.1366	1.02983	-1.10797	-1.14102
1242	0.520896	8.43	50.746				6840.11	7189.04	6161.65	7053.83	5771.65	10080.3	7627.81	5974.29	4716.11	6730.27	7635.27	6106.07	522.425	2212.41	1460.32	-1.13447	1.10223	1.25044
2447	0.52223	9.27	22.136				12199.9	7073.36	8231.01	18122.8	11772.3	5772.51	4720.06	8179.25	9162.69	9168.1	11889.2	7354	2688.67	6175.97	2333.46	-1.2968	1.24668	1.6167
3822	0.523743	8.07	31.638				182541	192823	176076	214111	230098	172440	177615	198032	221332	183814	205550	198993	8445.9	29766.9	21874.5	-1.11825	-1.08258	1.03295
1984	0.524928	6.49	30.719				3290.76	2501.05	3647.7	3656.58	3378.61	3369.31	3030.68	3281.31	3211.81	3146.5	3468.17	3174.6	586.778	163.239	129.388	-1.10223	-1.00893	1.09247
1910	0.52589	7.36	31.97				8744.27	9239.07	8796.2	5548.09	11033.4	8188.66	7683.5	8070.41	6032.13	8926.51	8256.7	7262.01	271.925	2743.26	1082.53	1.08112	1.22921	1.13697
1384	0.526166	5.33	45.91				25150.9	25793.2	19193.3	17951.9	18739.5	22766.7	25775.8	17342.8	25807.8	23379.1	19819.4	22975.5	3639.19	2582.66	4878.04	1.17961	1.01757	-1.15924
3643	0.527459	5.18	12.929				30341.3	50799.1	53894.4	40814.3	51382.2	53000.9	59088.4	48982.2	52654.6	45011.6	48399.1	53575.1	12798.8	6618.34	5115.59	-1.07526	-1.19025	-1.10694
2765	0.530685	5.74	18.889				2502.38	2024.66	2856.87	2752.47	2297.94	3040.13	2921.16	2845.1	2548.72	2461.3	2696.85	2771.66	417.622	374.211	196.784	-1.0957	-1.12609	-1.02774
2453	0.532385	5.42	22.06				1864.28	1653.47	2064.82	1834.58	1885.58	2095.83	1960.91	1898.77	2214.77	1860.86	1938.66	2024.82	205.698	138.477	167.413	-1.04181	-1.08811	-1.04444
1970	0.534309	4.65	31				1401.82	810.721	875.465	1229.98	1050.9	1353.34	1213.31	1027.17	955.427	1029.34	1211.41	1065.3	324.202	152.074	133.1	-1.17688	-1.03494	1.13715
900	0.535846	7.91	68.097				959.515	1292.94	710.11	1057.06	1201.93	1347.52	961.511	1368.92	868.159	987.521	1202.17	1066.2	292.422	145.23	266.291	-1.21736	-1.07967	1.12753
1696	0.536119	6.71	35.979				540.598	270.136	501.623	470.43	412.05	604.76	660.04	518.269	461.503	437.452	495.747	546.604	146.205	98.8179	102.257	-1.13326	-1.24952	-1.10259
1476	0.538319	5.05	42.599				7325.07	6570.43	7252.63	5246.69	7525.26	7304.3	8346.61	7144.05	7068.74	7049.38	6692.08	7519.8	416.358	1256.61	717.025	1.05339	-1.06673	-1.12369
1694	0.538715	8.29	36.03				7148.24	10219.5	11205.6	4350.56	10491.9	7407.1	14637.3	7739.18	7492.47	9524.45	7416.52	9956.32	2116.1	3070.69	4055.73	1.28422	-1.04534	-1.34245
1023	0.540613	6.77	62.5				536.419	532.817	562.996	422.941	437.201	540.594	584.364	627.684	384.702	544.077	466.912	532.25	16.4831	64.208	129.603	1.16527	1.02222	-1.13994
3844	0.544451	8.51	79.412				5803.96	7212.68	6875.62	5330.57	5162.44	8669.65	6286.24	5915.96	4212.41	6630.75	6387.56	5471.53	735.591	1978.14	1106.04	1.03807	1.21186	1.16742
1823	0.547935	5.59	33.553				900.984	861.282	798.454	680.43	819.21	776.112	795.648	514.55	911.497	853.573	758.584	740.565	51.6979	71.0309	204.126	1.12522	1.1526	1.02433
792	0.547975	9.23	72.761				3208.64	2521.79	4000.26	3513.39	3837.25	1766.35	3588.83	3590.93	4077.7	3243.57	3039	3752.49	739.853	1113.98	281.645	1.06731	-1.1569	-1.23478
4293	0.548383	4.57	18.049				2419.49	2483.36	1805.9	1450.3	3211.37	2650.47	2887.83	2532.52	2999.83	2236.25	2437.38	2806.73	374.06	899.668	243.987	-1.08994	-1.25511	-1.15154
4380	0.549687	9.17	28.779				29601.4	9743.1	8938.24	31816.1	13999.2	12659.7	14311.8	27715.6	29433.5	16094.3	19491.7	23820.3	11704.5	10694.2	8279.31	-1.2111	-1.48005	-1.22208
3990	0.549821	5.78	39.483				49422.4	55985.7	41324.4	39989.5	40920.4	54166.4	44113.4	36980.7	46328.2	48910.8	45025.4	42474.1	7344.01	7929.99	4884.65	1.08629	1.15154	1.06007
3865	0.553804	5.51	60.821				9574.64	12373.1	13685.5	9624.71	7488.9	13896.1	12464.6	10415.4	13979.6	11877.8	10336.6	12286.5	2099.73	3262.37	1788.77	1.1491	-1.03442	-1.18865
3039	0.553835	6.4	17.093				1671.84	1781.09	2060.61	2087.39	1522.18	1926.42	1972.55	2169.21	1912.83	1837.84	1845.33	2018.2	200.504	291.201	134.145	-1.00407	-1.09813	-1.09368
1603	0.554225	5.33	38.363				3642.79	2708.05	2772.89	2588.06	3201.67	2221.68	2812.92	2936.39	2852.05	3041.24	2670.47	2867.12	521.962	495.167	63.0987	1.13884	1.06073	-1.07364
1208	0.558121	6.19	52.705				2435.29	2375.15	2172.34	2329.26	2110.46	2331.89	1708.29	2125.39	2501.4	2327.59	2257.2	2111.69	137.775	127.093	396.73	1.03119	1.10224	1.06891
2822	0.558693	9.25	18.437				11388.4	6086.19	5045.26	7972.97	4459.38	3294.42	3478.93	6118.69	6918.77	7506.62	5242.25	5505.47	3401.78	2435.54	1800.05	1.43194	1.36348	-1.05021
1829	0.560819	4.58	33.451				529.504	657.052	597.828	400.225	715.114	601.127	511.944	386.917	580.528	594.795	572.155	493.13	63.828	159.431	98.167	1.03957	1.20616	1.16025
4013	0.560822	6.3	99.095				2239.93	2839.04	3224.89	2691.95	3128.88	3882.09	4927.15	1477.79	1314.38	2767.95	3234.31	2573.11	496.316	602.038	2040.3	-1.16848	1.07572	1.25696
2153	0.561441	8.08	27.4				46262.8	43864.6	42684.4	48728.1	55549.2	42460	43432.5	52286.4	43185.1	44270.6	48912.4	46301.3	1823.4	6546.56	5184.67	-1.10485	-1.04587	1.05639
947	0.561634	5.91	66.231				369.557	666.206	993.545	526.321	442.507	704.694	1120.69	499.312	868.152	676.436	557.841	829.385	312.12	133.905	312.498	1.2126	-1.22611	-1.48678
692	0.562735	8.21	81.109				33426.7	28503	22119.8	19381.5	19863.1	34098.5	24776.5	23906.4	19204.3	28016.5	24447.7	22629.1	5669.17	8361.27	2997.66	1.14598	1.23808	1.08037
3897	0.564156	5.17	80.09				4755.1	4441.82	5407.02	5114.23	4656.97	5626.62	5479.8	3441.38	4629.13	4867.98	5132.61	4516.77	492.404	485.082	1023.85	-1.05436	1.07776	1.13634
637	0.567706	6.27	88.914				2191.15	1636.58	1962.58	1723.74	2027.27	2309.92	2456.79	1449.85	1194.3	1930.1	2020.31	1700.31	278.708	293.156	667.471	-1.04674	1.13515	1.1882
1613	0.567746	6.72	37.974				1324	689.093	1252.85	1196.9	970.523	1483.11	1151.56	1395.56	1405.93	1088.65	1216.84	1317.68	347.85	256.872	143.963	-1.11775	-1.21038	-1.08287
1344	0.568096	7.26	47.176				10524.2	11246.4	8076.87	8776.68	7326.91	10947	8207.26	8328.12	9213.24	9949.17	9016.86	8582.87	1661.19	1821.95	549.247	1.1034	1.15919	1.05056
3916	0.568934	8.67	55.131				6563.38	9207.11	6896.52	4927.29	6829.94	8737.06	8717.26	9553.26	6550.12	7555.67	6831.43	8273.55	1439.85	1904.89	1549.96	1.10602	-1.09501	-1.2111
789	0.569006	5.39	72.854				2424.89	1996.83	2427.24	1812.98	2258.56	2530.22	2478.88	1400.63	1989.71	2282.99	2200.58	1956.41	247.819	362.119	539.892	1.03745	1.16693	1.12481
3833	0.569055	5.32	114.367				987.596	1245.44	1429.04	840.805	781.945	1447.19	1430.05	1026.17	1101.57	1220.69	1023.31	1185.93	221.761	368.264	214.748	1.19289	1.02931	-1.15892
1269	0.572071	6.23	49.659				1068.18	1777.06	1441.08	1126.82	1076.56	1695.35	1561.13	1372.75	1729.66	1428.77	1299.58	1554.52	354.599	343.668	178.549	1.09942	-1.08801	-1.19617
2936	0.57222	9.07	17.739				24777	15549.2	19394.7	26815.7	26513.4	19682.8	10624.5	24825.5	23087.3	19907	24337.3	19512.4	4635.2	4033.75	7746.08	-1.22255	1.02022	1.24727
886	0.582271	5.88	68.657				1055.54	958.941	1225	865.479	982.469	1278.27	1262.21	1061.9	1184.5	1079.82	1042.07	1169.53	134.681	212.753	100.987	1.03623	-1.08308	-1.12232
1681	0.584502	6.59	36.157				1525.68	624.771	966.893	973.665	780.312	1263.89	1269.66	1246.59	1168.18	1039.12	1005.96	1228.14	454.779	243.403	53.1948	1.03296	-1.18191	-1.22087
1595	0.585426	5.12	38.607				1858.58	1790.7	1554.71	1581.52	1664.58	1811.58	1960.25	1664.35	1814.02	1734.66	1685.89	1812.88	159.495	116.502	147.954	1.02893	-1.04509	-1.07532
876	0.590892	6.81	69.03				3075.83	3194	2942.17	2460.66	2822.82	3530.67	3182.73	2691.95	2336.94	3070.67	2938.05	2737.21	125.995	544.229	424.708	1.04514	1.12182	1.07337
3968	0.592256	5.78	58.209				1785.11	1791.47	2511.12	1789.02	2918.62	3080.23	3639.63	1689.62	2581.57	2029.23	2595.96	2636.94	417.34	703.486	976.184	-1.27928	-1.29948	-1.01579
277	0.592818	7.21	127.602				947.355	1384.2	1402.93	1234.82	1233.51	413.777	1302.17	671.863	904.523	1244.83	960.702	959.518	257.792	473.652	318.731	1.29575	1.29735	1.00123
2053	0.5941	4.62	29.187				1018.81	2263.53	961.55	970.458	955.766	1081.36	983.376	1037.11	1444.17	1414.63	1002.53	1154.89	735.726	68.6655	251.966	1.41106	1.22491	-1.15197
3832	0.594432	9.32	24.799				30945.1	18872.7	20409.3	27967.4	24884.7	9852.09	12397.5	16562.1	20798.1	23409	20901.4	16585.9	6571.48	9692.32	4200.35	1.11997	1.41138	1.26019
2114	0.594758	5.41	28.115				2997.26	2792.61	2963.92	3564.17	2903.71	2698.47	2879.07	2728.2	2829.48	2917.93	3055.45	2812.25	109.804	452.36	76.8969	-1.04713	1.03758	1.08648
2320	0.596037	6.81	24.623				607.303	788.74	550.273	701.758	584.676	451.256	781.785	623.01	604.054	648.772	579.23	669.616	124.525	125.339	97.6022	1.12006	-1.03213	-1.15605
1192	0.59744	4.36	53.731				4522.6	5589.75	5023.02	4182.61	5757.94	4879.12	5012.46	5340.51	5945.76	5045.12	4939.89	5432.91	533.917	789.42	473.464	1.0213	-1.07686	-1.0998
2357	0.598333	6.71	23.92				4134.29	3563.58	3262.08	3216.25	4086.58	4521.72	4011.37	3416.01	2917.19	3653.32	3941.52	3448.19	442.976	664.714	547.799	-1.07889	1.05949	1.14307
1826	0.59946	5.66	33.528				1435.12	2174.35	1725.11	1607.92	1427.22	1926.88	1943.26	1680.88	2046.68	1778.19	1654.01	1890.27	372.46	253.001	188.569	1.07508	-1.06303	-1.14284
910	0.602441	6.26	67.537				1386.23	1031.49	1293.97	1063.7	813.406	1491.16	1308.43	817.145	931.686	1237.23	1122.75	1019.09	184.051	342.712	257.042	1.10197	1.21406	1.10172
627	0.604117	6.18	89.932				1604.27	1788.84	1633.38	1370.92	1651.32	1932.57	1938.82	1248.31	1263.36	1675.49	1651.6	1483.5	99.2295	280.823	394.394	1.01447	1.12942	1.11332
3779	0.604332	6.1	49.805				745.855	808.811	587.655	547.239	567.663	689.481	911.606	429.273	1391.86	714.107	601.461	910.914	113.945	76.9087	481.296	1.18729	-1.2756	-1.5145
887	0.604692	7.71	68.563				2263.69	2724.36	1365.6	1520.66	1450.9	2291.23	1917.12	1641.83	1387.16	2117.89	1754.26	1648.7	691.017	466.334	265.042	1.20728	1.28458	1.06403
4444	0.6129	9.43	37.049				76614.5	36111	48630.7	113325	53178.2	72701.2	5653.86	76172.3	91923.5	53785.4	79734.8	57916.5	20737.9	30684.1	45940.9	-1.48246	-1.07681	1.37672
477	0.613722	5.21	110.973				892.424	856.014	1148.78	711.526	918.461	1039.8	889.435	1064.89	1056.63	965.74	889.928	1003.65	159.562	165.986	99.0004	1.08519	-1.03926	-1.12779
2195	0.614134	5.07	26.583				2127.57	2251.57	2177.64	2780.42	2520.04	2096.81	2632.52	1891.98	2616.43	2185.6	2465.76	2380.31	62.3808	345.019	422.981	-1.12818	-1.08909	1.0359
1552	0.61551	6.1	39.824				15967.4	14234	15675.8	12639.6	13052.4	20570.4	19062.3	14353	19049.1	15292.4	15420.8	17488.2	928.131	4464.46	2715.12	-1.0084	-1.14359	-1.13406
3873	0.617766	5.09	77.376				2601.55	2559.68	2962.74	2927.04	2740.8	2722.05	3180.09	1718.82	2554.17	2707.99	2796.63	2484.36	221.614	113.327	733.131	-1.03273	1.09001	1.12569
4252	0.619899	8.89	87.557				78392.8	59408.8	67960	110885	105266	34678.7	51292	60848.2	50536.4	68587.2	83610.2	54225.5	9507.53	42468.9	5747.88	-1.21903	1.26485	1.5419
3856	0.621601	6.59	67.537				939.528	799.683	1047.13	894.104	923.723	1080.79	868.09	1239.99	1035.74	928.78	966.205	1047.94	124.073	100.332	186.249	-1.04029	-1.1283	-1.08459
1531	0.622737	4.74	40.652				656.108	434.036	509.562	554.48	516.495	406.314	507.864	535.71	653.43	533.236	492.43	565.668	112.913	76.9588	77.2688	1.08287	-1.06082	-1.14873
1000	0.62337	7.83	63.619				1171.29	739.643	835.624	1212.42	844.017	932.711	844.001	968.704	722.708	915.52	996.384	845.138	226.645	192.28	123.002	-1.08833	1.08328	1.17896
3820	0.627464	6.16	126.584				2604.76	3777.13	3864.49	2748.79	2403.17	3100.42	4439.74	2314.55	2334.74	3415.46	2750.79	3029.68	703.443	348.628	1221.19	1.24163	1.12733	-1.10138
1757	0.628939	7.98	34.983				133098	128197	102627	129648	123580	118954	102374	106667	132189	121308	124061	113743	16362.1	5362.9	16118.2	-1.02269	1.0665	1.09071
2318	0.630357	6.64	24.648				572.047	291.104	457.01	381.974	374.055	387.613	388.098	391.708	292.581	440.054	381.214	357.462	141.237	6.81115	56.2178	1.15435	1.23105	1.06645
2517	0.636087	4.68	21.055				964.346	597.96	1128.7	716.018	862.253	1162.46	609.251	684.135	936.83	897.001	913.578	743.405	271.702	227.605	171.644	-1.01848	1.20661	1.22891
4447	0.641377	8.28	72.481				2637.29	2492.77	1848.09	2297.45	959.289	2591.06	2011.17	2405.85	2193.93	2326.05	1949.27	2203.65	420.185	869.824	197.517	1.1933	1.05555	-1.1305
832	0.644909	5.86	70.802				501.002	611.028	648.714	406.526	606.118	598.736	787.708	387.695	301.596	586.915	537.127	492.333	76.7517	113.164	259.399	1.09269	1.19211	1.09098
2436	0.646251	5.69	22.412				1850.43	1246.22	1258.14	1466.74	1319.39	997.067	1220.4	1487.8	1519.61	1451.6	1261.07	1409.27	345.451	240.207	164.337	1.15109	1.03003	-1.11752
2510	0.65147	9.16	21.156				16773.8	10567.4	11450.6	13175.5	10708.2	6731.33	6736.32	12853.3	13630.9	12930.6	10205	11073.5	3357.49	3251.43	3776.21	1.26708	1.1677	-1.08511
962	0.652483	6.08	65.485				1581.22	1732.55	1770.58	1509.92	939.89	2100.77	2066.12	1737.9	1444.56	1694.78	1516.86	1749.53	100.169	580.47	310.944	1.1173	-1.0323	-1.15339
2122	0.655153	4.66	27.936				2075.69	1740	1739.03	1955.3	2068.57	1866.48	1823.12	1863.93	2207.27	1851.57	1963.45	1964.78	194.09	101.291	210.998	-1.06042	-1.06114	-1.00068
1063	0.670714	7.43	60.168				774.526	687.663	1149.4	813.132	664.53	904.071	1168.16	582.667	411.579	870.53	793.911	720.802	245.383	120.922	396.756	1.09651	1.20772	1.10143
1621	0.674804	5.94	37.487				5769.77	4222.05	3961.85	4005.46	5775.11	7884.22	4510.04	7458.09	4320.84	4651.23	5888.26	5429.66	977.388	1941.85	1759.22	-1.26596	-1.16736	1.08446
2224	0.68155	6.15	26.072				1550.23	2665.86	1954.97	1525.59	1712.93	2088.97	1982.11	1801.58	2087.51	2057.02	1775.83	1957.07	564.774	286.907	144.598	1.15834	1.05107	-1.10206
3827	0.682838	8.53	67.444				17681.2	14305.4	14049.1	14605.1	10297.6	15648.2	16907.9	14060.3	11093.9	15345.2	13517	14020.7	2027.07	2836.4	2907.21	1.13526	1.09447	-1.03726
4134	0.685395	6.26	36.54				833.878	1103.69	928.646	1086.15	831.055	1541.42	1044.57	833.499	1195.96	955.406	1152.88	1024.68	136.884	359.854	182.046	-1.20669	-1.0725	1.12511
1720	0.686823	4.92	35.57				1838.52	2277.05	2214.7	1586.94	2468.58	1398.06	1590.64	1651.19	2581.17	2110.09	1817.86	1941	237.244	571.397	555.231	1.16075	1.08711	-1.06774
4470	0.687195	6.2	12.391				2510.58	7305.55	3604.03	3779.64	4437.07	3803.12	2761.52	3472.71	3630.04	4473.39	4006.61	3288.09	2512.92	372.977	462.761	1.1165	1.36048	1.21852
1529	0.688407	7.3	40.7				1309.27	1045.82	738.568	1171.42	1036.73	1300.95	962.874	1304.48	964.847	1031.22	1169.7	1077.4	285.629	132.118	196.662	-1.13429	-1.04479	1.08566
1302	0.691533	5.8	48.491				1546.67	1363.68	1024.69	1133.16	976.178	1140.24	944.222	2303	1070.77	1311.68	1083.19	1439.33	264.85	92.7442	750.631	1.21094	-1.09732	-1.32879
2451	0.693494	6.19	22.085				3476.29	3102.65	2777	2539.01	4080.95	4064.83	3452.11	3399.26	3415.37	3118.65	3561.59	3422.25	349.919	885.62	27.0863	-1.14203	-1.09735	1.04072
903	0.695732	6.68	67.817				719.091	727.438	633.791	623.23	737.128	1161.08	983.214	666.8	702.878	693.44	840.478	784.297	51.8257	283.427	173.209	-1.21204	-1.13102	1.07163
1502	0.698874	6.49	41.772				1347.5	1070.37	1335.49	1009.05	1193.27	1316.62	1239.84	1132.57	1501.75	1251.12	1172.98	1291.38	156.648	154.788	189.911	1.06662	-1.03218	-1.10095
1390	0.70442	7.36	45.715				2279.74	2307.42	1392.62	2483.99	2119.03	1795.71	2074.51	1917.3	1518.98	1993.26	2132.91	1836.93	520.356	344.352	286.355	-1.07006	1.08511	1.16113
1838	0.706117	6.87	33.323				1851.69	1638.25	2081.19	1750.68	1335.63	2032.39	2265.1	1316.27	1307.87	1857.04	1706.23	1629.75	221.519	350.499	550.244	1.08839	1.13947	1.04693
1325	0.709582	7.53	47.809				1488.36	1513.78	1659.02	1737.84	1080.43	1802.4	1917.91	2016.82	1336.84	1553.72	1540.22	1757.19	92.0726	399.501	367.378	1.00876	-1.13096	-1.14087
1108	0.711535	4.76	57.649				2023.74	1268.27	1507.76	1465.61	1703.28	1051.5	1284.81	1870.02	1671.09	1599.92	1406.8	1608.64	386.074	329.847	297.564	1.13728	-1.00545	-1.14347
2504	0.716172	9.42	21.256				5630.38	2627.22	3147.28	8295.87	6778.81	2328.12	2227.86	5500.02	4618.08	3801.62	5800.93	4115.32	1604.95	3101.73	1693.03	-1.52591	-1.08252	1.4096
512	0.717102	5.51	106.561				626.846	586.181	316.472	976.433	446.199	464.409	493.361	403.761	526.179	509.833	629.013	474.433	168.685	301.012	63.3658	-1.23376	1.07461	1.32582
1335	0.71749	6.42	47.371				468.821	356.986	379.171	655.726	331.497	403.689	397.283	419.825	332.405	401.659	463.637	383.171	59.2122	170.225	45.3862	-1.15431	1.04825	1.21
723	0.718197	6.76	77.036				655.075	1090	823.589	593.181	628.636	986.595	905.023	837.219	674.855	856.222	736.137	805.699	219.292	217.626	118.277	1.16313	1.06271	-1.0945
3649	0.718836	6.57	12.845				19398.8	23105.7	22257.5	18735.3	23130.4	25319.2	20608.2	21803.4	19573.8	21587.3	22394.9	20661.8	1942.21	3353.01	1115.76	-1.03741	1.04479	1.08388
2261	0.722629	6.8	25.485				2955.45	4142.68	4731.04	3178.11	3473.48	3809.34	4315.8	3437.86	3612.68	3943.06	3486.98	3788.78	904.473	315.83	464.707	1.1308	1.04072	-1.08655
3993	0.727761	9.06	56.53				5247.54	6358.8	9382.49	5160.88	7330.95	5358.03	5119.27	7609.53	7960.35	6996.28	5949.95	6896.38	2139.92	1200.04	1548.99	1.17585	1.01449	-1.15907
1194	0.729128	8.16	53.731				5802.86	4806.3	3676.36	6329.54	5055.06	4516.65	4631.65	4850.94	5403.91	4761.84	5300.42	4962.17	1063.95	931.019	397.964	-1.1131	-1.04207	1.06817
3726	0.729285	4.99	46.933				7639.55	8477.91	6854.32	7246.71	10155.9	8332.55	9608.37	6486.32	9104.79	7657.26	8578.39	8399.83	811.939	1470.09	1676.16	-1.12029	-1.09698	1.02126
3787	0.732252	9.2	25.128				20809.9	13230.7	16030	21102.6	21207.5	12037.4	11981.7	16564.1	16480.6	16690.2	18115.8	15008.8	3832.47	5264.36	2621.92	-1.08542	1.11203	1.20701
2298	0.732819	5.98	25.026				18050.3	21054.1	23491.7	16168.7	17331.1	25601.2	25694.4	19700.3	20298.8	20865.3	19700.3	21897.8	2725.61	5143.26	3301.55	1.05914	-1.04948	-1.11155
1079	0.735149	4.2	59.422				456.594	686.145	589.387	607.529	504.241	564.986	789.449	640.67	487.519	577.375	558.919	639.213	115.246	51.9109	150.97	1.03302	-1.1071	-1.14366
883	0.735958	7.63	68.843				1271.65	1466.69	877.298	823.496	1125.84	1531.97	1587.63	782.945	681.191	1205.21	1160.43	1017.25	300.261	355.502	496.57	1.03859	1.18477	1.14075
1780	0.737848	5.24	34.574				3625.05	3966.42	3408.62	3391.23	4207.51	4175.6	3603.58	4196.19	3366.58	3666.69	3924.78	3722.11	281.222	462.342	427.319	-1.07039	-1.01511	1.05445
4077	0.742683	5.05	63.34				5768.77	4840.79	6082.13	3829.48	5200.13	7316.38	5446.13	4143.65	4985.13	5563.9	5448.66	4858.3	645.531	1756.68	660.436	1.02115	1.14524	1.12152
3546	0.742855	5.74	14.192				3213.98	2825.77	1968.88	2372.51	3300.68	3239.78	3244.63	3805.41	2245.66	2669.54	2970.99	3098.57	637.08	519.192	790.069	-1.11292	-1.16071	-1.04294
2020	0.743774	5.1	29.8				454.516	278.095	361.748	452.266	432.057	312.813	508.412	310.783	453.81	364.786	399.045	424.335	88.2499	75.3603	102.058	-1.09392	-1.16324	-1.06338
894	0.746732	7.02	68.284				843.935	1585.22	1312.34	878.255	1054.54	1285.47	1253.04	1147.61	1153.14	1247.16	1072.75	1184.6	374.913	204.216	59.3359	1.16258	1.05281	-1.10426
864	0.755185	6.67	69.496				1034.6	857.823	953.11	974.975	848.642	1226.72	1293.06	791.512	628.311	948.512	1016.78	904.294	88.4796	192.472	346.428	-1.07197	1.0489	1.12439
1164	0.755642	8.3	55.037				10892.3	12021.2	10624.4	11154.2	8683.56	13650.4	14099.4	11500.9	10778.8	11179.3	11162.7	12126.4	741.307	2483.43	1746.43	1.00148	-1.08472	-1.08633
578	0.756945	4.89	98.416				13627.7	15144.1	18549.3	13516	13753	15309.1	17576.2	16455.1	11728.8	15773.7	14192.7	15253.3	2520.45	974.032	3103.4	1.11139	1.03411	-1.07473
3616	0.758512	4.88	13.114				68709	90461.1	97395.2	69325	96628	86489.2	70905.6	70459.4	90820.7	85521.7	84147.4	77395.2	14967.4	13801.3	11629	1.01633	1.105	1.08724
3781	0.761005	6.47	18.437				985.292	1274.45	1560.33	1390.32	1905.22	1156.87	949.155	1686.04	1322.46	1273.36	1484.14	1319.22	287.521	382.896	368.452	-1.16553	-1.03602	1.12501
264	0.762757	5.57	128.281				14445.3	28560.6	42853.6	23816.5	39405.2	34913.4	34632.4	24691	21021.2	28619.8	32711.7	26781.5	14204.2	8024.19	7042.27	-1.14297	1.06864	1.22143
1172	0.76488	5.07	54.757				2176.04	1630.56	1435.7	1866.63	2274.07	1681.48	1569.96	1788.42	2404.99	1747.43	1940.73	1921.12	383.754	303.166	433.041	-1.11062	-1.0994	1.01021
632	0.767857	6.33	89.253				2561.01	2347.59	2413.36	2255.91	2240.55	2740.37	3117.63	1813.81	1863.37	2440.65	2412.28	2264.94	109.293	284.242	738.868	1.01176	1.07758	1.06505
4214	0.772857	8.22	33.426				7440.02	9183.27	6313.26	11256.3	7083.84	7566.85	10683.1	6111.02	5823.48	7645.52	8635.66	7539.2	1446	2282.34	2726.5	-1.12951	1.0141	1.14543
3798	0.775125	6.22	99.434				2260.88	3274.44	3115.78	2535.68	3347.02	3738.18	5228.09	1687.47	1744.32	2883.7	3206.96	2886.63	545.18	613.362	2027.97	-1.1121	-1.00102	1.11097
3876	0.778875	4.28	105.204				681.253	885.885	743.382	831.048	849.811	673.869	637.434	820.141	1233.06	770.174	784.909	896.878	104.914	96.6202	305.137	-1.01913	-1.16451	-1.14265
2531	0.779818	6.63	20.854				1827.76	1458.17	1775.69	871.412	2253.93	1613.74	1512.65	1585.41	1197.15	1687.21	1579.7	1431.74	200.05	691.889	206.388	1.06806	1.17843	1.10334
4285	0.780654	7.65	11.195				17173.3	28363.6	43941.9	23789	27304.2	37952.4	27629.5	20217.3	25685.8	29826.3	29681.8	24510.9	13444.1	7374.98	3843.24	1.00487	1.21686	1.21097
3965	0.785174	7.28	99.774				396.366	543.2	408.748	364.613	515.49	796.062	803.732	366.375	484.132	449.438	558.722	551.413	81.4357	218.949	226.308	-1.24316	-1.22689	1.01325
4197	0.788608	5.51	40.506				15315.8	10505.8	10744.1	10116.4	13448.7	15113.2	16577.2	10539.1	14368.4	12188.6	12892.8	13828.2	2710.87	2544.37	3055.04	-1.05778	-1.13453	-1.07255
2268	0.789914	7.3	25.357				2708.2	3621.46	2297.87	2527.5	2648.98	3813.92	3243.23	2217.14	2458.64	2875.84	2996.8	2639.67	677.533	710.25	536.467	-1.04206	1.08947	1.13529
1053	0.791701	6.72	60.728				1398.1	2939.32	2101.95	2163.76	1609.81	2887.37	2285.61	1851.44	1431.36	2146.45	2220.31	1856.14	771.573	640.654	427.141	-1.03441	1.15641	1.1962
4324	0.796984	5.27	114.367				3096.96	3693.24	5717.65	3171.06	3951.36	4781.79	4909.06	2759.7	3096.04	4169.28	3968.07	3588.27	1373.67	805.495	1156.13	1.05071	1.16192	1.10585
968	0.805026	6.25	65.205				3197.55	2721.22	3035.71	2623.24	2309.21	3777.66	3440.69	2775.71	3152.34	2984.83	2903.37	3122.91	242.209	773.264	333.464	1.02806	-1.04626	-1.07562
2629	0.806354	7.62	19.742				3030.3	2791.61	3426.88	1760.78	4068.13	2650.51	2520.24	3408.24	2436.75	3082.93	2826.47	2788.41	320.889	1163.7	538.408	1.09073	1.10562	1.01365
1788	0.80753	8.11	34.421				11362	14095.8	9505.63	10549.7	15452.5	6620.74	15344.4	11718.9	9665.98	11654.5	10874.3	12243.1	2309	4424.8	2875.29	1.07175	-1.05051	-1.12588
1782	0.814363	6.25	34.549				621.292	863.534	806.281	740.183	768.781	621.039	929.877	597.954	838.157	763.702	710.001	788.663	126.609	78.3592	171.408	1.07564	-1.03268	-1.11079
857	0.816001	6.15	69.683				480.691	488.834	501.625	471.83	394.862	499.401	651.001	318.886	402.071	490.384	455.364	457.319	10.5529	54.1794	172.813	1.0769	1.0723	-1.00429
1411	0.817305	5.51	45.131				77074.9	70222.4	71954.9	64852.1	64467	80914	72750.2	61804.6	95032.2	73084.1	70077.7	76529	3563.07	9386.47	16933.1	1.0429	-1.04714	-1.09206
3802	0.818257	9.46	12.963				4998.67	5071.27	8509.02	13584.6	7582.68	4112.38	4854.16	6990.21	9151.41	6192.98	8426.55	6998.6	2006.07	4792.15	2148.64	-1.36066	-1.13008	1.20403
3847	0.822393	8.57	79.751				3007.99	3910.15	2442.82	3112.31	1646.09	3540.77	3235.61	3033.43	2134.99	3120.32	2766.39	2801.34	740.088	993.578	585.867	1.12794	1.11387	-1.01264
2138	0.824467	9.18	27.681				16242.6	8386.05	12263	20337.5	8357.28	7350.71	9220.05	17780.1	14589.5	12297.2	12015.2	13863.2	3928.37	7224.92	4325.98	1.02347	-1.12734	-1.15381
3872	0.829151	6.13	99.774				1399.9	2101.9	2194.57	1467.01	1812.76	1892.31	3373.91	905.97	1083.66	1898.79	1724.03	1787.85	434.529	226.108	1376.44	1.10137	1.06205	-1.03702
878	0.829765	6.88	68.937				2352.98	2651.36	1943.79	1666.33	2404.23	2287.73	2748.48	1897.35	2052.81	2316.04	2119.43	2232.88	355.229	396.694	453.239	1.09277	1.03725	-1.05353
4231	0.836194	9.42	38.85				71482	29415.6	44133.8	58783.3	62926.4	8904.93	30772.6	36566.3	45316	48343.8	43538.2	37551.6	21346.8	30064.7	7321.62	1.11038	1.2874	1.15942
1684	0.838919	8.96	36.157				3398.47	5881.86	4269.96	3612.93	6175.57	3263.68	3433.1	5607.33	5911.53	4516.76	4350.73	4983.98	1259.96	1589.98	1351.69	1.03816	-1.10344	-1.14555
3783	0.839505	9.41	16.473				4530.76	2300.64	3104.72	3886.55	3267.83	1681.45	1872.34	4345.55	5002.4	3312.04	2945.28	3740.1	1129.42	1137.39	1650.53	1.12452	-1.12924	-1.26986
1158	0.844823	5.49	55.224				1425.66	1186.62	1019.51	1140.16	1120.66	1038.34	1351.12	834.65	1293.97	1210.6	1099.72	1159.92	204.137	54.0447	283.134	1.10082	1.0437	-1.05474
3819	0.844934	7.86	86.878				5108.77	4744.26	4731.57	4047.59	5550.65	5734.99	4895.37	5511.09	5028.96	4861.53	5111.08	5145.14	214.204	925.605	323.887	-1.05133	-1.05834	-1.00666
3189	0.845286	9.19	16.382				16817.9	11576.6	10923.7	17166.5	14067.9	11125	10538.3	16348.4	17371.2	13106.1	14119.8	14752.6	3231.08	3021.08	3685.39	-1.07735	-1.12563	-1.04482
3789	0.846068	7.02	36.949				1849.5	1778.54	1163.28	1539.93	950.604	1821.34	1323.56	1481.44	1614.55	1597.11	1437.29	1473.19	377.377	444.349	145.672	1.11119	1.08412	-1.02497
4369	0.847264	9.38	26.2				28155	9648.31	12229.7	33280.1	17832.2	12915.4	7782.85	27192.2	24220.8	16677.7	21342.6	19732	10023.1	10626.5	10454.3	-1.27971	-1.18314	1.08162
2011	0.84731	5.49	29.979				806.78	758.198	709.234	826.669	770.179	778.795	630.333	983.313	848.141	758.071	791.881	820.595	48.7729	30.4335	178.095	-1.0446	-1.08248	-1.03626
2455	0.847484	5.24	22.01				1465.26	1686.55	1475.33	1093.23	1382.59	1849.41	1557.72	1195.1	1658.27	1542.38	1441.75	1470.36	124.956	381.546	243.628	1.0698	1.04898	-1.01985
4225	0.850188	5.1	46.543				29276	24109.4	25494.3	23634.8	25372	25106	27544.4	20283.4	28911.9	26293.3	24704.3	25579.9	2674.34	935.683	4637.61	1.06432	1.02789	-1.03544
1680	0.850866	5.07	36.157				661.797	642.772	596.811	884.233	672.689	530.368	698.479	635.818	638.111	633.793	695.764	657.469	33.4106	178.057	35.5339	-1.09778	-1.03736	1.05825
2210	0.854465	5.22	26.353				1267.07	1644.62	1882.66	1818.38	1165.16	1274.31	1185.77	2271.93	1277.27	1598.11	1419.28	1578.33	310.419	349.907	602.418	1.126	1.01254	-1.11206
1952	0.856175	4.93	31.281				1188.13	572.141	1070.94	1169.95	1035.58	849.775	1048	848.273	1036.11	943.736	1018.44	977.461	327.101	160.776	112.037	-1.07915	-1.03574	1.04192
420	0.859581	7.1	116.742				1436.09	1812.06	1347.01	1005.97	1240.95	2095.86	1656.25	1109.27	1376.6	1531.72	1447.59	1380.71	246.829	573.574	273.513	1.05811	1.10937	1.04844
4190	0.860902	4.92	38.948				3284.84	2730.77	3184.71	2687.92	4165.46	1888.49	2760.54	2871.79	3532.54	3066.77	2913.96	3054.95	295.262	1155.19	417.322	1.05244	1.00387	-1.04839
990	0.862962	6.63	63.993				755.732	721.78	832.079	667.713	803.879	788.106	883.253	609.938	968.661	769.864	753.233	820.617	56.491	74.4813	187.384	1.02208	-1.06593	-1.08946
1986	0.863554	5.72	30.694				1735	1728.86	2233	2006.08	2684.15	1571.21	1864.2	1876.91	2375.29	1898.95	2087.15	2038.8	289.31	560.88	291.476	-1.0991	-1.07364	1.02371
2197	0.866088	5.54	26.532				873.107	1017.15	695.034	814.597	971.58	904.219	803.092	739.875	995.232	861.765	896.799	846.066	161.36	78.7543	132.992	-1.04065	1.01856	1.05996
3885	0.866432	9.33	23.593				3744.55	2586.71	2823.3	3811.46	3525.79	2107.76	1633.23	3484.04	3357.4	3051.52	3148.34	2824.89	611.729	912.416	1033.95	-1.03173	1.08022	1.1145
4387	0.870017	9.26	29.494				53789.3	38656.3	38305.8	67033.4	33464.9	21333.7	28452.6	44620.4	53273.5	43583.8	40610.6	42115.5	8839.97	23673	12598.6	1.07321	1.03486	-1.03706
1379	0.870187	5.24	46.056				15773.6	13858.6	13870.8	10631.1	14321.1	15700.4	15631.5	10703.8	16152.8	14501	13550.9	14162.7	1102.13	2620.96	3006.8	1.07012	1.02389	-1.04515
4328	0.871482	5.87	126.584				4691.45	8855.85	9386.28	4759.55	7286.17	8199.73	8839.78	5743.19	5173.7	7644.53	6748.49	6585.56	2571.15	1782	1972.87	1.13278	1.1608	1.02474
623	0.873682	6.04	90.271				431.69	392.235	304.659	211.367	309.831	470.692	622.191	224.807	269.137	376.195	330.63	372.045	65.0167	130.908	217.764	1.13781	1.01115	-1.12526
4245	0.877388	9.19	35.391				53592.7	19747.6	22196.5	55839.1	35194.6	21556	19531.1	35876.6	40541.3	31845.6	37529.9	31983	18873.3	17260.5	11033	-1.17849	-1.00431	1.17343
3555	0.878345	9.46	13.99				33403.9	16023.4	28852.5	46873.4	21623.2	11443	9799.05	22881.8	32999.8	26093.3	26646.6	21893.5	9012.81	18241.5	11631.9	-1.0212	1.19182	1.2171
1373	0.884846	9.1	46.397				14119.7	7430.94	13880	18037.9	11308.1	8373.54	8940.34	15461.1	16332.9	11810.2	12573.2	13578.1	3794.46	4954.85	4040.02	-1.0646	-1.14969	-1.07993
2192	0.887594	4.92	26.634				2355.59	1719.9	2443.42	2097.91	2266.13	1854.01	1888.81	2090.33	2729.33	2172.97	2072.68	2236.16	394.818	207.212	438.828	1.04839	-1.02908	-1.07887
1220	0.89122	4.97	51.772				2050.34	1583.59	2092.27	1775.23	2931.52	1658.3	1855.42	1766.9	2664.78	1908.73	2121.68	2095.7	282.365	703.774	494.82	-1.11157	-1.09795	1.0124
676	0.892368	5.23	83.484				1349.45	1358.08	1584.05	1581.68	1375.78	1739.76	2176.21	945.259	1423.58	1430.53	1565.74	1515.02	133.028	182.514	620.546	-1.09452	-1.05906	1.03348
1174	0.892759	5.77	54.664				8092.35	8481.38	8640.99	6803.19	8505.48	8842.63	8820.2	6760.49	9097.58	8404.91	8050.43	8226.09	282.201	1093.22	1276.8	1.04403	1.02174	-1.02182
1542	0.893321	4.82	40.165				2645.99	1745.13	2433.56	2380.6	2305.87	1677.11	1911.41	2226.02	2620.46	2274.89	2121.2	2252.63	470.923	386.398	355.275	1.07246	1.00988	-1.06196
1112	0.897286	5.04	57.276				1106.86	858.671	1222.63	963.941	1062.12	1191.87	1194.21	873.916	986.584	1062.72	1072.64	1018.24	185.951	114.327	162.474	-1.00934	1.04369	1.05343
2051	0.898227	7.48	29.264				2101.45	2683.91	2503.15	1843.55	3195.51	1938.96	2132.37	2614.36	2097.83	2429.5	2326	2281.52	298.133	754.525	288.768	1.04449	1.06486	1.0195
3593	0.898673	4.69	13.333				50222	43780.8	72367.5	49973.7	67503.7	56353.4	53973.4	48113.1	60577.5	55456.8	57943.6	54221.3	14995.1	8872.54	6235.87	-1.04484	1.02278	1.06865
3165	0.901285	7.01	16.486				1299.8	936.611	1200.63	1138.82	715.902	1397.28	998.537	1068.04	1309.51	1145.68	1084	1125.36	187.725	343.982	163.222	1.0569	1.01805	-1.03816
3792	0.90166	6.97	116.742				4940.44	3947.87	4398.63	4128.25	4597.93	5537.02	5762.71	2960.25	4868.54	4428.98	4754.4	4530.5	496.983	717.304	1431.49	-1.07348	-1.02292	1.04942
2480	0.908713	9.06	21.583				3489.77	2316.11	3040.57	4392.29	3389.37	2041.93	2264.05	3922.43	3863.31	2948.82	3274.53	3349.93	592.182	1179.38	940.861	-1.11045	-1.13603	-1.02303
1006	0.910246	4.21	63.34				1045.58	1542.82	796.322	1110.74	980.131	986.034	731.772	1200.72	1125	1128.24	1025.64	1019.17	380.053	73.763	251.753	1.10004	1.10702	1.00635
898	0.921286	6.04	68.097				947.911	749.119	630.858	970.049	585.239	1056.47	1218.28	710.077	630.873	775.963	870.587	853.076	160.222	250.868	318.744	-1.12194	-1.09938	1.02053
4356	0.921989	7.87	120.814				1490.55	1825.65	920.219	2727.04	1118.48	774.01	1955.77	1579.45	1157.52	1412.14	1539.84	1564.24	457.781	1042.47	399.342	-1.09043	-1.10771	-1.01585
1526	0.922779	6.82	40.798				1906.69	1916.88	1802.87	1756.79	2026.88	2013.5	2672.89	1529.79	1906.38	1875.48	1932.39	2036.35	63.0865	152.22	582.527	-1.03035	-1.08578	-1.0538
1562	0.92402	7.3	39.483				8729.48	9048.88	6431.31	7677.4	7646.52	9778.22	7310.19	9257.42	7368.7	8069.89	8367.38	7978.77	1428.01	1221.92	1107.73	-1.03686	1.01142	1.04871
2299	0.924501	4.94	25				992.432	838.089	1049.09	770.061	1007.09	1032.55	875.175	834.013	1314.12	959.871	936.567	1007.77	109.205	144.759	266.104	1.02488	-1.0499	-1.07602
2855	0.924558	9.5	18.178				6143.49	11603.2	10508.7	23644.8	5786.83	4720.89	3977.87	16949.2	19057.6	9418.48	11384.2	13328.2	2888.52	10631.4	8165.97	-1.20871	-1.41511	-1.17077
1110	0.925257	4.31	57.369				795.854	713.914	728.672	782.646	718.57	750.339	647.656	834.556	835.766	746.147	750.518	772.659	43.6756	32.0385	108.258	-1.00586	-1.03553	-1.0295
672	0.928389	5.2	84.163				1297.49	664.793	851.007	769.479	1058.65	837.572	1214.63	463.707	940.187	937.765	888.568	872.841	325.151	151.182	379.964	1.05537	1.07438	1.01802
1427	0.931598	5.29	44.742				7345.8	6550.45	8115.9	6751.69	7650.8	8092.48	7919.18	6722.03	7234.68	7337.38	7498.32	7291.96	782.763	683.276	600.629	-1.02193	1.00623	1.0283
2417	0.932635	4.42	22.864				3841.4	3546.23	2488.37	3929.12	3692.32	2713.7	2751.76	2800.4	4196.09	3292	3445.05	3249.42	711.443	644.333	820.202	-1.04649	1.0131	1.0602
2095	0.936932	8.59	28.396				15267.8	8354.06	4180.88	11258.5	9236.74	7261.21	6851.79	11370.8	9189.24	9267.58	9252.15	9137.27	5599.62	1998.69	2259.95	1.00167	1.01426	1.01257
2383	0.938601	5.78	23.442				5713.51	3825.27	3470.99	3010.28	4626.87	4652.55	4961.49	3655.11	4299.17	4336.59	4096.57	4305.26	1205.53	940.839	653.213	1.05859	1.00728	-1.05094
1623	0.942015	6.35	37.341				747.526	723.102	917.712	636.147	693.936	1150.27	848.131	901.957	762.099	796.113	826.785	837.396	106.013	281.633	70.5445	-1.03853	-1.05186	-1.01283
874	0.946327	7.54	69.123				1394.24	1448.56	745.262	775.315	1095.65	1315	1482.78	1477.04	644.163	1196.02	1061.99	1201.33	391.311	271.411	482.529	1.12621	-1.00444	-1.13121
3794	0.94896	9.41	38.753				58148.3	42758.8	46594.9	80922.2	62981.7	17604.4	31365.4	52368.2	47393.4	49167.3	53836.1	43709	8010.73	32634.6	10975.5	-1.09496	1.12488	1.23169
1642	0.951	5.65	36.898				776.467	1045.02	682.413	808.057	772.67	893.797	813.786	894.946	836.626	834.632	824.841	848.453	188.169	62.2834	41.8526	1.01187	-1.01656	-1.02863
4198	0.956597	9.4	33.809				100200	71634.9	113536	168611	197320	40337.6	42722.1	148529	167142	95123.5	135423	119464	21406.8	83587.9	67109.2	-1.42365	-1.25589	1.13358
1102	0.958517	5.43	57.929				6659.27	5618.9	5992.45	5636.97	6531.74	7108.31	7987.93	3281.38	8055.96	6090.21	6425.67	6441.76	527.028	741.382	2737.18	-1.05508	-1.05772	-1.0025
3325	0.958543	5.34	15.659				6602.15	5880.7	3939.64	4347.38	5709.24	5315.35	3857.89	6633.59	6005.04	5474.17	5123.99	5498.84	1377.03	700.807	1455.44	1.06834	-1.00451	-1.07316
3410	0.960581	5.2	15.181				974.098	1108.46	1019.55	1015.5	1223.62	854.183	882.451	1040.47	1096.84	1034.04	1031.1	1006.59	68.3435	185.21	111.139	1.00285	1.02727	1.02435
3548	0.963081	6.8	14.158				1153.27	1362.45	824.549	695.321	1460.56	1230.29	1441.64	998.569	1045.22	1113.42	1128.73	1161.81	271.156	392.601	243.464	-1.01374	-1.04346	-1.02931
1109	0.968239	6.55	57.463				1748.8	1129.87	1477.09	1538.48	1235.45	1696.37	1583.75	1268.9	1476.74	1451.92	1490.1	1443.13	310.235	234.239	160.092	-1.0263	1.00609	1.03255
2018	0.975664	7.89	29.851				2759.05	5413.93	3274.04	3673.33	4156.02	2967.36	2957.5	5002.62	3552.14	3815.68	3598.9	3837.42	1407.88	597.812	1051.98	1.06023	-1.0057	-1.06627
3743	0.977274	6.93	17.972				2579.85	1877.16	2360.12	2103.67	1889.55	3241.87	1530.03	3893.71	2272.34	2272.38	2411.7	2565.36	359.471	726.882	1208.78	-1.06131	-1.12893	-1.06372
3796	0.978556	8.57	27.017				12950.8	8828.17	6246.4	11921.6	7476.88	9182.11	9695.69	12348.1	6811.18	9341.79	9526.86	9618.31	3381.57	2242.32	2769.25	-1.01981	-1.0296	-1.0096
4408	0.980344	9.26	30.311				13630.4	13572.9	12715	22781.8	23373.5	5441.94	14039.2	13697.8	14940.7	13306.1	17199.1	14225.9	512.705	10186.3	642.151	-1.29257	-1.06913	1.209
3455	0.980664	4.86	14.949				9031.19	10353.3	14947.6	8296.97	16905.5	10856.6	10229.3	8792.45	14667.6	11444.1	12019.7	11229.8	3105.38	4420.56	3062.68	-1.0503	1.01908	1.07034
834	0.981097	7.8	70.709				13258.5	10652.8	9869.94	12040.1	8032.12	13575.8	12062.1	10831.6	10956.7	11260.4	11216	11283.5	1774.13	2862.26	677.21	1.00396	-1.00205	-1.00601
869	0.981827	6.37	69.31				1375.98	1242.55	1684.15	1375.4	1413.59	1414.32	1677.52	1388.09	1160.8	1434.22	1401.11	1408.8	226.492	22.2623	258.985	1.02364	1.01804	-1.00549
1291	0.98408	7.64	48.685				1898.11	1568.32	1634.97	1625.33	1655.6	1827.37	1448.82	1760.45	1847.64	1700.47	1702.77	1685.63	174.378	108.968	209.673	-1.00135	1.0088	1.01016
3751	0.984293	9.44	48.247				71609.7	26958.1	46118.5	74103.8	49576.7	29143.2	30477.7	51347.3	66350.5	48228.8	50941.2	49391.8	22400.4	22511.3	18016.1	-1.05624	-1.02412	1.03137
4032	0.98526	7.7	33.426				98246.4	91102.2	81803.6	83227.2	101162	80799.5	67576	113678	92566.3	90384	88396.4	91273.3	8244.88	11122.1	23078	1.02249	-1.00984	-1.03255
1114	0.985442	5.6	57.276				1931.69	1697.86	2134.03	1661.87	1696.38	2326.68	1761.74	1710.27	2257.61	1921.19	1894.98	1909.88	218.276	374.266	302.249	1.01384	1.00593	-1.00786
1538	0.990333	6.44	40.36				1332	1254.21	1762.03	1251.97	1186.17	1915.3	1553.78	1344.99	1451.69	1449.41	1451.14	1450.15	273.515	403.312	104.401	-1.00119	-1.00051	1.00068
3594	0.991434	6.95	13.333				6928.16	10364.6	5235.89	5713.6	8763.05	7855.83	7475.88	8275.29	6574.21	7509.56	7444.16	7441.79	2613.34	1565.85	851.051	1.00879	1.00911	1.00032
1512	0.994764	5.63	41.431				4440.82	4729.14	5472.93	4664.44	4560.06	5430.75	5084.57	4019.47	5488.67	4880.97	4885.08	4864.24	532.541	475.437	758.979	-1.00084	1.00344	1.00429

## Sheet: Table S2
Table S2. Protein and peptide identification details for specific gel spots.
Spot	Accession	Description	mW (kDa)	pI (pH)	Score	Peptides	Coverage (%)	Precursor mass error (ppm)	Products	Products mass error (ppm)	Precursor MH+ (Da)	MH+ Error (ppm)	Score	Sequence	Modifications	Intensity	Products	BY Matches	Products mass error (ppm)
1025	A0A1D6APN5	Uncharacterized protein OS=Triticum aestivum OX=4565 PE=3 SV=1	36.546	6.0557	197.404	9	39.255	26.4039	132	33.0233	1146.54	7.6119	5.5865	(K)LPGGHGDHQQT(A)		3035	17	b1b2b6b7b9b9*b10b11b11*b11°y4y5°y6y6*y8y9°y10	26.216
	A0A1D6A827	Uncharacterized protein OS=Triticum aestivum OX=4565 PE=3 SV=1	88.603	6.063	169.215	20	33.4483	21.1815	252	29.6012	1020.49	-3.7014	5.1063	(G)VTDKGTQGTGG(I)		48452	11	b2b2°b3b7b11*y3y4y4°y5°y7°y11*	24.2357
	A0A1D6AU25	Uncharacterized protein OS=Triticum aestivum OX=4565 PE=4 SV=1	39.259	9.3032	154.478	3	24.8	20.5707	86	30.6904	2215.95	5.239	5.0734	(K)LPGGHGDHQQTAGTYGQHGHTG(M)	Deamidation Q (9), Deamidation Q (10), Deamidation Q (17)	49484	17	b1b2b3b8b14b19y4y4°y5y5°y6y6°y7°y10°y18y19*y22	37.6889
	A0A1D5RZI8	Cysteine proteinase inhibitor OS=Triticum aestivum OX=4565 PE=3 SV=1	83.469	4.3345	150.964	10	28.9346	25.6749	285	30.8439	1965.81	2.4366	5.0464	(G)ASTTSGTYGQHENTGTGTHG(A)	Deamidation Q (10), Deamidation N (13)	1261	6	b2°b11b14*b16*y12°y14	19.3872
											3441.53	15.7072	5.032	(L)ATGDTYGQQGHTDTGTHDTPATDGTYGQHGHTR(V)		3796	26	b2b3°b5b6b7b8b8°b9b11°b17°b18b24b24°b27*y3y5°y7y8y8*y9y11y20y21*y28y29°y32	35.6005
											2270.05	35.64	4.9158	(K)LPSGDEDHQHTGGTYGQQGQTG(A)		2215	9	b9*b17b19*y4°y7*y16*y17°y18y22	23.161
											1924.83	1.4958	4.9031	(G)ASATSGTYGQQENTGTGTHG(A)		427	4	b10b18y12*y19°	14.4811
											1155.57	5.6084	4.8864	(E)AYSTGGTGEKKG(I)		3889	6	b5°y4y4°y7°y8y8°	21.4135
											2730.18	0.1818	4.8673	(T)ATDGGQQGHNETTGTGTHGTDGTGEKKS(F)	Deamidation N (10)	4467	6	b3b3°b6°b8b20*y7°	31.9618
											2239.92	-1.8718	4.8451	(K)LSGGHGDHEQTGGTYGQQGHTD(A)	Deamidation Q (10)	1094	5	b11°b19*y12*y13*y17	31.2022
											2343.97	5.3643	4.8148	(K)LPSGDEDHQHTGGTYGQQGQTGA(V)	Deamidation Q (9), Deamidation Q (17), Deamidation Q (18)	3693	10	b3°b12°b15°y5*y6y8y8°y9°y14y16	24.4236
											2309.97	-1.059	4.7788	(K)LSGGHGDHQQTGGTYEQQGHTD(A)		14190	7	b4°b6°b7°b11b11*y5°y10	27.7826
											2867.25	3.8631	4.7741	(T)FGQQGHTDTATHGTPSTGGTYGQHEHTG(V)		1636	6	b11*b16*y1y11*y13°y17	26.9791
											2480.12	-4.7082	4.7707	(G)MGTHGTPATDSASRQHKHTGSTGTG(M)		5499	11	b4b5b9b13°y3°y6y10°y12°y14*y18°y25	30.7485
											1495.64	-32.258	4.7606	(K)LPGGHNDRQQTGDT(F)		508	8	b10*b14°y4y7°y8°y10*y11°y13°	34.9999
											2496.15	10.1032	4.7484	(G)MGTHGTPATDSASRQHKHTGSTGTG(M)	Oxidation M (1)	966	10	b3°b13b15°b19b23°y3°y14°y15*y18°y19	28.0004
											962.377	-8.2127	0	(K)LPSGDEDHQ(H)		1552	3	y2*y4°y6°	0
											1782.75	4.0453	0	(D)EDHQHTGGTYGQQGQTG(A)		634	1	b17°	0
											1892.75	-7.1396	0	(T)ATDGGQQGHNETTGTGTHGT(D)	Deamidation N (10)	749	0		0
											1118.49	-4.733	0	(K)LSGGHGDHQQT(G)		10914	1	y4*	0
1315	A0A1D5VMG1	Uncharacterized protein OS=Triticum aestivum OX=4565 PE=4 SV=1	47.353	7.4517	226.518	8	14.7253	24.0105	46	28.1448	974.427	-5.5733	6.3525	(A)ARSNPDWE(L)		288116	15	b4b4*b4°b6b6*b6°b7b7°b8y1y2y4y4°y5y7	18.7852
											601.318	-2.1187	5.5693	(L)LPSPTS(M)		3218	4	b3y3y3°y5°	23.4648
											1283.62	-18.4131	5.1007	(L)VTERRHSPSSQ(A)		4066	4	b2°b5°b7°y4°	0
											996.533	33.1636	4.972	(S)ASSSPPPVPAS(M)		9239	5	b4°b5b11°y6y11	28.9349
											1755.74	2.2384	4.8649	(E)IQVDSKGEGETDPYGC(F)	Deamidation Q (2), Carbamidomethyl C (16)	746	6	b4*b12b12*b13*b15y13	26.2956
											751.437	3.1321	4.7304	(R)LPAPASPV(V)		597	5	b2b6°b7y3y4	33.0627
											2351.05	2.4422	4.7023	(Q)VDSKGEGETDPYGCFSPRGRH(I)	Carbamidomethyl C (14)	616	4	b13b14°y13°y16	20.5314
											827.371	-9.6431	0	(A)ARSNPDW(E)		8318	0		0
4008	A0A1D5VMG1	Uncharacterized protein OS=Triticum aestivum OX=4565 PE=4 SV=1	47.353	7.4517	222.944	6	9.6703	20.3355	47	29.0699	912.365	6.9688	6.1503	(F)VGYDEDTN(V)		292116	14	b3b4b4°b5b5°b8b8°y3°y4y4°y5y5°y7y8	16.1369
	A0A1D6SAP7	Uncharacterized protein OS=Triticum aestivum OX=4565 PE=4 SV=1	51.807	8.127	184.746	6	10.6838	17.699	34	26.0325	1072.42	-0.4226	4.7965	(L)LCCGGYNTQ(A)	Carbamidomethyl C (2), Carbamidomethyl C (3)	2313	6	b2b4b8°y3°y6y7*	26.541
	A0A1D6AJU7	Uncharacterized protein OS=Triticum aestivum OX=4565 PE=4 SV=1	47.037	8.7378	175.268	4	7.3286	10.4161	39	19.7374	1290.64	-3.9491	4.7748	(Q)LWERKSNSDGV(V)		1014	4	b2b7*y8°y9°	17.4022
	A0A1D6A9W1	Uncharacterized protein OS=Triticum aestivum OX=4565 PE=4 SV=1	40.777	4.4692	107.515	2	13.4409	24.7912	31	23.5362	1295.62	-24.3371	4.6763	(F)VWDPLTGRQHS(V)		690	4	b7°b10*b11°y9°	0
	W5GSI6	Uncharacterized protein OS=Triticum aestivum OX=4565 PE=4 SV=1	76.473	9.0205	102.81	3	10.0147	29.9919	69	29.9522	1452.56	-34.8376	4.6564	(N)ICYDPFYPYTN(F)	Carbamidomethyl C (2)	2395	6	b3b8°b9b10y5°y7*	35.8796
	A0A1D6SEQ0	Uncharacterized protein OS=Triticum aestivum OX=4565 PE=4 SV=1	44.558	6.3267	77.9131	2	4.9261	26.1408	39	28.8992	1219.52	3.038	0	(N)ICYDPFYPY(T)	Carbamidomethyl C (2)	493	0		0
4114	P08488	Glutenin_ high molecular weight subunit 12 OS=Triticum aestivum OX=4565 PE=3 SV=1	70.824	7.623	236.942	6	19.8485	21.8033	151	29.5921	5218.4	-3.251	5.8178	(S)LQQPGQGQGQPGQRQQPGQGQHPEQGQQPGQGQQGYYPTSPQQPGQGQQ(L)		2737	57	b1b3b5b6*b9b9*b14*b15b20b21b22b25b25*b28b28°b29b30°b31*b33°b34b35°b36b43b47y2y2*y3*y6y7y8y9y10y10°y11y11*y12y12°y14y15y15°y17*y18y18°y19y19*y22°y24y25*y26y27*y28y30*y31°y32°y33*y35y39*	26.3414
	A0A1D5U5T5	Uncharacterized protein OS=Triticum aestivum OX=4565 PE=4 SV=1	40.957	6.9609	186.492	3	13.9474	22.2948	29	25.5226	4167.86	8.3559	5.3821	(Q)LGQGQQGYYPTSPQQPGQGQQPGQGQQGHCPMSPQQTGQ(A)	Deamidation Q (14), Carbamidomethyl C (30), Oxidation M (32)	2869	48	b2b3*b5*b6b7b8*b10*b11°b13b13*b14b14*b14°b15*b16b17°b19b20b21b22*b22°b28*b29b30b30*b31b33*b34b36°b37*y2y2*y3°y4°y5y5*y5°y6°y7°y18y19*y27y27°y29y29°y30*y32y36	33.4608
											2582.18	2.6571	4.8399	(Q)LGQGQQPGQWQQSGQGQQGHYPTS(L)		2442	4	b12*b13b13°b17	22.0293
											1978.91	-15.2371	4.769	(Q)IPASQQQPGQGQQGHYPAS(L)		1211	3	b17°y14°y15°	0
											2583.17	1.7965	4.7428	(Q)LGQGQQPGQWQQSGQGQQGHYPTS(L)	Deamidation Q (3)	2895	8	b7b7*b16°b17°y2°y4°y6y13	34.1688
											2881.27	-3.411	0	(H)PEQGQQPGQGQQGYYPTSPQQPGQGQQ(L)		559	5	b2°b4b11*b13b21*	38.3231
1066	P10387	Glutenin_ high molecular weight subunit DY10 OS=Triticum aestivum OX=4565 GN=GLU-D1-2B PE=3 SV=1	69.586	7.623	218.016	6	6.1728	4.2059	56	19.5257	1321.61	1.56	5.8254	(R)ELQESSLEACR(Q)	Carbamidomethyl C (10)	0	13	b2b2°b3°b4*y1y3y4y5y6y7y8y9y9*	15.9042
	P08488	Glutenin_ high molecular weight subunit 12 OS=Triticum aestivum OX=4565 PE=3 SV=1	70.824	7.623	216.768	5	6.0606	3.8892	48	18.8724	1113.6	0.8191	5.7266	(R)QVVDQQLAGR(L)		0	10	b2y1y3y4y5y6y6*y7y8y10*	20.2674
	A0A1D5SVW4	Uncharacterized protein OS=Triticum aestivum OX=4565 PE=4 SV=1	42.976	8.1313	216.768	5	10	3.8892	48	18.8724	916.52	-1.455	5.6857	(R)SVAVSQVAR(Q)		0	10	b2b2°b3y1y2y3y5y6y7y7*	16.1906
											1188.62	-0.0942	5.2675	(R)LPWSTGLQMR(C)		0	7	b2y4*y5y6y7y8y10	20.6689
											1204.62	8.3904	5.2275	(R)LPWSTGLQMR(C)	Oxidation M (9)	0	8	b2b3b5y5y6y7y8y10	22.6062
1082	A0A1D5YFA7	Beta-amylase OS=Triticum aestivum OX=4565 PE=3 SV=1	55.289	5.7627	234.817	4	10.041	3.2706	38	12.7903	671.443	-2.6552	6.4588	(R)VQLAIK(I)		0	15.2279	b2b2*b3b4b5y1y2y3y4y5	6.8828
	A0A1D5YFA6	Beta-amylase OS=Triticum aestivum OX=4565 PE=3 SV=1	58.827	5.2969	234.817	4	9.3333	3.2706	38	12.7903	1326.67	0.7611	5.5063	(R)YDPTAYNTILR(N)		0	18.0257	y5y6y7y8y9y11	13.3348
	A0A1D5XGF4	Beta-amylase OS=Triticum aestivum OX=4565 PE=3 SV=1	56.738	5.4097	195.05	3	6.1508	1.6678	21	10.1129	1992.92	7.4666	5.3656	(R)NVGASDPDIFYTDQHGTR(N)		0	16.4097	b2b5b6y3y5y8y9y12	7.983
	A0A1D5XGF3	Beta-amylase OS=Triticum aestivum OX=4565 PE=3 SV=1	58.691	5.2119	195.05	3	5.8935	1.6678	21	10.1129	1646.78	-0.8459	5.0482	(R)FFVDNGTYLTEQGR(F)		0	18.3979	b2y4y5y9y14	11.0187
2689	A0A1D6DC72	Uncharacterized protein OS=Triticum aestivum OX=4565 PE=4 SV=1	22.535	6.5771	564.158	6	10.3448	3.8907	114	15.326	2651.19	3.1522	6.663	(R)SQVVQHSSCLVMWEQCCQQLK(A)	Carbamidomethyl C (9), Oxidation M (12), Carbamidomethyl C (16), Carbamidomethyl C (17)	19331	30	b2b3b4b6b7b8b9b9°b10b11b12b14b20y1y2y3y3*y4y4*y5y5*y6y7y7*y8y8*y9y9*y10y21	15.3219
	A1EHE7	Gamma-gliadin OS=Triticum aestivum OX=4565 PE=2 SV=1	33.567	7.5425	397.898	4	4.4068	2.9281	38	16.6277	2635.2	2.7011	6.4881	(R)SQVVQHSSCLVMWEQCCQQLK(A)	Carbamidomethyl C (9), Carbamidomethyl C (16), Carbamidomethyl C (17)	20709	27	b2b3b6b7b9*b10b11b12b13b14b19b20y1y3y4y5y5*y6y6*y7y7*y8y8*y9y9*y10y21	15.8335
											2652.17	2.2729	6.2286	(R)SQVVQHSSCLVMWEQCCQQLK(A)	Carbamidomethyl C (9), Oxidation M (12), Deamidation Q (15), Carbamidomethyl C (16), Carbamidomethyl C (17)	24574	18	b2b3b4b6b10b12b15b20y1y2y3y5y6y7y8y8°y10y21	12.6982
											2636.19	5.2208	6.0525	(R)SQVVQHSSCLVMWEQCCQQLK(A)	Carbamidomethyl C (9), Deamidation Q (15), Carbamidomethyl C (16), Carbamidomethyl C (17)	20620	18	b2b4b7*b9b11b12b20y1y3y6y6*y7y7*y8y9y9*y10y21	13.3745
											2636.17	-2.5915	5.752	(R)SQVVQHSSCLVMWEQCCQQLK(A)	Carbamidomethyl C (9), Deamidation Q (15), Carbamidomethyl C (16), Carbamidomethyl C (17)	12802	8	b2b3b11b12b20y9y10y21	20.6749
											2652.18	5.8699	5.6252	(R)SQVVQHSSCLVMWEQCCQQLK(A)	Deamidation Q (2), Carbamidomethyl C (9), Oxidation M (12), Carbamidomethyl C (16), Carbamidomethyl C (17)	15725	13	b8*b8°b10b14b20y2y3y4y7y7*y8°y9y21	16.2281
3607	A0A1D6RXD1	Uncharacterized protein OS=Triticum aestivum OX=4565 PE=4 SV=1	13.834	9.3721	346.518	4	18.1818	3.8102	50	16.5824	1347.6	0.3919	5.9027	(R)QTCGYYLSAER(Q)	Carbamidomethyl C (3)	9475	17	b2*b2°b3*b4*b4°b5b5*b5°b6*b6°y1y3y4y6y7y8y9	16.2795
	Q43691	Trypsin/alpha-amylase inhibitor CMX2 OS=Triticum aestivum OX=4565 PE=2 SV=1	13.88	8.8696	346.518	6	18.1818	5.8217	51	17.256	1604.74	3.0206	5.8227	(R)QTCGYYLSAERQK(R)	Carbamidomethyl C (3), Deamidation Q (12)	4161	11	b2°b4*b5b5*b13y3y5y6y7y8y10	20.339
	Q43723	Trypsin/alpha-amylase inhibitor CMX1/CMX3 OS=Triticum aestivum OX=4565 PE=2 SV=1	13.822	9.1245	346.518	4	18.1818	3.8102	50	16.5824	961.552	6.0077	5.8044	(R)EFIAGIVGR(E)		11752	11	b2b2°b3°b4°b9y2y3y4y5y6y7	14.123
	A0A1D5XMK2	Uncharacterized protein OS=Triticum aestivum OX=4565 PE=4 SV=1	14.724	7.9468	346.518	3	15.2672	4.0393	39	15.3576	1348.58	-3.5638	5.7138	(R)QTCGYYLSAER(Q)	Deamidation Q (1), Carbamidomethyl C (3)	4102	11	b2°b3°b4°b5°y2y4y5y6y7y8y9	15.0725
											572.355	6.5304	0	(I)AGIVGR(E)		463	1	b4	37.9128
											943.545	10.131	0	(R)EFIAGIVGR(E)		531	0		0
4155	A0A1D5XS09	Uncharacterized protein OS=Triticum aestivum OX=4565 PE=4 SV=1	68.865	7.2466	1305.35	18	22.2586	4.2649	212	19.4713	1189.63	0.8289	7.3022	(K)ALRPFDEVSR(L)		25256	17	b2b3b6b7b8b8°b9b10y2y3y4y5y5°y6y7y7°y8°	14.7227
	I6QQ39	Globulin-3A OS=Triticum aestivum OX=4565 GN=Glo-3A PE=2 SV=1	66.284	8.2749	1305.35	21	23.1293	4.4842	222	19.3054	991.55	2.5695	7.2493	(R)RPYVFGPR(S)		12789	13	b1b3b4b5b6b7b8y3y4y5y6y7y8	12.0519
	A0A1D5X6G4	Uncharacterized protein OS=Triticum aestivum OX=4565 PE=4 SV=1	71.217	8.2075	1305.35	18	21.5531	4.2649	212	19.4713	1064.65	2.3743	7.074	(K)ILHTISVPGK(F)		18324	16	b3b4b4°b5°b6b6°b7b7°y1y2y3y5y6y7y8y8°	12.6885
	W5ECA4	Uncharacterized protein OS=Triticum aestivum OX=4565 PE=4 SV=1	69.407	6.6094	1199.01	17	20.9416	4.3794	201	19.841	715.472	0.6033	6.9893	(R)VLTAALK(T)		3388	11	b2b3b3°b5b5°b6°y1y2y3y5y6	10.6578
	A0A1D5XS10	Uncharacterized protein OS=Triticum aestivum OX=4565 PE=4 SV=1	55.371	9.5347	1164.14	14	19.9187	2.7923	160	18.0594	1044.55	-0.3272	6.8276	(R)VAIMEVNPR(A)	Oxidation M (4)	8517	10	b2b3y2y3y3*y4y5y5°y6y7	20.897
	A0A1D5X6G5	Uncharacterized protein OS=Triticum aestivum OX=4565 PE=4 SV=1	57.635	9.3105	1164.14	14	19.1781	2.7923	160	18.0594	1360.72	1.3627	6.7523	(R)DTFNLLEQRPK(I)		8581	18	b2b2°b3b3°b4b9y2y3y4y4*y5y5*y5°y6y6*y7y8y8*	18.9349
	A0A1D5XS07	Uncharacterized protein OS=Triticum aestivum OX=4565 PE=4 SV=1	61.843	6.6973	1057.8	13	16.5756	2.8858	149	18.4888	1906.01	-6.018	6.6463	(R)GSAFVVPPGHPVVEIASSR(G)		24899	15	b3°b4b5b5°b6b6°y1y6y7y8y9y11y12y13y14	14.9571
	A0A1D5XS08	Uncharacterized protein OS=Triticum aestivum OX=4565 PE=4 SV=1	47.24	9.1904	1038.73	12	20.3349	2.9621	144	18.689	1281.63	-2.8171	6.4985	(R)SFHALAQHDVR(V)	Deamidation Q (7)	2908	10	b3b3°b4y1y2y4y5°y6y7y8	13.4543
	A0A1D5Y5R1	Uncharacterized protein OS=Triticum aestivum OX=4565 PE=4 SV=1	46.205	11.5459	691.701	7	11.6667	3.1587	80	19.7184	1361.71	0.1458	6.4184	(R)DTFNLLEQRPK(I)	Deamidation Q (8)	4270	13	b2b2°b3°b4b5*y2y4y5y6y6°y7y8y11*	19.7991
	A0A1D5Y5R3	Uncharacterized protein OS=Triticum aestivum OX=4565 PE=4 SV=1	69.167	6.9917	673.818	6	7.1545	2.7316	64	14.3342	701.41	1.5879	6.3098	(R)VWLAGR(N)		5804	5	b2b3y2y3y5	11.2881
	A0A1D5Y5R4	Uncharacterized protein OS=Triticum aestivum OX=4565 PE=4 SV=1	62.073	8.1826	673.818	6	7.9855	2.7316	64	14.3342	1028.56	5.1881	6.2122	(R)VAIMEVNPR(A)		13701	9	b2y2y3*y4y5y5°y6y7y8	9.2058
	W5EST8	Uncharacterized protein OS=Triticum aestivum OX=4565 PE=4 SV=1	70.575	6.7163	673.818	7	7.0175	2.5766	65	15.3842	1822.9	13.2556	6.1804	(R)GSSNLQVVCFEINAER(N)	Carbamidomethyl C (9)	2972	21	b2°b3b5b5°b7b7*b9b9°b10b11°b13*y3y4y4°y6*y8y9y9*y9°y11y11°	30.0591
	A0A1D5Y5R2	Uncharacterized protein OS=Triticum aestivum OX=4565 PE=4 SV=1	67.606	6.8071	673.818	6	7.309	2.7316	64	14.3342	2138.06	-0.9457	6.0179	(R)QGDVIVAPAGSIMHLANTDGR(R)	Oxidation M (13)	6520	7	b3b4*b5*b6y6y8y14	25.924
											1823.86	-0.985	5.9396	(R)GSSNLQVVCFEINAER(N)	Deamidation Q (6), Carbamidomethyl C (9)	1388	5	b6°y4y8y9y11	26.6945
											2222.05	-3.9676	5.9029	(R)GSSNLQVVCFEINAERNER(V)	Carbamidomethyl C (9)	8037	11	b4b6*b7*y4*y7*y11y12y13y14y14°y15	14.4599
											2122.07	-1.8508	5.8925	(R)QGDVIVAPAGSIMHLANTDGR(R)		3295	6	b4b21y2y9*y15y17	21.5859
											1775.9	-4.3354	5.7573	(R)GDSRDTFNLLEQRPK(I)		1555	7	b8y2y3y4y5y6y13	21.5651
											2278.16	-4.7612	5.2335	(R)QGDVIVAPAGSIMHLANTDGRR(K)		928	8	b3b4*b5*b10b14°y1y3y5°	24.8582
											616.408	8.0686	0	(V)LTAALK(T)		653	6	b2b2°b3°b4b4°b5	17.9518
											503.321	4.6556	0	(L)TAALK(T)		1999	2	b2b3	11.4023
											665.4	3.1633	0	(K)ILHTIS(V)		616	2	y2°y4°	0
4272	A0A1D5XS09	Uncharacterized protein OS=Triticum aestivum OX=4565 PE=4 SV=1	68.865	7.2466	2632.59	31	34.2062	4.1942	375	15.8022	1280.65	-0.9594	7.6446	(R)SFHALAQHDVR(V)		27218	22	b3b3°b4b4°b5b5°b6b6°b7b8b9y1y2y3y4y5y5°y6y6*y7y8y9	10.8744
	I6QQ39	Globulin-3A OS=Triticum aestivum OX=4565 GN=Glo-3A PE=2 SV=1	66.284	8.2749	2446.61	28	24.4898	4.5982	315	15.958	1189.63	-4.449	7.5974	(K)ALRPFDEVSR(L)		37090	18	b2b3b5b6b7b8b9b9°b10y2y3y3°y4y5y5°y6y7y8°	8.3479
	A0A1D5X6G4	Uncharacterized protein OS=Triticum aestivum OX=4565 PE=4 SV=1	71.217	8.2075	2446.61	23	22.8209	4.3493	298	15.9172	1360.72	-0.317	7.5622	(R)DTFNLLEQRPK(I)		14516	23	b2b2°b3b3°b4b5b6*b6°b9y1y2y3y4y4*y5y5°y6y6*y7y7*y8y8*y9	13.4191
	A0A1D5XS10	Uncharacterized protein OS=Triticum aestivum OX=4565 PE=4 SV=1	55.371	9.5347	2208.33	25	33.3333	3.8987	286	14.9611	1064.64	-5.0929	7.4935	(K)ILHTISVPGK(F)		28850	18	b2b3b4b4°b5°b6b6°b7b7°y1y2y3y4y5y6y7y8y8°	10.919
	A0A1D5X6G5	Uncharacterized protein OS=Triticum aestivum OX=4565 PE=4 SV=1	57.635	9.3105	2022.35	17	19.3738	3.9833	209	14.8155	715.468	-4.8022	7.442	(R)VLTAALK(T)		6454	13	b2b3b3°b5b5°b6b6°y1y2y3y4y5y6	8.6393
	A0A1D5XS07	Uncharacterized protein OS=Triticum aestivum OX=4565 PE=4 SV=1	61.843	6.6973	1970.65	16	17.8506	3.9044	198	15.0493	1361.71	0.5781	7.4301	(R)DTFNLLEQRPK(I)	Deamidation Q (8)	8077	19	b2b2°b3°b4b5b5°b9y2y3y4y4*y5y5*y5°y6y7y8y8*y9	22.7379
	A0A1D5XS08	Uncharacterized protein OS=Triticum aestivum OX=4565 PE=4 SV=1	47.24	9.1904	1896.23	16	26.0766	3.872	196	15.4891	701.408	-2.3539	7.3653	(R)VWLAGR(N)		8299	9	b2b3b4b6y1y2y3y4y5	11.9458
	W5EST8	Uncharacterized protein OS=Triticum aestivum OX=4565 PE=4 SV=1	70.575	6.7163	1159.49	12	11.4833	3.2624	106	12.1677	1906.03	3.6924	7.3045	(R)GSAFVVPPGHPVVEIASSR(G)		50067	25	b2°b3b3°b4b4°b5b5°b6b6°b7y1y2°y3y4y5y5°y6y8y9y10y11y12y13y13°y14	18.3829
	A0A1D5Y5R3	Uncharacterized protein OS=Triticum aestivum OX=4565 PE=4 SV=1	69.167	6.9917	1159.49	9	11.7073	3.0155	101	10.5665	1822.89	7.2463	7.2045	(R)GSSNLQVVCFEINAER(N)	Carbamidomethyl C (9)	5771	26	b2b2°b4b5b5*b6b6*b6°b7b7*b7°b9b9*b10b14y2y3y3°y4y6y8y9y10y11y11*y16	21.5976
	A0A1D5Y5R4	Uncharacterized protein OS=Triticum aestivum OX=4565 PE=4 SV=1	62.073	8.1826	1148.17	8	11.7967	2.5874	94	10.5209	821.411	-4.7541	7.187	(R)LFEADAR(S)		13165	7	b2y1y2y3y4y5y6	8.6753
	A0A1D5Y5R1	Uncharacterized protein OS=Triticum aestivum OX=4565 PE=4 SV=1	46.205	11.5459	665.817	8	11.6667	3.9353	85	16.0725	991.545	-2.6585	7.1456	(R)RPYVFGPR(S)		17920	10	b1b3b4b6y1y4y5y6y7y8	10.8317
											1028.55	-2.2528	7.119	(R)VAIMEVNPR(S)		18513	11	b2y1y2y3y3*y4y5y5°y6y7y8	9.8422
											1281.63	-2.4148	7.0296	(R)SFHALAQHDVR(V)	Deamidation Q (7)	8179	11	b3b3°b4b9y1y2y4y5y6y7y8	9.3457
											1617.81	-3.1321	6.9314	(R)RQGQEEESSISIVR(A)		6671	13	b1b3b3*b4b5b6b7y1y4y5y7y8y14*	17.3893
											1462.7	-2.7815	6.8888	(R)QGQEEESSISIVR(A)	Deamidation Q (1)	6566	14	b3b4°b5°y2y4y5y7y8y8°y9y9°y10y10°y13	12.3246
											1823.87	4.7894	6.8519	(R)GSSNLQVVCFEINAER(N)	Deamidation Q (6), Carbamidomethyl C (9)	3728	10	b7b8y3y4y5y8y9y10y11y16	19.0032
											1044.55	-2.9251	6.8155	(R)VAIMEVNPR(S)	Oxidation M (4)	12981	9	b2y2y3y3*y4y5y5°y6y7	13.3297
											1461.71	-3.8461	6.7309	(R)QGQEEESSISIVR(A)		5891	16	b2b2*b3b3*b4*b5*b5°b7*y2y3y5y7y8y9y10y13	19.8944
											2122.08	3.4704	6.5735	(R)QGDVIVAPAGSIMHLANTDGR(R)		5907	8	b3*b4°b5*b7y2y9y14y21*	23.037
											1657.87	-0.3459	6.4694	(K)LDSPAQELTFGRPAR(E)		14114	6	b2y3y10y11y12y13	9.9967
											2294.15	-5.7857	6.4421	(R)QGDVIVAPAGSIMHLANTDGRR(K)	Oxidation M (13)	7028	11	b3b3*b4*b4°b5*b5°y3y15y16y18y22*	10.9356
											2646.09	-3.821	6.4069	(R)GSGSESESESEEEQDQQRYETVR(A)		8892	11	b2b3°b5°b6°y12y14y15y16y17y18y23	13.2865
											906.463	-5.3181	6.3984	(R)EVQEVFR(A)		3512	7	b2°b3°y2y3y4y5y5*	11.1602
											2222.05	-6.1568	6.2539	(R)GSSNLQVVCFEINAERNER(V)	Carbamidomethyl C (9)	18136	16	b4*b5b5*b5°b6*b7b17*y4*y8*y10*y11y12y13y14y14*y15	14.8515
											1618.8	-3.9074	6.1958	(R)RQGQEEESSISIVR(A)	Deamidation Q (2)	4501	5	b4b5b6y4y7	6.8537
											2278.17	-2.0558	6.1063	(R)QGDVIVAPAGSIMHLANTDGRR(K)		3273	9	b2b3b3°b4b4*b5*y11*y15y16	28.7674
											1823.87	3.1746	6.1001	(R)GSSNLQVVCFEINAER(N)	Carbamidomethyl C (9), Deamidation N (13)	838	5	y5*y8y9y10y16	14.396
											2138.05	-5.8014	6.0907	(R)QGDVIVAPAGSIMHLANTDGR(R)	Oxidation M (13)	8448	9	b3b4b4*b5*b9*b21y7y8y14	20.6992
											1775.89	-7.6645	5.894	(R)GDSRDTFNLLEQRPK(I)		2891	4	b8y4y5y13	18.7187
											871.568	-5.0366	5.8732	(K)RVLTAALK(T)		3294	5	b4b4°b5b6y1	10.8488
											2283.21	-5.0327	5.7392	(R)NNVIGKLDSPAQELTFGRPAR(E)		1940	5	b2b3y13y17y21	22.1253
4351	P10388	Glutenin_ high molecular weight subunit DX5 OS=Triticum aestivum OX=4565 GN=GLU-1D-1D PE=3 SV=5	90.238	6.4849	103.84	2	3.6557	3.24	32	15.6341	1473.73	1.9976	5.7275	(K)AQQLAAQLPAMCR(L)	Oxidation M (11), Carbamidomethyl C (12)	0	16	b2b3b3*b4b4*b5b5*b6b8y1y5y6y7y8y9y10	16.3249
	P08489	Glutenin_ high molecular weight subunit PW212 OS=Triticum aestivum OX=4565 PE=3 SV=1	89.119	5.7773	103.84	2	3.6993	3.24	32	15.6341	1990.97	3.6729	5.0486	(K)GGSFYPGETTPPQQLQQR(I)		0	3	b5y8y13	13.4407
390	P10388	Glutenin_ high molecular weight subunit DX5 OS=Triticum aestivum OX=4565 GN=GLU-1D-1D PE=3 SV=5	90.238	6.4849	570.347	59	30.8962	6.2549	742	17.6805	1514.73	1.9662	7.4717	(Y)SSYHVSVEHQAASL(K)		276840	46	b2b2°b3b3°b4b4°b5b5°b6b6°b7b7°b8b8°b9b9°b10b10°b11b11°b12b13b13°b14b14°y1y2y2°y3y3°y4y4°y5y6y6*y7y7°y8y9y9°y10y10°y11y11°y12y12°	9.0775
	P08489	Glutenin_ high molecular weight subunit PW212 OS=Triticum aestivum OX=4565 PE=3 SV=1	89.119	5.7773	559.179	66	39.7375	6.7092	1052	17.5866	1177.6	1.7875	7.1524	(Y)HVSVEHQAASL(K)		314901	34	b1b2b3b3°b4b4°b5b5°b6b6°b7b7°b8b9b9*b9°b10b10°b11b11°y1y2y2°y3y3°y4y4°y5y6y6*y7y7°y9°y10°	6.8549
											1515.71	2.6277	7.1488	(Y)SSYHVSVEHQAASL(K)	Deamidation Q (10)	119004	32	b2b3°b4b4°b5b5°b6b6°b7b7°b8b8°b9b10b10°b11b12b13b13°y1y2y3y4y4°y5y7y8y9y10y11y11°y13	10.0732
											1802.91	2.2991	7.1466	(L)KRYYPSVTSPQQVSY(Y)		376318	44	b1b2b3b4b5b6b6°b7b8b8°b9b9°b10°b11b11°b12b12°b13b14b14*b14°b15b15*y1y2y2°y3y3°y4y4°y5*y6y7y7°y8y8*y9°y11y11*y11°y12y12°y14y14°	10.3929
											580.298	-0.1462	7.1188	(Y)YPTSL(Q)		23604.4	10	b2b3b3°b4y1y2y3y4y4°y5	5.9346
											583.384	5.0687	7.086	(W)GIPALL(K)		353716	11	b2b3b4b5b6y1y2y3y4y5y6	7.9205
											1178.58	2.8154	6.9405	(Y)HVSVEHQAASL(K)	Deamidation Q (7)	125189	33	b1b2b3b3°b4b4°b5b5°b6b7b7°b8b8°b9b9°b10°b11b11*y1y2y2°y3°y4y4°y5y5°y6y6*y6°y7y7°y9°y10	9.5572
											769.463	2.6592	6.9225	(F)WGIPALL(K)		269743	12	b1b2b3b4b5b6b7y2y3y4y5y7	11.5336
											1803.9	3.9724	6.8782	(L)KRYYPSVTSPQQVSY(Y)	Deamidation Q (11)	200019	38	b2b3b4b6b6°b7b7°b8b8°b9b9°b11b11°b12b12°b13b13*b13°b14b14°b15b15°y1y2y2°y3y3°y4y4°y5°y6y7y7*y7°y8y9y11y11°	11.6542
											1636.8	1.4043	6.7195	(W)LQPGQGQQGYYPTSL(Q)		52617.6	25	b2*b4b5b5*b6*b7*b8b8*b10b11b12y1y2y2°y3y4y4°y5y7°y8y8*y9*y11y13y15	13.5757
											1075.52	-1.5591	6.7178	(W)LQPGQGQQGY(Y)		9624.64	17	b2b2*b4b5b5*b7b7*b8b8*b9y1y2y3y4*y6y8y8*	12.4504
											2959.34	0.6331	6.7129	(W)QQSGQGQHGYYPTSPQLSGQGQRPGQW(L)	Deamidation Q (2), Deamidation Q (26)	121277	34	b4b4*b5b8*b8°b9*b10°b11°b14b16b16°b17°b23b24*b25b26°b27y2y4y5y6y7*y10y10*y11°y13y14y16y16*y17°y23y25y26y26*	18.2536
											2038.89	5.0701	6.7129	(W)YYPTSPQESGQGQQPGQW(Q)	Deamidation Q (13)	44307.3	26	b2b5b5°b7b7°b8b11b14b14°b16b17y1y4y5y7y7*y8*y10y11y12y12°y13y13°y14y16°y18	12.3223
											1223.54	1.9927	6.5045	(W)QQPGQGQPGYY(L)	Deamidation Q (2)	27521.1	13	b1b2*b4b5*b6b7b10y1y4y6y9y10y10*	13.1916
											2037.9	3.3109	6.4926	(W)YYPTSPQESGQGQQPGQW(Q)		18918.5	16	b2b4b5b7b8b14b14°b18y2y4y5y7y8y11y13y15*	16.098
											1523.7	-6.7732	6.4714	(L)QPGQGQQGYYPTSL(Q)		11933.8	24	b1b2*b4*b5b6b6*b7b8b9b9*b10b13*y1y2y4y4°y5y6y7y8y8*y10y12*y14	19.1298
											1637.79	5.5392	6.3923	(W)LQPGQGQQGYYPTSL(Q)	Deamidation Q (7)	73228.2	16	b5b7b10b10*b11b13y2y3y4y4°y5y5°y6y10y14°y15	11.2064
											1539.74	-2.0191	6.3537	(L)QLGQGQQGYYPTSL(Q)		1047.75	27	b1b2*b3b5b5*b6b6*b7*b8*b9*b10*b12*b13b14*y1y2y2°y3y4y4°y5y5°y6°y9°y10y11*y12*	19.9858
											1524.69	-5.3633	6.3345	(L)QPGQGQQGYYPTSL(Q)	Deamidation Q (1)	4296.13	23	b4b4*b7b8b14*y2y2°y3y3°y4y4°y5y7y8y10y10*y11y11°y12y12°y13y13°y14	21.2697
											1804.89	10.407	6.2646	(L)KRYYPSVTSPQQVSY(Y)	Deamidation Q (11), Deamidation Q (12)	81698	24	b2b3b4b6°b7b8°b9b9°b11b11°b12b12°b13b13°b14*b15°y2y2°y4°y6y7y7*y8y13°	14.6026
											1355.65	0.9143	6.2547	(Y)YPSVTSPQQVSY(Y)		35595	17	b2b3b3°b4b4°b5b6b6°b8b9°b10b10*b10°b11y1y2y5°	13.2499
											2959.33	-2.7119	6.2065	(W)QQSGQGQHGYYPTSPQLSGQGQRPGQW(L)	Deamidation Q (20), Deamidation Q (22)	6736	37	b1b3b3°b4b6b6°b8b8*b9b9*b10b14*b15°b17b21b23°b25y5y6*y8*y9y9*y10y10°y11°y13y13*y14y14°y15°y16y16*y17y17°y20y20°y22*	19.4664
											1222.55	-1.9937	6.1629	(W)QQPGQGQPGYY(L)		3753.45	12	b5*b7*b9*b10*y1y2y4y5*y6y7y9y11*	20.0885
											1223.53	1.6355	6.1592	(W)QQPGQGQPGYY(L)	Deamidation Q (5)	6628.37	10	b2b6b7b7*b10*b11*y4y8*y9y11*	13.1307
											3001.34	0.3933	6.1185	(Y)YPGQASPQRPGQGQQPGQGQQSGQGQQGY(Y)	Deamidation Q (14), Deamidation Q (15)	585	28	b2b4b4*b6b6*b10b11*b14*b16b19*b20°b21°b22b22*b28y3y5y7y13y14y14°y16y16*y17°y18y23°y27*y29*	22.0377
											1224.51	-3.3486	6.0805	(W)QQPGQGQPGYY(L)	Deamidation Q (1), Deamidation Q (2)	14350.6	9	b1b3b7y1y3y4y5y10*y11*	12.9696
											1845.76	3.5595	6.0674	(L)QQTGQGQQSGQGQQGYY(S)	Deamidation Q (1), Deamidation Q (2), Deamidation Q (13)	20059.4	12	b7b8b11°b13b13°b14b14°y3y9y10°y12°y13	22.1506
											4271.89	-4.021	6.0517	(Y)YPGQASPQRPGQGQQPGQGQQSGQGQQGYYPTSPQQPGQW(Q)	Deamidation Q (4), Deamidation Q (21), Deamidation Q (35)	72644	23	b4b5*b10°b13*b16b16*b21°b23b23°b27*b28°b29*b32y4*y5*y7y13y18°y19y20y22°y28y28°	19.9586
											1077.48	0.1145	6.0486	(W)LQPGQGQQGY(Y)	Deamidation Q (5), Deamidation Q (8)	7760.73	7	b4*b5*b7b7*b8b10y8	16.8598
											2039.87	5.9277	5.9549	(W)YYPTSPQESGQGQQPGQW(Q)	Deamidation Q (14), Deamidation Q (17)	44341.5	14	b5b5°b8b8°b14b14°b16°b18°y5y7y10y13y16*y18*	19.8731
											1224.52	4.0774	5.9538	(W)QQPGQGQPGYY(L)	Deamidation Q (2), Deamidation Q (7)	12494.4	9	b3*b4*b6*b7b10y1y9y10y11*	16.6825
											1843.79	2.0486	5.9438	(L)QQTGQGQQSGQGQQGYY(S)	Deamidation Q (7)	7818.84	14	b5°b6*b7b7°b8*b9b11b12b13b13*b14b15y5y7	18.1535
											771.463	2.6406	5.9186	(Y)LTSPLQL(G)		3443.23	11	b3°b5b6°b7°y2y2*y3*y4y4*y5y7	15.5443
											693.383	1.2022	5.9158	(Y)YLTSPL(Q)		9347.74	7	b2b3b3°b4°b5y3y6	14.7318
											1654.81	2.8999	5.9012	(Y)LTSPQQSGQGQQPGQL(Q)	Deamidation Q (5)	5048.19	10	b4b4°b8b12b14y2y4y4*y7*y13	29.4428
											1948.86	4.8965	5.8876	(W)QQPGQWQQPGQGQPGYY(L)	Deamidation Q (1), Deamidation Q (8)	24287	12	b7b11*b13y1y2y4y5y6*y10y11y13y17	21.7947
											2576.2	-0.8411	5.8687	(W)LQPGQGQQGYYPTSPQQSGQGQQL(G)	Deamidation Q (2)	4865	11	b2b10b11y3*y4y7y10y12*y13y16*y22	25.2391
											2970.35	-0.8256	5.8618	(Y)YPTSLQQPGQGQQPGQWQQSGQGQHGY(Y)		12294	12	b3°b4°b5°b11b20*b22b25b27y4y14°y19y23°	23.7388
											3002.32	-2.6189	5.8276	(Y)YPGQASPQRPGQGQQPGQGQQSGQGQQGY(Y)	Deamidation Q (14), Deamidation Q (15), Deamidation Q (26)	9779	12	b13b14b21b21*b24b26y1y8y8°y11°y14y29	15.415
											2957.37	2.0857	5.7695	(W)QQSGQGQHGYYPTSPQLSGQGQRPGQW(L)		34726	12	b5b10b10°b11*b13*b20b22*y8*y12y14y15y26°	24.8314
											1949.84	3.3525	5.6755	(W)QQPGQWQQPGQGQPGYY(L)	Deamidation Q (5), Deamidation Q (7), Deamidation Q (8)	17112	14	b1b2b4b5b8b13*b15*y4y5y6*y7y13y14y17*	21.0021
											2181.9	2.1529	5.6323	(L)QQTGQGQQSGQGQQGYYSSY(H)	Deamidation Q (13), Deamidation Q (14)	7346.24	11	b1b3°b4b5b6b8b14°b16*y4y7y9	18.4471
											2764.22	8.901	5.4978	(W)YYPTSPQESGQGQQPGQWQQPGQW(Q)	Deamidation Q (13), Deamidation Q (14)	5755	15	b4b9b12*b14b14*b16°b17°y1y3*y4y5y7*y8*y17*y24	24.242
											2110.04	1.622	5.487	(L)RDISPECHPVVVSPVAGQY(E)	Carbamidomethyl C (7)	2555.29	7	b8b13b13°y2*y15°y16y16°	13.9441
											877.472	4.5407	5.4739	(L)QQRIFW(G)		8417.07	5	b3b3*b5y5y6	9.924
											2578.17	1.9576	5.4714	(W)LQPGQGQQGYYPTSPQQSGQGQQL(G)	Deamidation Q (2), Deamidation Q (16), Deamidation Q (20)	4782	10	b2b4b6b14y5*y7y7*y8*y13*y24	22.6564
											1525.67	-3.9348	5.46	(L)QPGQGQQGYYPTSL(Q)	Deamidation Q (1), Deamidation Q (6)	555.498	12	b10y1y7y8y8°y9y10y11y11°y12y12°y13*	15.5814
											1899.9	1.0117	5.4454	(Y)YPTSLQQPGQGQQPGQW(Q)		1123.81	6	b3°b12y2*y3y3*y4*	27.6089
											1844.78	4.2255	5.4335	(L)QQTGQGQQSGQGQQGYY(S)	Deamidation Q (1), Deamidation Q (2)	18671.6	7	b7b9b13°b15*y3y13y15*	14.9069
											1637.78	0.4371	5.4318	(W)LQPGQGQQGYYPTSL(Q)	Deamidation Q (5)	382.866	9	b2b2*b4b6*b12*y2y9y13°y14	21.4
											1594.71	-0.9493	5.4287	(Y)YPTSPQQSGQGQPGY(Y)		1394.73	4	b2y3y5*y8*	27.4411
											2959.32	-4.3352	5.4253	(W)QQSGQGQHGYYPTSPQLSGQGQRPGQW(L)	Deamidation Q (16), Deamidation Q (20)	6844	6	b8b11b15°b18y11°y12*	10.3877
											3907.8	-5.0321	5.4189	(L)QQPAQGQQPGQGQQGRQPGQGQPGYYPTSSQLQPGQL(Q)	Deamidation Q (31), Deamidation Q (33), Deamidation Q (36)	2668	13	b3b3*b17b20*b21b28°b30°y7*y8y15*y15°y18*y29	18.5236
											931.425	-1.5329	5.4018	(L)QPGQGQPGY(D)		750.349	3	y3y4y8	25.6989
											1540.73	3.9577	5.3787	(L)QLGQGQQGYYPTSL(Q)	Deamidation Q (4)	13147.3	4	b3*b6*b10b11	24.7948
											4338.99	7.1941	5.3784	(Y)YPSVTSPQQVSYYPGQASPQRPGQGQQPGQGQQSGQGQQGY(Y)	Deamidation Q (16), Deamidation Q (24), Deamidation Q (27)	857	10	b9b13b13°b16*b18°b22b29y2y26y33°	29.2047
											2763.22	6.2086	5.3495	(W)YYPTSPQESGQGQQPGQWQQPGQW(Q)	Deamidation Q (23)	4817	7	b2b4b11b14b20y2y19°	26.0631
											2406.06	4.4944	5.3472	(Y)YPTSLQQTGQGQQSGQGQQGYY(S)	Deamidation Q (16), Deamidation Q (18)	4034.62	6	b6°b7b15°y6y16y18	23.5354
											1654.81	5.1452	5.3178	(Y)LTSPQQSGQGQQPGQL(Q)	Deamidation Q (5)	1557.1	7	b4°b16*y1y3*y4y13*y16	9.71
											2971.33	-0.9574	5.3133	(Y)YPTSLQQPGQGQQPGQWQQSGQGQHGY(Y)	Deamidation Q (6)	2643	6	b5b10°b11*y5y11y13	10.7685
											2595.25	0.565	5.3078	(M)DQQLRDISPECHPVVVSPVAGQY(E)	Carbamidomethyl C (11), Deamidation Q (22)	2603.15	9	b5*b12°b13b13°b15b21*y1y12°y22	22.5102
											1447.67	9.7008	5.2809	(L)GQWLQPGQGQQGY(Y)	Deamidation Q (2)	572.59	5	b4b5*b13*y7y9*	11.0586
											1947.86	1.2718	5.2785	(W)QQPGQWQQPGQGQPGYY(L)	Deamidation Q (7)	1617	7	b6*b8*b13*y5*y7*y9*y16	25.4948
											1595.7	-1.1591	5.2566	(Y)YPTSPQQSGQGQPGY(Y)	Deamidation Q (12)	523.022	5	b7b10y10y11*y15*	16.04
											2702.22	-5.8784	0	(Q)SGQGQHGYYPTSPQLSGQGQRPGQW(L)	Deamidation Q (24)	2069	2	b2b16°	37.5061
											2941.32	-1.6553	0	(W)QQSGQGQHGYYPTSPQLSGQGQRPGQW(L)	Deamidation Q (2), Deamidation Q (26)	939	0		0
950	W5BCV7	Uncharacterized protein OS=Triticum aestivum OX=4565 PE=3 SV=1	56.565	7.7827	304.846	4	6.4961	12.5466	56	18.0549	826.504	0.4493	6.5838	(W)QLPVIGSL(H)		0	21	b1b2b2*b3b4b4*b5b5*b7b7°b8b8*y2°y3y3°y4y4°y5y6y6°y8	9.5536
	A0A1D5SFD0	Uncharacterized protein OS=Triticum aestivum OX=4565 PE=3 SV=1	55.858	6.0938	278.033	6	6.1508	21.6495	70	19.8486	827.487	-0.6598	6.4756	(W)QLPVIGSL(H)	Deamidation Q (1)	0	11	b2b3b4b5b8y3y4y4°y6y6°y8	9.9059
	A0A1D5T3S4	Uncharacterized protein OS=Triticum aestivum OX=4565 PE=4 SV=1	43.257	6.6138	267.965	3	4.1344	5.209	37	13.2846	1016.53	-6.6072	5.1973	(Y)DVQRGTQVL(V)	Deamidation Q (3)	703	9	b4*b6°b7*b8*b8°y5°y7°y9y9*	18.6975
											1015.55	0.429	4.9556	(Y)DVQRGTQVL(V)		2983	7	b2b6*b8*b9°y4°y6*y9*	25.0653
											532.287	-19.8004	4.8986	(W)AISEL(I)		1196	4	b3b4°y2y4	8.1652
											980.545	36.371	4.5892	(L)AGQLPHRAM(R)		688	5	b2b3*b4*y3y9	32.8279
969	A0A1D6D1Q3	Pyrophosphate--fructose 6-phosphate 1-phosphotransferase subunit beta OS=Triticum aestivum OX=4565 GN=PFP-BETA PE=3 SV=1	60.519	5.7729	367.63	19	29.1071	6.9274	155	17.4406	628.439	-0.2496	6.3874	(L)KIGVVL(S)		8206	8	b1b2b3b4b5y2y5y6	11.6749
	A0A1D6CH78	Pyrophosphate--fructose 6-phosphate 1-phosphotransferase subunit beta OS=Triticum aestivum OX=4565 GN=PFP-BETA PE=3 SV=1	69.796	7.0444	253.523	16	23.125	2.9272	132	18.283	1404.79	3.4734	6.1713	(W)KSKLEPASRELF(D)		9707	15	b1b2b2°b3b4°b5b5°b12y5y7y7°y8y8°y9y11	11.1089
											1918.08	4.4432	6.113	(Y)SEVQTSRIAHALPLPSVL(R)		7930	13	b8b10b11b12b14b16b17y2y4y4°y6y7y8	15.1791
											1877.01	2.339	6.057	(Y)GQPSAAVVPSAEPVETKPL(K)		12029	17	b2b2*b5b5°b6b7b7°b8b8°y3y7y10y11y12y13y14y19	17.0628
											618.348	3.803	6.0098	(W)TVGGTAL(T)		7018	13	b4°b5b5°b6b6°b7y2y3y3°y4°y5y5°y7	11.7685
											858.476	4.3147	5.9941	(Y)ISPGPIQF(S)		6450	12	b3°b6b6°b7b8y2y2*y4y5y6y7y8	16.9594
											1877.99	2.4578	5.976	(Y)GQPSAAVVPSAEPVETKPL(K)	Deamidation Q (2)	6497	13	b5b6b7b7°b8b11°b14y10y11y12y13y14y19	16.9463
											1074.5	2.6442	5.8626	(F)GFDTACKIY(S)	Carbamidomethyl C (6)	6358	9	b4b5b6b7b8b8°y1y4y7	21.2928
											1331.73	3.9013	5.6314	(F)DFLPKTIQEQL(L)		4335	10	b2b3b6b11*y2*y3°y4*y8y8*y11	15.6703
											1919.06	2.3924	5.5342	(Y)SEVQTSRIAHALPLPSVL(R)	Deamidation Q (4)	2815	7	b2°b5°b12b14y4y4°y6	25.2293
											1346.66	3.7901	5.4802	(Y)VELTTDFVYPY(R)		567	4	b9y2y3y9	14.0738
											1822.78	3.6357	5.4681	(F)GYEGRCGLPTNFDSSY(C)	Carbamidomethyl C (6)	2013	7	b8b8°b10°y1y2y8y16	15.207
											920.468	1.9269	5.4353	(Y)GFKGGPAGVM(K)		3525	5	b5b7b9y1y8	18.3188
											501.304	1.2396	5.3803	(Y)GAGALL(Q)		4261	3	b3b4b5	31.6049
											1925.79	3.3509	5.1362	(Y)EGRCGLPTNFDSSYCY(A)	Carbamidomethyl C (4), Carbamidomethyl C (15)	387	5	b3b4°b6b8y16	20.5001
											876.419	-2.7202	4.9502	(F)ASLRDEW(A)		2971	5	b2°b4b5b7y5	21.9391
											1679.76	-26.2871	4.845	(M)ICSGRDKIETPEQF(Q)	Carbamidomethyl C (2)	362	5	b6°b8°y5*y6*y10	25.4832
											1098.51	-2.2268	4.7276	(F)RGQSHFFGY(E)		600	4	b4*b5b6*y1	18.9968
											497.348	7.7436	0	(L)KIGVV(L)		1747	0		0
1051	W5FPA9	Uncharacterized protein OS=Triticum aestivum OX=4565 PE=4 SV=1	18.037	6.2432	345.704	2	6.4516	27.9391	43	18.6384	709.351	-1.4727	5.9788	(Y)LNTQSF(K)		9050	18	b2b3b3°b4b4*b5b5*b5°b6b6*y2y3y3°y4y4°y5*y5°y6	17.4917
	A0A1D5RRQ5	Uncharacterized protein OS=Triticum aestivum OX=4565 PE=3 SV=1	56.448	8.9209	228.399	2	1.5595	3.4987	33	11.7379	656.472	1.7797	5.7141	(L)VIAKIL(H)		4173	8	b2b3b4b5y2y3y4y6	11.4169
	I6QQ39	Globulin-3A OS=Triticum aestivum OX=4565 GN=Glo-3A PE=2 SV=1	66.284	8.2749	143.489	12	17.0068	6.0248	156	22.003	985.55	3.1762	5.6621	(L)HTISVPGKF(Q)		8527	10	b2b3b3°b4°b5b5°y2y3y4y6	16.0577
											1262.63	0.4645	5.5407	(F)VVPGLTDADGVGY(V)		16902	11	b2b8°b9b10b10°b12y1y2y6°y10y11	25.3694
											2050.04	-3.4847	5.4951	(Y)VAQGEGVLTVIENGEKRSY(T)	Deamidation N (13)	2516	17	b2b3b4*b5*b10b13°b15y4y6y7y8y9y9°y10y11y12y16	24.6105
											1418.76	1.3049	5.3755	(Y)RVAIMEVNPRAF(V)	Oxidation M (5)	8870	10	b1b3b4b8y2y4y5y5*y6y7°	22.7955
											1287.68	-1.3675	4.9489	(F)GRPAREVQEVF(R)		8297	12	b2b5b7b8*b9*y3y5°y6*y8*y9y9*y11	28.7808
											2050.05	3.0189	4.7979	(Y)VAQGEGVLTVIENGEKRSY(T)	Deamidation Q (3)	4422	13	b2b3*b4b4*b7b9*b13*y3y3°y9y9°y11y11*	18.2225
											1435.77	-1.8298	4.7825	(Y)ETVRARVSRGSAF(V)		10564	5	b4b13y1y7y12°	15.3024
											1415.7	1.1608	4.776	(F)EINAERNERVW(L)		10039	14	b3°b5°b6b8b8°b9y1y5y5*y6*y7*y8*y9*y10	25.3267
											1402.77	2.8364	4.7566	(Y)RVAIMEVNPRAF(V)		7209	7	b1b4b6y2y4y7y11	25.624
											444.321	6.2422	0	(I)AKIL(H)		945	3	b2b3b4	16.8831
1169	A0A1D6S518	UTP--glucose-1-phosphate uridylyltransferase OS=Triticum aestivum OX=4565 PE=3 SV=1	51.632	5.0244	943.288	30	49.8943	3.1737	373	18.0171	1925.08	3.5473	7.0837	(L)KMEIIPNPKEVDGVKVL(Q)	Oxidation M (2)	29218	24	b1b2b3b3°b4b4°b5b6b7b7*b9*b9°b12b14b15b16b17y2y3y5y6y8y10y12	18.1763
	A0A1D5Z315	UTP--glucose-1-phosphate uridylyltransferase OS=Triticum aestivum OX=4565 PE=3 SV=1	60.041	5.6455	928.888	28	42.3698	3.2497	361	17.7176	1123.6	-0.6936	7.04	(L)ADVKGGTLISY(E)		31920	20	b2b3b4b4°b5b5°b7b8b8°b9b10b10°y1y2y2°y3°y6y6°y9y10°	21.7945
	A0A1D6S517	UTP--glucose-1-phosphate uridylyltransferase OS=Triticum aestivum OX=4565 PE=3 SV=1	59.663	5.9619	928.888	28	42.6763	3.2497	361	17.7176	667.335	7.6478	6.9998	(Y)TLVDGY(V)		35243	14	b2b3b3°b4b5b5°b6y1y2y3y3°y4y4°y6	5.6333
	A0A1D6S519	UTP--glucose-1-phosphate uridylyltransferase OS=Triticum aestivum OX=4565 PE=3 SV=1	49.838	5.0039	928.888	26	47.9212	3.2823	348	17.5089	1161.56	5.5059	6.9483	(Y)SNSNIEIHTF(N)		38775	29	b1b1°b2b2*b2°b3b3*b3°b4b4°b7b9b10b10°y1y2y2°y3y3°y4y4°y5y5°y6y6°y7y7°y8y8°	15.508
	W5FGH0	UTP--glucose-1-phosphate uridylyltransferase OS=Triticum aestivum OX=4565 PE=3 SV=1	51.648	5.0244	928.888	28	49.8943	3.2497	361	17.7176	1326.81	2.793	6.8838	(L)KAIKRLVDAEAL(K)		35852	24	b1b2b3b4b5b6b7b8b9b10b10°b11b11°b12y1y2y3y3°y5°y8y9y9°y10y11	10.5934
	A0A1D5YGH1	UTP--glucose-1-phosphate uridylyltransferase OS=Triticum aestivum OX=4565 PE=3 SV=1	59.645	5.9648	928.888	28	42.8312	3.2497	361	17.7176	1590.78	0.993	6.582	(F)NTHDDTQKIVEKY(S)		13870	20	b4b4*b4°b5b6°b7b7*b8b8°b9b9°b10b11b12y2y3y3°y4y10y11	21.012
	A0A1D5U0C6	Uncharacterized protein OS=Triticum aestivum OX=4565 PE=4 SV=1	25.879	6.7383	776.484	6	18.6441	2.8973	93	17.9106	837.439	4.0298	6.5295	(L)LVQSDLY(T)		9846	12	b2b3b4b5b5°b6b6°b7y2y5y5°y7	13.0307
											632.309	2.9824	6.4865	(Y)GCSVPL(L)	Carbamidomethyl C (2)	24651	9	b2b3b3°b4b4°b5y2y3y6	11.6859
											1243.58	-1.4245	6.4465	(L)ENKDINGPEDL(-)		25673	22	b2°b4b4°b5b5°b6b6*b7°b9*b10°b11y1y2y2°y4y4°y5y6y6°y8y8°y9	18.5951
											1576.81	2.4449	6.3549	(W)SKIQTPTDEVVVPY(D)	Deamidation Q (4)	22490	10	b4b5b5*b5°b9b12b12*y2y3y14	16.1787
											1162.54	0.8955	6.3332	(Y)SNSNIEIHTF(N)	Deamidation N (4)	8234	15	b1b2b2*b2°b3*b4*y1y3y3°y4°y5y6y8y8°y10	16.424
											1056.63	-0.4119	6.1516	(F)LPVKATSDLL(L)		14711	8	b4b5b6b8b10y1y7°y9°	17.0185
											1575.83	2.577	6.1329	(W)SKIQTPTDEVVVPY(D)		37976	15	b2b3b3°b4b4*b5b5°b8°b9°b11°y1y2y3y9y14	14.4022
											1246.57	0.9967	6.1303	(L)NHLITNQNEY(C)	Deamidation N (6)	1477	6	b2b3b4b7b9y1	9.927
											1161.55	3.8641	6.048	(Y)LSGEAEQIEW(S)		6523	8	b4°b7b7°b8b9b9*y1y7	18.5103
											1620.82	0.0942	6.0291	(M)GCTGPKSVIEVRNGF(T)	Carbamidomethyl C (2)	3066	9	b8°y4*y5y6y7y8y9y11y12	24.6257
											1527.7	0.3052	5.9672	(L)EIAQVPDEHVNEF(K)	Deamidation Q (4)	2154	10	b2b3°b4b4*b4°b5y5y6°y8y9°	14.544
											1094.52	1.1866	5.905	(Y)CMEVTPKTL(A)	Carbamidomethyl C (1), Oxidation M (2)	4697	7	b2b3b5°b8y2y3y4	20.636
											1591.76	3.0593	5.7843	(F)NTHDDTQKIVEKY(S)	Deamidation Q (7)	7153	11	b4*b6°b7b7°b8b10b11y2y3y11y13*	17.3097
											1526.72	5.6837	5.7666	(L)EIAQVPDEHVNEF(K)		3291	10	b3°b4°b5*b10°b12y6*y6°y7*y8y8°	26.3808
											1078.53	-1.2681	5.7247	(Y)CMEVTPKTL(A)	Carbamidomethyl C (1)	3993	5	b2b3b4°y2y4	19.9667
											1087.55	-0.062	5.6801	(F)NTNNLWVNL(K)		1303	7	b2b3°b5*b7b7°b9*y2*	14.3925
											1486.85	1.2001	5.6691	(F)EKAIGINVPRSRF(L)		6914	7	b7b13y3y6°y7*y9*y12°	16.8973
											1247.67	-1.1882	5.6407	(L)QLETAAGAAIRF(F)		1904	13	b1b2*b3°b4*b4°b5b5°b7*b10*b11y6y7y8	22.0153
											1649.95	1.4739	5.6318	(M)EIIPNPKEVDGVKVL(Q)		6646	5	b2b3b14b15y14	29.4728
											837.483	0.0716	5.6313	(F)ISLVSRY(L)		2284	5	b3°b7y2y5y6	27.9212
											2320.26	-5.576	5.5991	(Y)VIRNPARVKPSNPSIELGPEF(K)		6734	9	b4b17b18y2y2°y3y4y5y16°	15.7505
											1244.57	1.6374	5.5723	(L)ENKDINGPEDL(-)	Deamidation N (2)	6864	9	b2b5*b7°b9°b10*b10°y2y5y6*	18.9005
											943.545	-0.9139	5.4023	(F)LPVKATSDL(L)		6622	7	b4b7b8b9y1y5°y6	16.9176
											1195.72	1.6845	0	(L)KAIKRLVDAEA(L)		2363	7	y2°y3°y4°y7°y8y8°y10°	22.0919
1289	W5FPA9	Uncharacterized protein OS=Triticum aestivum OX=4565 PE=4 SV=1	18.037	6.2432	297.488	2	9.6774	3.864	30	19.4269	826.502	-1.087	6.5013	(W)QLPVIGSL(H)		37765	20	b2b2*b3b3*b4b4*b5b5*b7b7°b8b8°y2°y3y4y4°y5y6y6°y8	8.5951
	A0A1D5W2I0	Uncharacterized protein OS=Triticum aestivum OX=4565 PE=3 SV=1	57.245	7.3726	270.583	6	13.189	20.8019	69	20.3472	827.487	-0.7519	6.3716	(W)QLPVIGSL(H)	Deamidation Q (1)	11190	15	b2b3b4b5b7b7°b8b8°y2°y3y3°y4y6y6°y8	14.5417
	A0A1D5U5R5	Uncharacterized protein OS=Triticum aestivum OX=4565 PE=4 SV=1	42.587	9.9771	251.502	4	10.9091	2.5134	48	14.2535	1953.04	3.6512	5.0675	(L)RDVAEAAAATRPVEMRPL(L)		1811	8	b3b4b5b8b10°b11°b13y8	25.8022
	A0A1D5WXL6	Uncharacterized protein OS=Triticum aestivum OX=4565 PE=3 SV=1	37.795	9.4087	101.875	3	12.6615	4.1872	37	17.5633	1659.85	-0.4549	4.9171	(L)DRSMKLVAGFNPPDL(W)		402	5	b7°b9°y3y6y8*	25.128
											1012.46	-23.316	4.8902	(-)MQIMEVVY(L)		1937	4	b3b5*y2y5	23.5888
											2115.28	44.1827	4.6541	(L)IRNPKVMQKVTAEVRQAF(E)		620	6	b1b2b6*y3y6*y12	32.8272
1581	A0A1D5ZBL7	Uncharacterized protein OS=Triticum aestivum OX=4565 PE=3 SV=1	43.097	5.502	438.19	7	13.8191	2.8979	67	18.1525	1447.76	0.8578	6.5411	(F)VLADASSTGGPRVAF(A)		10905	23	b2b3b4b5b6b6°b8b9°y2y5y6y7y8y8°y9y10y10°y11y11°y12y13y14y15	20.2433
											665.351	0.7995	6.1087	(F)SPVSLY(S)		5541	12	b2b2°b3b3°b4b4°b5b5°b6°y2y3y6	7.6197
											1153.6	-0.4754	5.8389	(F)MGHVVNPLLSS(-)		3411	6	b3b4b5b6b8b9	17.1721
											1169.6	-0.5271	5.6464	(F)MGHVVNPLLSS(-)	Oxidation M (1)	2132	9	b3b4b5b6b7*b8*y2y6°y7*	22.1671
											1346.77	-0.6215	5.6267	(F)LVREDISGVVLF(M)		4206	6	b5b8b9b10y1y2	9.5708
											1163.6	2.8087	5.5491	(Y)LLDGSSVQTPF(M)		1821	8	b2b4°b9b9°b11y1y3y4	18.0364
											2481.34	-6.9735	5.2142	(F)LVREDISGVVLFMGHVVNPLLSS(-)		692	3	y7°y11*y17*	0
1649	M9TG60	Gamma-gliadin 1 OS=Triticum aestivum OX=4565 PE=2 SV=1	38.837	7.8589	928.791	21	25.0737	3.3466	254	16.5881	930.49	1.0008	7.3042	(F)ASIVADIGGQ(-)		80256	33	b2b2°b3b3°b4b4°b5b5°b6b6°b7b7°b8b8°b9b9°b10b10°y1y1*y2y2*y3y3*y4y4*y5y6y6°y7y7°y8y8°	10.2377
											1439.64	0.5104	7.1555	(Y)LQQQMNPCKNY(L)	Oxidation M (5), Carbamidomethyl C (8)	19096	28	b2b2*b3b4b5b5*b6b6*b7b7*b8*b9y1y2y2*y3y3*y4y4*y5y5*y6y6*y7y8*y9y9*y11	22.106
											1440.63	2.0426	7.0644	(Y)LQQQMNPCKNY(L)	Deamidation Q (4), Oxidation M (5), Carbamidomethyl C (8)	22025	21	b2b2*b4b4*b5b6b6*b8y1y2y2*y3y4y4*y5y5*y6y7y8y9y11	13.8641
											931.476	3.3028	6.8228	(F)ASIVADIGGQ(-)	Deamidation Q (10)	47810	27	b3°b4b4°b5b5°b6b6°b7b7°b8b8°b9b9°b10b10°y1y3y4y4*y5y5°y6y6*y7y8y8*y10	15.2213
											1234.63	-1.0614	6.694	(M)ILPRSDCKVM(R)	Carbamidomethyl C (7), Oxidation M (10)	10350	9	b2b6b7b8b9y1y2y4y8	11.9795
											716.43	-0.7129	6.6792	(L)EVIRSL(V)		16823	12	b2b2°b3b4b4°b5b6y2y3y4y4°y5	9.8931
											798.438	2.8632	6.5523	(L)AQIPQQL(Q)	Deamidation Q (5)	12326	12	b2b2*b5b6b7y1y2*y3y4y4*y5y7	17.6826
											928.583	0.163	6.4483	(L)EVIRSLVL(G)		6734	13	b4b4°b5b5°b6b6°b7b7°b8y1y2y6y8	17.7288
											1333.66	8.3008	6.427	(F)VPPECSTTKAPF(A)	Carbamidomethyl C (5)	54420	13	b2b3b4b8b9b10b10°y2y3y4y7y8y12	13.528
											797.456	5.6433	6.3072	(L)AQIPQQL(Q)		9919	11	b3b4*b5b6b6*y2y2*y4y4*y5y7	21.4787
											798.438	3.6777	6.2385	(L)AQIPQQL(Q)	Deamidation Q (2)	4287	10	b4b6y1y2y2*y3y4*y5y7y7*	16.3742
											1218.63	0.9618	6.2049	(M)ILPRSDCKVM(R)	Carbamidomethyl C (7)	4130	5	b6b8b9y2y8	19.7323
											1423.65	2.3528	6.0466	(Y)LQQQMNPCKNY(L)	Carbamidomethyl C (8)	4670	11	b2b2*y2y2*y4y5y5*y6y8*y9y9*	16.7972
											1367.67	1.5202	5.9692	(L)VLGTLPTMCNVF(V)	Oxidation M (8), Carbamidomethyl C (9)	4178	7	b4b5b5°b8°y1y4*y7	16.3227
											1567.77	2.2969	5.9474	(L)VSMILPRSDCKVM(R)	Oxidation M (3), Carbamidomethyl C (10), Oxidation M (13)	9024	8	b3b4b5b5°b12y2y8y8°	21.5723
											1425.61	-4.8805	5.9392	(Y)LQQQMNPCKNY(L)	Deamidation N (6), Carbamidomethyl C (8), Deamidation N (10)	1923	6	b3b5*y1y4y5y6	16.3623
											722.377	2.5828	5.8694	(L)VSSLVSM(I)		3528	9	b2b3b3°b4b4°b5°b6y2y7	15.6515
											1172.6	1.5251	5.8344	(Y)LLQQCNPVSL(V)	Carbamidomethyl C (5), Deamidation N (6)	2358	6	b3*b9*b10°y2°y4°y9°	0
											1008.46	-1.1594	0	(L)PRSDCKVM(R)	Carbamidomethyl C (5), Oxidation M (8)	2224	8	b2b3b4b5b6b6°b7b7°	18.2497
											560.271	6.7408	0	(V)ADIGGQ(-)		1143	4	b3b4°b6°y5*	18.3279
											992.466	1.0344	0	(L)PRSDCKVM(R)	Carbamidomethyl C (5)	649	1	b7	8.4017
1656	M9TG60	Gamma-gliadin 1 OS=Triticum aestivum OX=4565 PE=2 SV=1	38.837	7.8589	1908.53	38	27.4336	2.6011	509	13.9011	930.489	0.3858	7.9548	(F)ASIVADIGGQ(-)		378657	36	b2b2°b3b3°b4b4°b5b5°b6b6°b7b7°b8b8°b9b9°b10b10°y1y1*y2y2*y3y3*y4y4*y5y5*y6y6°y7y7°y8y8°y9y9°	5.6987
	Q94G92	Gamma-gliadin OS=Triticum aestivum OX=4565 PE=2 SV=1	33.871	8.3086	204.718	6	11.0738	2.9637	70	13.2505	1439.64	-0.5426	7.7041	(Y)LQQQMNPCKNY(L)	Oxidation M (5), Carbamidomethyl C (8)	83246	30	b2b2*b3b3*b4b4*b5b5*b6b6*b7b7*b8b8*b9y1y2y2*y3y3*y4y4*y5y5*y6y6*y7y8y8*y11	11.5153
											931.474	0.6837	7.6478	(F)ASIVADIGGQ(-)	Deamidation Q (10)	264236	28	b2°b3b3°b4b4°b5b5°b6b6°b7b7°b8b8°b9b9°b10b10°y1y2y3y4y5y5°y6y6°y7y8y8°	5.265
											1423.64	-1.1698	7.5632	(Y)LQQQMNPCKNY(L)	Carbamidomethyl C (8)	48900	31	b2b2*b3b3*b4b4*b5b5*b6b6*b7b7*b8*b9b10y2y2*y3y3*y4y4*y5y5*y6y7y7*y8y8*y9*y10*y11	13.0995
											1234.63	0.725	7.4229	(M)ILPRSDCKVM(R)	Carbamidomethyl C (7), Oxidation M (10)	65488	16	b2b4b5b7b8b9b9°b10y1y2y3y4y6y8y8°y9	9.6468
											928.584	1.9534	7.4204	(L)EVIRSLVL(G)		44943.1	19	b2b2°b3°b4b4°b5b5°b6b6°b7b7°b8y1y2y5y5°y6y7y8	7.3052
											1367.67	0.1422	7.3686	(L)VLGTLPTMCNVF(V)	Oxidation M (8), Carbamidomethyl C (9)	27436	18	b2b4b4°b5b5°b8b8°b10b10°b11°y1y2y4y6y7y7*y8y12	9.4635
											722.376	0.7974	7.3484	(L)VSSLVSM(I)		25524	18	b2b3b3°b4b4°b5b5°b6b6°b7y1y2y3y3°y4y4°y5y7	8.3246
											1440.62	-0.8492	7.348	(Y)LQQQMNPCKNY(L)	Deamidation Q (4), Oxidation M (5), Carbamidomethyl C (8)	102891	26	b2b2*b3*b4*b5b6b6*b7*b8b8*b9y1y2y2*y3y3*y4y5y5*y6y6*y7y7*y8y10y11	12.1896
											716.431	1.1992	7.1848	(L)EVIRSL(V)		120899	17	b1b2°b3b3°b4b4°b5b6b6°y1y2y2°y3y3°y4y4°y5	6.0551
											1567.77	1.0604	7.1239	(L)VSMILPRSDCKVM(R)	Oxidation M (3), Carbamidomethyl C (10), Oxidation M (13)	32713	16	b2°b3b3°b4b5b9b11b12b13y1y2y4y8y9y10y12	14.3233
											1218.63	-1.9253	7.1153	(M)ILPRSDCKVM(R)	Carbamidomethyl C (7)	54345	13	b2b4b5b6b7b8b9°y1y2y3y8y8°y9°	14.8371
											798.433	-3.6056	7.0995	(L)AQIPQQL(Q)	Deamidation Q (6)	63971.7	11	b2b3b5b6b7b7*y3y4y4*y5y5*	15.1792
											1424.63	1.3551	7.0782	(Y)LQQQMNPCKNY(L)	Deamidation Q (4), Carbamidomethyl C (8)	51102	17	b3*b4*b5*b6b6*b8b8*y2y3y3*y4y5y5*y6y7y7*y11	9.657
											1425.62	2.9436	6.9938	(Y)LQQQMNPCKNY(L)	Deamidation Q (2), Carbamidomethyl C (8), Deamidation N (10)	43699	16	b1b3b4*b8b9b9*b10y4y5y7y7*y8y8*y9y10*y11	10.8954
											1440.62	-1.4851	6.992	(Y)LQQQMNPCKNY(L)	Oxidation M (5), Carbamidomethyl C (8), Deamidation N (10)	76798	17	b2b2*b4b5b5*b6b6*b9*y1y4y4*y5y5*y8y9y9*y11	13.7065
											1441.61	1.468	6.9738	(Y)LQQQMNPCKNY(L)	Deamidation Q (4), Oxidation M (5), Carbamidomethyl C (8), Deamidation N (10)	47571	18	b2*b3b4b5b5*b6b6*b9*y4y4*y5y5*y6y7y8y9y9*y11	19.3078
											1333.65	0.0465	6.8843	(F)VPPECSTTKAPF(A)	Carbamidomethyl C (5)	242459	19	b2b3b4b5b7b7°b8b9y1y2y3y4y5y7y8y8°y9y9°y12	10.6021
											831.463	-1.8611	6.8746	(L)VLGTLPTM(C)		4112	12	b3b4b4°b5b5°b8y2y3y3°y4y7°y8	15.2452
											1173.58	1.4051	6.7502	(Y)LLQQCNPVSL(V)	Deamidation Q (3), Deamidation Q (4), Carbamidomethyl C (5)	7192	16	b4*b6b6*b7b8b8*b9b9°b10*y2y4y5y6y7*y7°y10	18.2875
											1156.5	0.4175	6.4632	(L)GTLPTMCNVF(V)	Oxidation M (6), Carbamidomethyl C (7), Deamidation N (8)	7984	10	b6b8b8°b9b9°y1y7y7*y8y10*	10.3547
											1425.62	2.1751	6.4417	(L)QQQMNPCKNYL(L)	Deamidation N (5), Carbamidomethyl C (7), Deamidation N (9)	31498	10	b1b2b2*b5*b10y1y5y6y7y9*	25.5027
											1898.93	-0.4932	6.3803	(M)RQQCCQQLAQIPQQL(Q)	Carbamidomethyl C (4), Carbamidomethyl C (5)	1102.91	6	b2*b4*b10b11y4y15	25.3437
											1059.52	5.0072	6.3555	(L)LQQCNPVSL(V)	Deamidation Q (2), Carbamidomethyl C (4)	2227	10	b2b4b5b7b7*b8*b9y1y2y8°	15.5609
											1171.62	1.1711	6.3123	(Y)LLQQCNPVSL(V)	Carbamidomethyl C (5)	11904	11	b2b4b5b6b7b9*b10°y1y2°y7*y8	24.325
											1551.77	-0.0014	6.3104	(L)VSMILPRSDCKVM(R)	Oxidation M (3), Carbamidomethyl C (10)	24962	8	b3°b4b5b10b12y9y9°y10	16.8325
											1155.51	-3.0415	6.2697	(L)GTLPTMCNVF(V)	Oxidation M (6), Carbamidomethyl C (7)	21593	7	b7b9b9°b10y1y5y7	10.5252
											946.429	-1.0541	6.2694	(L)QQCNPVSL(V)	Carbamidomethyl C (3), Deamidation N (4)	515	7	b4*b6*b7*y4y4°y7°y8*	19.4082
											1139.53	2.7426	6.2052	(L)GTLPTMCNVF(V)	Carbamidomethyl C (7)	6683	11	b6b7b7°b8°b9b9°b10°y7y7*y8y9	17.5809
											1899.91	-4.831	6.1546	(M)RQQCCQQLAQIPQQL(Q)	Deamidation Q (2), Carbamidomethyl C (4), Carbamidomethyl C (5)	3121.61	5	b3*b11y4*y11y15	17.4595
											1535.77	-1.4449	6.0932	(L)VSMILPRSDCKVM(R)	Carbamidomethyl C (10)	1517	6	b12y1y2y6°y8y9	19.6228
											945.45	4.5327	5.933	(L)QQCNPVSL(V)	Carbamidomethyl C (3)	860	8	b4*b5*b6*b7*y1y3°y4y4°	15.8431
											1058.53	1.9561	5.722	(L)LQQCNPVSL(V)	Carbamidomethyl C (4)	337	8	b3b3*b4*b7*y1y4y5*y8*	32.0227
											557.289	-6.7091	0	(F)ASIVAD(I)		6653	3	y3y3°y4°	1.9681
											912.484	6.4635	0	(F)ASIVADIGGQ(-)		461	0		0
											489.231	2.3807	0	(A)DIGGQ(-)		3668	3	b2b3°b5°	11.1199
											374.205	3.9551	0	(D)IGGQ(-)		2253	2	b2b3	22.9818
											928.418	-1.465	0	(L)QQCNPVSL(V)	Carbamidomethyl C (3)	3126	0		0
1669	P04726	Alpha/beta-gliadin clone PW1215 OS=Triticum aestivum OX=4565 PE=3 SV=1	33.92	8.5225	365.42	17	16.8919	7.7313	257	16.4608	1494.65	2.5058	6.5895	(F)QQPQQQYPSGQGF(F)	Deamidation Q (4), Deamidation Q (5)	125164	39	b1b3b3*b4b4*b5b5*b6b6*b7b10b10*b11b11*b11°b12b12°y1y2y3y3*y4y4*y5y5*y5°y6y6*y6°y7y7*y7°y8y8*y8°y9y10y11°y13*	20.0729
	P04722	Alpha/beta-gliadin A-II OS=Triticum aestivum OX=4565 PE=2 SV=1	33.639	6.8247	198.358	24	20.6186	9.7229	391	17.0396	1495.64	6.2466	6.5821	(F)QQPQQQYPSGQGF(F)	Deamidation Q (1), Deamidation Q (4), Deamidation Q (5)	124372	30	b2b3b3*b4b5*b6b6*b7b9b9°b10°b12b13y1y2y3y3*y4y4*y5y5*y5°y6y6*y6°y7y7°y8*y11y11°	13.2597
	A0A1D5VV61	Fructose-bisphosphate aldolase OS=Triticum aestivum OX=4565 PE=3 SV=1	38.772	6.9961	117.434	4	16.4804	12.7367	98	19.2792	608.302	-2.8708	6.4747	(F)GIFGTN(-)		12013	14	b2b3b4b5b5°y1y2y2°y3y3°y4y4*y4°y6	13.5806
	W4ZLX9	Uncharacterized protein OS=Triticum aestivum OX=4565 PE=4 SV=1	50.251	6.1553	115.222	2	2.439	14.7407	31	19.9915	1380.67	1.0442	6.4639	(L)ALQTLPAMCNVY(I)	Carbamidomethyl C (9)	43942	20	b2b3b4b4°b5b5°b7°b8°b10b10°b11b11°y1y2y4y4*y5y7y7*y8	12.6429
											1493.67	4.2327	6.3645	(F)QQPQQQYPSGQGF(F)	Deamidation Q (5)	56017	29	b2*b3b3*b4b4*b5b6b6*b7b8b11b12y1y2y4*y5*y5°y6y6*y6°y7y7°y8y8*y9y10y10°y12*y13	16.3188
											779.359	2.2421	6.2751	(L)VQEQQF(Q)	Deamidation Q (5)	51462	16	b2b2*b3b3*b3°b4b4*b5b5*b5°y1y2y3y5y5°y6	6.1533
											1381.65	0.535	6.2483	(L)ALQTLPAMCNVY(I)	Deamidation Q (3), Carbamidomethyl C (9)	37977	18	b2b3b4b5b5°b7°b9*b10b11b11°y1y2y5y7y7*y8y8*y12	18.8771
											1396.66	1.0618	6.1556	(L)ALQTLPAMCNVY(I)	Oxidation M (8), Carbamidomethyl C (9)	41193	23	b2b3b4b4°b5b5°b7*b7°b8°b9b9*b10b10*b11°y1y2y3*y4y5*y7y7*y9*y9°	14.4058
											894.361	1.9927	6.0788	(L)CCQQLW(Q)	Carbamidomethyl C (1), Carbamidomethyl C (2)	11225	10	b1b2b3b3*b4b4*b5b5*y2y6	6.2604
											778.373	-0.0661	5.97	(L)VQEQQF(Q)		25103	18	b2*b3b3*b3°b4b4*b4°b5b5°b6b6*y1y2y2*y3y3*y6y6*	13.7461
											1397.65	2.8616	5.9691	(L)ALQTLPAMCNVY(I)	Deamidation Q (3), Oxidation M (8), Carbamidomethyl C (9)	23483	13	b2b3b4b4°b5b5°b7b11°y1y2y7y7*y8	15.5099
											1469.78	4.3118	5.8436	(L)QQQLIPCRDVVL(Q)	Deamidation Q (1), Carbamidomethyl C (7)	19019	11	b2b3b3*b4b4*b9°b10°y5y7y8y9	12.6913
											1492.69	4.1835	5.7996	(F)QQPQQQYPSGQGF(F)		13687	14	b3b4b4*b6b7b8b11*y1y4*y6y6°y7y7°y8	11.0564
											1493.67	5.1609	5.7049	(F)QQPQQQYPSGQGF(F)	Deamidation Q (1)	1560	20	b1b2*b3*b4*b5b6*b7b9*y3y3*y4y4*y6*y6°y7y8y8*y8°y11y12*	17.4341
											1468.8	0.7354	5.698	(L)QQQLIPCRDVVL(Q)	Carbamidomethyl C (7)	11507	12	b3*b4b4*b5b9b11*y5y6y7y8y10*y11*	19.3361
											1495.62	-9.1557	5.6929	(F)QQPQQQYPSGQGF(F)	Deamidation Q (1), Deamidation Q (5), Deamidation Q (11)	2056	16	b1b3b3*b4b4*b6*b11*y1y3y4y6y6°y8y9y12°y13*	15.0607
											1397.65	2.1069	5.5393	(L)ALQTLPAMCNVY(I)	Oxidation M (8), Carbamidomethyl C (9), Deamidation N (10)	17198	11	b2b3b4b4°b8b10b10°y1y7y7*y8	12.593
											1639.76	3.8984	5.4985	(F)QQPQQQYPSGQGFF(Q)		3150	12	b7b8b9b10b11*b12*y1y3y6y6°y7y9°	24.464
											1866.9	-5.6327	5.4664	(L)ALQTLPAMCNVYIPPY(C)	Oxidation M (8), Carbamidomethyl C (9)	1257	9	b3b4b4°b5b5°b8b10y3y14°	8.0503
											971.537	2.9807	5.3561	(L)IPCRDVVL(Q)	Carbamidomethyl C (3)	15802	3	b4b5y7	18.9761
											1641.72	1.4137	5.1953	(F)QQPQQQYPSGQGFF(Q)	Deamidation Q (6), Deamidation Q (11)	1013	6	b4*b7*y3y5y7y9*	22.5401
											613.297	5.3381	0	(L)VQEQQ(F)		1189	7	y1*y2*y3y3°y4y4*y4°	19.0598
											871.33	-3.4313	0	(L)PAMCNVY(I)	Oxidation M (3), Carbamidomethyl C (4), Deamidation N (5)	1306	4	b3b5b5*y2	10.1847
											485.235	-1.3632	0	(L)VQEQ(Q)		530	1	y1	36.5807
1803	P21292	Gamma-gliadin OS=Triticum aestivum OX=4565 PE=3 SV=1	34.278	7.5146	680.237	30	32.1192	3.6733	392	15.5251	1868.86	0.7494	6.9348	(F)CQQPQRTIPQPHQTF(H)	Carbamidomethyl C (1), Deamidation Q (2), Deamidation Q (3), Deamidation Q (5)	43547	25	b2*b3b6b8b8°b9b10b12b13b14b15b15°y2y3y3°y4y4*y4°y5y5°y6y6°y7y7*y12	17.0906
	M9TE79	Gamma-gliadin 3 OS=Triticum aestivum OX=4565 PE=2 SV=1	34.381	7.5146	327.708	21	28.8079	3.575	282	16.3057	915.456	2.8016	6.8599	(Y)ANIDAGIGGQ(-)		87253	38	b2b2*b3*b4*b4°b5*b5°b6b6*b6°b7b7*b7°b8b8*b8°b9b9*b9°b10b10*b10°y1y1*y2y2*y3y3*y4y4*y5y5*y6y6*y7y7°y8y10	9.2455
											1423.65	1.6957	6.8478	(F)LQQQMNPCKNF(L)	Oxidation M (5), Carbamidomethyl C (8)	14817	24	b2b2*b3b3*b4b5b6b6*b7b8b9b9*y2y2*y3y4y5y5*y7y8y8*y9y9*y11	12.1821
											1454.74	2.5574	6.8194	(L)VLKTLPTMCNVY(V)	Oxidation M (8), Carbamidomethyl C (9)	17071	17	b2b3b4b4°b5b5°b8b9b10b11y2y3y4y5y7y10y12	16.7294
											916.44	3.5401	6.811	(Y)ANIDAGIGGQ(-)	Deamidation Q (10)	50209	30	b2b2*b3b4b4*b4°b5*b5°b6b6*b6°b7b7*b7°b8b8*b8°b9b9*b9°b10b10°y1y3y4y5y6y7y8y10	11.2611
											1193.66	2.4092	6.7976	(L)GIIQPQQPAQL(E)	Deamidation Q (7)	26175	18	b2b3b4b7b9b10b10*b11y1y2*y3y3*y4y5y7y8y8*y9	11.31
											776.433	4.4174	6.7381	(L)FQLAQGL(G)		25402	20	b2b2*b3b3*b4b4*b5b5*b6b7b7*y1y2y3y3*y4y4*y5y5*y7	14.9346
											917.423	2.478	6.4865	(Y)ANIDAGIGGQ(-)	Deamidation N (2), Deamidation Q (10)	6130	21	b2b4°b6b6°b7b7°b8b8°b9b10*y3y3*y4y5y5*y6y6*y7y7°y8y10	15.843
											674.385	2.233	6.4865	(L)EGIRSL(V)		47292	8	b3b4b4°y1y2y3y4y5	12.5911
											1533.78	2.4347	6.4829	(L)VSIILPRSDCQVM(Q)	Carbamidomethyl C (10), Oxidation M (13)	5653	18	b2°b3b3°b4b4°b5b5°b9b11b12y1y2y4y8y8°y9y10y13	13.1957
											1407.65	-0.8137	6.443	(F)LQQQMNPCKNF(L)	Carbamidomethyl C (8)	16243	15	b2*b4b5*b6b8y2y4*y5y6*y8y8*y9y9*y10y11	16.396
											1192.68	9.8207	6.373	(L)GIIQPQQPAQL(E)		13621	16	b2b4b7b9b10y1y2y2*y3*y4y4*y5y5*y7y7*y8	16.1303
											1361.64	3.2086	6.2818	(Y)VPPDCSTINVPY(A)	Carbamidomethyl C (5)	45316	17	b2b6b7b7°b8b8°b9b9*b9°b10b10*b10°b12°y1y2y3y5	16.6882
											1867.88	2.8865	6.2515	(F)CQQPQRTIPQPHQTF(H)	Carbamidomethyl C (1), Deamidation Q (2), Deamidation Q (3)	21651	8	b8b10b12y4y5y6*y7y12	10.2597
											1242.59	1.0154	6.162	(L)KTLPTMCNVY(V)	Oxidation M (6), Carbamidomethyl C (7)	15685	12	b2b3b3°b5°b6°b7b8b9b9°b10°y4*y7	24.9597
											1868.86	-2.3895	6.1319	(F)CQQPQRTIPQPHQTF(H)	Carbamidomethyl C (1), Deamidation Q (2), Deamidation Q (3), Deamidation Q (10)	22113	15	b2*b3b7b7*b8y3*y3°y4y4°y5y5°y7y7°y8*y15*	19.475
											1455.72	1.3411	6.1034	(L)VLKTLPTMCNVY(V)	Oxidation M (8), Carbamidomethyl C (9), Deamidation N (10)	6087	10	b3b4b4°b5b5°b10y2y5y7y10	18.2886
											1534.77	3.0706	6.0455	(L)VSIILPRSDCQVM(Q)	Carbamidomethyl C (10), Deamidation Q (11), Oxidation M (13)	2468	9	b3b3°b4b11b12y1y8y9y13	15.2377
											1866.9	2.1318	6.0222	(F)CQQPQRTIPQPHQTF(H)	Carbamidomethyl C (1), Deamidation Q (2)	7655	11	b2b3b3*b8b10y3°y5y6°y7y7*y8	18.6113
											1409.63	8.1755	5.9858	(F)LQQQMNPCKNF(L)	Deamidation Q (2), Deamidation Q (3), Carbamidomethyl C (8)	10237	7	b4b6b10y1y5*y7y10	14.2554
											916.438	0.6536	5.9583	(Y)ANIDAGIGGQ(-)	Deamidation N (2)	7746	16	b2b4°b5b6b6°b7b7°b8b8°b9y1*y3y3*y4y4*y7*	17.6651
											1409.62	0.7358	5.9339	(F)LQQQMNPCKNF(L)	Deamidation N (6), Carbamidomethyl C (8), Deamidation N (10)	3258	10	b2b3*b5b5*b7b9y1y4y5y6	19.6116
											1226.6	3.636	5.911	(L)KTLPTMCNVY(V)	Carbamidomethyl C (7)	6541	7	b3b5b5°b6b7b9y1	8.3869
											629.361	-0.3836	5.2953	(F)QLAQGL(G)		1930	6	b3b3*y3y3*y4*y6	22.2891
											1408.64	1.787	5.2026	(F)LQQQMNPCKNF(L)	Deamidation Q (4), Carbamidomethyl C (8)	4690	9	b2b3b9*y2y3y3*y4*y6y9*	19.0493
											438.249	7.0332	0	(L)EGIR(S)		4545	1	y3	18.1225
											545.342	3.2668	0	(E)GIRSL(V)		2364	1	b2	7.609
											488.322	5.2383	0	(G)IRSL(V)		1056	1	b1	38.6548
											1083.52	4.6384	0	(Y)VPPDCSTINV(P)	Carbamidomethyl C (5)	4470	2	y8*y8°	0
											412.256	0.5921	0	(L)GIIQ(P)		825	0		0
1896	A1EHE7	Gamma-gliadin OS=Triticum aestivum OX=4565 PE=2 SV=1	33.567	7.5425	1346.85	14	24.7458	3.7574	181	16.0337	874.462	-0.7964	7.4088	(F)SSVVAGIGGQ(-)		55174	28	b3b3°b4b4°b5b5°b6b6°b7b7°b8b8°b9b9°b10b10°y1y1*y2y2*y3y3*y4y5y6y7y8y8*	8.603
	P08453	Gamma-gliadin OS=Triticum aestivum OX=4565 PE=3 SV=1	37.098	7.5952	457.487	10	8.5627	8.664	74	19.3495	875.447	0.4249	7.3077	(F)SSVVAGIGGQ(-)	Deamidation Q (10)	29522	25	b2°b3b3°b4b4°b5b5°b6b6°b7b7°b8b8°b9b9°b10b10°y1y3y4y5y6y7y8y10	11.7836
	M9TGF7	Gamma-gliadin 2 OS=Triticum aestivum OX=4565 PE=2 SV=1	37.134	8.105	440.071	5	8.5627	1.6501	54	15.9949	688.399	-0.2393	6.9636	(L)EAIRSL(V)		20590	16	b1b2b2°b3b3°b4b4°b5b5°b6y2y2°y3y4y5y6	13.9763
	A0A1D6REQ9	Uncharacterized protein OS=Triticum aestivum OX=4565 PE=4 SV=1	13.73	5.7949	440.071	5	22.7642	1.8052	47	16.1406	1357.72	2.1811	6.9376	(Y)VPPECSIIKAPF(S)	Carbamidomethyl C (5)	115800	23	b2b3b4b6b6°b7b7°b8b9b9°b10°y1y2y3y4y5y6y7y8y9y9°y10°y12	11.9161
	M9TK56	Gamma-gliadin 5 OS=Triticum aestivum OX=4565 PE=2 SV=1	41.17	8.1094	395.159	5	6.9444	1.475	69	18.3408	1454.7	1.2204	6.8702	(L)VLQTLPTMCNVY(V)	Oxidation M (8), Carbamidomethyl C (9)	12328	19	b2b3b4b4*b4°b5b5*b5°b8*y2y3y4y5y6y7y7*y9y10*y12	20.0728
											1438.71	0.4457	6.7765	(L)VLQTLPTMCNVY(V)	Carbamidomethyl C (9)	9501	19	b2b3b4b4°b5b5°b8°b9b9°b10*b10°b11*y1y2y4y5y7y7*y9*	23.0585
											1605.86	1.1719	6.479	(L)VQGQGIIQPQQPAQL(E)	Deamidation Q (10)	4427	10	b1b6*b7*b8b11y2y2*y4y7y8*	12.4068
											798.437	1.5946	6.2926	(L)AQIPQQL(Q)	Deamidation Q (5)	4862	7	b6y2y4y4*y5y6*y7	12.4362
											797.454	2.5671	6.167	(L)AQIPQQL(Q)		4019	8	b4*b5*b6y4y4*y5y7y7*	12.4741
											2838.44	4.4295	6.0026	(L)YQQQQVGQGTLVQGQGIIQPQQPAQL(E)	Deamidation Q (2), Deamidation Q (3), Deamidation Q (4)	1069	13	b11°b12°b14b17°b18b19y1y2*y3y6y9y12y14	23.3802
											1604.88	2.394	5.6955	(L)VQGQGIIQPQQPAQL(E)		1986	6	b3*b7b11y3*y4y6*	29.587
											2213.19	11.704	5.2854	(Y)VPPECSIIKAPFSSVVAGIGGQ(-)	Carbamidomethyl C (5)	1639	5	b5°b14y5y6y22	9.4234
											502.262	0.5597	0	(V)AGIGGQ(-)		852	1	b4	1.0947
											614.353	4.1453	0	(F)SSVVAGI(G)		617	1	y6°	0
1961	A1EHE7	Gamma-gliadin OS=Triticum aestivum OX=4565 PE=2 SV=1	33.567	7.5425	6572.12	48	46.1017	4.8199	697	15.6786	1357.72	4.6096	8.5553	(Y)VPPECSIIKAPF(S)	Carbamidomethyl C (5)	1128688	32	b2b3b4b5b5°b6b6°b7b7°b8b8°b9b9°b10b10°b11b12y1y2y3y4y5y6y7y8y8°y9y9°y10y10°y11y11°	13.4474
	M9TGF7	Gamma-gliadin 2 OS=Triticum aestivum OX=4565 PE=2 SV=1	37.134	8.105	2817.52	13	15.2905	2.9987	155	14.7117	874.465	2.0351	8.4699	(F)SSVVAGIGGQ(-)		688473	30	b2b2°b3b3°b4b4°b5b5°b6b6°b7b7°b8b8°b9b9°b10b10°y1y1*y2y2*y3y3*y4y5y6y7y8y9*	6.6411
	A0A1D6REQ9	Uncharacterized protein OS=Triticum aestivum OX=4565 PE=4 SV=1	13.73	5.7949	2801.59	12	32.5203	2.8139	142	12.8729	875.453	7.4539	8.2686	(F)SSVVAGIGGQ(-)	Deamidation Q (10)	403560	27	b2b2°b3b3°b4b4°b5b5°b6b6°b7b7°b8b8°b9b9°b10b10°y1y2y3y4y5y6y7y8y9	2.7457
	Q94G92	Gamma-gliadin OS=Triticum aestivum OX=4565 PE=2 SV=1	33.871	8.3086	2202.07	12	15.7718	2.829	165	15.42	1438.71	5.1722	8.1165	(L)VLQTLPTMCNVY(V)	Carbamidomethyl C (9)	156952	30	b2b3b4b4°b5b5°b6b7b7°b8°b9b9°b10b10°b11y1y2y3*y4y4*y5y6°y7y7*y7°y9y9°y10y10°y12	12.103
	M9TG60	Gamma-gliadin 1 OS=Triticum aestivum OX=4565 PE=2 SV=1	38.837	7.8589	2154.87	7	6.4897	2.908	86	14.1713	2213.17	4.8479	8.0995	(Y)VPPECSIIKAPFSSVVAGIGGQ(-)	Carbamidomethyl C (5)	68639	46	b2b4b5b6b6°b7b8b10b10°b11b12b13b13°b14b15b15°b16b17b17°b18b19b20b21b22y1y1*y2y3y3*y4y4*y5y5*y6y7y8y9y10y10*y12°y13y14y14*y15y20y21	15.0154
	B6UKP0	Gamma-gliadin OS=Triticum aestivum OX=4565 GN=ll927 PE=2 SV=1	34.542	8.0303	2154.87	7	7.2848	2.908	86	14.1713	1604.88	0.1399	8.0649	(L)VQGQGIIQPQQPAQL(E)		33275.7	22	b2b2*b3*b4b6b6*b7b7*b8b8*b11b13y2y2*y3y4y4*y5y7y8y9y15	11.6988
	M9TK56	Gamma-gliadin 5 OS=Triticum aestivum OX=4565 PE=2 SV=1	41.17	8.1094	638.903	11	6.9444	3.4709	200	13.0176	1454.7	0.2468	7.9761	(L)VLQTLPTMCNVY(V)	Oxidation M (8), Carbamidomethyl C (9)	133139	27	b2b3b4b4°b5b5°b6°b7°b8°b10b10°b11b11°y1y2y3*y4y4*y5y6y6°y7y7°y8y8*y12y12*	15.2672
											900.555	3.7619	7.9524	(L)EAIRSLVL(Q)		115843	18	b2b2°b3b3°b4b4°b5b5°b6b6°b7b7°b8y1y5y6y7y8	8.5819
											1605.86	2.3863	7.9418	(L)VQGQGIIQPQQPAQL(E)	Deamidation Q (11)	60650.8	19	b2b2*b4b5b5*b6b6*b7b8b8*b10b11b13y3y4y4*y5y7y15	16.6302
											688.4	2.2551	7.9073	(L)EAIRSL(V)		292507	18	b1°b2b2°b3b3°b4b4°b5b5°b6b6°y1y2y2°y3y3°y4y5	5.9251
											1186.65	2.1052	7.8711	(F)LLQQCKPVSL(V)	Deamidation Q (3), Carbamidomethyl C (5)	40368.1	20	b1b2b3b4*b5b6b8b9b10*y1y2y2°y3y4y4°y5y7y8y9y10	19.41
											798.436	0.6474	7.8461	(L)AQIPQQL(Q)	Deamidation Q (6)	88650.4	14	b2b2*b3b4b4*b5b5*b6b7b7*y3y3*y4y5	15.6754
											1439.7	3.6741	7.7516	(L)VLQTLPTMCNVY(V)	Deamidation Q (3), Carbamidomethyl C (9)	66884.5	21	b2b3b4b4°b5b5°b6*b7b7°b8°b10b10°b11b11°y1y2y3y6y7y7*y10	16.8529
											1439.7	2.872	7.7235	(L)VLQTLPTMCNVY(V)	Carbamidomethyl C (9), Deamidation N (10)	58666.1	21	b2b3b4b4°b5b5°b7b7°b8b10b11°y1y2y4y5y5*y7y7*y9y11*y12*	15.5528
											1185.67	2.4436	7.5689	(F)LLQQCKPVSL(V)	Carbamidomethyl C (5)	48709.2	21	b2b3b4b4*b5b5*b6b6*y1y2y4y4°y5y5°y6y6°y7y7°y8*y8°y10	14.4786
											1455.69	4.9337	7.5403	(L)VLQTLPTMCNVY(V)	Oxidation M (8), Carbamidomethyl C (9), Deamidation N (10)	44440.4	14	b2b3b4b4°b5b5°b6°b10b10°b11y2y5y7y9	7.4125
											1455.69	2.9593	7.4406	(L)VLQTLPTMCNVY(V)	Deamidation Q (3), Oxidation M (8), Carbamidomethyl C (9)	60592	10	b2b4b4°b5b5°b11y3*y5y7y7*	5.7605
											2214.16	3.5729	7.3796	(Y)VPPECSIIKAPFSSVVAGIGGQ(-)	Carbamidomethyl C (5), Deamidation Q (22)	32045	21	b2b7b8b9b12b14b15b17b17°b18b19b21b22y1y3y5y6y7y13y13*y14	14.4809
											2837.43	-5.5814	7.3362	(L)YQQQQVGQGTLVQGQGIIQPQQPAQL(E)	Deamidation Q (8), Deamidation Q (22)	65972	29	b2b3b3*b6b9b10*b10°b11°b13*b18°b19*b22°b25°y1y4y4*y5y6*y7y8y13y18*y19y20*y21y22y23y24y26*	15.3368
											1249.62	0.2853	7.3186	(L)YQQQQVGQGTL(V)		6967	14	b2b2*b3b5b6b7b9y2y2°y3°y5y5*y7*y10	23.5981
											1606.85	3.8384	7.3047	(L)VQGQGIIQPQQPAQL(E)	Deamidation Q (8), Deamidation Q (11)	41267.7	10	b8y2*y3y3*y4y5y7y7*y8y10	14.152
											1242.56	4.8121	7.287	(L)QTLPTMCNVY(V)	Oxidation M (6), Carbamidomethyl C (7)	14586.7	16	b2b2°b3b3*b3°b5b5°b6b7*b9b9*b9°b10y1y5y7	13.333
											1531.8	3.2098	7.269	(L)QQCKPVSLVSSLW(S)	Carbamidomethyl C (3)	21229.3	17	b2b3b3*b4b4*b5b6*b7b7°b10y1y3y4y7y8y9y13	19.5556
											1607.83	3.2469	7.1943	(L)VQGQGIIQPQQPAQL(E)	Deamidation Q (2), Deamidation Q (8), Deamidation Q (14)	30716.4	9	b4b8b14y2y3*y4y5y7y11	12.4364
											1606.85	2.7225	7.1461	(L)VQGQGIIQPQQPAQL(E)	Deamidation Q (4), Deamidation Q (14)	43648.5	6	b7*b8y4y7y12y15	10.6832
											2581.25	0.1161	7.0601	(L)QTLPTMCNVYVPPECSIIKAPF(S)	Oxidation M (6), Carbamidomethyl C (7), Carbamidomethyl C (15)	2802	12	b3*b9*b10*b11*y2y3y4y8y8°y10y11y12	22.3676
											2793.39	-3.2985	7.0563	(L)VLQTLPTMCNVYVPPECSIIKAPF(S)	Oxidation M (8), Carbamidomethyl C (9), Carbamidomethyl C (17)	8356	16	b2b3b4b4°b5b5*b6b10b11b12y3y4y11y12y13y20°	18.5119
											1186.65	2.1268	7.0151	(F)LLQQCKPVSL(V)	Deamidation Q (4), Carbamidomethyl C (5)	28082.3	12	b2b3b10*y1y2y2°y4y5y7y7*y8°y9*	14.8517
											2674.36	-5.7953	6.9128	(Y)QQQQVGQGTLVQGQGIIQPQQPAQL(E)	Deamidation Q (2), Deamidation Q (14)	3057	13	b2b2*b4b5b12b16b17b18y2*y5*y7y9y24	14.62
											2836.45	-1.6156	6.9084	(L)YQQQQVGQGTLVQGQGIIQPQQPAQL(E)	Deamidation Q (19)	18408	13	b3b4b5b8b11*b18b21*y1y5y6*y7y15y18	24.3345
											1226.56	2.8368	6.8769	(L)QTLPTMCNVY(V)	Carbamidomethyl C (7)	3904.75	11	b2*b4*b5*b8*b10*y4y5y7y9y9°y10*	16.002
											1250.6	3.0299	6.8483	(L)YQQQQVGQGTL(V)	Deamidation Q (2)	10864	9	b4b5b6b8*y2y8*y9*y10*y11*	15.7679
											2674.38	0.7018	6.7753	(Y)QQQQVGQGTLVQGQGIIQPQQPAQL(E)	Deamidation Q (1), Deamidation Q (14)	7796	12	b2*b3*b8b14b17*b18°b25y9y11y12y18°y20	25.813
											1605.87	4.5138	6.7533	(L)VQGQGIIQPQQPAQL(E)	Deamidation Q (4)	23973.1	6	b8b8*b11*b13y4*y7	15.7357
											2582.24	2.2816	6.751	(L)QTLPTMCNVYVPPECSIIKAPF(S)	Deamidation Q (1), Oxidation M (6), Carbamidomethyl C (7), Carbamidomethyl C (15)	994	6	b3*b5b9°b10°b11°y13	18.7616
											2674.37	-1.9164	6.6485	(Y)QQQQVGQGTLVQGQGIIQPQQPAQL(E)	Deamidation Q (14), Deamidation Q (20)	3784	9	b3b3*b6*b9b10*b15*y2y7y16	21.2524
											2673.39	-3.27	6.5271	(Y)QQQQVGQGTLVQGQGIIQPQQPAQL(E)	Deamidation Q (20)	1254	8	b2b3b7*b11*b12°y7y15y15*	23.8879
											2675.36	-0.4842	6.4708	(Y)QQQQVGQGTLVQGQGIIQPQQPAQL(E)	Deamidation Q (7), Deamidation Q (12), Deamidation Q (18)	2800	8	b3b5*b10b14*b17°y2y9y14	20.1621
											2275.24	-0.239	6.4281	(L)VQGQGIIQPQQPAQLEAIRSL(V)	Deamidation Q (8)	3412	7	b8b15b17*y2y7y11y20°	19.1505
											1086.56	6.4793	6.4275	(Y)QQQQVGQGTL(V)		2196	11	b4b4*b9b10b10°y2y3y4*y5y7y7°	26.2893
											2274.25	-2.2162	6.3987	(L)VQGQGIIQPQQPAQLEAIRSL(V)		2519	4	b1b6*b8y15*	14.6495
											2583.04	-23.654	6.2856	(W)SMIWPQSDCQVMRQQCCQQL(A)	Carbamidomethyl C (9), Carbamidomethyl C (16), Carbamidomethyl C (17)	2866	7	b1°b13*b17*y6*y13°y17*y20*	0
											4033.06	-6.5395	6.2034	(L)AQIPQQLQCAAIHTVIHSIIMQQEQQQGMHILLPL(Y)	Carbamidomethyl C (9), Deamidation Q (27), Oxidation M (29)	3058	12	b2*b5*b8b15°y9y9*y12°y13*y14*y15y16°y25*	16.8675
											575.356	1.07	0	(I)IKAPF(S)		2545	3	b1b2b3	4.5485
											373.208	-1.3425	0	(F)SSVV(A)		2274	2	y2y3	19.2029
											373.208	-0.5085	0	(F)SSVV(A)		802	0		0
											502.264	4.5925	0	(V)AGIGGQ(-)		9427	3	b2b3b5	6.9234
											1953.05	-0.1791	0	(Y)VPPECSIIKAPFSSVVAGI(G)	Carbamidomethyl C (5)	412	1	y12°	0
2078	Q94G92	Gamma-gliadin OS=Triticum aestivum OX=4565 PE=2 SV=1	33.871	8.3086	489.889	4	15.7718	20.4708	30	20.5739	1218.6	1.5333	6.5875	(M)ILPRSDCQVM(R)	Carbamidomethyl C (7)	18002	11	b2b4b5b6b7b8b8*b9y1y8y8*	10.9283
	B6UKP0	Gamma-gliadin OS=Triticum aestivum OX=4565 GN=ll927 PE=2 SV=1	34.542	8.0303	469.998	2	3.3113	1.1039	20	14.0805	1219.58	-0.293	5.7044	(M)ILPRSDCQVM(R)	Carbamidomethyl C (7), Deamidation Q (8)	6802	9	b2b7b7°b8b9y1y2y8y8*	17.1642
	A0A1D5S346	Uncharacterized protein OS=Triticum aestivum OX=4565 PE=4 SV=1	18.944	8.0947	469.998	2	5.9524	1.1039	20	14.0805	1579.75	-38.4219	5.1602	(L)QCAAIHSIVHSIIM(Q)	Carbamidomethyl C (2)	5076	4	b5b10b10°y5°	27.3618
											2780.28	-14.0545	4.5824	(F)SQQPQQTFPQPQQTFPHQPQQQF(S)		1127	6	b7*b17y3*y10*y10°y14°	30.9265
2161	Q94G92	Gamma-gliadin OS=Triticum aestivum OX=4565 PE=2 SV=1	33.871	8.3086	843.059	6	8.7248	12.41	44	20.1351	1218.6	1.0611	7.074	(M)ILPRSDCQVM(R)	Carbamidomethyl C (7)	69276	13	b2b4b6b7b8*b9y1y2y3y7y7*y8y8*	8.5566
	B6UKP0	Gamma-gliadin OS=Triticum aestivum OX=4565 GN=ll927 PE=2 SV=1	34.542	8.0303	837.236	4	6.6225	1.772	54	19.0909	1219.59	3.2296	6.6693	(M)ILPRSDCQVM(R)	Carbamidomethyl C (7), Deamidation Q (8)	28671	13	b2b4b5b6b8*b8°b9y1y2y3y5°y8y8°	24.6936
	A0A1D5S346	Uncharacterized protein OS=Triticum aestivum OX=4565 PE=4 SV=1	18.944	8.0947	837.236	3	5.9524	1.9986	37	19.4203	1234.59	0.6533	6.2015	(M)ILPRSDCQVM(R)	Carbamidomethyl C (7), Oxidation M (10)	18148	11	b2b3b4b6b7b8y1y2y3y3*y8*	21.4807
											1200.55	10.17	5.5744	(L)QTLATMCNVY(V)	Carbamidomethyl C (7)	8238	3	b6°y6°y8°	0
											716.45	28.3677	5.387	(L)EVIRSL(V)		1148	4	y3y3°y4y5	22.8079
											1069.55	1.9756	0	(M)ILPRSDCQV(M)	Carbamidomethyl C (7)	594	0		0
2335	A0A1D5SNK9	Uncharacterized protein OS=Triticum aestivum OX=4565 PE=4 SV=1	26.296	9.1919	150.71	6	13.4694	2.9667	92	13.5101	1106.61	3.4341	6.2742	(L)TLEEKKVPY(Q)		0	17	b2b2°b3b3°b4b4°b6b6°b7b7°y2y3y4y5y6y7y7°	7.8913
	A0A1D6RH21	Uncharacterized protein OS=Triticum aestivum OX=4565 PE=4 SV=1	33.725	9.3809	150.71	11	23.3974	2.8668	166	15.4831	791.469	4.0475	5.9786	(L)SLAPKLY(H)		0	11	b1b3b4b5b5°b6b7y2y3y4y5	15.8102
	W4ZXK1	Uncharacterized protein OS=Triticum aestivum OX=4565 PE=4 SV=1	33.682	9.0498	150.71	15	23.4727	3.2132	171	15.3766	1220.6	2.4475	5.9406	(L)IDVSNKPDWF(L)		0	18	b1b2b3b4°b9b10°y1y2y4y5y6y6°y7y7*y8y9y9°y10	18.2122
	W5AC28	Uncharacterized protein OS=Triticum aestivum OX=4565 PE=4 SV=1	33.537	9.2197	150.71	10	20.2572	2.8966	148	15.1176	1356.79	4.2556	5.9215	(F)LKINPEGKVPVY(N)		0	11	b2b3b4b6b8b9b9°y3y4y8y10	12.5548
	A0A1D5SNK7	Uncharacterized protein OS=Triticum aestivum OX=4565 PE=4 SV=1	34.153	9.2197	150.71	10	19.8738	2.8966	148	15.1176	701.348	-3.7377	5.8888	(F)STFVTF(L)		0	14	b2b2°b3b3°b4b4°b5b5°b6y1y3y3°y4y6	10.8558
											1219.7	2.146	5.7277	(L)LTLEEKKVPY(Q)		0	12	b2b2°b3°b4b5°b7b8b8°y2y3y4y9	15.0671
											680.411	3.5744	5.7083	(Y)HLQVAL(E)		0	9	b1b2b3b4b5b6b6*y2y6	11.0609
											1558.89	-0.3776	5.5872	(F)VKTKATKENLIAGW(A)		0	12	b2b3b4b5b8b10b11y1y2y3y10y14	18.075
											1243.7	0.3683	5.4766	(L)KINPEGKVPVY(N)		0	9	b3b3*b7b8b8°y3y4y8y11	20.3714
											1094.57	2.7135	5.3326	(Y)HLQVALEHF(K)	Deamidation Q (3)	0	11	b2b3b4b5b6b7b7°y3y3°y7°y9	24.2458
											715.446	-0.0742	5.3128	(F)SQRVLL(T)		0	11	b2b2*b3b3*b4b4*b5b6y1y4y6*	12.8991
2386	A0A1D5ZTV0	Serpin-N3.2 OS=Triticum aestivum OX=4565 PE=3 SV=1	40.336	4.9922	283.728	3	9.0909	2.9484	31	18.6284	1486.8	0.8742	6.1812	(F)VLADASNIGGPRVAF(A)		0	14	b2b3b8y2y3y5y6y7y8y9y10y12y13y15	13.0393
	H9AXB3	Serpin-N3.2 OS=Triticum aestivum OX=4565 PE=2 SV=1	42.969	5.0112	283.728	3	8.5427	2.9484	31	18.6284	1948.98	3.4842	5.2623	(F)RLASAISSNPESTVNNAAF(S)		0	4	b5°b9y5y10	17.3348
	P93692	Serpin-Z2B OS=Triticum aestivum OX=4565 PE=1 SV=1	42.954	5.0112	283.728	3	8.5427	2.9484	31	18.6284	1487.79	3.6298	5.2263	(F)VLADASNIGGPRVAF(A)	Deamidation N (7)	0	13	b2b4°b8°b9°b10b11°b13y8y9y10y14*y15y15*	23.4933
	A0A1D5ZTU9	Serpin-N3.2 OS=Triticum aestivum OX=4565 PE=3 SV=1	35.993	6.8745	283.728	3	10.4294	2.9484	31	18.6284
2645	A0A1D6DC72	Uncharacterized protein OS=Triticum aestivum OX=4565 PE=4 SV=1	22.535	6.5771	179.315	5	13.3005	2.2192	57	17.5703	759.438	-2.2934	5.7636	(W)IVAIGTW(V)		15313	13	b2b3b4b5b6b6°b7°y1y2°y3y3°y4y4°	8.264
	A0A1D5WUW6	Uncharacterized protein OS=Triticum aestivum OX=4565 PE=4 SV=1	13.957	4.7974	150.278	2	17.5573	9.8368	17	18.5563	1301.62	-2.9745	5.5382	(L)RSQVVQHSSCL(V)	Deamidation Q (6), Carbamidomethyl C (10)	4180	18	b1b2°b3b3*b3°b4b4*b5b5*b6b6*b7y2y5y5°y6°y8y11	22.1216
	A0A1D6CKP0	Uncharacterized protein OS=Triticum aestivum OX=4565 PE=4 SV=1	78.495	7.6714	112.306	2	4.1847	23.2946	22	19.479	1300.64	-1.8894	5.3505	(L)RSQVVQHSSCL(V)	Carbamidomethyl C (10)	4196	12	b3b3*b4b5b6b6*b7b8°y2y5y5°y11	15.4324
											1413.73	1.9669	4.9052	(F)LRSQVVQHSSCL(V)	Carbamidomethyl C (11)	2469	10	b4b5*b6b7b9*y2y5y6°y9*y12	15.8028
											958.479	1.7541	4.5923	(L)NPCRDALL(H)	Carbamidomethyl C (3)	3996	4	b5*b5°b6y6	25.2254
2719	A0A1D5S0Z9	Uncharacterized protein OS=Triticum aestivum OX=4565 PE=4 SV=1	63.827	6.6753	1557.4	27	26.455	4.4919	437	16.8859	1399.71	1.3077	7.3206	(W)VQVVNDHGRNVY(N)		0	38	b2b2*b3b3*b4b5*b6b6°b7b7*b9*b10b10*b12b12*y1y2y3y4y4*y5y5*y6y7y7*y7°y8y8*y8°y9y9*y9°y10y10*y10°y11y11*y11°	9.9611
	A0A1D5S0Z8	Uncharacterized protein OS=Triticum aestivum OX=4565 PE=4 SV=1	59.459	6.9287	1557.4	26	28.463	4.5486	432	16.5523	1089.6	0.7178	7.1914	(Y)GISRTEARSL(K)		0	24	b2b3b4b4°b5b5°b6b6°b7b7°b8b9b10y1y2y2°y3y4y4°y5y5°y6y6°y8	15.3456
	W5AKY9	Uncharacterized protein OS=Triticum aestivum OX=4565 PE=4 SV=1	64.885	6.4438	1245.87	25	18.1976	3.4462	329	17.419	1464.7	0.0791	7.1472	(L)SVNIDDPSRADIY(N)		0	27	b2b3b3*b4b4*b4°b5*b6b7°b9*b10b11°y1y2y4°y5y6y7y7°y8y8°y9y9°y10y11y11*y13	15.312
	A0A1D5T267	Uncharacterized protein OS=Triticum aestivum OX=4565 PE=4 SV=1	58.529	7.9336	1245.87	20	20.2312	3.5419	316	16.9858	1202.64	-1.4112	7.0777	(L)GALPVDVIANAY(G)		0	28	b2b3b4b5b6b6°b7b7°b8b9b10b10*b11b11*b11°b12b12*y1y2y3y3*y4y4*y5y6y9y10y12*	21.211
	A0A1D5T266	Uncharacterized protein OS=Triticum aestivum OX=4565 PE=4 SV=1	62.246	6.5186	1141.69	18	17.7215	3.5932	288	17.392	1400.69	1.0695	7.0207	(W)VQVVNDHGRNVY(N)	Deamidation Q (2)	0	24	b2b3b3*b4b7b7*b8*b10b11b12y4y4*y5y5*y6y6*y7y7*y8y9y9*y10y10*y11	14.3102
	W5AC38	Uncharacterized protein OS=Triticum aestivum OX=4565 PE=4 SV=1	29.613	6.0513	842.63	17	29.1045	3.6327	256	17.1688	856.479	1.6476	6.9645	(Y)QNAIISPL(W)	Deamidation N (2)	0	12	b2b3b4b5b5*b6b6*b6°b8y3y4y8	14.1742
											1098.64	3.0974	6.9248	(Y)NPRAGTITRL(N)		0	32	b2b2*b3b3*b4b4*b5b5*b6b6*b6°b7b7*b7°b8b8*b8°b9b9*b10b10*y2y3y3°y4y5°y6y6°y7y7°y9y10*	10.2378
											1024.55	0.2498	6.9011	(F)APKFSQSIF(H)		0	21	b2b3b4b5b5°b6b6*b7b7°b8b8°b9y1y2y3y5°y6*y6°y7y8y9	19.4298
											860.486	-2.3822	6.8874	(L)LIIPQNY(V)		0	19	b2b3b4b6b6*b7b7*y1y2y2*y3y3*y4y4*y5y5*y6*y7y7*	12.533
											855.494	0.2207	6.8634	(Y)QNAIISPL(W)		0	14	b2b2*b3b3*b4b4*b5b5*b6b6*b6°b8y3y8	12.4827
											747.406	3.5805	6.8602	(L)IIPQNY(V)		0	9	b2b4y2y2*y3*y4y4*y5y6	10.9158
											1465.69	4.5735	6.7905	(L)SVNIDDPSRADIY(N)	Deamidation N (3)	0	12	b2b2°b3b4b9b11y2y4y7y8y9y11	17.1661
											900.442	2.4829	6.7849	(Y)MIQGHIW(V)	Oxidation M (1)	0	7	b3b4b5b6y3y4y5	13.4097
											1340.69	3.1658	6.6355	(L)KFSREEELGVF(A)		0	15	b1b4b5b6b7b7°b8b9b10y1y2y9y9°y10y11	8.5859
											884.445	0.2045	6.5624	(Y)MIQGHIW(V)		0	7	b2b3*b5b6y3y4y5	22.685
											946.521	10.8184	6.5585	(M)SATRVHLY(Q)		0	16	b2b3b4b4°b5b5°b6b6°b7b8b8°y2y3y5y6y8	14.1405
											898.503	4.3028	6.5369	(Y)NGLLSPGQL(L)		0	18	b4b5b5*b5°b8b8*b8°b9b9*y2y2*y4y4*y5y5*y5°y6y9	15.2159
											899.484	0.4416	6.4954	(Y)NGLLSPGQL(L)	Deamidation Q (8)	0	12	b5b5*b5°b8b8*b8°b9y4y5y5°y6y9	21.2121
											1025.53	0.6435	6.4847	(F)APKFSQSIF(H)	Deamidation Q (6)	0	19	b2b3b4b5b5°b6b7b7°b8b8°y1y2y3y5y5*y5°y6*y7y9*	19.0862
											1064.49	2.7633	6.435	(W)NINAHSVMY(M)	Oxidation M (8)	0	18	b1b3b3*b5*b6b6°b7b7*b7°b8b9b9*y2y4y7y7°y8*y9*	26.7284
											1550.8	3.6467	6.2203	(M)KKAQHDGSKYIEF(K)		0	14	b5b5*b8b10b10°b11b12b12°b13y2°y3y8y8°y12°	17.6813
											1203.63	3.5119	6.1313	(L)GALPVDVIANAY(G)	Deamidation N (10)	0	8	b6b7b8b9b10b11y1y9	14.6135
											885.428	3.8096	6.1095	(W)NINAHSVM(Y)		0	10	b2*b4b5b5*b6b6*b7y3y4°y7*	23.3052
											1048.49	2.9331	6.0399	(W)NINAHSVMY(M)		0	10	b5b5*b6b6*b7b7°b8y5y5°y9*	20.0678
											1041.58	4.4481	5.9649	(Y)QNAIISPLW(N)		0	8	b4*b5*b6*b8*y3y4y5y9*	19.4023
											1111.65	0.7507	5.6218	(M)VSHIAGKSSIL(G)		0	4	b7°b10y1y7°	7.8466
											1172.58	-2.5161	0	(Q)VVNDHGRNVY(N)		583	5	b2b4b5b5°b7	35.3419
3358	A0A1D6RZ71	Uncharacterized protein OS=Triticum aestivum OX=4565 PE=4 SV=1	17.136	5.4053	307.107	3	29.6774	8.7961	23	25.1207	1739.9	8.4013	5.9888	(M)EVPPEWPAGRVREAF(I)		243880	16	b1b3b6b7b8b9b9°b10b15y3y4y10y12y12°y13y13°	24.3656
											735.294	-5.4749	5.0136	(W)SFGDYF(R)		2433	3	b5°y3y4	24.5328
											2593.27	-11.4699	4.7617	(Y)ISASSCLEPLAPFSSSDPLRVGVGF(F)	Carbamidomethyl C (6)	955	4	b1b3°b8b10°	28.3266
3866	I0IT62	Alpha/beta-gliadin OS=Triticum aestivum OX=4565 PE=4 SV=1	38.373	8.0024	316.055	22	43.8066	2.9979	402	17.8269	1895.93	2.842	6.6611	(Y)IPPYCSTTIAPSGIFGTN(-)	Carbamidomethyl C (5)	131109	39	b2b3b4b5b7b7°b8b8°b9b9°b10b10°b12b13b14b14°b15b15°b16b18y1y2y2°y3y3°y4y4°y6°y7y7*y8y8°y9y9°y11°y12y12*y14°y17*	11.0768
	W5FPA9	Uncharacterized protein OS=Triticum aestivum OX=4565 PE=4 SV=1	18.037	6.2432	264.775	1	6.4516	6.7206	28	14.6174	1439.68	0.0694	6.563	(L)ARQTLPAMCNVY(I)	Oxidation M (8), Carbamidomethyl C (9)	74454	24	b3b3*b4b4*b4°b5b5°b6b6*b7*b8°b10*y1y2y3y4y5y6y6*y7y7*y8y10y12	14.0043
	A0A1D5RRQ5	Uncharacterized protein OS=Triticum aestivum OX=4565 PE=3 SV=1	56.448	8.9209	200.941	2	1.5595	0.9178	30	15.7083	1424.67	2.1795	6.4889	(L)ARQTLPAMCNVY(I)	Deamidation Q (3), Carbamidomethyl C (9)	9968	19	b1b3b4b4°b5b5*b6b7b8b8°b9b11y1y2y3y4y7y8y8*	19.0117
											1423.68	1.856	6.3154	(L)ARQTLPAMCNVY(I)	Carbamidomethyl C (9)	26548	19	b2b3b4b4*b4°b5b5°b6b7b8b8*b9y1y2y4*y5y7y7*y12	14.9332
											1440.66	-0.8616	6.1763	(L)ARQTLPAMCNVY(I)	Deamidation Q (3), Oxidation M (8), Carbamidomethyl C (9)	36879	16	b3*b4b4*b5b5°b6b7b8b8*b9y1y2y4*y5y7y7*	14.4521
											4667.2	-1.731	6.0372	(Y)QQPQQQYPSGQGSFQPSQQNPQAQASVQPQQLPQFEEIRNL(A)	Deamidation Q (4), Deamidation Q (5), Deamidation Q (28)	3096	23	b3b3*b4b5b7b13°y2y3y4y5y6y7y8y9y9°y10y10°y11y12y13y13*y14y17°	10.5883
											922.401	-1.7332	5.9061	(L)CCQRLW(Q)	Carbamidomethyl C (1), Carbamidomethyl C (2)	31820	14	b1b2b3b3*b4b4*b5b5*y2y3y4*y5y5*y6*	14.8036
											1424.67	2.3417	5.8248	(L)ARQTLPAMCNVY(I)	Carbamidomethyl C (9), Deamidation N (10)	9316	12	b3b4b4*b5b5*b7b8b10y1y2y7y7*	23.2322
											1440.66	1.0937	5.7945	(L)ARQTLPAMCNVY(I)	Oxidation M (8), Carbamidomethyl C (9), Deamidation N (10)	28360	11	b3b4b4*b5b5*b5°b7b8y2y7y7*	17.6599
											1896.91	1.668	5.7139	(Y)IPPYCSTTIAPSGIFGTN(-)	Carbamidomethyl C (5), Deamidation N (18)	4246	11	b1b10b14y2°y3°y4y4°y8y8°y9°y14	10.9525
											971.536	2.18	5.6981	(L)IPCRDVVL(Q)	Carbamidomethyl C (3)	12475	6	b1b2b5b6y6y7	29.3629
											1623.81	3.1687	5.675	(Y)IPPYCSTTIAPSGIF(G)	Carbamidomethyl C (5)	44151	12	b6b7b7°b8b8°b10°b14y1y2y4y5y6	13.2764
											1441.65	0.5831	5.6162	(L)ARQTLPAMCNVY(I)	Deamidation Q (3), Oxidation M (8), Carbamidomethyl C (9), Deamidation N (10)	11535	11	b4b4°b5b5*b6b10b11y2y4y7*y10°	21.5108
											1597.84	3.8476	5.6032	(L)QQQQLIPCRDVVL(Q)	Deamidation Q (1), Carbamidomethyl C (8)	3211	10	b2b3b3*b4b10*y1y7y9y10y11	20.5623
											1433.71	-2.4829	5.5383	(L)QQHNIAHASSQVL(Q)	Deamidation Q (1)	4993	12	b3b5b5*b6b8b9°b10°b11b11°b12b13y2	16.1461
											2026.97	3.7914	5.5176	(L)QQHNIAHASSQVLQQSSY(Q)	Deamidation Q (11)	9633	20	b1b2*b5*b6*b7*b8*b9*b11b12b12°b13b14b14*b16b16°b18y2°y5y5*y9	25.0147
											2028.91	-5.2985	5.4823	(L)QQHNIAHASSQVLQQSSY(Q)	Deamidation Q (1), Deamidation Q (2), Deamidation N (4)	990	18	b2b3b5*b8y2y3°y4y4°y5y5*y6y7y7°y8y9°y11y12y15	21.4687
											1596.86	1.4519	5.4793	(L)QQQQLIPCRDVVL(Q)	Carbamidomethyl C (8)	2677	7	b3*b4*b5*y6°y7y8y9°	18.3235
											2025.98	3.5957	5.4483	(L)QQHNIAHASSQVLQQSSY(Q)		8646	20	b2b2*b3*b4*b5*b6*b8b8*b9°b11*b12b12*b13b13*b14y2y2°y4y5y18*	15.4667
											4313.09	-2.8976	5.4454	(L)VQQLQYPGQQQPFPPQQPYPQPQPFPSQQPLPQPQPF(L)	Deamidation Q (2), Deamidation Q (3), Deamidation Q (29)	4485	7	b5*b6*b7b11y13y14y22*	17.7434
											3012.52	-4.706	5.3507	(L)QQQQLIPCRDVVLQQHNIAHASSQVL(Q)	Carbamidomethyl C (8), Deamidation Q (15), Deamidation Q (24)	1456	14	b1b2b2*b3b3*b4*b5*b6b6*b7*b10°b11*y7°y10*	12.5004
											1432.73	0.6018	5.3376	(L)QQHNIAHASSQVL(Q)		7501	15	b3b4*b5*b6*b7*b8*b9*b10b11*b11°b13y2y4*y10y11	17.7946
4045	P10388	Glutenin_ high molecular weight subunit DX5 OS=Triticum aestivum OX=4565 GN=GLU-1D-1D PE=3 SV=5	90.238	6.4849	78.7823	8	3.4198	2.5005	120	16.6386	1514.72	0.7798	6.1884	(Y)SSYHVSVEHQAASL(K)		0	30	b2b4b4°b5b5°b6b6°b7b7°b8b9b9°b10b11b11°b12b13b13°b14y2°y3°y5y6y6°y7y9y9°y10y11y12	13.1602
	P08489	Glutenin_ high molecular weight subunit PW212 OS=Triticum aestivum OX=4565 PE=3 SV=1	89.119	5.7773	78.7823	4	3.4606	2.0139	104	16.0742	1177.6	0.815	5.6747	(Y)HVSVEHQAASL(K)		0	20	b1b2b3b3°b4b4°b5b5°b7b8b9b9°y1y2y2°y6y6*y6°y9*y11	11.3997
											1515.71	-0.2767	5.6457	(Y)SSYHVSVEHQAASL(K)	Deamidation Q (10)	0	19	b2°b4b5b6b6°b7b7°b8b9b9°b10b11b12b13b13°y6y9y9°y10	17.1378
											1637.78	1.743	5.2514	(W)LQPGQGQQGYYPTSL(Q)	Deamidation Q (2)	0	7	b8b10b11b13y2y4y5	17.5434
											1383.63	3.1065	0	(Y)SSYHVSVEHQAAS(L)		1067	2	y6*y9*	0
											1384.61	-1.4357	0	(Y)SSYHVSVEHQAAS(L)	Deamidation Q (10)	349	2	b10y7°	24.73
											959.471	1.5127	0	(Y)HVSVEHQAA(S)		746	4	b9y5°y7°y8°	16.0372
											1296.6	3.4736	0	(Y)SSYHVSVEHQAA(S)		604	1	y8°	0
4126	A0A1D6REQ9	Uncharacterized protein OS=Triticum aestivum OX=4565 PE=4 SV=1	13.73	5.7949	1198.36	2	8.1301	4.7777	47	13.1889	665.4	3.0963	6.7558	(F)VHPSIL(Q)		14861	13	b2b3b4b4°b5b5°y2y3y4y4°y5y5°y6	12.8156
	B2Y2Q6	Low molecular weight glutenin subunit OS=Triticum aestivum OX=4565 GN=GluB3-2 PE=4 SV=1	42.083	8.3086	709.486	19	29.4595	3.8464	167	18.0383	796.386	2.5583	6.6118	(F)GVGTGVGSY(-)		8807	21	b2b3b4b5b5°b6b6°b7b7°b8b8°b9°y2y3y5y5°y6y6°y7y7°y9	15.9297
	A0A0E3Z7G8	Alpha-gliadin (Fragment) OS=Triticum aestivum OX=4565 PE=4 SV=1	32.645	8.0127	358.825	7	10.9155	3.2355	82	17.8949	1071.55	1.9374	6.58	(L)YRTTTSVPF(G)		15357	12	b2b3b3°b4b5°b6b6°b7b7°b9y2y5	23.852
	B2Y2Q1	Low molecular weight glutenin subunit OS=Triticum aestivum OX=4565 GN=GluB3-1 PE=4 SV=1	41.112	8.5093	321.666	7	15.2778	3.4613	52	16.1612	943.521	0.0876	6.5262	(F)SQQQQIVL(Q)		4332	14	b3b3*b3°b4b4*b5b6b6*b6°b7b7*b7°y1y2	14.9098
	P04722	Alpha/beta-gliadin A-II OS=Triticum aestivum OX=4565 PE=2 SV=1	33.639	6.8247	294.77	8	17.1821	16.121	99	20.2504	1955.96	4.3201	6.4405	(L)SHHQQQQPIQQQPQPF(S)		7826	13	b2b3b5b6b7b10b11°b12b14y2y4y7y9	16.4843
	P04730	Gamma-gliadin (Fragment) OS=Triticum aestivum OX=4565 PE=2 SV=1	27.319	8.9019	126.468	8	16.8033	5.2405	50	16.8047	1069.6	0.0822	6.4103	(L)VLPQQQIPF(V)		9654	7	b5b6b6*b7b7*y2y7	11.6761
	A0A1D5S346	Uncharacterized protein OS=Triticum aestivum OX=4565 PE=4 SV=1	18.944	8.0947	117.942	2	5.9524	3.4718	28	21.8222	1956.93	0.9177	6.1593	(L)SHHQQQQPIQQQPQPF(S)	Deamidation Q (12)	23720	12	b3b4b7b7°b9b10b11b14y2y3*y4y11*	16.6891
											908.484	0.2173	6.1343	(Y)RTTTSVPF(G)		4527.57	5	b2°b4b5b5°b6	5.3136
											1956.95	7.2	5.9644	(L)SHHQQQQPIQQQPQPF(S)	Deamidation Q (4)	10870	12	b2b7b11b12b12*b14y1y3y4y6y11y13*	24.6812
											1957.92	2.1757	5.9219	(L)SHHQQQQPIQQQPQPF(S)	Deamidation Q (10), Deamidation Q (11)	21640	15	b1b1°b3°b6°b10°b12*b14y1y2y3*y4y4*y6y8y12	19.6745
											1958.91	7.2298	5.8656	(L)SHHQQQQPIQQQPQPF(S)	Deamidation Q (6), Deamidation Q (10), Deamidation Q (11)	13310	7	b10b12b14b14*y8y9y11	7.9255
											1055.51	-3.0088	5.8411	(L)GQQPQQQQL(A)	Deamidation Q (7)	1719.03	4	b3b6b8*y6	19.0474
											1958.91	4.3757	5.7342	(L)SHHQQQQPIQQQPQPF(S)	Deamidation Q (4), Deamidation Q (10), Deamidation Q (12)	12674	10	b3°b4b9°b12b12°b14y2y7y8y8*	20.1093
											2712.24	-5.5388	5.5152	(F)SQQQQQPLSQQQQPPFSQQQPPF(S)	Deamidation Q (5), Deamidation Q (6), Deamidation Q (19)	1926	6	b4y3y5y7°y10y11	8.0155
											2711.27	0.5631	5.4918	(F)SQQQPPFSQQQQQPLSQQQQPPF(S)	Deamidation Q (2), Deamidation Q (3)	743	6	b8°b10*y3y4y8°y9*	25.3737
											1473.69	6.4884	5.244	(L)QQQCSPVAMPQSL(A)	Carbamidomethyl C (4)	719	6	b7*y2y4*y7*y11y11°	16.8708
											812.428	1.7161	0	(F)SQQQQIV(L)		1483	0		0
											807.474	2.5654	0	(L)VLPQQQI(P)		1961	2	y3*y4*	0
											713.354	-4.6892	0	(F)SQQQQI(V)		1549	2	b4°y5*	0
4162	A0A1D5Y5R3	Uncharacterized protein OS=Triticum aestivum OX=4565 PE=4 SV=1	69.167	6.9917	453.708	18	21.9512	4.5293	192	14.743	1630.85	3.0058	6.8763	(Y)TVREGDVIVAPAGSIM(H)	Oxidation M (16)	0	22	b2b3b4b6b7b8b9b10b12b13b15y1y2y3y4y4°y6y7y7°y8y9y16	11.9201
	W5EST8	Uncharacterized protein OS=Triticum aestivum OX=4565 PE=4 SV=1	70.575	6.7163	453.708	22	21.5311	4.331	199	14.8797	1418.76	2.4845	6.7419	(Y)RVAIMEVNPRAF(V)	Oxidation M (5)	0	18	b1b2b3b4b5b6b7b8b8*b10b12y1y3y4y5y6y7y7°	14.3148
	A0A1D5Y5R2	Uncharacterized protein OS=Triticum aestivum OX=4565 PE=4 SV=1	67.606	6.8071	453.708	18	22.4252	4.5293	192	14.743	1614.86	2.7538	6.7214	(Y)TVREGDVIVAPAGSIM(H)		0	20	b2b3b6b7b7°b8b9b10b12b13y1y2y4y6y6°y7y8y9°y12°y16	15.1926
	A0A1D5Y5R4	Uncharacterized protein OS=Triticum aestivum OX=4565 PE=4 SV=1	62.073	8.1826	434.347	16	22.1416	4.7703	177	14.7349	1262.62	-2.2529	6.4543	(F)VVPGLTDADGVGY(V)		0	15	b2b4b8b9b10b10°b11b11°b12b13y1y2y10y11y11°	8.4884
	A0A1D5X6G4	Uncharacterized protein OS=Triticum aestivum OX=4565 PE=4 SV=1	71.217	8.2075	328.355	15	19.9683	3.0071	160	15.356	709.354	3.6299	6.3311	(Y)LNTQSF(K)		0	20	b2b3b3*b3°b4b4°b5b5°b6b6*b6°y2y2°y3y3°y4y4*y4°y5°y6	13.6087
	A0A1D5X6G5	Uncharacterized protein OS=Triticum aestivum OX=4565 PE=4 SV=1	57.635	9.3105	308.994	14	22.5049	3.084	152	15.5826	1295.66	-0.3796	5.9456	(L)TVIENGEKRSY(T)		0	9	b1b1°b2y1y4y6y7y8y9	9.6063
	W5ECA4	Uncharacterized protein OS=Triticum aestivum OX=4565 PE=4 SV=1	69.407	6.6094	297.029	14	18.6688	4.502	141	15.9518	831.457	-0.6926	5.7995	(F)DEVSRLL(R)		0	5	b2b5y4y5y6	7.9867
	A0A1D5XS09	Uncharacterized protein OS=Triticum aestivum OX=4565 PE=4 SV=1	68.865	7.2466	292.499	14	18.8216	3.0202	140	15.6928	1880.99	2.41	5.7475	(Y)TVREGDVIVAPAGSIMHL(A)	Oxidation M (16)	0	10	b2b6b7b8b8°b9b10y2y6y8	11.9678
	A0A1D5XS10	Uncharacterized protein OS=Triticum aestivum OX=4565 PE=4 SV=1	55.371	9.5347	273.138	11	19.5122	3.1532	105	16.1748	1287.68	-1.575	5.6717	(F)GRPAREVQEVF(R)		0	8	b2b4b7b9*y2y3y9y11	10.1299
	A0A1D5XS07	Uncharacterized protein OS=Triticum aestivum OX=4565 PE=4 SV=1	61.843	6.6973	226.874	10	14.2077	5.2747	94	14.6383	899.559	3.8819	5.6713	(F)SAKPLLASL(S)		0	10	b3°b5b5°b6b7b8y1y2y6y6°	19.8493
	A0A1D5XS08	Uncharacterized protein OS=Triticum aestivum OX=4565 PE=4 SV=1	47.24	9.1904	222.343	8	15.5502	2.5535	70	14.6197	772.419	-0.8364	5.5132	(Y)VAQGEGVL(T)		0	7	b4b6b7b7*b7°y6y8	15.7073
	A0A1D5Y5R1	Uncharacterized protein OS=Triticum aestivum OX=4565 PE=4 SV=1	46.205	11.5459	155.24	10	17.1429	2.6202	95	13.964	1187.63	0.1049	5.4562	(F)RSIIRSDHGF(V)		0	7	b1b3b4b7y1y2y3	10.1871
											1415.7	-0.1172	5.4237	(F)EINAERNERVW(L)		0	16	b3*b3°b5*b5°b6b8b8*b9b9*y1y5y5*y6*y7*y8*y9*	22.9687
											1535.8	1.6364	5.2699	(L)TFGRPAREVQEVF(R)		0	7	b2b5°b10*b11b12y2y4°	18.8292
											809.437	7.5397	5.2232	(Y)VFGPRSF(R)		0	3	b5y5y6	5.0074
											786.351	-14.5907	5.2074	(L)DNPAQEL(T)		0	4	b3*b4*b4°y5	19.2151
											2050.05	2.0754	5.0528	(Y)VAQGEGVLTVIENGEKRSY(T)	Deamidation N (13)	0	7	b2b9°y1y6y7y8y11	16.6524
											1118.6	5.1758	4.9618	(L)RPFDEVSRL(L)		0	4	b4b5b6y9	18.0626
											604.322	3.3615	0	(V)NPRAF(V)		1332	4	b2b2*b3*b4*	21.7477
											1397.68	-5.3642	0	(F)EINAERNERVW(L)		1053	0		0
											1370.72	0.4409	0	(L)TFGRPAREVQEV(F)		322	2	y7*y7°	0
											815.443	-1.7744	0	(Y)RVAIMEV(N)	Oxidation M (5)	617	1	y2°	0
4169	A0A1D6DC72	Uncharacterized protein OS=Triticum aestivum OX=4565 PE=4 SV=1	22.535	6.5771	598.197	10	11.8227	2.1413	109	15.8539	1300.65	3.5104	6.6554	(L)RSQVVQHSSCL(V)	Carbamidomethyl C (10)	11541	23	b1b3b3*b4b4*b5b6b6*b7b7*b8b8°b9°b10b10°b11y1y2y4°y5y6y6*y7	11.046
	A0A1D5RRQ5	Uncharacterized protein OS=Triticum aestivum OX=4565 PE=3 SV=1	56.448	8.9209	185.288	2	1.5595	3.3318	33	12.6044	965.382	0.0383	6.5146	(W)EQCCQQL(K)	Carbamidomethyl C (3), Carbamidomethyl C (4)	12928	15	b2b2°b3°b4°b5b5°b6b6°b7y1y3y3*y4y4*y5	14.2181
											966.364	-1.4318	6.3803	(W)EQCCQQL(K)	Carbamidomethyl C (3), Carbamidomethyl C (4), Deamidation Q (5)	15368	14	b1b2b3*b3°b4b4*b4°b5b5°b6b7b7°y2*y5	9.6641
											1413.73	1.3304	6.242	(F)LRSQVVQHSSCL(V)	Carbamidomethyl C (11)	8598	10	b2b4b5b6b7b8b9y2y5y6°	18.9997
											1381.57	1.7103	6.0575	(L)VMWEQCCQQL(K)	Carbamidomethyl C (6), Carbamidomethyl C (7)	11114	11	b2b3b4b5b6b6*b7b9y1y2y2*	16.7145
											966.365	-0.4329	5.7817	(W)EQCCQQL(K)	Deamidation Q (2), Carbamidomethyl C (3), Carbamidomethyl C (4)	3608	9	b3°b4°b5b6b6*b6°y2*y3y5	14.6427
											1414.71	1.4846	5.5376	(F)LRSQVVQHSSCL(V)	Deamidation Q (4), Carbamidomethyl C (11)	5886	11	b2b3°b5°b7b8b9b12y1y4°y5y12*	22.5934
											1301.63	1.8839	5.4419	(L)RSQVVQHSSCL(V)	Deamidation Q (6), Carbamidomethyl C (10)	8006	8	b1b4b5b6b10y6y10*y11	20.7223
											1647.83	3.9003	5.3179	(M)SFLRSQVVQHSSCL(V)	Carbamidomethyl C (13)	2043	5	b2b8b9y7y8	19.9797
											1169.55	2.373	0	(L)RSQVVQHSSC(L)	Carbamidomethyl C (10)	801	3	b8°y1y2°	14.0434
4171	I6QQ39	Globulin-3A OS=Triticum aestivum OX=4565 GN=Glo-3A PE=2 SV=1	66.284	8.2749	503.326	30	24.8299	4.0914	345	16.0604	1630.85	1.5372	6.9459	(Y)TVREGDVIVAPAGSIM(H)	Oxidation M (16)	0	26	b3b5b6b7b8b9b10b10°b12b13b14b14°b15y1y2y3y3°y4y4°y5y6y7y7°y8y9y16	12.9779
	A0A1D5X6G4	Uncharacterized protein OS=Triticum aestivum OX=4565 PE=4 SV=1	71.217	8.2075	503.326	27	23.1379	4.2972	339	16.1863	1922.05	3.7243	6.7641	(W)LAGRNNVIGKLDNPAQEL(T)		0	35	b2b4b5b6b6*b7b7*b8b9b9*b10b11b12b13b13*b15b15°b16*b17y1y2°y3y3*y3°y5y5*y5°y6y6*y10y10*y11y15°y17y18*	16.4881
	A0A1D5XS09	Uncharacterized protein OS=Triticum aestivum OX=4565 PE=4 SV=1	68.865	7.2466	439.895	19	20.1309	3.7391	233	16.5756	1418.76	1.1524	6.7525	(Y)RVAIMEVNPRAF(V)	Oxidation M (5)	0	18	b1b2b3b4b6b8b10b12y1y2y3y4y5y5*y6y7y7°y12*	13.1077
	A0A1D5X6G5	Uncharacterized protein OS=Triticum aestivum OX=4565 PE=4 SV=1	57.635	9.3105	419.568	22	21.135	3.5866	288	15.4353	709.35	-2.3175	6.7118	(Y)LNTQSF(K)		0	21	b2b2*b3b3°b4b4°b5b5*b5°b6b6*b6°y2y2°y3y3°y4y4°y5y5°y6	11.8752
	W5EST8	Uncharacterized protein OS=Triticum aestivum OX=4565 PE=4 SV=1	70.575	6.7163	368.541	42	20.5742	3.3042	479	16.6858	1880.99	1.5277	6.6984	(Y)TVREGDVIVAPAGSIMHL(A)	Oxidation M (16)	0	26	b1b2b3b3°b4b6b6°b7b8b9b10b12b15b16b17y1y2y3y6y7y8y8°y9y9°y10y12	17.0545
	A0A1D5Y5R3	Uncharacterized protein OS=Triticum aestivum OX=4565 PE=4 SV=1	69.167	6.9917	368.541	32	20.9756	2.8006	469	16.6071	1262.62	-2.8921	6.6915	(F)VVPGLTDADGVGY(V)		0	22	b1b2b8b8°b9b10b10°b11b11°b12b12°b13y1y2y3y4y5y6y7y7°y10y11	21.4832
	A0A1D5XS10	Uncharacterized protein OS=Triticum aestivum OX=4565 PE=4 SV=1	55.371	9.5347	356.136	11	16.0569	4.4839	117	17.2661	1402.77	1.8743	6.5527	(Y)RVAIMEVNPRAF(V)		0	16	b1b2b3b4b5b6b7b8y4y5y5*y7y7°y10y11y12*	9.3104
	A0A1D5XS07	Uncharacterized protein OS=Triticum aestivum OX=4565 PE=4 SV=1	61.843	6.6973	335.774	16	14.3898	3.4064	211	17.6809	710.335	-0.8211	6.5089	(Y)LNTQSF(K)	Deamidation Q (4)	0	18	b2b3b3°b4b4°b5b5*b5°b6b6*y2y2°y3y3°y4y4°y5°y6	15.2171
	A0A1D5Y5R4	Uncharacterized protein OS=Triticum aestivum OX=4565 PE=4 SV=1	62.073	8.1826	326.909	28	21.0526	2.9766	415	16.3469	1535.8	0.7698	6.3763	(L)TFGRPAREVQEVF(R)		0	19	b1b1°b2b3b4b4°b7b8b9b10b11b11*b12b13y1y6y9y10*y11*	15.4763
	A0A1D5XS08	Uncharacterized protein OS=Triticum aestivum OX=4565 PE=4 SV=1	47.24	9.1904	324.442	9	13.1579	4.1044	98	17.8595	2050.05	2.1662	6.3705	(Y)VAQGEGVLTVIENGEKRSY(T)	Deamidation N (13)	0	29	b2b3b4b4*b5*b6*b6°b7b7°b8b10°b19y1y3y4y6y7y7*y7°y8y8°y9y9°y10y11y11°y12y15y17°	15.1718
	A0A1D5Y5R1	Uncharacterized protein OS=Triticum aestivum OX=4565 PE=4 SV=1	46.205	11.5459	213.203	17	14.7619	2.5767	223	14.4751	2049.07	3.7335	6.3499	(Y)VAQGEGVLTVIENGEKRSY(T)		0	16	b2b3b7°y3y4y7y7*y8y10y12y14y15y16y17y17*y18	12.4467
											1614.85	-0.1319	6.3347	(Y)TVREGDVIVAPAGSIM(H)		0	22	b1b2b2°b3b4b5b5°b6b7°y1y2y4y4°y5y6y6°y7y7°y8y9y12°y16	18.6199
											1923.03	-0.4002	6.2194	(W)LAGRNNVIGKLDNPAQEL(T)	Deamidation Q (16)	0	16	b6b7b7*b8b9b10b12b13b17b17*y2°y3°y5y5*y6y10	16.5506
											1296.64	0.4558	6.1447	(L)TVIENGEKRSY(T)	Deamidation N (5)	0	7	b1b2y4y6y7y8y9	12.4751
											831.46	3.3891	6.0999	(F)DEVSRLL(R)		0	8	b2b3b5b6y2y4y5y6	10.525
											1295.65	-3.3859	6.086	(L)TVIENGEKRSY(T)		0	10	b1b1°b2y3y4y6y7y8y8°y9	12.5372
											1287.68	0.8128	6.0493	(F)GRPAREVQEVF(R)		0	10	b2b4b5b6°b7b8b8*b9*y2y9	14.2682
											772.418	-2.7963	6.0092	(Y)VAQGEGVL(T)		0	11	b2b3b4b6°b7b7°b8y3y5y6y8	21.1919
											1536.78	1.1431	5.9211	(L)TFGRPAREVQEVF(R)	Deamidation Q (10)	0	12	b1b1°b2b4b10*b11b11*b12y1y6y9y9*	11.4216
											718.377	5.2276	5.9196	(F)DEVSRL(L)		0	6	b2b3b5y4y5y6	12.8322
											2050.05	3.0556	5.8441	(Y)VAQGEGVLTVIENGEKRSY(T)	Deamidation Q (3)	0	16	b2b5°b7*b9b10°b12*y4y6°y8*y9y10y11*y14y16y17y17*	18.141
											1288.67	0.5892	5.8341	(F)GRPAREVQEVF(R)	Deamidation Q (8)	0	13	b2b4b5b7°b8*b8°y1y3y3°y5y7*y9y11	28.1465
											1403.75	1.6736	5.8171	(Y)RVAIMEVNPRAF(V)	Deamidation N (8)	0	9	b1b3b8b8*b8°b11y4y6y12	16.3575
											2051.04	2.9164	5.7479	(Y)VAQGEGVLTVIENGEKRSY(T)	Deamidation Q (3), Deamidation N (13)	0	11	b2b5b7b10°y7y8y8°y9y9*y10y18	15.4869
											1231.68	-0.0989	5.7417	(L)RPFDEVSRLL(R)		0	6	b4b5b7y6y9y10	17.4544
											899.556	0.14	5.7145	(F)SAKPLLASL(S)		0	12	b2b3°b5°b6b7b7°b8y1y2y3°y6°y7	18.5768
											1809.95	2.8311	5.6814	(L)AGRNNVIGKLDNPAQEL(T)	Deamidation N (12)	0	11	b4b5b5*b6b7y2y5y6y7y12y17	26.4053
											1415.7	1.068	5.6383	(F)EINAERNERVW(L)		0	14	b2°b3°b5°b8b9b9*b11y1y5y6*y7*y8*y9*y10	12.1651
											786.365	2.4378	5.6032	(L)DNPAQEL(T)		0	5	b4b6y3°y5y7	24.435
											1865	2.2787	5.4207	(Y)TVREGDVIVAPAGSIMHL(A)		0	7	b2b6b7b8b9y2y8	11.4056
											1808.96	0.1066	5.3725	(L)AGRNNVIGKLDNPAQEL(T)		0	7	b7b8b9b11y1y2°y5	20.7735
											2016.05	9.6009	4.9465	(F)VVPGLTDADGVGYVAQGEGVL(T)		0	10	b2b9b9°b11b14b15y1y3y7°y8*	20.2454
											700.383	2.4868	0	(Y)RVAIME(V)		757	1	y2°	0
											913.498	6.4722	0	(Y)RVAIMEVN(P)		425	0		0
											929.487	-0.6932	0	(Y)RVAIMEVN(P)	Oxidation M (5)	674	0		0
											1385.74	-0.2706	0	(Y)RVAIMEVNPRAF(V)		840	0		0
											604.321	1.2281	0	(V)NPRAF(V)		1920	5	b2b2*b3*b4b4*	17.1952
											604.324	6.7485	0	(V)NPRAF(V)		1058	0		0
											490.278	1.1107	0	(N)PRAF(V)		632	0		0
											1397.68	-5.8414	0	(F)EINAERNERVW(L)		1340	0		0
											1371.7	-0.98	0	(L)TFGRPAREVQEV(F)	Deamidation Q (10)	813	2	b4y8	27.9045
											587.393	8.6921	0	(E)VSRLL(R)		683	2	b2b3	21.8955
4179	P21292	Gamma-gliadin OS=Triticum aestivum OX=4565 PE=3 SV=1	34.278	7.5146	742.506	33	50	3.9234	360	16.3352	776.43	0.2656	6.9936	(L)FQLAQGL(G)		11074	22	b2b2*b3b3*b4b4*b5b5*b6b6*b7b7*y1y2y3y3*y4y4*y5y5*y7y7*	13.2432
	M9TE79	Gamma-gliadin 3 OS=Triticum aestivum OX=4565 PE=2 SV=1	34.381	7.5146	479.035	26	46.6887	4.0503	268	16.802	916.434	-3.2034	6.8692	(Y)ANIDAGIGGQ(-)	Deamidation Q (10)	26724	31	b2b3b4b4*b5*b5°b6b6*b6°b7b7*b7°b8b8*b8°b9b9*b9°b10b10*y1y2y3y4y5y6y6*y7y7°y8y10	11.4064
											915.449	-4.0241	6.7714	(Y)ANIDAGIGGQ(-)		40798	35	b2b2*b4*b4°b5*b5°b6b6*b6°b7b7*b7°b8b8*b8°b9b9°b10b10*b10°y1y2y3y3*y4y4*y5y5*y6y6*y7y7°y8y9y10	14.3523
											1192.68	5.8958	6.6902	(L)GIIQPQQPAQL(E)		8201	15	b2b3b4b7b7*b10y1y2y2*y4y4*y5y5*y7y8	10.5037
											1193.65	-0.1475	6.6759	(L)GIIQPQQPAQL(E)	Deamidation Q (7)	11303	11	b2b3b7b10y1y2*y3*y4y5y7y8	15.7626
											1407.65	-0.585	6.6109	(F)LQQQMNPCKNF(L)	Carbamidomethyl C (8)	12141	17	b2b2*b5*b6b8b8*b10y2y4y5y5*y8y8*y9y9*y10y11	17.6049
											674.383	-0.3392	6.552	(L)EGIRSL(V)		24358	8	b2b4b4°y1y2y3y4y5	12.0967
											1866.9	2.8769	6.552	(F)CQQPQRTIPQPHQTF(H)	Carbamidomethyl C (1), Deamidation Q (2)	10712	17	b2b3b6b7b7*b8b8°b10b13b15y3*y3°y4y5y5°y7y13*	18.285
											1868.86	1.5366	6.4886	(F)CQQPQRTIPQPHQTF(H)	Carbamidomethyl C (1), Deamidation Q (2), Deamidation Q (3), Deamidation Q (5)	23884	15	b2*b3b7°b8b10b15y3*y3°y4y5y5°y7y7*y8*y12	22.2221
											1454.74	1.6418	6.4774	(L)VLKTLPTMCNVY(V)	Oxidation M (8), Carbamidomethyl C (9)	6846	11	b2b4b5b5°b8°b10y1y2y5y7y10	11.6681
											1868.86	-0.3993	6.3503	(F)CQQPQRTIPQPHQTF(H)	Carbamidomethyl C (1), Deamidation Q (2), Deamidation Q (3), Deamidation Q (10)	16405	16	b2*b7b8b8*b10y1y2y3°y4*y5y5*y5°y7y12y13*y15*	20.4389
											886.536	-0.053	6.3053	(L)EGIRSLVL(K)		16242	13	b1b2b2°b4b4°b5°b6°b7b7°b8y1y7y8	11.5398
											777.413	-2.0871	6.2834	(L)FQLAQGL(G)	Deamidation Q (5)	7919	10	b2*b3b4*b5b6b7y1y4*y5y7	12.2802
											916.437	0.1537	6.2652	(Y)ANIDAGIGGQ(-)	Deamidation N (2)	2746	19	b5°b6b6°b7b8*b8°b9b10y3y3*y4y4*y5y6y7y7°y8*y8°y10	17.3815
											1867.88	2.0458	6.2559	(F)CQQPQRTIPQPHQTF(H)	Carbamidomethyl C (1), Deamidation Q (2), Deamidation Q (3)	19880	11	b2*b3b7b7*b8b9*b10b12b14y5y7°	12.6152
											1533.78	2.195	6.1391	(L)VSIILPRSDCQVM(Q)	Carbamidomethyl C (10), Oxidation M (13)	2973	8	b3b3°b4b11y1y2y8y9	10.0735
											798.437	2.2265	6.1119	(L)AQIPQQL(Q)	Deamidation Q (5)	8482	7	b6y2y3y4y4*y5y7	11.7728
											1423.65	1.6435	6.1042	(F)LQQQMNPCKNF(L)	Oxidation M (5), Carbamidomethyl C (8)	5940	10	b2b2*y1y2y3y5y5*y6y9y11	9.8149
											1242.59	1.9114	6.0775	(L)KTLPTMCNVY(V)	Oxidation M (6), Carbamidomethyl C (7)	8840	7	b2°b3b6b8b9y4y7	23.7769
											797.452	0.8451	6.0754	(L)AQIPQQL(Q)		10264	10	b4*b6y2y2*y3*y4y4*y5y7y7*	13.9316
											1361.64	1.7203	6.0423	(Y)VPPDCSTINVPY(A)	Carbamidomethyl C (5)	20195	8	b2b7b9b10b10°b12°y2y11	14.3279
											2585.22	4.5066	5.9431	(L)KTLPTMCNVYVPPDCSTINVPY(A)	Oxidation M (6), Carbamidomethyl C (7), Carbamidomethyl C (15)	17459	8	b7b11b11°y2y3y11y14y14°	23.6789
											1517.78	0.2315	5.8542	(L)VSIILPRSDCQVM(Q)	Carbamidomethyl C (10)	2729	7	b3b3°b4b4°y2y8y10	23.3205
											1408.64	4.7695	5.6836	(F)LQQQMNPCKNF(L)	Carbamidomethyl C (8), Deamidation N (10)	4073	8	b2*b3b4b6*y5y5*y6y9*	22.3263
											1193.65	0.116	5.5369	(L)GIIQPQQPAQL(E)	Deamidation Q (4)	2817	8	b2b3b7b7*b9y2*y4y6	21.5604
											1633.88	-11.3132	5.4608	(M)QQEQQQGVPILRPL(F)		528	7	b2b2*b4y1y4y6y8	10.3286
											1211.62	1.1779	5.3641	(F)LLQQCNHVSL(V)	Carbamidomethyl C (5)	2394	7	b2y1y2y4y7°y8*y9	26.147
											1226.6	7.3439	5.2695	(L)KTLPTMCNVY(V)	Carbamidomethyl C (7)	3489	3	b3°b8b9	15.4941
											2691.32	11.0881	4.7469	(M)QVDPSGQVQWPQQQPFPQPQQPF(C)		1188	4	b2*y3*y5*y6	23.3064
											438.247	2.1789	0	(L)EGIR(S)		1853	0		0
											545.341	0.5398	0	(E)GIRSL(V)		1003	1	b2	1.4474
											1083.52	4.1447	0	(Y)VPPDCSTINV(P)	Carbamidomethyl C (5)	1838	3	b9*y6°y7°	0
											782.409	5.7217	0	(Q)PQQPAQL(E)	Deamidation Q (3)	660	3	b3b3*b5	19.2053
4220	M9TG60	Gamma-gliadin 1 OS=Triticum aestivum OX=4565 PE=2 SV=1	38.837	7.8589	595.029	25	23.5988	4.5056	375	15.749	1439.64	0.7649	7.1786	(Y)LQQQMNPCKNY(L)	Oxidation M (5), Carbamidomethyl C (8)	44767	31	b2b2*b3b3*b4b5b5*b6b6*b7b7*b8b8*b9y1y2y2*y3y3*y4y4*y5y5*y6y6*y7y8y8*y9*y10*y11	14.0832
											930.499	10.1567	6.8361	(F)ASIVADIGGQ(-)		171153	37	b2b2°b3b3°b4b4°b5b5°b6b6°b7b7°b8b8°b9b9°b10b10°y1y1*y2y2*y3y3*y4y4*y5y5*y5°y6y6°y7y7°y8y8°y9y9°	12.5168
											1440.63	0.7737	6.8177	(Y)LQQQMNPCKNY(L)	Oxidation M (5), Carbamidomethyl C (8), Deamidation N (10)	34596	20	b2b2*b4b4*b5b5*b6b6*b8b9*y3y5y5*y6y7y8y8*y9y9*y11	13.9955
											931.476	3.2485	6.7934	(F)ASIVADIGGQ(-)	Deamidation Q (10)	95273	25	b2°b4b4°b5b5°b6b6°b7b7°b8b8°b9b9°b10b10°y1y3y4y5y5°y6y6°y7y8y10	9.9746
											1440.63	2.5343	6.7914	(Y)LQQQMNPCKNY(L)	Deamidation Q (4), Oxidation M (5), Carbamidomethyl C (8)	48603	26	b2b2*b3b4b4*b5*b6b6*b8b8*b9y1y2y2*y3*y4y4*y5y5*y6y7y7*y8y9y9*y11	17.1466
											1423.65	3.2126	6.7778	(Y)LQQQMNPCKNY(L)	Carbamidomethyl C (8)	25021	26	b2b2*b3b3*b4b4*b5b6b6*b7b7*b8*y2y2*y3y3*y4y5y5*y6y6*y7y8y8*y9*y11	13.224
											1234.63	0.6834	6.6302	(M)ILPRSDCKVM(R)	Carbamidomethyl C (7), Oxidation M (10)	21599	13	b2b4b6b7b8b9b9°y1y2y3y4y6y8	13.1394
											1567.77	2.669	6.5121	(L)VSMILPRSDCKVM(R)	Oxidation M (3), Carbamidomethyl C (10), Oxidation M (13)	20826	14	b2b2°b3b4b5b9b12y1y2y4y8y8°y9y12	8.5424
											1367.67	1.8312	6.4287	(L)VLGTLPTMCNVF(V)	Oxidation M (8), Carbamidomethyl C (9)	16719	14	b2b4b4°b5b5°b8b10b11y1y2y6y7y7*y8	16.78
											1333.65	4.6196	6.4069	(F)VPPECSTTKAPF(A)	Carbamidomethyl C (5)	145143	19	b2b4b6°b7b7°b8°b9b10b10°y1y2y3y4y5y7y8y9y9°y12	16.5698
											1441.62	4.6402	6.3648	(Y)LQQQMNPCKNY(L)	Deamidation Q (2), Deamidation Q (3), Oxidation M (5), Carbamidomethyl C (8)	19636	15	b2b3b4b5b6b8*b9y2y2*y3y4y5y6y7y10*	21.0342
											1218.64	5.4396	6.2884	(M)ILPRSDCKVM(R)	Carbamidomethyl C (7)	20716	10	b2b6b7b8b9b9°y1y2y4y8	10.0293
											1424.63	0.237	6.2698	(Y)LQQQMNPCKNY(L)	Deamidation Q (3), Carbamidomethyl C (8)	23519	13	b4b4*b5*b6b6*b10*y2y3y6y7y8y9y11	19.4864
											1424.63	-1.0941	6.2211	(Y)LQQQMNPCKNY(L)	Carbamidomethyl C (8), Deamidation N (10)	20984	10	b2b3b5b6b7b9*y4y5y5*y8	17.4497
											722.378	4.0797	6.0904	(L)VSSLVSM(I)		8885	15	b2b2°b3b3°b4b4°b5°b6b6°y2y3y4y5°y6°y7	14.1031
											1441.61	2.8635	6.0703	(Y)LQQQMNPCKNY(L)	Deamidation Q (3), Oxidation M (5), Deamidation N (6), Carbamidomethyl C (8)	23341	14	b2b2*b3b4b5b8b9y2y2*y3y6y9y9*y11	9.8721
											1440.63	3.6367	5.9325	(Y)LQQQMNPCKNY(L)	Deamidation Q (3), Oxidation M (5), Carbamidomethyl C (8)	20706	15	b3b4b4*b5b5*b8b9y1y2*y3y4y5y5*y6*y11	19.0106
											1424.63	2.2546	5.8398	(Y)LQQQMNPCKNY(L)	Deamidation Q (2), Carbamidomethyl C (8)	13009	8	b3b4*b8*y2*y5y5*y7y8	17.8145
											1994.07	1.2043	5.7817	(L)FQLVQGQGIIQPQQPAQL(E)	Deamidation Q (13)	1521	7	b6*b11y3*y4y6y7y8	19.917
											1995.06	3.2993	5.542	(L)FQLVQGQGIIQPQQPAQL(E)	Deamidation Q (11), Deamidation Q (14)	1488	8	b6*b7*b9*b11b14y1y5y7	23.8169
											659.338	2.5704	0	(I)VADIGGQ(-)		797	4	b2b4°b5°b6	18.6373
											560.27	4.3691	0	(V)ADIGGQ(-)		2727	2	b4°b5°	0
											489.233	4.4753	0	(A)DIGGQ(-)		1819	7	b2b2°b3°b4b4°b5*b5°	24.2589
											374.206	7.9099	0	(D)IGGQ(-)		1143	1	b4	17.5081
											442.266	0.105	0	(F)ASIVA(D)		1238	0		0
4332	P10388	Glutenin_ high molecular weight subunit DX5 OS=Triticum aestivum OX=4565 GN=GLU-1D-1D PE=3 SV=5	90.238	6.4849	456.598	71	36.9104	6.9318	1034	18.2662	1514.72	0.94	7.3409	(Y)SSYHVSVEHQAASL(K)		276622	47	b2b2°b3°b4b4°b5b5°b6b6°b7b7°b8b8°b9b9°b10b10°b11b11°b12b12°b13b13°b14b14°y1y2y2°y3y3°y4y4°y5y5°y6y7y7*y7°y9y9°y10y10*y10°y11y11°y12y12°	6.6338
	P08489	Glutenin_ high molecular weight subunit PW212 OS=Triticum aestivum OX=4565 PE=3 SV=1	89.119	5.7773	350.765	46	26.253	4.3879	665	17.1175	1875.91	0.9228	7.1386	(L)KRYYPSVTCPQQVSY(Y)	Carbamidomethyl C (9)	250877	47	b1b2b3b4b5b6°b7b8b8°b9b9°b10b10°b11b11*b11°b12b12°b13b13*b13°b14b14°b15°y1y2y2°y3y3°y4y4°y5*y6y6*y6°y7y7°y8y9y10y11y11°y12y12*y13y14*y15*	19.4229
											2050.96	0.19	7.0976	(W)YYPTSPQLSGQGQRPGQW(L)	Deamidation Q (11)	177074	34	b3b4b4°b5b5°b6°b7b8b9*b12b12°b13b13°b14b14°b16°b17b18*y2y3y4*y5y7y8y9y10y11y12y13y14y15y16y16°y17	13.7807
											769.461	0.6447	7.0695	(F)WGIPALL(K)		254857	12	b1b2b3b4b5b6b7y1y2y3y4y5	6.2252
											583.381	-0.2283	7.0085	(W)GIPALL(K)		331987	10	b2b3b4b5b6y1y2y3y4y6	4.1095
											1177.6	2.9272	6.963	(Y)HVSVEHQAASL(K)		326675	33	b1b2b3b3°b4b4°b5b5°b6b6°b7b7°b8b9b10b10°b11b11*b11°y1y2y2°y3y3°y4°y5y6y6*y7y7°y9y9°y10°	8.2182
											2049.98	1.8387	6.9371	(W)YYPTSPQLSGQGQRPGQW(L)		110874	32	b3b5b5°b7b8b11b11*b13b13*b14b15b17*b18y2*y3*y5y6y6*y7y9y9*y10y11y12y13y13°y14y14*y15y15°y16y16°	12.1998
											2051.95	2.7239	6.9045	(W)YYPTSPQLSGQGQRPGQW(L)	Deamidation Q (7), Deamidation Q (17)	113614	34	b2b3b4b5b5°b6°b7b10°b11*b14b18y3y4y5y5*y6y7y8y9y10y10*y11y12y12*y13y13°y14y14°y15y15*y16y16°y17y17*	19.4117
											1515.7	-2.2294	6.9028	(Y)SSYHVSVEHQAASL(K)	Deamidation Q (10)	104884	43	b2b2°b3°b4b4°b5b5°b6b6°b7b7°b8b8°b9b10*b11b11°b12b12*b13b13°b14b14*y1y2y2°y3y4°y5y5°y6y7y7*y8*y9y9°y10y11y11*y11°y12y12°y13	15.4146
											1178.58	-0.8225	6.857	(Y)HVSVEHQAASL(K)	Deamidation Q (7)	128769	28	b1b2b3b3°b4b4°b5b5°b6b6°b7b7°b8b8*b9b9°b10*y1y2y2°y5°y6y6°y7y7°y8y9y9°	9.9559
											2052.93	-0.3913	6.7462	(W)YYPTSPQLSGQGQRPGQW(L)	Deamidation Q (7), Deamidation Q (11), Deamidation Q (17)	34537	26	b2b4b5b5°b9b11b13*b14b14*b17b18b18*y4y5*y7y8y9y10y12°y13y14y14*y14°y16y16°y17	13.581
											1636.79	-3.487	6.7408	(W)LQPGQGQQGYYPTSL(Q)		49756	29	b2b2*b4b5b5*b7b7*b8b8*b9b9*b10b11b12b13°y1y2y2°y3y4y4°y5y5°y7y7°y8y13y14*y15	15.5654
											580.298	0.4591	6.7065	(Y)YPTSL(Q)		22441	11	b2b3b3°b4b4°y1y2y3y4y4°y5	16.8276
											1688.81	-0.3175	6.5767	(L)AAQLPAMCRLEGGDAL(S)	Oxidation M (7), Carbamidomethyl C (8)	50641	22	b2b3b4b4*b7b10b11b13*b15b15*y2y5y5°y6y6°y8y9y11°y12y12°y13y14	19.6445
											1223.53	0.9689	6.5123	(W)QQPGQGQPGYY(L)	Deamidation Q (5)	29963	10	b2b4b5b7b11y1y3y4y9y9*	10.276
											1637.78	0.9329	6.5084	(W)LQPGQGQQGYYPTSL(Q)	Deamidation Q (5)	70324	20	b2*b5b7b7*b8b10b13y1y2y3y4y4°y5y5°y8y8°y10y10*y13y15	14.565
											1428.64	-1.1334	6.2745	(Y)YPSVTCPQQVSY(Y)	Carbamidomethyl C (6)	26585	18	b3°b4b4°b5b6b9b10b10°b12*y1y2y2°y3y4y5*y6y9*y10	10.0584
											1075.52	2.6348	6.1922	(W)LQPGQGQQGY(Y)		12450	14	b2b2*b3*b5b5*b7b7*b8b8*y1y2y3y6*y8	17.5975
											1076.5	0.6868	6.1629	(W)LQPGQGQQGY(Y)	Deamidation Q (2)	17684	7	b2b8b8*b9y3y5*y8	18.2943
											1877.88	2.7839	6.1503	(L)KRYYPSVTCPQQVSY(Y)	Carbamidomethyl C (9), Deamidation Q (11), Deamidation Q (12)	75950	18	b2b3b4b6b6°b7b8b8°b11b12b13b13°b14y1y2y2°y11y14*	14.8892
											1523.7	-8.7564	6.1216	(L)QPGQGQQGYYPTSL(Q)		12760	16	b1b3b6b7b7*b8b9b10b12°b14y2y3y4y4°y5y8*	21.0712
											1540.73	0.0291	6.0907	(L)QLGQGQQGYYPTSL(Q)	Deamidation Q (6)	13621	5	b7b9b10b12y10*	7.5565
											2038.89	4.6335	6.0891	(W)YYPTSPQESGQGQQPGQW(Q)	Deamidation Q (7)	44937	18	b6b13*b14b14*b14°b17b17°b18y3y3*y4y5y9y10y12*y13y14y16	17.7662
											1541.7	-9.5863	6.0168	(L)QLGQGQQGYYPTSL(Q)	Deamidation Q (1), Deamidation Q (4)	1592	22	b2b3*b7*b9*b10b10*b13*b14*y2y2°y3y4y4°y5y5°y7y8y8*y9°y10y10°y11°	21.2506
											1223.53	-0.8589	6.0117	(W)QQPGQGQPGYY(L)	Deamidation Q (1)	5267	14	b3b4b5b5*b6*b7*b10*y1y3y7y7*y9y10*y11*	11.559
											1224.51	-3.9436	5.9834	(W)QQPGQGQPGYY(L)	Deamidation Q (5), Deamidation Q (7)	11246	11	b2b8b9b10b11y1y3y4y5*y6y9	17.9414
											2039.87	3.1018	5.9542	(W)YYPTSPQESGQGQQPGQW(Q)	Deamidation Q (7), Deamidation Q (13)	37323	11	b13°b14°y3y3*y5y7y9y10y11y12°y13	15.6073
											968.472	0.0186	5.9493	(W)YYPTSPQL(S)		7012	7	b6y2*y3y4y4*y6y8	20.8479
											1542.7	1.0071	5.9459	(L)QLGQGQQGYYPTSL(Q)	Deamidation Q (1), Deamidation Q (4), Deamidation Q (6)	2421	16	b1b2b3*b4*b6b6*b9b13*y4y4°y5y8y9y9*y11y13	24.272
											693.383	2.2801	5.9355	(Y)YLTSPL(Q)		8801	7	b2b3b3°b4°b6y3y6	6.4053
											771.461	-0.7129	5.8923	(Y)LTSPLQL(G)		2947	9	b6b6°b7y2y2*y4y4*y5y7	12.4141
											1539.74	-0.4001	5.8598	(L)QLGQGQQGYYPTSL(Q)		8468	5	b3b9b9*b10y14	8.0915
											877.467	-0.8632	5.7997	(L)QQRIFW(G)		8737	8	b3*b4b4*b5b6y1y5y6*	10.2113
											2037.9	2.6943	5.7548	(W)YYPTSPQESGQGQQPGQW(Q)		18314	11	b9b14°y3y3*y4y13y14*y16°y17y17*y18	21.3139
											3439.64	-3.3359	5.7098	(L)KACQQVMDQQLRDISPECHPVVVSPVAGQY(E)	Carbamidomethyl C (3), Carbamidomethyl C (18)	17506	17	b5b11*b11°b14b15°b18b19b22b24b26b29y1y2*y3*y5*y17°y30*	20.1166
											1689.79	0.6701	5.7005	(L)AAQLPAMCRLEGGDAL(S)	Deamidation Q (3), Oxidation M (7), Carbamidomethyl C (8)	18407	14	b2b3b4b6b9*b14y1y2y5°y6y8°y13y14*y16	24.3626
											2597.32	-0.4301	5.6841	(Y)EQQIVVPPKGGSFYPGETTPPQQL(Q)		10968	12	b3°b4°b5°b6b19b22y4y5y9*y19y22y24*	24.5082
											1528.74	0.4536	5.6822	(Y)YPTSPQQPGQGQQL(G)		1670	8	b3°b7*b9y6y7y10y12°y13*	31.3347
											1222.55	2.2355	5.6806	(W)QQPGQGQPGYY(L)		2420	7	b6b6*b7*b9*b10*y8*y9	23.2736
											1653.82	-2.1172	5.6506	(Y)LTSPQQSGQGQQPGQL(Q)		2085	5	b6b12b14°y4y14°	15.9074
											2416.11	8.8874	5.638	(Y)YPGQASPQRPGQGQQPGQGQQGY(Y)	Deamidation Q (8), Deamidation Q (18)	17230	17	b5b9b11*b15b18b18*b19b20b23y3*y9y9*y12y14y15*y17y22*	27.6589
											2415.12	3.6918	5.6278	(Y)YPGQASPQRPGQGQQPGQGQQGY(Y)	Deamidation Q (12)	14667	10	b5*b6*b9b11*b14b15b18b21y1y2	23.3509
											2587.21	1.3339	5.6186	(W)LQPGQGQQGYYPTSPQQPGQGQQL(G)	Deamidation Q (7), Deamidation Q (22)	2900	16	b3b5*b6*b10*b14b15*y2y3y4y6y7y7*y9*y12y13y14°	18.4859
											1843.79	3.4637	5.6111	(L)QQTGQGQQSGQGQQGYY(S)	Deamidation Q (1)	11788	13	b6°b7°b8b9b10*b12b12°b13°b14b14*b15y4y10°	15.5303
											1101.51	4.0409	5.5399	(L)SGQGQRPGQW(L)	Deamidation Q (5)	2707	9	b1b2b3*b4b4°b6°y5*y6y9	20.0524
											2181.89	-3.4429	5.5278	(L)QQTGQGQQSGQGQQGYYSSY(H)	Deamidation Q (1), Deamidation Q (13)	4119	8	b12b16*b18y4y6y13y15y16	25.0674
											1859.89	1.2475	5.5026	(L)QCERELQELQEREL(K)	Carbamidomethyl C (2)	13607	9	b4*b4°b6*b7*b7°b10y4y5y12*	28.1166
											1288.6	1.4806	5.4844	(Y)YPTSPQQPGQW(Q)		3296	3	b3b7b9*	16.1248
											2414.14	5.5221	5.4596	(Y)YPGQASPQRPGQGQQPGQGQQGY(Y)		4781	4	b13b13*b15y13	21.4767
											2417.09	4.0385	5.4494	(Y)YPGQASPQRPGQGQQPGQGQQGY(Y)	Deamidation Q (8), Deamidation Q (15), Deamidation Q (18)	14290	7	b5b7*b15b19b20*y7y12	19.8235
											1530.71	0.6195	5.4486	(Y)YPTSPQQPGQGQQL(G)	Deamidation Q (10), Deamidation Q (12)	1990	10	b3°b4°b7°b8*b9b10y3y6y10y11°	23.7566
											1844.77	2.7228	5.4472	(L)QQTGQGQQSGQGQQGYY(S)	Deamidation Q (7), Deamidation Q (8)	578	11	b5*b9°b11b15*y2y6*y9°y10y12y14y15	16.8474
											1845.76	1.9215	5.4356	(L)QQTGQGQQSGQGQQGYY(S)	Deamidation Q (1), Deamidation Q (5), Deamidation Q (14)	15636	7	b9b13°b14*y3y10°y12*y14	17.7551
											2181.91	8.3178	5.3968	(L)QQTGQGQQSGQGQQGYYSSY(H)	Deamidation Q (1), Deamidation Q (5)	4795	16	b3°b4b4*b9b12°b14*b15y3y4y4°y5°y6°y8°y9y10y13	21.56
											4273.93	-6.6973	5.3711	(L)KRYYPSVTCPQQVSYYPGQASPQRPGQGQQPGQGQQGY(Y)	Carbamidomethyl C (9), Deamidation Q (11), Deamidation Q (19), Deamidation Q (23)	2136	13	b3b6°b9b12*b12°b15°b19b29°y5*y14*y18°y22*y24*	27.3568
											3440.63	-3.1495	5.362	(L)KACQQVMDQQLRDISPECHPVVVSPVAGQY(E)	Carbamidomethyl C (3), Deamidation Q (4), Carbamidomethyl C (18)	9341	5	b5*b9b16°b19b21	23.6199
											1950.87	5.7272	5.3401	(L)TVAEGEASEQLQCEREL(Q)	Deamidation Q (10), Deamidation Q (12), Carbamidomethyl C (13)	1650	11	b2°b3°b10°b13*b16*b17°y4y6y7y11°y17*	18.2867
											1213.61	1.2969	5.3389	(L)SGQGQRPGQWL(Q)		8072	10	b2b2°b3b5b5°b6y1y3*y6*y11	21.3648
											1844.77	-0.313	5.314	(L)QQTGQGQQSGQGQQGYY(S)	Deamidation Q (1), Deamidation Q (7)	20754	7	b3b7b12°b14*b15*y9y12*	21.5212
											979.454	6.2525	5.2861	(L)QLGQGQQGY(Y)	Deamidation Q (4)	1263	9	b2b5b6*b7b8b8*b9y1y9	14.1441
											2180.93	9.6983	5.2829	(L)QQTGQGQQSGQGQQGYYSSY(H)	Deamidation Q (1)	575	6	b16y4y4°y5°y11°y18°	9.5764
											2182.86	-9.5741	5.2778	(L)QQTGQGQQSGQGQQGYYSSY(H)	Deamidation Q (1), Deamidation Q (2), Deamidation Q (7)	3522	12	b5°b6b7*b9b14b17*y4y10y14*y15*y17*y20	22.0068
											1100.52	0.9513	5.2126	(L)SGQGQRPGQW(L)		2511	12	b2°b3b6b7b7*b8°y1y2y6y6*y8y8*	30.8361
											638.366	0.3805	0	(F)WGIPAL(L)		2305	1	y5	38.8506
											452.288	3.3421	0	(W)GIPAL(L)		2060	2	y2y3	6.3905
											413.277	3.6372	0	(I)PALL(K)		3142	1	b4	2.6874
											1024.46	8.2305	0	(W)QQPGQGQPGY(Y)		2025	1	b2	14.2699
											966.423	-9.1787	0	(Q)PGQGQPGYY(L)		604	0		0
											524.28	-5.4459	0	(W)LQPGQ(G)		534	1	y1*	0
											1159.58	-7.4363	0	(Y)HVSVEHQAASL(K)		1629	2	b10b11*	13.3661
											749.409	0.0115	0	(Q)QRIFW(G)		560	1	b2*	0
4345	A0A1D5RRQ5	Uncharacterized protein OS=Triticum aestivum OX=4565 PE=3 SV=1	56.448	8.9209	170.415	2	1.5595	2.02	30	12.9201	583.381	-0.8662	6.4622	(W)GIPALL(K)		64980	10	b2b3b4b5b6y1y2y3y4y6	4.9662
	P10388	Glutenin_ high molecular weight subunit DX5 OS=Triticum aestivum OX=4565 GN=GLU-1D-1D PE=3 SV=5	90.238	6.4849	129.208	20	13.3255	9.8231	278	16.8719	1514.73	2.706	6.1313	(Y)SSYHVSVEHQAASL(K)		14703	32	b2b3°b4b4°b5b5°b6b6°b7b7°b8b8°b9b9°b10b10°b11b12b13b13°b14y2°y3y5y5°y6y6*y7y7°y8y9y11	16.1082
											1177.6	0.2341	5.922	(Y)HVSVEHQAASL(K)		74243	23	b1b2b3b3°b4b4°b5b5°b6°b7b8°b10b11y1y2y2°y3y4°y5y6y9°y10°y11	9.1724
											1636.8	0.3314	5.8607	(W)LQPGQGQQGYYPTSL(Q)		7823	21	b5b8b10b10*b11b11*y1y2y2°y3y3°y4y4°y5y7y8y8°y9°y10y13y15	14.0235
											1515.71	-0.8166	5.8252	(Y)SSYHVSVEHQAASL(K)	Deamidation Q (10)	3588	17	b3°b4b5b5°b7b7°b8b9b10b10*b11b12b13y6y7*y9y10°	16.0137
											580.297	-1.7543	5.8177	(Y)YPTSL(Q)		6752	11	b2b3b3°b4y1y2y3y3°y4y4°y5	15.5071
											1178.58	3.987	5.6208	(Y)HVSVEHQAASL(K)	Deamidation Q (7)	23156	19	b1b2b3°b4b5b5°b6b7*b9b11°y1y2y2°y5y6y7y9y9°y11	12.5797
											1637.78	1.6776	5.5567	(W)LQPGQGQQGYYPTSL(Q)	Deamidation Q (5)	9706	12	b7b10b10*b11b13y1y2y4y4°y5y8y13	15.8276
											1875.91	0.8609	5.4822	(L)KRYYPSVTCPQQVSY(Y)	Carbamidomethyl C (9)	6477	10	b1b4b7b9b13b14y2y6y8*y11	13.196
											769.461	-0.0501	5.407	(F)WGIPALL(K)		3747	6	b2b5b6y2y4y7	19.2495
											1523.71	-0.6483	5.2941	(L)QPGQGQQGYYPTSL(Q)		1412	6	b1b9b10y2y4y5	14.9681
											2038.89	3.6229	5.2585	(W)YYPTSPQESGQGQQPGQW(Q)	Deamidation Q (7)	4730	6	b13b14y1y4y13y18	11.0214
											2061.97	2.1864	5.2574	(L)AAQLPAMCRLEGGDALSASQ(-)	Oxidation M (7), Carbamidomethyl C (8)	7928	16	b3b6*b7b11b16b19b20y1*y2y3°y4y5y6y6*y7y16	22.0367
											2039.87	6.2724	5.2089	(W)YYPTSPQESGQGQQPGQW(Q)	Deamidation Q (11), Deamidation Q (17)	3304	7	b14y2y4y7y9y13y18	14.4654
											968.473	0.4264	5.1507	(W)YYPTSPQL(S)		1561	4	b4y3y6y8	9.8725
											1146.58	0.7545	5.1307	(L)AAQLPAMCRL(E)	Oxidation M (7), Carbamidomethyl C (8)	1733	6	b4b7y1y4y5y6	13.7181
											1222.54	-6.2731	4.8611	(W)QQPGQGQPGYY(L)		441	4	b6b7*y9y11*	8.8284
											960.453	0.127	0	(Y)HVSVEHQAA(S)	Deamidation Q (7)	461	3	b9y4y8°	8.7901
											1046.5	0.5567	0	(Y)HVSVEHQAAS(L)		5224	10	b10y3y3°y4y4*y4°y5°y6°y9y9°	30.5928
											1205.52	1.0855	0	(W)QQPGQGQPGYY(L)		3583	0		0
4403	A0A1D6D5D1	Uncharacterized protein OS=Triticum aestivum OX=4565 PE=3 SV=1	58.293	6.2593	144.824	4	5.5556	9.1304	50	16.7216	1396.66	1.938	5.5369	(L)ALQTLPAMCNVY(I)	Oxidation M (8), Carbamidomethyl C (9)	10389	14	b2b3b4b4°b5b5°b8°b10°b11y1y2y4y7y9*	12.3645
	P04726	Alpha/beta-gliadin clone PW1215 OS=Triticum aestivum OX=4565 PE=3 SV=1	33.92	8.5225	107.109	7	14.527	3.5835	66	18.2741	608.306	3.4925	5.3701	(F)GIFGTN(-)		1397.71	11	b5y1y2y2*y2°y3y3°y4y4*y4°y6	16.6612
	P04722	Alpha/beta-gliadin A-II OS=Triticum aestivum OX=4565 PE=2 SV=1	33.639	6.8247	103.504	9	19.9313	3.1204	96	18.2913	567.278	1.8461	5.3585	(L)SQVSF(Q)		1168	12	b2*b2°b3b3*b3°b4b4*b5°y1y2y4y4°	25.3255
											778.375	2.816	5.3107	(L)VQEQQF(Q)		4669	14	b2*b3b4b4*b4°b5b5°b6y2y2*y3y3*y6y6*	19.3769
											1493.67	2.1853	5.0606	(F)QQPQQQYPSGQGF(F)	Deamidation Q (1)	4652.96	12	b3b4b5b6*b7y5*y6y6*y6°y7y7*y9*	18.5335
											1495.64	6.3115	4.8474	(F)QQPQQQYPSGQGF(F)	Deamidation Q (1), Deamidation Q (5), Deamidation Q (6)	4392.45	10	b4*b13y4y5*y6y6°y7y8*y8°y11	19.4911
											1397.65	3.7102	4.781	(L)ALQTLPAMCNVY(I)	Oxidation M (8), Carbamidomethyl C (9), Deamidation N (10)	2725	6	b3b4b4°b5°y5y7	8.3547
											1492.68	0.9237	4.7755	(F)QQPQQQYPSGQGF(F)		1920.17	7	b4b4*b6*b7*y2y6y6*	24.9659
											1952.07	1.0542	4.5594	(L)QQILQQQLIPCRDVVL(Q)	Deamidation Q (5), Carbamidomethyl C (11)	392.926	10	b1b2b2*b3b3*b4b4*b7*y1y7°	11.2663
4404	A0A1D5US94	Uncharacterized protein OS=Triticum aestivum OX=4565 PE=3 SV=1	38.743	6.063	186.964	16	20.5714	3.0384	115	17.0998	1026.67	0.7034	6.0655	(Y)KLTPVSRLL(V)		9132	12	b1b2b3b4y1y2y4y5y6y7y8y9	18.3234
	A0A1D5RRQ5	Uncharacterized protein OS=Triticum aestivum OX=4565 PE=3 SV=1	56.448	8.9209	175.394	2	1.5595	1.1552	30	8.3614	976.545	-0.7617	5.981	(Y)RSIIEVYP(-)		26534	10	b1b3b3°b4b5b6b7y1y2y3	14.484
	A0A1D5RXM0	Uncharacterized protein OS=Triticum aestivum OX=4565 PE=4 SV=1	42.448	8.0479	96.4855	2	2.8871	3.1114	30	20.5479	922.506	-0.1468	5.9155	(Y)KITPMLGY(R)		10228	13	b3b3°b5b5°b7b7°b8y1y2y3y5y6y6°	22.0905
											913.584	1.0056	5.5842	(Y)KLTPVSRL(L)		6413	3	y5y6y7	3.4554
											1214.67	1.7884	5.5416	(F)EYVPPADVVLL(K)		5545	8	b2b7b8b9b10y1y2y8	19.526
											1702.79	-1.125	5.4845	(F)SVDQGRHADANDVRY(K)		26371	14	b1b2b11b12b12*b14y1y2y3y4y6y7°y13y15*	11.7516
											1703.77	0.5911	5.4173	(F)SVDQGRHADANDVRY(K)	Deamidation N (11)	8865	9	b2b9b11b12y1y2y3y6y9	9.5534
											978.516	1.6564	5.3281	(F)LDPSYVTAL(C)		4023	10	b5b6b7b8b8°b9y5°y7y7°y9	14.281
											1361.71	1.4604	5.3223	(L)VGDYNQSPIVRL(F)	Deamidation N (5)	1249	5	b3y5y6y8y9	12.0905
											1360.73	2.9758	5.0031	(L)VGDYNQSPIVRL(F)		2596	7	b3b9y2y5y6y7y8	20.4193
											741.429	-4.8716	0	(Y)KITPMLG(Y)		470	0		0
											681.327	-0.4028	0	(I)TPMLGY(R)		608	6	b1b2°b3°b4b5b5°	17.6632
											580.282	2.602	0	(T)PMLGY(R)		687	3	b2b3b4	5.3417
											698.42	1.0718	0	(Y)RSIIEV(Y)		1161	0		0
											861.484	1.1452	0	(Y)RSIIEVY(P)		3926	0		0
											1516.69	3.6869	0	(V)DQGRHADANDVRY(K)		359	9	b2°b4b4°b6b6°b7°b9*b10b10*	17.3392
4481	A0A1D6DC72	Uncharacterized protein OS=Triticum aestivum OX=4565 PE=4 SV=1	22.535	6.5771	498.791	11	22.1675	8.0348	130	18.4885	1413.73	0.3947	6.7589	(F)LRSQVVQHSSCL(V)	Carbamidomethyl C (11)	11815	26	b2b3b4b5b5*b6b7b7*b8b9b9°b10b10°b11b11°b12y2y3y5y5°y6y6°y7y7*y10y11	14.8925
	A0A1D5XYY9	Uncharacterized protein OS=Triticum aestivum OX=4565 PE=3 SV=1	54.933	6.9097	283.967	4	7.9918	8.5773	50	18.2063	1300.64	-0.9186	6.4993	(L)RSQVVQHSSCL(V)	Carbamidomethyl C (10)	14353	24	b1b2b2°b3b3*b4b4*b5b5*b6b6*b7b7*b8b8°b9b9°b10b10°b11y1y2y5y6*	15.0605
											965.381	-0.2157	6.3394	(W)EQCCQQL(K)	Carbamidomethyl C (3), Carbamidomethyl C (4)	6371	14	b2°b3°b4°b5b5°b6b6°b7y1y3y3*y4y4*y5	16.0419
											1301.62	-1.307	6.1837	(L)RSQVVQHSSCL(V)	Deamidation Q (3), Carbamidomethyl C (10)	9257	19	b1b2b3b3*b3°b4b4°b5b5°b6b6*b7b7*b9°y2y4y4°y5y11	19.4875
											1414.71	1.7708	5.9884	(F)LRSQVVQHSSCL(V)	Deamidation Q (4), Carbamidomethyl C (11)	7583	14	b2b3b5*b7b8b9b9°b12y1y2y5y8y10y10*	17.4653
											1647.83	4.5989	5.9579	(M)SFLRSQVVQHSSCL(V)	Carbamidomethyl C (13)	4394	9	b4b5b6b7b8b9y4y5y7	31.4334
											1414.71	-0.2758	5.6276	(F)LRSQVVQHSSCL(V)	Deamidation Q (7), Carbamidomethyl C (11)	2912	6	b2b4b5b6y4°y12	10.0965
											1732.84	6.7481	5.3562	(L)RSQVVQHSSCLVMW(E)	Carbamidomethyl C (10), Oxidation M (13)	2852	8	b5b6b11b13y2y3y8y9°	21.3168
											958.483	5.8056	4.5928	(L)NPCRDALL(H)	Carbamidomethyl C (3)	10666	4	b4*b5*b6b6*	16.8198
											1304.74	24.4347	4.5687	(L)IVIAATTTAAEPF(T)		852	5	b2b9°y3°y5°y9°	26.905
											1169.55	2.5915	0	(L)RSQVVQHSSC(L)	Carbamidomethyl C (10)	980	1	y2°	0
4482	A0A1D6DC72	Uncharacterized protein OS=Triticum aestivum OX=4565 PE=4 SV=1	22.535	6.5771	795.731	11	22.1675	6.0751	130	18.5256	1413.73	-1.1103	6.902	(F)LRSQVVQHSSCL(V)	Carbamidomethyl C (11)	8951	20	b2b3b4b5b5*b6b7b7°b8b9y2y4y5y5°y6°y7y7°y9y11y12*	14.9674
	A0A1D5SZL7	Uncharacterized protein OS=Triticum aestivum OX=4565 PE=3 SV=1	58.292	9.1597	176.004	3	6.7925	4.1992	45	17.0515	1300.64	-1.5845	6.777	(L)RSQVVQHSSCL(V)	Carbamidomethyl C (10)	13189	22	b1b2b3b3*b4b4*b4°b5b6b6*b7b7*b8b8°b9°b10b11b11°y2y4y5y6°	15.8857
	W5ASG0	Uncharacterized protein OS=Triticum aestivum OX=4565 PE=3 SV=1	55.864	6.1421	174.915	3	2.5794	5.6301	46	13.9389	759.441	1.201	6.7353	(W)IVAIGTW(V)		27544	17	b2b3b4b5b6b6°b7b7°y1y2y2°y3y3°y4y4°y6°y7	6.1689
	A0A1D6RN23	Uncharacterized protein OS=Triticum aestivum OX=4565 PE=3 SV=1	57.261	6.8745	172.727	4	7.1571	5.3618	47	18.4579	1301.62	-1.4054	6.5896	(L)RSQVVQHSSCL(V)	Deamidation Q (6), Carbamidomethyl C (10)	8510	20	b1b2b3b4b4*b5b5*b6b6*b7°b8°y2y3y5y5°y7y9y10y10°y11	23.0322
											965.382	0.5013	6.5258	(W)EQCCQQL(K)	Carbamidomethyl C (3), Carbamidomethyl C (4)	6378	17	b2*b2°b3°b4°b5b5°b6b6*b6°b7b7°y1y3y3*y4y5y6*	16.1062
											1414.71	0.5204	5.9964	(F)LRSQVVQHSSCL(V)	Deamidation Q (4), Carbamidomethyl C (11)	5574	12	b4°b7b8b9b9°y1y2y4°y5y8y8°y10	21.8986
											966.371	5.7017	5.692	(W)EQCCQQL(K)	Carbamidomethyl C (3), Carbamidomethyl C (4), Deamidation Q (5)	7981	11	b2°b3b3°b4°b5b5°b6b6*y2*y4*y5	14.2936
											1381.58	4.3751	5.4544	(L)VMWEQCCQQL(K)	Carbamidomethyl C (6), Carbamidomethyl C (7)	5569	6	b7°b9b9°y2*y6y10	27.8045
											1563.71	18.6144	4.8615	(Y)TTISSSSDVTTGMGGY(-)		2135	3	b5°y5y8°	44.277
											948.355	0.3869	0	(W)EQCCQQL(K)	Carbamidomethyl C (3), Carbamidomethyl C (4)	473	0		0
											1169.55	-0.0015	0	(L)RSQVVQHSSC(L)	Carbamidomethyl C (10)	869	2	b8y2°	14.0573
4489	W5FPA9	Uncharacterized protein OS=Triticum aestivum OX=4565 PE=4 SV=1	18.037	6.2432	244.758	3	14.8387	8.083	45	16.2563	1122.58	-7.5222	5.9678	(Y)INSGEKTARF(T)		117699	22	b2b2*b3b3*b3°b4b4*b4°b5°b6b6°b7b7°b9b9*b10y1y3y7y7°y8y8°	15.0308
	A0A1D5U5R5	Uncharacterized protein OS=Triticum aestivum OX=4565 PE=4 SV=1	42.587	9.9771	215.862	3	5.974	3.3377	47	15.2764	1123.56	-8.7259	5.0774	(Y)INSGEKTARF(T)	Deamidation N (2)	34782	11	b3°b4b4°b6°b7b8°b10b10*y1y3y10*	16.598
	W5ASG0	Uncharacterized protein OS=Triticum aestivum OX=4565 PE=3 SV=1	55.864	6.1421	173.909	2	1.5873	6.7546	56	18.0863	1407.69	-0.4365	4.9622	(L)TLATGGDTRKQEM(T)		2259	5	b4°b8b8°y5°y10	22.1858
4491	A0A1D5T3T7	Uncharacterized protein OS=Triticum aestivum OX=4565 PE=4 SV=1	36.4	6.8115	663.198	36	27.0096	7.7258	486	16.3292	2222.1	1.9358	7.3217	(Y)SQEQPLPQQQPSVEEKQQL(N)	Deamidation Q (8)	47416	33	b1b2°b3b3*b4b4*b4°b6b6°b7b7*b8b8*b9b10b13b14b18b19y2y4y5y6y7y8y8°y9y10y13y13°y15y16y17	16.2235
	A0A1D6RER0	Uncharacterized protein OS=Triticum aestivum OX=4565 PE=4 SV=1	36.551	7.5483	156.9	10	18.2965	2.3429	141	15.0573	1480.71	1.4081	7.1139	(F)SQYQQPLTQQPY(S)		42826	36	b1b1°b2b2*b2°b3b3°b4b4*b4°b5b5*b5°b7b8b8°b9b9*b9°b10b10°b11y1y2y3y3*y4y4*y5*y6*y6°y7y7°y8y8°y10	19.4441
	A0A1D5RRQ5	Uncharacterized protein OS=Triticum aestivum OX=4565 PE=3 SV=1	56.448	8.9209	154.891	2	1.5595	3.9857	32	10.4707	726.415	1.1201	7.0501	(F)LQQQPL(I)		27205.4	18	b2b2*b3b3*b4b4*b5b5*b6b6*y1y2y3y3*y4y4*y6y6*	13.8436
											1481.7	3.3208	6.894	(F)SQYQQPLTQQPY(S)	Deamidation Q (9)	82792	31	b1b2b2*b2°b3b3*b3°b4b4*b5b5*b5°b6*b7b7*b7°b8b8*b8°b9b9*b9°b10b10°y1y2y3y3*y6°y7y8°	15.5191
											2223.08	2.6561	6.8797	(Y)SQEQPLPQQQPSVEEKQQL(N)	Deamidation Q (8), Deamidation Q (10)	46819	30	b2*b2°b3b3°b4b4*b6b6*b6°b7b7°b8b9b9*b9°b10°b18y4y5y6y7y9y9*y10y10*y11y13y15y17y19*	16.7013
											810.38	-2.4292	6.8532	(L)NLCKEF(L)	Carbamidomethyl C (3)	82298.4	23	b1b1*b2b2*b3b3*b4b4*b5b5*b5°b6b6*y1y2y2°y3y3°y4y4°y5y5°y6*	15.5311
											1482.68	2.0671	6.7364	(F)SQYQQPLTQQPY(S)	Deamidation Q (4), Deamidation Q (9)	62279	20	b2b2*b3b3°b5b5*b6°b7b8*b9b9°b10b10°y1y2y3y3*y7y9*y12	15.6038
											2221.12	4.0657	6.6696	(Y)SQEQPLPQQQPSVEEKQQL(N)		17241	26	b2b2*b3b3*b4b4*b6b6*b6°b8b8°b9b10b10*b13b18y1y4y5y6*y7y9y9°y13y15y19*	17.7
											864.412	2.0095	6.657	(F)SQYQQPL(T)	Deamidation Q (4)	6463	12	b3b4b4°b5b5°b6b6*y1y3y4*y5y7	9.9291
											1371.69	0.5684	6.5779	(F)LLQQCNPEEKL(S)	Carbamidomethyl C (5)	9266.28	14	b2b3b6y2y3y4y5y6*y7y7*y8y8°y9y11	13.5511
											863.428	2.1541	6.5509	(F)SQYQQPL(T)		13057	15	b2b2*b2°b3b3*b4b4*b4°b5b5*b6b6°y1y2y7*	15.5024
											727.399	0.4262	6.5209	(F)LQQQPL(I)	Deamidation Q (4)	22935.3	13	b2b2*b3*b4b4*b5b6y2y3y3*y5y5*y6	19.5911
											895.462	-1.9013	6.4287	(F)GQPQPQQL(G)		4646.97	11	b2*b3b4b6b7y1y2y2*y4y4*y6	15.5842
											690.388	9.1919	6.4265	(L)QSVIPF(L)		68956	16	b2b2*b2°b3b3°b4b4°b5b5*b5°b6y1y2y3y5y6	11.8787
											1482.68	5.011	6.2625	(F)SQYQQPLTQQPY(S)	Deamidation Q (4), Deamidation Q (9)	33396	15	b3b4b4*b5b5°b8°b10y1y2y3*y4y7°y8y8°y9	14.1095
											1103.54	-1.137	6.2463	(Y)QQPLTQQPY(S)	Deamidation Q (6)	12590	11	b1b3*b5b5*b6°b7b7*b7°b9y2y7	7.8503
											864.407	-3.6566	6.2402	(F)SQYQQPL(T)	Deamidation Q (5)	7148	12	b3b4b4°b5b5°b6b6*b7*y5y5*y6y7	17.6451
											1372.68	1.6414	6.1401	(F)LLQQCNPEEKL(S)	Deamidation Q (3), Carbamidomethyl C (5)	6734.34	11	b2b9°y2y3y3°y5y7y8y9y9°y11	14.6997
											801.457	4.4018	6.0758	(L)VIQTLPM(L)		16435.6	7	b4b4°b5b5°y2y3y7	7.2081
											1104.52	-2.5676	6.0574	(Y)QQPLTQQPY(S)	Deamidation Q (1), Deamidation Q (7)	6926	12	b2b2*b3*b4*b5b5°b6°b7b7°y2y4y7	18.364
											1481.69	1.6128	6.0508	(F)SQYQQPLTQQPY(S)	Deamidation Q (5)	12850	9	b5b5*b8b9b9*b10b10*y3*y7	18.79
											1483.66	1.0823	6.0236	(F)SQYQQPLTQQPY(S)	Deamidation Q (2), Deamidation Q (4), Deamidation Q (10)	16031	9	b3°b5°b9b10y1y2y4*y5y6	12.943
											727.399	0.2177	6.0072	(F)LQQQPL(I)	Deamidation Q (2)	10009.5	12	b2b3b3*b4*b5b5*b6*y3y3*y4*y5*y6	15.3991
											1991.97	-0.0651	5.9434	(M)QQQHVDRGFGQPQPQQL(G)	Deamidation Q (11)	1172.47	7	b2*b6y4*y6y8y14y17	10.3456
											1103.54	0.3232	5.9181	(Y)QQPLTQQPY(S)	Deamidation Q (7)	3212	12	b2*b3b4*b5*b6*b7*y2y4*y5y7y7*y9*	9.4482
											2224.07	3.7147	5.8712	(Y)SQEQPLPQQQPSVEEKQQL(N)	Deamidation Q (8), Deamidation Q (9), Deamidation Q (10)	15634	10	b6b7b8b9b10*y5y6y9*y15y19	17.4442
											1102.56	2.4988	5.8555	(Y)QQPLTQQPY(S)		1056	14	b2b3*b4*b5b5*b5°b6b6*b8*y3y5y7y7*y9*	15.5571
											1103.54	3.9474	5.6612	(Y)QQPLTQQPY(S)	Deamidation Q (1)	6232	10	b1b5b5°b6°b7*b7°y1y2y3y7	16.7687
											636.272	-42.5242	5.6391	(L)TQQPY(S)		1296	7	b2*b3b3*b4b5*y4y5	33.2889
											635.281	4.7334	0	(F)SQYQQ(P)		864	4	b3*y1*y2*y3	29.8778
											733.318	4.5156	0	(F)SQYQQP(L)	Deamidation Q (5)	1743	1	y3*	0
											847.412	-8.5604	0	(Q)PLTQQPY(S)	Deamidation Q (4)	1153	6	b3b3°b4b4°b5*b7°	18.9839
											1607.79	-2.2446	0	(Q)HVDRGFGQPQPQQL(G)	Deamidation Q (8)	1217	2	b2b8	6.6538
											710.381	-2.9731	0	(Q)PQPQQL(G)		615	3	b2b4b5	19.635
											485.272	0.8917	0	(Q)PQQL(G)		1022	1	b3	0.5144
											635.283	7.2209	0	(F)SQYQQ(P)		960	1	y1	15.3113
1084	A0A1D5YFA7	Beta-amylase OS=Triticum aestivum OX=4565 PE=3 SV=1	55.289	5.7627	226.859	21	34.8361	3.6103	258	19.0464	1377.64	2.8511	6.2423	(L)RYPSYPQSHGW(S)		13368	21	b1b2b4b5b6b7b7°b8b8°b9b9*b9°b10b11y2y3y4y5*y6y6°y9	11.825
	A0A1D5YFA6	Beta-amylase OS=Triticum aestivum OX=4565 PE=3 SV=1	58.827	5.2969	225.066	21	32.381	3.3984	255	18.8394	1378.62	-0.7326	6.1234	(L)RYPSYPQSHGW(S)	Deamidation Q (7)	9047	14	b1b2b4b5b5°b7b8b8°b9y2y3y4y6y11	13.3283
	A0A1D5XGF4	Beta-amylase OS=Triticum aestivum OX=4565 PE=3 SV=1	56.738	5.4097	223.175	24	36.9048	3.2876	279	18.8215	822.494	-0.0695	6.0563	(F)LGHRVQL(A)		10807	14	b2b3b4b6*b7y1y2y2*y4y4*y5y6y7y7*	23.8837
	A0A1D5XXC8	Beta-amylase OS=Triticum aestivum OX=4565 PE=3 SV=1	59.121	4.9863	221.319	18	25.7576	3.5107	214	18.1436	755.41	1.4091	5.974	(Y)VNFKTF(V)		1363	11	b2b3b4b5b5*y1y2y3y4y6y6*	16.3914
	A0A1D5XXC9	Beta-amylase OS=Triticum aestivum OX=4565 PE=3 SV=1	58.889	5.0376	221.319	18	25.8064	3.5107	214	18.1436	815.358	1.5491	5.9195	(F)FVDNGTY(L)		6304	17	b2b4b5b5*b6b6*b6°b7b7*b7°y3y3°y4y4°y5y5°y7	20.3636
	W5EKI0	Beta-amylase OS=Triticum aestivum OX=4565 PE=3 SV=1	61.074	4.8252	221.319	18	24.7273	3.5107	214	18.1436	1024.6	1.8963	5.7688	(L)AIKISGIHW(W)		9707	10	b2b7b8b9y2y4y5y6y7y9	17.6228
	A0A1D5XXC7	Beta-amylase OS=Triticum aestivum OX=4565 PE=3 SV=1	60.045	4.9424	221.319	18	25.2319	3.5107	214	18.1436	1420.72	3.2249	5.7447	(L)RLSNQLVEGQNY(V)		4372	14	b2b4b5*b6b7b8b9b10y1y2y2*y5°y6y8°	13.5559
											850.443	1.939	5.5595	(Y)LTEQGRF(F)		2247	5	b2y3y4y5y6	15.1903
											1210.67	0.4484	5.5509	(L)AIKISGIHWW(Y)		5448	5	b2b8y3y6y8	11.7012
											1695.78	2.1581	5.4511	(W)SFPGIGEFICYDKY(L)	Carbamidomethyl C (10)	3162	8	b5y3y5y6y7y9y10y14	20.5648
											997.514	3.7815	5.409	(Y)LTEQGRFF(L)		10125	7	b2°b3b3°y4y5y6y8	7.4293
											1289.58	-3.0884	5.4055	(W)SFPGIGEFICY(D)	Carbamidomethyl C (10)	2472	8	b4°b5b8b9b9°y1y2y9	15.6509
											1373.74	1.226	5.4049	(L)AIKISGIHWWY(K)		5578	10	b3b4b8b10°y2y4y6y7y8y8°	17.9215
											1609.77	7.2133	5.3047	(F)YTDQHGTRNIEYL(T)		3032	10	b2b2°b9°b10b11b12y3y6y7y8	22.4892
											957.49	1.0165	5.2962	(L)TLGVDDQPL(F)		1795	9	b1b3°b5°b6°b7b7°y8°y9y9*	14.2172
											1574.83	-3.1269	5.2667	(Y)VMLPLDAVSVNNRF(E)		1520	11	b2b3b9°y1y6y7y8y9y10y11°y14	17.8727
											2629.29	-3.7232	5.1671	(F)KTFVDRMHANLPHDPCVDPVAPL(Q)	Carbamidomethyl C (16)	459	5	b2°b18b22°y12°y21	17.2399
											1692.84	2.3404	5.1431	(W)WYKVPSHAAEITAGY(Y)		1540	8	b2b4b8b8°b11y1y11y15	18.5295
											1421.7	-4.7288	5.1257	(L)RLSNQLVEGQNY(V)	Deamidation N (4)	1204	7	b4b5b5*b6b8b10y1	25.8317
											1195.57	3.7159	5.113	(L)FHGRSAVQMY(T)		3659	4	b2b6b7b8	7.9628
											1726.95	1.6978	5.1048	(L)IKHGDKILDEANKVF(L)		3272	7	b5b6b13b14y3y4y8°	23.5429
4055	A0A1D5ZZT8	Uncharacterized protein OS=Triticum aestivum OX=4565 PE=4 SV=1	55.067	6.7104	278.741	19	33.1301	10.3561	131	20.1833	918.53	0.8463	6.2229	(F)VIPAGSIVY(S)		11658	12	b2b4b5b6b6°b7b7°b8y3y6°y7y9	20.4109
	A0A1D5XS09	Uncharacterized protein OS=Triticum aestivum OX=4565 PE=4 SV=1	68.865	7.2466	198.006	10	15.3846	2.5587	97	19.3664	780.341	0.0041	6.0459	(Y)DADEIAF(V)		2799	7	b2b3b4b5b6b6°y3	17.8086
	W5FPA9	Uncharacterized protein OS=Triticum aestivum OX=4565 PE=4 SV=1	18.037	6.2432	157.826	2	12.9032	4.8502	25	15.8695	1007.52	4.2899	5.8216	(F)SDEVIRAAF(N)		10606	8	b1b2b2°b3y4y5y6y7°	9.1812
	W5ECA4	Uncharacterized protein OS=Triticum aestivum OX=4565 PE=4 SV=1	69.407	6.6094	123.206	13	16.3961	4.2356	121	18.8887	1323.57	-1.181	5.5243	(Y)HFGEESFREW(A)		2943	5	y5y6y8y9y10	6.4083
	W5EST8	Uncharacterized protein OS=Triticum aestivum OX=4565 PE=4 SV=1	70.575	6.7163	123.01	7	12.1212	8.7638	80	19.1923	1070.58	0.5219	5.477	(F)VAGNEGNLALL(S)		6908	12	b5b6b7b7*b8b9b9*b9°b10b10*y1y11*	23.6691
	A0A1D5SCN9	Glucose-1-phosphate adenylyltransferase OS=Triticum aestivum OX=4565 PE=3 SV=1	58.489	6.0981	98.1659	7	15.1515	2.5637	68	21.0327	1414.67	0.9305	5.4591	(Y)IVVEGRDGYFEM(A)		1681	6	b2b10y2°y8y9y10	12.0396
											981.448	2.1751	5.3892	(F)CVREGDVF(V)	Carbamidomethyl C (1)	3837	8	b2b3b5b5°b6b7y1y6	26.9824
											1131.6	-1.1417	5.2456	(M)LLNPVSTPGSF(Q)		2336	7	b7y1y2°y3°y4y8y10°	25.7508
											1534.77	0.2798	5.1965	(F)NTRQREDVDRVF(E)		6923	11	b2*b3°b7*b10*b12b12°y1y3y5y6y11	10.6442
											1070.62	3.9449	5.195	(F)VREGEGVLVL(L)		1936	5	b4b5b7b8y1	11.5778
											1086.62	1.893	5.1854	(L)KQLDEAAKAL(A)		8270	12	b1b2*b3b5°b7b8b9b10y2y3y8y10	22.825
											746.401	-4.1248	5.0559	(F)VTGGNSVL(K)		2819	7	b2b3°b5b5*b7b7*y8	9.0486
											747.38	2.1219	5.0255	(L)DAAPRAF(L)		3734	5	b2b5y4y6y7	6.8019
											860.467	4.8194	4.9199	(L)DAAPRAFL(Q)		1656	4	b2b3°b4y5	19.0334
											773.391	15.391	4.8827	(F)VAGNEGNL(A)		1245	6	b5°b6*b8y1y7y8	31.4636
											1059.56	-0.117	4.6658	(L)AFPQQAREL(A)		1889	4	y2°y5y6*y8°	31.312
											2362.17	7.4018	4.634	(F)ETKSRGEGQISEGSEEQIREL(S)		1763	6	b5b9°y6y7y9y9*	23.8276
											939.452	-40.6733	4.5034	(W)AKSRHGHF(K)		1655	5	b2b3b6y5y8	24.1512
											490.277	0.2321	0	(A)PRAF(L)		696	1	b1	24.5223

## Sheet: Table S3
Table S3. List of all 127 reliable protein hits directly quantified by mass spectrometry.
UniProt Accession	Peptide count	Unique peptides	Confidence score	Anova (p)	Description	Normalized abundance															Fold change			Tukey´s HSD (p)
						Panna			Sotnytsia			Ukrainka			Mean			Standard deviation			Panna/ Sotnytsia	Panna/ Ukrainka	Sotnytsia/ Ukrainka	Panna/ Sotnytsia	Panna/ Ukrainka	Sotnytsia/ Ukrainka
						R1	R2	R3	R1	R2	R3	R1	R2	R3	Panna	Sotnytsia	Ukrainka	Panna	Sotnytsia	Ukrainka
Q6SPZ3	76	28	798.466	3.05268e-06	Low molecular weight glutenin OS=Triticum aestivum OX=4565 GN=Glu-A3 PE=4 SV=1	297699	286599	335946	60411.6	41393.3	42173.8	351348	408258	391496	306748	47992.9	383701	25888.1	10762	29244.8	6.39152	-1.25087	-7.99495	0.0010053	0.200096	0.0010053
A0A1D6CGQ8	2	2	17.6458	1.29158e-05	Uncharacterized protein OS=Triticum aestivum OX=4565 PE=4 SV=1	14637.3	18408.8	18680.3	91596.1	93828.4	67101.1	17832	14990.1	15265.6	17242.1	84175.2	16029.2	2259.94	14828.7	1567.3	-4.88195	1.07567	5.25136	0.0010053	0.816178	0.0010053
Q00M56	74	16	860.391	1.64494e-05	LMW-GS P-31 OS=Triticum aestivum OX=4565 GN=GluD3-3 PE=2 SV=1	130247	157276	173549	68160	66639.1	65072.9	196544	230220	213986	153690	66624	213583	21872.3	1543.59	16841.5	2.30683	-1.3897	-3.2058	0.0010053	0.0129837	0.0010053
D2DII3	49	12	465.008	2.61373e-05	Glutenin low molecular weight subunit OS=Triticum aestivum OX=4565 PE=3 SV=1	175932	222303	238182	60082.6	39764.2	40949.9	257987	302505	267267	212139	46932.2	275920	32345.6	11404	23486.4	4.52012	-1.30065	-5.87911	0.0010053	0.204324	0.0010053
A0A1D5S346	49	21	576.205	3.35788e-05	Uncharacterized protein OS=Triticum aestivum OX=4565 PE=4 SV=1	387114	448634	448717	320817	287661	259995	723846	845764	757770	428155	289491	775793	35542.6	30452	62925.4	1.47899	-1.81194	-2.67985	0.0043821	0.0010053	0.0010053
B2Y2Q1	73	9	836.983	3.604e-05	Low molecular weight glutenin subunit OS=Triticum aestivum OX=4565 GN=GluB3-1 PE=4 SV=1	279345	292912	268709	112343	83999.8	78571	248095	277596	261033	280322	91638	262241	12130.9	18135.5	14787.8	3.05902	1.06895	-2.86171	0.0010053	0.758535	0.0010053
B2Y2Q6	88	26	983.985	0.00017832	Low molecular weight glutenin subunit OS=Triticum aestivum OX=4565 GN=GluB3-2 PE=4 SV=1	1.94153e+06	2.00705e+06	2.10449e+06	318682	102216	128858	1.7461e+06	2.05384e+06	1.83158e+06	2.01769e+06	183252	1.87717e+06	81999.7	118040	158858	11.0105	1.07486	-10.2437	0.0010053	0.899995	0.0010053
A0A1D5YUG2	2	2	23.5358	0.000181204	Uncharacterized protein OS=Triticum aestivum OX=4565 PE=4 SV=1	33305.7	39225	41305.1	70846.1	55973.8	75372.3	26685.1	24914	27437.3	37945.3	67397.4	26345.5	4150.43	10148.7	1295.46	-1.77617	1.4403	2.55821	0.0021856	0.0197872	0.0010053
P10386	73	18	781.998	0.000200355	Glutenin low molecular weight subunit 1D1 OS=Triticum aestivum OX=4565 PE=2 SV=1	403608	461204	585876	308831	371398	318635	862466	993803	925478	483563	332955	927249	93168.6	33651.9	65686.2	1.45234	-1.91754	-2.78491	0.0316461	0.0018806	0.0010053
A0A1D5S0Z9	38	6	409.582	0.00111114	Uncharacterized protein OS=Triticum aestivum OX=4565 PE=4 SV=1	141483	198678	159583	75117.9	51455.4	45353.2	120675	121039	105103	166581	57308.8	115605	29232.5	15722	9097.26	2.90673	1.44095	-2.01723	0.0010053	0.124955	0.0076354
A0A1D5Y5R1	22	2	254.62	0.00265928	Uncharacterized protein OS=Triticum aestivum OX=4565 PE=4 SV=1	64988.3	41302.7	37678.9	155623	98320.7	140857	140053	109168	120785	47990	131600	123336	14832.1	29751.4	15599.5	-2.74224	-2.57003	1.06701	0.0039091	0.0050606	0.899995
P0CZ10	15	2	134.403	0.00482733	Avenin-like a6 OS=Triticum aestivum OX=4565 PE=3 SV=1	1845.78	828.779	1367.32	4266.87	5377.01	2717.16	4895.72	4024.9	4744.37	1347.29	4120.35	4555	508.795	1335.97	465.271	-3.05825	-3.38086	-1.10549	0.0105907	0.0061697	0.850361
A0A0E3Z7G8	40	2	464.899	0.00852951	Alpha-gliadin (Fragment) OS=Triticum aestivum OX=4565 PE=4 SV=1	1486.33	1802.28	3760	3150.69	1505.23	2932.32	7055.17	9827.25	8322.17	2349.54	2529.41	8401.53	1231.67	893.66	1387.74	-1.07656	-3.57582	-3.32153	0.899995	0.011396	0.0166235
A0A1D6A9A5	6	6	63.3979	2.45092e-06	Uncharacterized protein OS=Triticum aestivum OX=4565 PE=3 SV=1	73491.8	72670	70046.2	51562.2	53887.4	54066	74212.9	75144.6	73854.3	72069.3	53171.9	74404	1799.61	1396.85	666.011	1.3554	-1.03239	-1.39931
M9TG60	42	8	515.345	2.39484e-05	Gamma-gliadin 1 OS=Triticum aestivum OX=4565 PE=2 SV=1	321848	319592	316466	192053	218211	181898	362684	384709	366639	319302	197387	371344	2702.58	18735	11742.3	1.61765	-1.16299	-1.8813
Q2A783	18	5	194.791	2.41626e-05	Avenin-like b1 OS=Triticum aestivum OX=4565 GN=AVNLB PE=1 SV=1	37799.3	38022.1	40061.3	36650.8	35173.5	38285.7	21841.1	22838.9	24844	38627.5	36703.3	23174.6	1246.66	1556.78	1529.32	1.05243	1.6668	1.58377
A0A1D5UZW7	14	2	143.187	5.54305e-05	Elongation factor 1-alpha OS=Triticum aestivum OX=4565 PE=3 SV=1	42806.7	38736.1	38197.6	96574.1	72701.3	84173.8	36041.7	33560.7	36515	39913.5	84483.1	35372.5	2520	11939.4	1586.8	-2.11666	1.12838	2.38839
P08489	65	18	670.965	0.000184225	Glutenin high molecular weight subunit PW212 OS=Triticum aestivum OX=4565 PE=3 SV=1	127743	152585	150773	208047	210728	185221	111323	107863	114883	143700	201332	111356	13849.3	14016.6	3510.18	-1.40105	1.29046	1.808
P02863	52	4	597.622	0.000298064	Alpha/beta-gliadin OS=Triticum aestivum OX=4565 PE=2 SV=2	111308	104046	117646	131015	146929	151616	177237	194221	174230	111000	143186	181896	6805.6	10798.2	10779	-1.28997	-1.6387	-1.27034
P04727	31	8	363.979	0.000777882	Alpha/beta-gliadin clone PW8142 OS=Triticum aestivum OX=4565 PE=3 SV=1	49154.8	55528.5	59246.3	102686	100745	72111.1	120021	125560	117622	54643.2	91847.4	121068	5103.64	17119.6	4071.29	-1.68086	-2.21561	-1.31814
A0A1D6D575	15	15	176.634	0.000796621	Uncharacterized protein OS=Triticum aestivum OX=4565 PE=4 SV=1	508145	539134	569233	398062	419211	374794	527585	488097	523695	538837	397355	513126	30545	22216.8	21763.1	1.35606	1.05011	-1.29135
P01083	8	8	95.1768	0.000799871	Alpha-amylase inhibitor 0.28 OS=Triticum aestivum OX=4565 GN=IMA1 PE=1 SV=3	362308	409045	397576	598417	637710	522066	397384	345454	359302	389643	586064	367380	24357.3	58803.2	26891.2	-1.50411	1.0606	1.59525
I0IT62	13	5	144.834	0.00199694	Alpha/beta-gliadin OS=Triticum aestivum OX=4565 PE=4 SV=1	9126.32	10417.5	11913.2	10578.4	12492.8	9106.71	18418.4	17550.4	19361.7	10485.7	10726	18443.5	1394.7	1697.87	905.889	-1.02292	-1.75892	-1.71951
P04724	44	11	499.388	0.00208488	Alpha/beta-gliadin A-IV OS=Triticum aestivum OX=4565 PE=2 SV=1	132700	149625	176091	158737	193045	182543	261926	246258	258645	152805	178108	255610	21869.9	17578.5	8263.48	-1.16559	-1.67278	-1.43514
P18573	53	21	588.659	0.00219021	Alpha/beta-gliadin MM1 OS=Triticum aestivum OX=4565 PE=1 SV=1	363703	428216	528675	274838	346547	351672	612622	761290	716626	440198	324352	696846	83136	42956.9	76282.3	1.35716	-1.58303	-2.14842
W5ECA4	34	7	397.553	0.00238727	Uncharacterized protein OS=Triticum aestivum OX=4565 PE=4 SV=1	108175	83298.6	69769.3	219213	159133	193950	206345	161646	172889	87080.8	190765	180293	19480.1	30166.4	23251.4	-2.19067	-2.07041	1.05808
A0A1D5XXC7	59	13	647.013	0.00345815	Beta-amylase OS=Triticum aestivum OX=4565 PE=3 SV=1	201278	182407	188323	154569	149546	169410	158198	153371	153608	190669	157842	155059	9652.15	10328.8	2720.77	1.20798	1.22965	1.01795
A0A1D5XS09	28	2	361.666	0.0037307	Uncharacterized protein OS=Triticum aestivum OX=4565 PE=4 SV=1	39000.3	29458.8	24504.5	71211.1	54323.8	67149.3	68585	52532.3	59611.4	30987.9	64228.1	60242.9	7367.86	8814.49	8044.97	-2.07269	-1.94408	1.06615
I0IT51	9	1	115.642	0.00519685	Alpha/beta-gliadin OS=Triticum aestivum OX=4565 PE=4 SV=1	127856	127193	140807	162564	192562	138370	209278	222536	198083	131952	164498	209966	7675.3	27147.4	12241	-1.24665	-1.59122	-1.2764
J7HT09	40	8	435.349	0.00610595	Alpha-gliadin OS=Triticum aestivum OX=4565 GN=Gli-CS-1 PE=4 SV=1	462620	454281	572334	541239	625525	725507	784814	782687	844590	496411	630757	804030	65882.7	92245.3	35142.1	-1.27063	-1.61969	-1.27471
P10846	7	2	91.158	0.00684666	Alpha-amylase inhibitor WDAI-3 (Fragment) OS=Triticum aestivum OX=4565 GN=IHA-B1-2 PE=1 SV=1	10157	9436.86	5864.75	17465.9	23451.6	15676.2	16916.1	16630.7	15607.2	8486.22	18864.6	16384.7	2298.64	4072.06	688.246	-2.22297	-1.93074	1.15136
A0A1D6DLZ4	3	1	25.2063	0.00686769	Uncharacterized protein OS=Triticum aestivum OX=4565 PE=3 SV=1	54386.7	53993.7	58073.9	33775.8	33415.6	44347.4	46013.5	51380.8	47868.2	55484.8	37179.6	48420.9	2250.9	6210.09	2726	1.49234	1.14589	-1.30235
P04726	26	7	285.392	0.00881399	Alpha/beta-gliadin clone PW1215 OS=Triticum aestivum OX=4565 PE=3 SV=1	68718.9	67040.7	74890.6	63672.3	63934.9	50937.8	80792	89519.1	81323.5	70216.7	59515	83878.2	4133.78	7429.21	4892.33	1.17982	-1.19456	-1.40936
A1EHE7	44	8	509.181	0.0124255	Gamma-gliadin OS=Triticum aestivum OX=4565 PE=2 SV=1	385987	444992	437858	425397	512830	407053	553111	655029	568675	422946	448427	592272	32205.2	56524.3	54904	-1.06025	-1.40035	-1.32078
P21292	51	38	577.202	0.0167598	Gamma-gliadin OS=Triticum aestivum OX=4565 PE=3 SV=1	571520	625197	654451	823984	878985	752641	616457	749785	704932	617056	818537	690391	42060.7	63347.7	67842.8	-1.32652	-1.11885	1.18561
B2BZD1	55	26	538.447	0.0172873	LMW-GS OS=Triticum aestivum OX=4565 GN=Glu-D3 PE=4 SV=1	458308	529901	600226	391332	406926	323865	483320	593346	531148	529479	374041	535938	70959.9	44148.1	55169.2	1.41556	-1.0122	-1.43283
A0A1D5YG88	4	4	28.6904	0.0190412	Uncharacterized protein OS=Triticum aestivum OX=4565 PE=4 SV=1	36689.6	32951.2	31125	57106.8	41570.8	45913.1	35310.4	27565.3	34251.8	33588.6	48196.9	32375.8	2836.53	8015.81	4199.51	-1.43492	1.03746	1.48867
M9TK56	47	29	555.912	0.020561	Gamma-gliadin 5 OS=Triticum aestivum OX=4565 PE=2 SV=1	573727	563243	752420	879127	1.15784e+06	837835	854965	939885	914744	629797	958269	903198	106324	174066	43621.6	-1.52155	-1.43411	1.06097
B6UKP0	68	27	815.378	0.0242584	Gamma-gliadin OS=Triticum aestivum OX=4565 GN=ll927 PE=2 SV=1	514567	587350	597527	750739	861264	672676	660365	777767	697536	566482	761560	711890	45246	94758.3	60002.8	-1.34437	-1.25669	1.06977
A0A1D5RVA3	2	2	17.3521	0.0248668	Uncharacterized protein OS=Triticum aestivum OX=4565 PE=4 SV=1	17001	22160.4	22761.3	24723.8	25413.7	26419.4	28966.1	26282.1	27514.2	20640.9	25519	27587.5	3166.51	852.658	1343.49	-1.23633	-1.33654	-1.08106
A0A1D6D530	11	11	119.855	0.0266213	Peroxidase OS=Triticum aestivum OX=4565 PE=3 SV=1	198492	164623	153826	241136	223523	228388	233850	191727	202744	172314	231016	209441	23305.2	9095.8	21845.2	-1.34067	-1.21546	1.10301
P0CZ08	12	1	134.803	0.0269096	Avenin-like a3 OS=Triticum aestivum OX=4565 PE=2 SV=1	5941.1	3917.88	4437.51	13470.7	21110.1	7224.45	9752.31	9397.4	12297.6	4765.5	13935.1	10482.4	1050.73	6954.47	1581.96	-2.92416	-2.19965	1.32938
A0A1D6DLY4	41	7	480.976	0.0283799	Uncharacterized protein OS=Triticum aestivum OX=4565 PE=4 SV=1	276589	299957	324412	195373	281371	234748	314491	376460	336366	300319	237164	342439	23913.8	43050	31427.5	1.26629	-1.14025	-1.44389
A0A1D5RP45	6	6	47.6524	0.0303981	ATP synthase subunit beta OS=Triticum aestivum OX=4565 PE=3 SV=1	78940.7	79524	85532.1	37851.9	36711.5	67789.5	67304.9	73002.1	69169.2	81332.3	47451	69825.4	3648.85	17622.9	2904.71	1.71403	1.16479	-1.47153
P10387	55	23	532.675	0.0322181	Glutenin high molecular weight subunit DY10 OS=Triticum aestivum OX=4565 GN=GLU-D1-2B PE=3 SV=1	668714	682113	687827	681183	720471	600919	529880	613118	553955	679551	667524	565651	9810.51	60935.2	42833.8	1.01802	1.20136	1.1801
P08488	48	17	494.069	0.0322181	Glutenin high molecular weight subunit 12 OS=Triticum aestivum OX=4565 PE=3 SV=1	362387	369648	372745	369144	390435	325648	287151	332259	300198	368260	361742	306536	5316.48	33021.8	23212.3	1.01802	1.20136	1.1801
A0A1D5YGW1	3	3	29.9842	0.0331028	Uncharacterized protein OS=Triticum aestivum OX=4565 PE=4 SV=1	19015.3	16774.6	17336.5	20680.8	22153.7	27738.1	22502.3	20913.1	21520.1	17708.8	23524.2	21645.2	1165.79	3722.89	801.908	-1.32839	-1.22228	1.08681
A0A1D5XAR1	7	2	60.6588	0.0367179	Uncharacterized protein OS=Triticum aestivum OX=4565 PE=4 SV=1	22463.4	14907	14883.7	26536.4	25243.2	29926.9	22990.6	18289.5	22713.7	17418	27235.5	21331.3	4369.42	2418.82	2637.86	-1.56364	-1.22467	1.27679
A0A1D6DLI7	34	12	329.26	0.0376119	Uncharacterized protein OS=Triticum aestivum OX=4565 PE=4 SV=1	346648	374863	456750	363989	559471	469176	661949	547590	618454	392754	464212	609331	57189.6	97835.9	57722.8	-1.18194	-1.55143	-1.31261
A0A1D5SCN9	8	8	68.9072	0.0389471	Glucose-1-phosphate adenylyltransferase OS=Triticum aestivum OX=4565 PE=3 SV=1	60081.3	62212.1	73009.9	62369.6	47267.4	49275.5	50186.5	47501.7	48406.6	65101.1	52970.9	48698.3	6931.61	8201.28	1365.96	1.229	1.33683	1.08774
P04721	31	1	337.636	0.0396732	Alpha/beta-gliadin A-I OS=Triticum aestivum OX=4565 PE=2 SV=1	13934.7	12519.4	16164.9	5536.64	11033	7474.45	12573.8	15666.5	25872	14206.3	8014.69	18037.4	1837.86	2787.71	6958.94	1.77254	-1.26968	-2.25055
B2Y2S6	56	19	624.594	0.0408129	Low molecular weight glutenin subunit OS=Triticum aestivum OX=4565 GN=GluB3-4 PE=4 SV=1	142615	164609	182441	186753	224526	172723	209066	225187	221259	163222	194668	218504	19949.5	26793.1	8406.12	-1.19266	-1.3387	-1.12245
A0A1D6DC72	8	8	104.27	0.0419018	Uncharacterized protein OS=Triticum aestivum OX=4565 PE=4 SV=1	104716	156953	170093	120596	135576	103347	90505.3	91354.5	83954.5	143921	119840	88604.8	34581.9	16127.7	4049.56	1.20094	1.6243	1.35252
A0A0K2QJY6	15	4	160.725	0.0423531	Alpha/beta-gliadin OS=Triticum aestivum OX=4565 PE=4 SV=1	135130	154178	158216	143723	152513	121980	171781	192664	168781	149175	139406	177742	12329.7	15717.5	13010	1.07008	-1.1915	-1.275
P06659	40	15	471.722	0.0463886	Gamma-gliadin B OS=Triticum aestivum OX=4565 PE=3 SV=1	237142	220567	264630	273342	393219	315112	244296	262831	245992	240780	327224	251040	22255.9	60849.3	10246.5	-1.35902	-1.04261	1.30348
A0A1D5TQ40	3	3	17.0826	0.0488492	Uncharacterized protein OS=Triticum aestivum OX=4565 PE=4 SV=1	6977.1	8188.95	8521.26	5826.47	4664.77	5513.35	4119.15	6825.29	5364.78	7895.77	5334.86	5436.41	812.759	601.069	1354.49	1.48003	1.45239	-1.01903
A0A1D6D8Z1	13	8	152.517	0.0490791	Uncharacterized protein OS=Triticum aestivum OX=4565 PE=4 SV=1	394872	450883	489831	452446	626463	541261	391487	405297	398929	445196	540057	398571	47734.4	87014.8	6911.95	-1.21308	1.11698	1.35498
P0CZ09	11	1	117.591	0.0490901	Avenin-like a5 OS=Triticum aestivum OX=4565 PE=3 SV=1	14216.8	17884.6	17143.5	16554.3	18053.6	16147.8	12040	14826.6	13154.6	16415	16918.6	13340.4	1939.39	1003.79	1402.55	-1.03068	1.23047	1.26822
A0A1D5YXN3	4	4	29.4453	0.0515058	Oleosin OS=Triticum aestivum OX=4565 PE=3 SV=1	23090.2	26837.2	28173.3	11765.3	17187.9	21234.8	21269.5	24191.1	24122.5	26033.6	16729.3	23194.4	2635.12	4751.35	1667.36	1.55616	1.12241	-1.38645
A0A1D5XGF3	49	10	553.913	0.0517207	Beta-amylase OS=Triticum aestivum OX=4565 PE=3 SV=1	220982	220087	190089	240826	218357	223400	202346	189456	189546	210386	227528	193783	17583.5	11789.5	7416.26	-1.08148	1.08568	1.17414
A0A1D5ST37	15	15	131.368	0.0573074	Malate dehydrogenase OS=Triticum aestivum OX=4565 PE=3 SV=1	61774.9	53541	52350.6	78896.1	62035.4	79482.7	73525.5	61250.5	70493.1	55888.8	73471.4	68423	5132.15	9908.22	6393.98	-1.3146	-1.22427	1.07378
P16315	35	9	357.063	0.0574365	Glutenin low molecular weight subunit PTDUCD1 OS=Triticum aestivum OX=4565 PE=2 SV=1	130637	165772	161526	177273	208090	149036	125476	134681	126951	152645	178133	129036	19177.3	29536.4	4943.98	-1.16698	1.18297	1.3805
Q05806	2	2	12.8163	0.0579044	Type-5 thionin OS=Triticum aestivum OX=4565 GN=TTHV PE=2 SV=1	78628.5	86539.5	94362.6	109148	132577	99407.7	84906.2	99853.8	80635.6	86510.2	113711	88465.2	7867.07	17049.1	10091.3	-1.31442	-1.0226	1.28537
A0A1D5S2A6	11	11	92.4739	0.0627674	Uncharacterized protein OS=Triticum aestivum OX=4565 PE=4 SV=1	60854.5	46849.1	48883.5	64443.9	62986	75403.7	75817.4	58923.5	68564.8	52195.7	67611.2	67768.6	7567.39	6787.75	8475.03	-1.29534	-1.29836	-1.00233
W5AMI8	12	1	126.441	0.0637769	Uncharacterized protein OS=Triticum aestivum OX=4565 PE=4 SV=1	57824.2	52600.7	45247.1	70088	58723.6	59826.7	61690.9	62194.5	64799.9	51890.7	62879.4	62895.1	6318.54	6267.14	1668.73	-1.21177	-1.21207	-1.00025
W5AB71	13	2	137.675	0.0637769	Uncharacterized protein OS=Triticum aestivum OX=4565 PE=4 SV=1	117716	107083	92112.4	142683	119547	121793	125588	126613	131917	105637	128008	128040	12863.1	12758.4	3397.15	-1.21177	-1.21207	-1.00025
A0A1D5WWL8	21	11	255.384	0.0663584	Uncharacterized protein OS=Triticum aestivum OX=4565 PE=4 SV=1	346544	395188	404082	454580	460095	384371	366439	365037	345496	381938	433015	358991	30973.2	42216.9	11708	-1.13373	1.06392	1.2062
A0A1D6AIQ8	42	4	483.656	0.0692896	Uncharacterized protein OS=Triticum aestivum OX=4565 PE=4 SV=1	40505	28412.8	26438.6	44899.1	43875.7	36549	45493.2	42921.8	41696.8	31785.5	41774.6	43370.6	7615.58	4554.31	1937.55	-1.31427	-1.36448	-1.03821
Q8W3V5	42	15	411.465	0.0718058	LMW-glutenin P3-42 OS=Triticum aestivum OX=4565 GN=lmw-gs PE=2 SV=1	94542.8	113962	131053	149952	162015	131265	131526	150933	134741	113186	147744	139066	18267.7	15493.2	10401.7	-1.30532	-1.22865	1.0624
A0A096UL77	2	2	24.633	0.0734494	Uncharacterized protein OS=Triticum aestivum OX=4565 PE=3 SV=1	109218	118584	135210	124954	131700	140082	110070	110739	114294	121004	132246	111701	13163.6	7578.69	2270.17	-1.0929	1.08329	1.18393
Q41593	33	5	339.105	0.0826891	Serpin-Z1A OS=Triticum aestivum OX=4565 GN=WZCI PE=1 SV=1	162967	101996	100998	151189	145952	164418	217153	153847	182318	121987	153853	184439	35493.4	9516.42	31706.2	-1.26122	-1.51195	-1.1988
A0A1D5RYM7	3	3	22.966	0.0861879	Uncharacterized protein OS=Triticum aestivum OX=4565 PE=4 SV=1	47021	54972.6	56478.7	51024.3	50109.2	57189.4	34999.7	45571	46576.1	52824.1	52774.3	42382.3	5081.7	3850.85	6413.21	1.00094	1.24637	1.2452
W5G5H3	11	1	106.015	0.0895183	Glyceraldehyde-3-phosphate dehydrogenase OS=Triticum aestivum OX=4565 GN=4329892 (1 of many) PE=3 SV=1	17991.5	12148.2	8868.96	24753.6	17078.9	24097.6	17849.4	14405.8	18366.8	13002.9	21976.7	16874	4620.91	4254.29	2153.13	-1.69014	-1.29771	1.3024
D6QZM5	23	1	228.393	0.0895813	Avenin-like b8 OS=Triticum aestivum OX=4565 PE=3 SV=1	12571.6	10765.2	10353.9	11023.1	9414.32	10107.6	9862.17	8981.88	9311.45	11230.2	10181.7	9385.17	1179.73	806.947	444.752	1.10298	1.19659	1.08487
P02861	13	11	121.203	0.0962173	Glutenin high molecular weight subunit PC256 (Fragment) OS=Triticum aestivum OX=4565 PE=2 SV=1	104045	131994	146739	107272	94612.6	73544.4	95330.1	107433	103065	127593	91809.8	101943	21684.6	17037.7	6128.94	1.38975	1.25161	-1.11037
P04730	54	3	601.107	0.110508	Gamma-gliadin (Fragment) OS=Triticum aestivum OX=4565 PE=2 SV=1	82371.6	85649.6	91386.4	109868	123538	96121.6	87277.8	115793	97742.6	86469.2	109842	100271	4562.96	13708	14424.9	-1.2703	-1.15962	1.09545
A0A1D5VIX2	2	2	23.1224	0.116424	Uncharacterized protein OS=Triticum aestivum OX=4565 GN=4325211 (1 of many) PE=3 SV=1	39565.3	43025.9	42977.3	56587	40904.3	48135.9	40679.8	37882.5	39774.8	41856.2	48542.4	39445.7	1984.08	7849.26	1427.37	-1.15974	1.06111	1.23061
A0A1D6AVF5	10	7	73.0968	0.116782	Uncharacterized protein OS=Triticum aestivum OX=4565 PE=4 SV=1	195650	188107	221758	239611	266928	175704	249050	282199	271429	201838	227414	267559	17658.6	46818.8	16909.9	-1.12672	-1.32561	-1.17653
Q9ST58	35	12	357.13	0.119036	Serpin-Z1C OS=Triticum aestivum OX=4565 PE=1 SV=1	221839	165685	153644	217835	183282	204387	268273	212858	231872	180389	201834	237667	36397.7	17417.4	28158.8	-1.11888	-1.31753	-1.17754
A0A1D5XC33	2	2	23.8728	0.146848	Uncharacterized protein OS=Triticum aestivum OX=4565 PE=4 SV=1	108587	127488	131205	128335	130368	109373	138618	152159	134256	122426	122692	141678	12128.4	11579.2	9335.19	-1.00217	-1.15725	-1.15474
P04725	36	2	431.277	0.15173	Alpha/beta-gliadin A-V OS=Triticum aestivum OX=4565 PE=2 SV=1	2083.94	1759.62	1758.14	1498.2	2687.8	1535.54	2602.56	2418.04	2665.74	1867.23	1907.18	2562.11	187.676	676.294	128.706	-1.02139	-1.37214	-1.3434
A0A1D5YTD0	2	2	17.3816	0.153157	Uncharacterized protein OS=Triticum aestivum OX=4565 PE=4 SV=1	26430	24640	22924.9	36948.8	26104.5	29741.4	29219.9	25605.9	28803.8	24665	30931.6	27876.5	1752.7	5519.26	1977.38	-1.25407	-1.13021	1.10959
P16159	20	5	182.618	0.171175	Alpha-amylase/trypsin inhibitor CM16 OS=Triticum aestivum OX=4565 PE=1 SV=1	323462	398431	399816	193581	328334	309413	310102	300811	299833	373903	277109	303582	43688.8	72954.1	5667.56	1.3493	1.23164	-1.09553
A0A1D5VE13	8	8	75.5589	0.183346	Fructose-bisphosphate aldolase OS=Triticum aestivum OX=4565 PE=3 SV=1	115646	104088	115049	130436	119492	120306	126975	111199	118793	111594	123411	118989	6507.46	6096.97	7889.74	-1.10589	-1.06626	1.03716
P04722	55	24	581.511	0.199759	Alpha/beta-gliadin A-II OS=Triticum aestivum OX=4565 PE=2 SV=1	426847	492683	518351	454436	570081	414804	562455	579576	543460	479294	479774	561830	47199	80679.7	18066.1	-1.001	-1.1722	-1.17103
Q94G92	36	11	427.127	0.204259	Gamma-gliadin OS=Triticum aestivum OX=4565 PE=2 SV=1	96716.7	143424	127034	98166.4	105481	84174.7	106426	127992	108702	122392	95940.7	114373	23697.3	10826.2	11848.7	1.2757	1.07011	-1.19212
L0GED8	3	3	24.9668	0.219695	14-3-3 protein OS=Triticum aestivum OX=4565 GN=14R2 PE=2 SV=1	21304	22666	22917	7469.29	16006.3	21450	19054.1	20302.7	20877.4	22295.7	14975.2	20078	867.91	7047.16	932.18	1.48884	1.11045	-1.34075
A0A1D5XDB6	17	5	167.606	0.229186	Elongation factor 1-alpha OS=Triticum aestivum OX=4565 PE=3 SV=1	310848	314238	376984	392142	390871	322605	307733	330014	316547	334023	368539	318098	37243.6	39785.2	11221.2	-1.10333	1.05006	1.15857
P08079	28	4	289.174	0.232043	Gamma-gliadin (Fragment) OS=Triticum aestivum OX=4565 PE=1 SV=1	51707	91360.2	64234.2	57656	44671	41116.8	47023.7	66585.3	46860.2	69100.5	47814.6	53489.8	20269.6	8706.18	11341.4	1.44517	1.29184	-1.11869
I0IT65	29	8	364.072	0.236647	Alpha-gliadin OS=Triticum aestivum OX=4565 GN=gli-2 PE=4 SV=1	265570	301985	331858	220991	345635	284662	342208	361575	343292	299804	283763	349025	33197.5	62326.8	10882.4	1.05653	-1.16418	-1.22999
A0A1D6BV11	10	10	99.6021	0.24316	Glucose-1-phosphate adenylyltransferase OS=Triticum aestivum OX=4565 GN=Agp1 PE=2 SV=1	70680.4	65129.7	63041.9	68332.4	65182.5	76761.3	66430.1	56685.5	63754.3	66284	70092	62290	3947.9	5986.61	5034.61	-1.05745	1.06412	1.12525
A0A1D5X6G4	32	9	412.43	0.259372	Uncharacterized protein OS=Triticum aestivum OX=4565 PE=4 SV=1	789174	567108	502119	904454	689697	854904	894419	602089	755139	619467	816352	750549	150520	112450	146219	-1.31783	-1.2116	1.08767
P04728	35	7	385.8	0.265168	Alpha/beta-gliadin clone PTO-A10 (Fragment) OS=Triticum aestivum OX=4565 PE=2 SV=1	163737	183703	210916	239927	229128	187072	195068	228551	212031	186119	218709	211883	23682.2	27925.5	16741.8	-1.1751	-1.13843	1.03221
A0A1D5SC67	2	2	23.6052	0.35268	Uncharacterized protein OS=Triticum aestivum OX=4565 PE=4 SV=1	63924.1	72759.4	72844.5	41961.8	61000	91500.4	82202.6	81236.6	84892	69842.7	64820.7	82777.1	5125.84	24989.3	1894.18	1.07747	-1.18519	-1.27701
D2KFH1	15	8	130.938	0.36751	Avenin-like a4 OS=Triticum aestivum OX=4565 PE=2 SV=1	70067.9	89521.5	87212.1	72316.4	95190.3	74184.4	90173.9	96201.9	89595.6	82267.2	80563.7	91990.5	10627.8	12701.4	3658.65	1.02114	-1.11819	-1.14184
A0A1D5ZG58	8	8	79.5089	0.401366	Uncharacterized protein OS=Triticum aestivum OX=4565 PE=3 SV=1	51475.3	39532.7	41321	49167.7	40199.8	50935.7	56818.8	46774.6	49257.2	44109.7	46767.7	50950.2	6441.16	5756.29	5231.76	-1.06026	-1.15508	-1.08943
A0A1D5Z199	41	1	455.616	0.413041	Uncharacterized protein OS=Triticum aestivum OX=4565 PE=4 SV=1	4816.34	3131.35	3311.51	247.926	8520.7	8275.43	948.317	893.986	1070.9	3753.06	5681.35	971.066	925.22	4707.08	90.6222	-1.51379	3.86489	5.85064
A0A1D5YFA6	59	11	637.963	0.417267	Beta-amylase OS=Triticum aestivum OX=4565 PE=3 SV=1	611746	598902	572959	661530	625727	566296	569274	598610	575242	594536	617851	581042	19758.9	48103.4	15504.1	-1.03922	1.02322	1.06335
A0A1D6REH6	6	3	53.8635	0.458116	Uncharacterized protein OS=Triticum aestivum OX=4565 PE=4 SV=1	32841.1	32686.4	35846.9	35073.5	25053.4	31093.4	31547.7	30103.7	32744.2	33791.4	30406.7	31465.2	1781.74	5045.2	1322.19	1.11131	1.07393	-1.03481
A0A1D5XVS4	6	2	60.4094	0.460445	Uncharacterized protein OS=Triticum aestivum OX=4565 PE=4 SV=1	19425.1	14113.2	15409.2	17578.4	11754.9	22516.4	14945.4	11971.4	13336.7	16315.9	17283.2	13417.8	2769.57	5386.85	1488.67	-1.05929	1.21598	1.28808
A0A1D5ZTV0	16	6	158.692	0.4752	Serpin-N3.2 OS=Triticum aestivum OX=4565 PE=3 SV=1	97218	76397.7	76756.1	104369	80568.2	96150.1	92938.2	77954.3	80503.6	83457.3	93695.8	83798.7	11918.5	12088.8	8017.03	-1.12268	-1.00409	1.11811
A0A1D5X7C3	18	1	188.647	0.476347	Protein disulfide-isomerase OS=Triticum aestivum OX=4565 GN=4350002 (1 of many) PE=3 SV=1	57064.1	54458.7	50180.8	60268.9	51756.9	58388.1	68003.4	52625	58965.1	53901.2	56804.6	59864.5	3475.33	4471.51	7728.55	-1.05387	-1.11063	-1.05387
P08453	32	3	406.51	0.482221	Gamma-gliadin OS=Triticum aestivum OX=4565 PE=3 SV=1	39596.8	66438.6	67990.4	49571.7	56029	47379	46985	48524.4	43687.3	58008.6	50993.3	46398.9	15963.9	4496.82	2471.25	1.13757	1.25021	1.09902
A0A1D5YEH0	40	24	427.765	0.516506	Uncharacterized protein OS=Triticum aestivum OX=4565 PE=4 SV=1	259530	222192	209625	295626	228847	246458	264887	227912	241421	230449	256977	244740	25957.2	34609.7	18709.6	-1.11511	-1.06201	1.05
A0A1D6AJC3	40	1	460.935	0.519964	Uncharacterized protein OS=Triticum aestivum OX=4565 PE=4 SV=1	9813.89	10135.9	10743.7	12402.9	11104.7	7366.64	10924.6	12466.3	11649.7	10231.2	10291.4	11680.2	472.172	2614.78	771.277	-1.00589	-1.14163	-1.13495
A0A1D5W2N3	3	3	18.2147	0.558027	Uncharacterized protein OS=Triticum aestivum OX=4565 PE=3 SV=1	23258.2	16211.8	16423.9	21132.8	18191.9	18200.8	20681.1	18557.7	24205.6	18631.3	19175.2	21148.1	4008.41	1695.38	2852.73	-1.02919	-1.13509	-1.10289
W5AKY9	46	13	470.471	0.560617	Uncharacterized protein OS=Triticum aestivum OX=4565 PE=4 SV=1	132320	105976	108067	128253	86602.1	91087.9	122409	103751	107026	115454	101981	111062	14643.9	22862.7	9962.41	1.13211	1.03955	-1.08905
A0A1D5RUP2	2	2	26.5824	0.568627	Nucleoside diphosphate kinase OS=Triticum aestivum OX=4565 PE=3 SV=1	60281.5	62168.4	61040.5	65124.3	48035.2	59827.4	58576.2	54097.9	56844.7	61163.5	57662.3	56506.3	949.42	8747.87	2258.25	1.06072	1.08242	1.02046
A0A1D5T3T7	15	14	117.454	0.572967	Uncharacterized protein OS=Triticum aestivum OX=4565 PE=4 SV=1	112033	110473	123963	147784	139120	99257.4	121232	133438	132174	115490	128721	128948	7379.82	25881	6712.34	-1.11456	-1.11653	-1.00177
M9TGF7	41	9	503.898	0.582091	Gamma-gliadin 2 OS=Triticum aestivum OX=4565 PE=2 SV=1	848820	984202	1.11979e+06	1.04128e+06	1.25189e+06	989223	923465	1.12048e+06	1.02954e+06	984272	1.09413e+06	1.0245e+06	135486	139082	98604.2	-1.11161	-1.04087	1.06797
A0A1D5ZZT8	38	5	445.742	0.586801	Uncharacterized protein OS=Triticum aestivum OX=4565 PE=4 SV=1	169892	139206	140369	206460	140401	163290	172731	149324	162769	149822	170050	161608	17390.4	33544.2	11746.6	-1.13501	-1.07866	1.05224
A0A1D5Y681	21	4	223.215	0.608326	Protein disulfide-isomerase OS=Triticum aestivum OX=4565 GN=4350002 (1 of many) PE=3 SV=1	188279	172429	165136	210687	169396	192314	222277	171471	178178	175281	190799	190642	11832.4	20686.9	27601.1	-1.08853	-1.08763	1.00082
P10388	62	14	646.498	0.62268	Glutenin high molecular weight subunit DX5 OS=Triticum aestivum OX=4565 GN=GLU-1D-1D PE=3 SV=5	638011	578425	554037	650341	664533	556469	597560	580296	603410	590158	623781	593755	43199.3	58724.2	12017.4	-1.05697	-1.0061	1.05057
Q00M61	58	42	617.565	0.68963	LMW-GS OS=Triticum aestivum OX=4565 GN=GluD3-1 PE=2 SV=1	378239	452902	453417	447393	496766	400432	367563	464233	410944	428186	448197	414247	43256.1	48172.3	48419.8	-1.04673	1.03365	1.08196
P16851	15	10	185.715	0.693472	Alpha-amylase/trypsin inhibitor CM2 OS=Triticum aestivum OX=4565 PE=1 SV=2	372084	432808	506498	292131	501533	452797	378659	373804	383587	437130	415487	378683	67311	109573	4891.11	1.05209	1.15434	1.09719
Q2A784	12	3	110.681	0.699451	Avenin-like a1 OS=Triticum aestivum OX=4565 GN=AVNLA PE=2 SV=1	79787.7	77310.3	95300.3	100959	105841	66767.8	90063.2	91520.4	101202	84132.7	91189.2	94261.9	9750.38	21290	6054.31	-1.08387	-1.12039	-1.0337
A0A1D5XG58	7	3	67.995	0.737399	Uncharacterized protein OS=Triticum aestivum OX=4565 PE=4 SV=1	32440.8	26817.5	27563.5	26684.2	20095.5	35384.6	26726.2	24519.6	26147	28940.6	27388.1	25797.6	3054.1	7668.77	1144.06	1.05669	1.12183	1.06165
P33432	11	11	106.828	0.741834	Puroindoline-A OS=Triticum aestivum OX=4565 GN=PINA PE=1 SV=2	209270	222492	246739	129070	248906	245234	230956	219737	224700	226167	207736	225131	19002.9	68152.2	5622.26	1.08872	1.0046	-1.08373
P17314	15	9	158.429	0.843557	Alpha-amylase/trypsin inhibitor CM3 OS=Triticum aestivum OX=4565 PE=1 SV=1	193465	207212	233020	253813	280445	88546.7	227538	205107	227213	211232	207602	219953	20081.6	103961	12857.8	1.01749	-1.04128	-1.05949
A0A077RWR2	2	2	18.6557	0.856777	Uncharacterized protein OS=Triticum aestivum OX=4565 GN=TRAES_3BF066700050CFD_c1 PE=3 SV=1	111627	100462	101535	119919	92371.5	103747	106250	94373.4	102513	104542	105346	101045	6159.66	13843.2	6072.73	-1.00769	1.0346	1.04256
A0A1D5W815	3	1	27.6435	0.877004	Uncharacterized protein OS=Triticum aestivum OX=4565 PE=3 SV=1	32767.1	28411.7	29096.3	36961	28018.2	27271.2	29884.8	28488.1	29028.3	30091.7	30750.1	29133.8	2342.11	5391.71	704.287	-1.02188	1.03288	1.05548
Q8W3V4	42	27	439.488	0.885325	LMW-glutenin P3-6 OS=Triticum aestivum OX=4565 GN=lmw-gs PE=4 SV=1	169112	189671	159217	170200	202714	164806	170055	187387	170467	172667	179240	175970	15535	20506.9	9889.95	-1.03807	-1.01913	1.01858
W5I5X1	14	6	144.302	0.907167	Uncharacterized protein OS=Triticum aestivum OX=4565 PE=3 SV=1	116921	91694.3	76912.6	109732	79443.7	100580	102813	80943	87795.9	95176	96585.2	90517.3	20230.2	15534.4	11186.1	-1.01481	1.05147	1.06704
A0A1D5Y5R2	36	12	412.829	0.941612	Uncharacterized protein OS=Triticum aestivum OX=4565 PE=4 SV=1	298240	274800	244539	354716	219168	258472	276360	254867	254058	272527	277452	261762	26922.6	69739.1	12649	-1.01807	1.04113	1.05994
A0A1D5SU51	7	4	54.6243	0.941739	Uncharacterized protein OS=Triticum aestivum OX=4565 PE=4 SV=1	22108.7	21146.9	21905	26608.2	16149.1	21194.2	21451	19573.9	22035.2	21720.2	21317.2	21020.1	506.857	5230.67	1286	1.01891	1.03331	1.01413
A0A1D6BRN0	14	9	135.411	0.966499	Glyceraldehyde-3-phosphate dehydrogenase OS=Triticum aestivum OX=4565 GN=4344564 (1 of many) PE=3 SV=1	119230	96203.1	91453.8	104973	90535.5	103735	103913	95652.8	101722	102296	99747.7	100429	14856.8	8001.95	4278.96	1.02554	1.01859	-1.00683
W5FZ62	35	5	371.714	0.971392	Uncharacterized protein OS=Triticum aestivum OX=4565 PE=3 SV=1	298967	257490	248264	301026	224856	266080	277845	262982	257668	268240	263987	266165	27006.6	38128	10457.9	1.01611	1.0078	-1.00825

## Sheet: Table S4
Table S4. Peptide identification details for direct liquid chromatography-mass spectrometry quantification.
Peptide identifier	Retention time (min)	Neutral mass	Score	Sequence	Modifications	Accession	Normalized abundance
							Pan1	Pan2	Pan3	Sot1	Sot2	Sot3	Ukr1	Ukr2	Ukr3
42.27_1405.7430n	42.2695	1405.74	8.1708	LQPHQIAQLEVM		P10386	2.16894e+06	2.73266e+06	2.56282e+06	1.81717e+06	1.87897e+06	1.52961e+06	1.91462e+06	2.46901e+06	2.1304e+06
32.27_1132.5728n	32.2657	1132.57	8.1114	QQLNPCKVF	[6] Carbamidomethyl C	P10386	2.33009e+06	2.5599e+06	2.41417e+06	2.05593e+06	2.56283e+06	1.67732e+06	2.51525e+06	2.7907e+06	2.43589e+06
27.29_1046.5906n	27.2945	1046.59	8.0785	LQPHQIAQL		P10386	656129	810106	830419	33091.7	445046	478151	473739	579018	509654
26.72_1046.5889n	26.7166	1046.59	7.5355	LQPHQIAQL		P10386	0	0	0	16690.9	0	0	0	0	0
26.75_1046.5933n	26.7504	1046.59	7.5355	LQPHQIAQL		P10386	1622.56	565.286	683.04	57068.2	1135.47	859.429	1958.21	820.58	887.759
13.49_1053.5231n	13.4941	1053.52	8.6186	GQQPQQQQL		P10386	575672	816234	871976	253019	467622	504155	460303	639447	559563
32.62_1421.7357n	32.6236	1421.74	8.2535	LQPHQIAQLEVM	[12] Oxidation M	P10386	965228	1.02773e+06	1.12579e+06	541977	496526	465618	558477	730839	633295
18.62_717.3849n	18.6204	717.385	8.0102	RTLPTM		B2Y2Q6	271789	379820	453570	90614.6	238928	289498	243634	306121	290530
34.42_1133.5594n	34.4214	1133.56	8.0881	QQLNPCKVF	[1] Deamidation Q|[6] Carbamidomethyl C	P10386	468293	540888	636837	523754	556412	475546	583443	556891	526429
34.42_1133.5553n	34.4214	1133.56	8.0881	QQLNPCKVF	[1] Deamidation Q|[6] Carbamidomethyl C	P10386	33562.7	21958.6	26016.6	20491.1	59615.6	18573.3	46032.6	42440.9	41330.4
44.50_1406.7221n	44.5043	1406.72	7.6316	LQPHQIAQLEVM	[8] Deamidation Q	P10386	509408	608308	671258	543594	642162	497511	455784	532726	482552
44.91_1406.7225n	44.91	1406.72	7.6316	LQPHQIAQLEVM	[8] Deamidation Q	P10386	1204.41	606.646	836.832	0	71.9658	0	949.092	1342.57	1047.05
44.40_1406.7235n	44.4029	1406.72	7.4863	LQPHQIAQLEVM	[2] Deamidation Q	P10386	2253.41	393.86	1007.34	341.884	3458.76	1272.57	3814.51	3347.54	3465.1
13.09_1091.4527n	13.0884	1091.45	7.7683	QQQCCQQL	[4] Carbamidomethyl C|[5] Carbamidomethyl C	Q00M56	103985	139304	155274	286341	296435	251607	157080	187111	169480
38.46_1186.5871n	38.4624	1186.59	8.0511	LQQQCIPVAM	[5] Carbamidomethyl C	Q6SPZ3	510270	577690	608966	131163	94977.5	90826.1	562976	710571	620894
24.46_1114.5271n	24.4593	1114.53	7.1794	LQQSICHVM	[6] Carbamidomethyl C	Q6SPZ3	328331	384559	400671	146964	114753	124997	335426	366176	327289
24.46_1114.5251n	24.4593	1114.53	7.1794	LQQSICHVM	[6] Carbamidomethyl C	Q6SPZ3	5990.64	4681.41	5070.95	0	0	0	2694.9	3354.56	2698.89
46.37_862.4450n	46.3698	862.445	7.364	EVMTSIAL		P10386	86000.5	96589.6	72100.9	87147.5	97035.2	68627.9	100001	128314	101960
41.86_819.4482n	41.8552	819.448	6.7053	GVGIGVGVY		Q6SPZ3	64099.3	70072.4	61768.3	2026.89	1927.9	1426.84	133580	146573	124851
14.50_1054.5081n	14.4976	1054.51	8.2085	GQQPQQQQL	[5] Deamidation Q	P10386	320513	428633	542829	238613	316705	319142	265432	317325	280434
14.63_1054.5055n	14.6328	1054.51	8.2085	GQQPQQQQL	[5] Deamidation Q	P10386	59710.5	90106.1	125752	59433.1	63819.6	47256.8	50574.6	71842.7	66036.1
13.82_996.4983n	13.8182	996.498	6.8815	QQQQPQQL		Q6SPZ3	81305	101797	113236	21516.2	100246	86323.8	81866.3	99677.8	92427.2
11.92_996.4987n	11.9161	996.499	6.1114	QQQQPQQL		Q6SPZ3	165.62	289.362	365.66	550.349	264.081	366.17	776.562	1431.72	1197.23
34.02_1422.6970n	34.0156	1422.7	7.5834	LQPHQIAQLEVM	[8] Deamidation Q|[12] Oxidation M	P10386	238171	300813	321145	216341	201811	180142	242597	304705	266096
46.17_1486.7604n	46.1669	1486.76	7.2504	RTLPTMCSVNVPL	[7] Carbamidomethyl C	Q6SPZ3	139966	118970	120000	131764	203199	129399	162002	154948	147548
46.47_1486.7641n	46.4712	1486.76	7.2504	RTLPTMCSVNVPL	[7] Carbamidomethyl C	Q6SPZ3	507.059	25.7184	331.52	0	0	0	0	0	0
58.01_1778.8773n	58.014	1778.88	7.6894	CSVNVPLYETTTSVPL	[1] Carbamidomethyl C	Q6SPZ3	100816	110919	109989	36713.2	23547.3	8405.05	86972.4	110252	99074.1
34.61_787.3873n	34.6073	787.387	7.1333	CSVNVPL	[1] Carbamidomethyl C	P10386	36363.3	41918.4	38512.2	30611.3	40803.2	30991	26850.6	39342.2	31088.6
14.31_1092.4395n	14.3085	1092.44	7.2298	QQQCCQEL	[4] Carbamidomethyl C|[5] Carbamidomethyl C	A0A1D6REQ9	98565.7	146933	178296	78698.5	182359	141404	95887.5	137529	120310
45.08_2770.3998n	45.0791	2770.4	7.8841	SIILQQQQQQQQQQQQGQSIIQY		Q6SPZ3	425379	323116	444728	26114.2	7206.06	6149.18	552975	624235	645653
48.96_1649.8209n	48.9625	1649.82	7.1813	RTLPTMCSVNVPLY	[7] Carbamidomethyl C	Q6SPZ3	117513	113953	136698	124399	198628	126311	149786	129170	122667
44.40_1572.8519n	44.4029	1572.85	7.763	SQQQQIPVIHPSVL		Q6SPZ3	117855	165907	159953	7557.49	14648.2	20677.4	81935.2	145040	103306
24.68_2095.1230n	24.679	2095.12	7.128	RQIPEQSRHESIRAIIY		Q6SPZ3	237646	199560	253999	85941.5	53484.2	70933.7	363925	299170	285958
22.34_958.4518n	22.3374	958.452	7.7344	SQQQQPPF		B2Y2Q6	57483.1	69772.7	83719.2	35811.9	4481.11	5326.07	18743.3	31783.3	26546.7
31.40_1768.8568n	31.4006	1768.86	7.4866	GQCVSQPQQQLQQQL	[3] Carbamidomethyl C	Q6SPZ3	108522	131246	126499	11808.8	6677.56	4374.54	79519.1	123395	98733
57.88_4104.0768n	57.8787	4104.08	7.3424	SQQPPISQQQQPPFSQQQQPPFSQQQQIPVIHPSVL		Q6SPZ3	97454	123256	136626	8177.77	4674.86	2660.05	82864.3	113844	108251
26.78_2408.1509n	26.7842	2408.15	7.7174	SQQPPISQQQQQQQQQQQPF		Q6SPZ3	68016.7	121476	119280	4252.38	3612.24	5322.49	62202.6	99219.3	81200
26.85_2408.1488n	26.8518	2408.15	7.7174	SQQPPISQQQQQQQQQQQPF		Q6SPZ3	30762.9	31094.3	28663.4	463.551	39.2142	0	21713.9	36521.5	30804.8
18.91_985.4935n	18.9078	985.494	6.0876	LQQQQPPF	[2] Deamidation Q	Q6SPZ3	72507.2	79478.8	92638.6	56087.4	70526.6	73403.7	59456.9	68866.5	63819.2
24.85_1202.5808n	24.8481	1202.58	7.979	LQQQCIPVAM	[5] Carbamidomethyl C|[10] Oxidation M	Q6SPZ3	104917	101075	112515	55677.3	45330	49814.6	70832.1	81005.6	71605.3
52.75_2513.2975n	52.7527	2513.3	7.8178	SQQQQPPFSQQQQIPVIHPSVL		Q6SPZ3	106425	151458	141491	24851.7	19962.8	14192.2	88063	130276	104168
52.94_2513.2744n	52.9387	2513.27	7.8178	SQQQQPPFSQQQQIPVIHPSVL		Q6SPZ3	521.577	494.568	635.041	1885.13	2608.96	2031.8	399.872	339.116	376.78
45.81_763.3686n	45.809	763.369	7.9986	NPCKVF	[3] Carbamidomethyl C	P10386	35447.8	41936.4	51885.9	35159.2	32440.1	29122.2	33596.6	41605.2	34915.5
45.47_763.3719n	45.4709	763.372	7.9986	NPCKVF	[3] Carbamidomethyl C	P10386	47074.7	49347.7	43793.8	61147.5	51701	54399.3	66781.4	68571.7	60838
18.91_1271.5943n	18.9078	1271.59	7.7276	GQCVSQPQQQL	[3] Carbamidomethyl C	Q6SPZ3	76412.4	99070.8	116650	26670.1	23295.4	28888.2	47074.6	77441.2	59402.3
39.83_950.4541n	39.8347	950.454	7.3209	CSVNVPLY	[1] Carbamidomethyl C	P10386	14490.1	15613.8	15907.7	12442.8	18508.5	9084.02	13387.8	17674.1	16423
33.49_1009.4976n	33.4887	1009.5	6.8766	YETTTSVPL		Q6SPZ3	22250.5	18518.8	13575	38.3149	0	0	11112.4	17191.1	14543.1
27.16_846.4335n	27.1564	846.433	5.9333	ETTTSVPL		Q6SPZ3	24811.4	19236.4	21341.9	31.0275	794.954	1063.48	10060.5	14333.6	11997
21.54_1550.7759n	21.5399	1550.78	7.2302	QQQLGQQPQQQQL		Q6SPZ3	48274.5	51211.7	59832.7	30918.1	8242.19	8487.16	36705.4	45914.3	43059.4
75.24_1550.7736n	75.2407	1550.77	6.2328	QQQLGQQPQQQQL		Q6SPZ3	1923.2	1963.21	1919.91	997.191	1058.51	553.313	5153.37	3567.5	4083.7
69.96_972.4705n	69.9624	972.47	6.6917	TQQQQPPF		Q6SPZ3	11405.3	12253.9	11951.5	12196.6	16572.9	12425.4	15566.3	16856.2	16683.9
22.80_972.4669n	22.7967	972.467	6.2033	TQQQQPPF		Q6SPZ3	10851.9	14660.1	16398.1	7795.84	189.988	159.608	4411.91	7635.47	6031.08
37.90_1888.8791n	37.9016	1888.88	7.246	SQQQQPPFSQQQQSPF		Q6SPZ3	37353.9	40536.3	36741.8	9891.38	9911.47	6298.92	24741.8	39952.5	30034
31.57_1680.8267n	31.5697	1680.83	6.827	GQQPQQQQLAHGTFL	[8] Deamidation Q	Q6SPZ3	22902.4	32013.3	34728.4	26375.6	25983.9	24937.4	23449	22412.3	21029.5
50.38_2053.0018n	50.377	2053	7.241	SQQQQQPPFLQQQQPPF		Q6SPZ3	75777.5	109108	104582	47660.2	44554.5	36743.1	68852.5	100535	80007.2
50.38_2053.0011n	50.377	2053	7.241	SQQQQQPPFLQQQQPPF		Q6SPZ3	24811.7	26007.5	14330.1	2310.06	1623.71	1416.92	19659.1	32311.3	26854.6
40.79_1187.5716n	40.7872	1187.57	6.9323	LQQQCIPVAM	[3] Deamidation Q|[5] Carbamidomethyl C	Q6SPZ3	55421.4	54208.9	57726.6	32244.5	30251.4	32202.3	61694.7	62037.3	62803.2
39.67_1187.5686n	39.6656	1187.57	7.2887	LQQQCIPVAM	[3] Deamidation Q|[5] Carbamidomethyl C	Q6SPZ3	4608.55	2416.23	3093.85	212.974	0	0	6177.36	6981.75	6804.16
22.41_1086.5094n	22.405	1086.51	6.9908	SQQQQQPPF		Q6SPZ3	2029.27	2214.84	2769.64	170.699	0	0	489.46	1248.11	971.172
34.22_1086.5222n	34.2185	1086.52	5.9123	SQQQQQPPF		Q6SPZ3	6253.23	4489.91	3591.23	35078.4	28616.4	25940.5	3342.44	3776.97	4354.71
39.26_1272.5756n	39.2599	1272.58	6.1176	GQCVSQPQQQL	[3] Carbamidomethyl C|[8] Deamidation Q	Q6SPZ3	13049.1	13340.2	12600.7	15507.1	40208.8	45335.7	49816	38427.7	38199.5
28.24_2409.1298n	28.2441	2409.13	6.6597	SQQPPISQQQQQQQQQQQPF	[12] Deamidation Q	Q6SPZ3	51665	76456.5	94415	11454.5	8123.15	6376.31	50312.3	69045.2	60821.3
28.31_2409.1296n	28.3118	2409.13	6.6597	SQQPPISQQQQQQQQQQQPF	[12] Deamidation Q	Q6SPZ3	13629.3	13994.6	17141.3	0	0	0	10277.6	15756.4	13817.6
30.81_2250.0786n	30.806	2250.08	7.1388	QQQQPQQLGQCVSQPQQQL	[11] Carbamidomethyl C	Q6SPZ3	7960.38	4068.7	4461.02	0	79.5255	0	5670.84	9871.15	8178.04
30.93_2250.0779n	30.9273	2250.08	7.1388	QQQQPQQLGQCVSQPQQQL	[11] Carbamidomethyl C	Q6SPZ3	24961	24169.3	23599.9	12245.3	9777.49	7138.84	22408.8	26420.2	24940.9
58.64_4105.0580n	58.6424	4105.06	6.8009	SQQPPISQQQQPPFSQQQQPPFSQQQQIPVIHPSVL	[24] Deamidation Q	Q6SPZ3	45768.2	55419.3	72359.4	11924.1	6088.25	2156.08	52706.9	59502.3	63708
57.84_4105.0651n	57.8449	4105.07	6.1507	SQQPPISQQQQPPFSQQQQPPFSQQQQIPVIHPSVL	[2] Deamidation Q	Q6SPZ3	147.208	465.986	650.164	10.9718	12.1313	30.7016	220.039	528.176	413.515
29.69_2344.1124n	29.6871	2344.11	7.2935	QQQQQQQQQQQQGQSIIQY		Q6SPZ3	35847.8	40960.4	39285.8	3559.83	3088.05	2266.44	18014.1	36691.7	28279.6
45.78_2771.3843n	45.7752	2771.38	7.6376	SIILQQQQQQQQQQQQGQSIIQY	[8] Deamidation Q	Q6SPZ3	22916	8869.05	12422.7	32.3662	0	0	43355.7	40312.5	45805.3
24.56_1944.9151n	24.5607	1944.92	5.8422	QQQQQPPFTQQQQPSF	[13] Deamidation Q	Q6SPZ3	8079.42	9760.58	11874.8	12213.8	6037.69	8713.59	7196.73	9130.8	7370.25
17.13_2842.2887n	17.1266	2842.29	5.8378	SQQQQPPFSQQQQPPFSQQQQPPF	[2] Deamidation Q|[3] Deamidation Q|[18] Deamidation Q	Q6SPZ3	119.54	80.8058	121.486	13985.9	24004.8	20929.3	17280.8	25712.6	22780.8
40.29_1665.8184n	40.294	1665.82	6.2126	RTLPTMCSVNVPLY	[6] Oxidation M|[7] Carbamidomethyl C	Q6SPZ3	15482.3	13117	11674.7	16941.8	19533.4	14063.5	17310.2	15724.5	16217.1
38.37_2804.3615n	38.368	2804.36	7.363	GQCVSQPQQQLQQQLGQQPQQQQL	[3] Carbamidomethyl C	Q6SPZ3	17904.3	11384.3	14002	3350.24	1396.55	3288.14	36124.5	38465.2	38666.8
39.19_2747.3396n	39.1923	2747.34	7.1876	QQQQPQQLGQCVSQPQQQLQQQL	[11] Carbamidomethyl C	Q6SPZ3	25299.9	20740.3	23362.6	1161.13	735.813	280.092	36915.4	42386.7	41362.9
39.19_2747.3394n	39.1923	2747.34	7.1876	QQQQPQQLGQCVSQPQQQLQQQL	[11] Carbamidomethyl C	Q6SPZ3	4210.07	682.93	401.409	0	0	0	6929.01	8148.79	7535.53
22.57_1566.7706n	22.5741	1566.77	6.4699	GQQPQQQQLAHGTF		Q6SPZ3	15511.5	14446.8	16291.1	20229.4	7160.94	5815.14	12927.9	12788	13390.2
27.31_933.5001n	27.3114	933.5	6.2748	QPHQIAQL		P10386	4474.23	6007.77	6132.14	21.0088	2733.56	3227.49	2545.73	4118.04	3614.56
45.74_2563.2422n	45.7414	2563.24	6.5447	TQQQQPPFSQQPPISQQQQPPF		Q6SPZ3	3995.97	3705.46	2475.89	0	0	0	1797.73	4101.54	2971.26
46.17_2563.2369n	46.1669	2563.24	6.5447	TQQQQPPFSQQPPISQQQQPPF		Q6SPZ3	27986	39925.2	36721.3	21026	17446.9	10414.9	18407	25967.9	19126.9
14.27_974.4499n	14.2747	974.45	7.1937	SQQQQPPY		Q6SPZ3	3774.64	9951.32	9842.77	747.985	2205.2	1421.66	1756.82	5160.35	4920.15
33.91_1073.5015n	33.9142	1073.5	6.5516	QQQCIPVAM	[4] Carbamidomethyl C	Q6SPZ3	5497.94	3568.35	2515.96	911.386	612.481	360.584	5627.68	7146.26	6316.6
46.54_2771.3801n	46.5388	2771.38	6.7249	SIILQQQQQQQQQQQQGQSIIQY	[5] Deamidation Q	Q6SPZ3	9875.12	2157.49	2399.01	0	0	0	21402.5	17983	23247
39.70_1898.8989n	39.6994	1898.9	7.3596	SQQQQPPFSQQQQPPF		B2Y2Q1	5059.1	6215.06	5031.72	2439.93	1357.82	390.412	9198.26	11881.7	11482.6
49.82_1868.9143n	49.8163	1868.91	6.2192	AAASAVAQISQQQQQPPF		Q6SPZ3	4599.74	5619.65	4616.66	4427.25	2996.71	4275.2	4613.63	5995.63	3699.22
40.91_3536.6640n	40.9055	3536.66	6.5467	SQQPPISQQQQPPFSQQQQPQFSQQQQPPY		Q6SPZ3	4470.4	9134.71	8074.46	1845.08	1410.6	1000.09	1844.21	6008.82	4032.28
19.62_948.4315n	19.6207	948.431	5.674	SQQQQSPF		Q6SPZ3	3393.24	4070.6	5064.59	1011.81	0	0	1612.52	2892.76	2082.25
51.21_3503.6804n	51.2083	3503.68	6.503	TQQQQPPFSQQPPISQQQQPPFSQQQQPPF		Q6SPZ3	5908.23	6909.75	7446.44	204.389	183.856	111.283	3724.64	7023.89	5221.13
34.56_1744.8279n	34.5566	1744.83	6.5871	LQQQCIPVAMQRCL	[5] Carbamidomethyl C|[11] Deamidation Q|[13] Carbamidomethyl C	Q6SPZ3	761.735	547.488	558.141	61.5987	149.823	173.29	112.182	114.437	0
12.15_3364.5970n	12.1528	3364.6	6.0903	SQQPPISQQQQQQQQQQQPFTQQQQPPF	[10] Deamidation Q|[13] Deamidation Q	Q6SPZ3	0	0	0	624.527	541.887	0.0325868	797.707	739.503	773.938
32.52_2872.2941n	32.5222	2872.29	6.0096	SQQQQPPYSQQQQPPYSQQQQPPF	[10] Deamidation Q	Q6SPZ3	129.982	35.58	0	1313.54	897.531	262.675	153.594	306.104	692.689
34.85_947.5488n	34.8469	947.549	7.7928	QAIRAIIY	[1] Deamidation Q	P04730	2.23478e+06	2.40858e+06	2.50774e+06	1.1294e+06	1.38518e+06	983737	1.94705e+06	2.33917e+06	2.16468e+06
47.10_1068.6018n	47.0998	1068.6	7.5639	VLPQQQIPF		B2Y2Q6	2.60771e+06	2.47073e+06	2.19912e+06	648018	263383	330401	2.25876e+06	2.56678e+06	2.29117e+06
31.01_942.5159n	31.0118	942.516	8.0261	SQQQQIVL		B2Y2Q6	959317	886868	917685	139357	46886.7	40421.5	716847	959301	816245
31.06_942.5056n	31.0625	942.506	8.0261	SQQQQIVL		B2Y2Q6	0	2.32941	0	0	0	0	0	0	304.177
29.24_1070.5435n	29.2447	1070.54	7.5165	YRTTTSVPF		P10386	1.31877e+06	1.38396e+06	1.54042e+06	813983	826109	655330	890380	1.01747e+06	894223
21.81_664.3928n	21.8104	664.393	8.0446	VHPSIL		B2Y2Q6	697885	753759	885567	976990	569100	491090	444648	495036	456525
19.54_1954.9504n	19.5362	1954.95	8.0619	SHHQQQQPIQQQPQPF		B2Y2Q6	1.81221e+06	1.99162e+06	2.28487e+06	150440	27598.2	40558.8	1.59423e+06	1.82808e+06	1.67669e+06
64.58_1954.9339n	64.5825	1954.93	7.0638	SHHQQQQPIQQQPQPF		B2Y2Q6	52596.7	29721.2	25163.3	56149.6	44297.5	49633.9	59294.4	38574.7	48900.8
28.94_1954.9221n	28.9404	1954.92	6.8286	QADPSGQVQWPQQQPFL	[13] Deamidation Q|[14] Deamidation Q	P06659	13335.4	15323.6	15707.7	9677.84	8226.71	9062.52	11432.4	12465.4	11441.9
13.41_1088.4803n	13.4096	1088.48	8.1142	LQQSSCHVM	[6] Carbamidomethyl C	P10386	434663	607663	662008	383187	578351	513135	365195	440398	424990
20.88_795.3785n	20.8777	795.379	7.6952	GVGTGVGSY		B2Y2Q6	392465	442699	539311	41467.4	4275.43	6579.09	395495	442062	410056
24.07_907.4787n	24.0675	907.479	8.027	RTTTSVPF		P10386	1.00873e+06	1.18998e+06	1.36746e+06	580936	590256	565942	753761	834205	742270
42.94_2708.2992n	42.943	2708.3	8.3648	SQQQQPPFSQQQPPFSQQQQQPL		B2Y2Q6	1.74285e+06	1.8792e+06	2.11468e+06	241624	49823.2	58460.1	1.67822e+06	2.09952e+06	1.82399e+06
26.55_856.4569n	26.5475	856.457	7.1969	CRVNVPL	[1] Carbamidomethyl C	B2Y2Q6	330158	356225	384188	313439	392019	384255	233216	282485	249107
42.02_1585.7607n	42.0242	1585.76	8.423	LQQQCSPVAMPQSL	[5] Carbamidomethyl C	B2Y2Q6	145098	136478	172958	157216	266068	177459	183231	211670	197249
21.24_1955.9326n	21.2356	1955.93	8.1711	SHHQQQQPIQQQPQPF	[12] Deamidation Q	B2Y2Q6	1.05534e+06	1.23766e+06	1.74069e+06	144542	54519.2	67519.3	1.12717e+06	1.14144e+06	1.11407e+06
21.54_1955.9260n	21.5399	1955.93	8.1711	SHHQQQQPIQQQPQPF	[12] Deamidation Q	B2Y2Q6	311034	203510	367081	60790.3	5280.43	6104.16	234154	236036	235318
24.79_2778.3126n	24.7861	2778.31	8.6937	GQCVSQPQQQSQQQLGQQPQQQQL	[3] Carbamidomethyl C	P10386	319483	282498	355058	253405	322636	291477	202973	298605	252097
31.57_2189.0158n	31.5697	2189.02	8.6474	QQQCCQQLPQIPQQSRY	[4] Carbamidomethyl C|[5] Carbamidomethyl C	P10386	346019	283147	327596	301383	634685	363024	334018	385295	348370
31.54_1019.5247n	31.5359	1019.52	7.859	CRVNVPLY	[1] Carbamidomethyl C	B2Y2Q6	183661	199264	214951	103731	88763.8	83403.5	178371	192970	179937
44.26_2709.2821n	44.2647	2709.28	8.0983	SQQQQPPFSQQQPPFSQQQQQPL	[19] Deamidation Q	B2Y2Q6	1.23982e+06	1.15734e+06	1.67747e+06	174380	30687.9	27500	1.61039e+06	1.68488e+06	1.67618e+06
47.07_856.4456n	47.066	856.446	7.2254	QQQPPFL		B2Y2Q6	186040	222689	209790	37524.7	10175	19023.3	137276	158344	143388
17.14_1742.8056n	17.1436	1742.81	8.8431	GQCVSQPQQQSQQQL	[3] Carbamidomethyl C	P10386	295917	459512	496708	284779	270851	292495	184680	301570	246654
50.29_1069.5810n	50.2897	1069.58	6.9279	VLPQQQIPF	[4] Deamidation Q	B2Y2Q6	55305.7	47439.1	30922.4	4057.77	7.73548	1.46568	52642.1	61635.4	39825.4
51.28_1069.5832n	51.276	1069.58	6.9279	VLPQQQIPF	[4] Deamidation Q	B2Y2Q6	421542	500680	583489	123518	53608.7	67508.3	411150	436221	400193
33.73_943.4985n	33.7254	943.498	7.4035	SQQQQIVL	[4] Deamidation Q	B2Y2Q6	79185.3	54911.7	58161.8	5588.81	35.1433	127.829	78498.8	85138.6	80973.1
28.97_1557.7524n	28.9742	1557.75	8.5007	GQQPQQQQLAQGTF		P10386	115040	84149.8	118028	251560	305231	253471	114944	125415	128738
41.53_1770.8338n	41.534	1770.83	8.1768	SQQQQPPFSQQQPPF		B2Y2Q6	212476	341793	274337	71331.7	46444.3	35742.6	137264	207224	169711
13.21_955.4722n	13.2067	955.472	7.1212	SQQQQQPL		B2Y2Q6	8493.68	53901.9	52095.9	5738.49	1108.62	1055.09	24582.1	22803	17683.9
18.85_1743.7896n	18.8458	1743.79	8.3179	GQCVSQPQQQSQQQL	[3] Carbamidomethyl C|[12] Deamidation Q	P10386	210477	278237	397677	167707	187242	198095	125097	192885	161860
26.14_2779.2964n	26.1389	2779.3	7.8454	GQCVSQPQQQSQQQLGQQPQQQQL	[3] Carbamidomethyl C|[12] Deamidation Q	P10386	194588	169509	285858	156741	272327	219036	156298	180686	179362
54.36_1778.9487n	54.3646	1778.95	7.8161	VHPSILQQLNPCKVF	[12] Carbamidomethyl C	B2Y2Q6	108767	120107	111594	142017	202966	139149	217197	160615	174791
44.47_858.4121n	44.4705	858.412	6.5154	SQQQQQL		B2Y2Q6	31973.2	32203.9	35135.5	40343.7	26107.9	36409.2	27458	24472.6	25009.5
48.78_1745.8399n	48.7793	1745.84	8.0314	SQQQLPPFSQQQSPF		B2Y2Q6	403673	604861	600622	111522	68293.5	77318.8	254001	376497	306933
31.27_1767.8494n	31.2654	1767.85	8.0194	SQQQPPFSQQQQQPL		B2Y2Q6	73501.3	106540	107966	42426.8	33584.2	32697.4	71816.8	91002.9	75400.1
40.50_1610.8137n	40.4969	1610.81	7.0048	SQQQQPVLPQQPSF		B2Y2Q6	23762	39350.9	30138.6	66749.5	41387.1	38887.7	20347.6	32668.9	24449.1
62.49_1610.8069n	62.4944	1610.81	6.0946	SQQQQPVLPQQPSF		B2Y2Q6	5473.65	5286.92	5747.14	6962.24	4356.63	13797.8	8883.01	7133.86	6224.16
47.35_2362.1600n	47.3464	2362.16	7.347	QQQPPFLQQQQPSLPQQPPF	[11] Deamidation Q|[16] Deamidation Q	B2Y2Q6	15018.4	11068.9	9647.29	109254	97882.6	87158	88555.2	98002.3	90700.8
39.05_2536.2746n	39.0541	2536.27	6.1861	SQQQQPVLPQQPSFSQQQLPPF		B2Y2Q6	33622.5	34995.6	27924.7	358252	427112	397087	39453.9	37413.4	34798.6
58.08_2536.2683n	58.0816	2536.27	6.7329	SQQQQPVLPQQPSFSQQQLPPF		B2Y2Q6	320.031	846.804	329.172	7700.29	2961.5	2137.34	217.413	605.361	477.822
60.25_3338.6331n	60.2542	3338.63	7.5642	SQQQQPVLPQQPSFSQQQLPPFSQQQSPF		B2Y2Q6	215968	254236	278421	28034.6	22939.2	20283.3	115015	162304	148508
31.03_1558.7462n	31.0287	1558.75	7.3026	GQQPQQQQLAQGTF	[7] Deamidation Q	P10386	102449	105385	105831	117607	134337	103526	88591.8	82385.4	86301.4
49.46_2711.2728n	49.4584	2711.27	7.811	SQQQQPPFSQQQQPPFSQQQPPF		B2Y2Q1	21413.7	22776	20664.6	191.744	45.4784	0	12441.6	23751	18797.2
49.49_2711.2790n	49.4922	2711.28	7.811	SQQQQPPFSQQQQPPFSQQQPPF		B2Y2Q1	74408.9	112205	122540	11252.7	10923.6	8798.62	46575.7	75807.5	62208.1
19.52_820.3721n	19.5193	820.372	7.6306	SQQQSPF		B2Y2Q6	16320.6	20364.6	23683.4	5168	2607.18	3401.04	7046.8	11515.1	9691.88
27.65_2780.2791n	27.6496	2780.28	7.3696	GQCVSQPQQQSQQQLGQQPQQQQL	[3] Carbamidomethyl C|[17] Deamidation Q|[20] Deamidation Q	P10386	55125.2	43243.9	102956	89901.8	112885	81151.4	51344.4	51506.8	58467.5
43.42_2475.2483n	43.4164	2475.25	7.8585	LQQQQPSLPQQPPFSQQQQQL		B2Y2Q6	81943.9	115243	104379	18993.2	8828.53	11593.1	49896	75993.5	63971.3
11.12_1770.8323n	11.1187	1770.83	5.6809	SQQQPPFSQQQQPPF		B2Y2Q6	5644.02	9321.59	9730.46	414.009	4754.75	4983.88	5495.39	9407.57	8468.34
39.83_1770.8417n	39.8347	1770.84	7.0319	SQQQPPFSQQQQPPF		B2Y2Q6	10259.6	13839.3	12205.3	7831.21	6486.76	3668.86	7902.44	11344.2	8703.7
35.68_1812.8024n	35.6784	1812.8	6.769	SQQQPCSQQQQQQPL	[6] Carbamidomethyl C|[11] Deamidation Q	B2Y2Q6	26578.2	23342	23297.7	37968.5	34381.1	28626.4	26375	25260.6	26919.5
13.41_975.3920n	13.4096	975.392	7.9552	QQSSCHVM	[5] Carbamidomethyl C	P10386	3422.87	4706.38	5184.44	4834.18	4133.43	3715.56	2239.61	4051.05	3179.46
32.33_2189.9989n	32.3333	2190	7.7541	QQQCCQQLPQIPQQSRY	[4] Carbamidomethyl C|[5] Carbamidomethyl C|[10] Deamidation Q	P10386	15206.9	7656.98	10997.1	15658.6	53635.3	15179.8	19764.3	20299.5	18693.9
33.03_2189.9979n	33.0294	2190	7.7959	QQQCCQQLPQIPQQSRY	[4] Carbamidomethyl C|[5] Carbamidomethyl C|[7] Deamidation Q	P10386	31277.7	14537.3	17450.9	25270.3	89835.9	24383.7	33844.8	30992.4	33758.2
56.52_2360.1880n	56.5205	2360.19	6.7209	QQQPPFLQQQQPSLPQQPPF		B2Y2Q6	39960.2	52318.2	47854.1	13313.3	8020.76	9792.99	29361.3	40650.1	33415.3
29.43_1601.7510n	29.4336	1601.75	7.5197	LQQQCSPVAMPQSL	[5] Carbamidomethyl C|[10] Oxidation M	B2Y2Q6	31472.4	29308.3	31995.6	28708.9	31044.4	26289.4	23880.1	29044.5	26816.5
42.93_1771.8176n	42.9261	1771.82	6.9769	SQQQQPPFSQQQPPF	[10] Deamidation Q	B2Y2Q6	51774	80212	96729.1	28306.4	19638.1	16060.7	34797.8	42505.3	39018.3
34.97_3282.5445n	34.9652	3282.54	7.8936	GQCVSQPQQQSQQQLGQQPQQQQLAQGTF	[3] Carbamidomethyl C	P10386	22216.1	16959	24976.7	30534.1	71164.7	39634.3	36192	34334	38267.3
45.40_2476.2219n	45.4032	2476.22	7.3804	LQQQQPSLPQQPPFSQQQQQL	[16] Deamidation Q	B2Y2Q6	25148.5	40400.3	48843.9	11966.2	7384.13	8540.51	19603.8	29554.3	23676
50.72_2712.2625n	50.7152	2712.26	7.4362	SQQQQPPFSQQQPPFSQQQQPPF	[12] Deamidation Q	B2Y2Q6	30521.5	40996.8	47571.2	8592.9	7227.79	5188.4	23832.7	32446	26763.4
54.01_3363.6225n	54.0066	3363.62	7.4062	SQQQQPPFSQQQPPFSQQQQPVLPQQPSF		B2Y2Q6	21494.1	35396.8	40256.6	2195.22	154.067	637.133	535.931	2034.07	2239.71
51.45_1773.7922n	51.445	1773.79	6.8431	SQQQQPPFSQQQPPF	[2] Deamidation Q|[3] Deamidation Q|[10] Deamidation Q	B2Y2Q6	8776.73	7121.25	8740.07	9108.78	9576.96	7420.48	5822.07	3537.33	2572.85
51.11_830.3937n	51.1069	830.394	6.9318	SQQQPPF		P10386	1835.24	1907.75	2580.39	136.635	138.685	254.168	4474.75	6031.09	5579.14
45.44_1811.8464n	45.437	1811.85	6.495	SQQQPCSQQQQQQPL	[6] Carbamidomethyl C	B2Y2Q6	3122.35	2034.79	2390.02	3217.03	3842.67	2633.8	2415.69	1835.91	1383.99
47.47_4471.2121n	47.4746	4471.21	6.5033	SIILQEQQQVQGSIQTPQQQPQQLGQCVSQPQQQSQQQL	[27] Carbamidomethyl C	B2Y2Q6	12459.1	4132.42	12307.7	1073.09	1674.83	1397.12	24636.2	22931.9	35129.5
36.37_3283.5286n	36.3744	3283.53	7.2936	GQCVSQPQQQSQQQLGQQPQQQQLAQGTF	[3] Carbamidomethyl C|[20] Deamidation Q	P10386	5378.6	1726.68	5490.49	11591.1	33761.6	12726.9	12153.2	11086.7	12639.3
48.63_4472.1957n	48.6271	4472.2	6.9036	SIILQEQQQVQGSIQTPQQQPQQLGQCVSQPQQQSQQQL	[11] Deamidation Q|[27] Carbamidomethyl C	B2Y2Q6	1304.49	362.828	1169.29	98.3887	75.333	68.459	14675.3	6637.58	17834
48.49_2423.1794n	48.4918	2423.18	7.497	SQQQPPFSQQQQPVLPQQPSF		B2Y2Q6	4258.16	6702.56	3604.52	25.0355	0	12.9507	845.208	3395.27	1910
26.85_2747.4014n	26.8518	2747.4	6.5398	SIILQEQQQVQGSIQTPQQQPQQL	[20] Deamidation Q	B2Y2Q6	1438.74	1077.5	928.029	1.35189	930.335	1201.26	1131.24	919.435	1097.09
54.99_3364.6103n	54.9932	3364.61	6.966	SQQQQPPFSQQQPPFSQQQQPVLPQQPSF	[17] Deamidation Q	B2Y2Q6	10795.8	18347.9	24810.9	1135.45	403.041	175.776	630.714	1719.94	1040.38
41.52_3351.6149n	41.517	3351.61	7.0742	SQQQPPFSQQQQPVLPQQPSFSQQQLPPF	[2] Deamidation Q|[3] Deamidation Q|[17] Deamidation Q	B2Y2Q6	562.793	267.023	363.966	1277.15	923.869	246.414	1053.96	877.518	682.021
43.38_1586.7331n	43.3825	1586.73	6.8754	LQQQCSPVAMPQSL	[2] Deamidation Q|[5] Carbamidomethyl C	B2Y2Q6	0	19.5299	151.793	0	676.36	0	0	26.4492	0
26.16_3284.5326n	26.1558	3284.53	6.168	GQCVSQPQQQSQQQLGQQPQQQQLAQGTF	[3] Carbamidomethyl C|[8] Deamidation Q|[17] Deamidation Q	P10386	193.962	57.006	138.794	238.898	32.319	553.174	169.776	41.5155	86.8726
25.60_1419.7133n	25.5951	1419.71	6.9814	RLSNQLVEGQNY		A0A1D5XGF3	667655	598521	695906	464071	408021	473336	505480	551986	502807
38.51_2252.0895n	38.5075	2252.09	7.1528	VDRMHANLPHDPCVDPVAPL	[13] Carbamidomethyl C	A0A1D5XGF3	1.20744e+06	1.07622e+06	995758	1.22268e+06	1.101e+06	1.09821e+06	1.11055e+06	1.02272e+06	1.07149e+06
31.91_996.5067n	31.9107	996.507	6.739	LTEQGRFF		A0A1D5XGF3	389458	368393	336352	411283	330760	366275	297588	292766	286804
38.16_1259.6199n	38.1552	1259.62	6.7501	QRSGPELTIEM		A0A1D5XGF3	386221	329567	325982	386845	323069	311089	329933	287882	308507
57.01_852.4045n	57.0108	852.405	7.1919	SFPGIGEF		A0A1D5XGF3	397046	330322	321208	415125	243606	242326	274080	246813	249015
55.99_1211.6442n	55.9936	1211.64	6.9285	SAPEELVQQVL		A0A1D5YFA6	509249	473956	464598	540970	377677	236411	369729	378005	355873
41.41_2154.1465n	41.4072	2154.15	7.0596	SNNLIKHGDKILDEANKVF		A0A1D5XGF3	827091	786331	554157	725998	698838	722533	693462	673544	663499
33.73_998.4774n	33.7254	998.477	6.9383	DKYLQADF		A0A1D5XGF3	490681	408044	394115	571349	533085	458851	488751	500634	492059
14.72_1495.6751n	14.7173	1495.68	6.7479	YTDQHGTRNIEY		A0A1D5XGF3	240927	246655	262777	83502	195980	254713	202292	184674	197381
15.33_849.4372n	15.3288	849.437	6.9924	LTEQGRF		A0A1D5XGF3	142223	156133	167912	150821	116454	140072	119355	119516	120643
12.71_1134.5452n	12.7136	1134.55	6.581	NDTPQRTRF	[5] Deamidation Q	A0A1D5YFA6	126952	139289	145077	157273	129053	145779	132202	118545	125082
13.17_1332.6172n	13.1729	1332.62	7.0168	TDQHGTRNIEY		A0A1D5XGF3	154152	162718	172168	170719	140746	165254	139743	128366	141367
13.17_1332.6109n	13.1729	1332.61	7.0168	TDQHGTRNIEY		A0A1D5XGF3	93755.9	101840	108314	168773	147104	132666	91497.5	86830	97382.5
14.73_1332.6131n	14.7342	1332.61	6.4425	TDQHGTRNIEY		A0A1D5XGF3	57652.4	75307.6	81120.2	45081.5	54847.2	75077.6	51646.3	46397.2	48245.7
25.02_866.4499n	25.02	866.45	6.5913	ELVHEAGL		A0A1D5XXC9	185260	178975	188183	167371	113540	143225	122512	131612	119919
54.96_1103.5335n	54.9594	1103.53	6.6815	TLGVDDQPLF		A0A1D5XGF3	158775	157235	174142	191068	192915	176368	228065	237772	207478
21.74_814.3526n	21.7428	814.353	6.2892	FVDNGTY		A0A1D5XGF3	158428	118730	140135	207598	92610.4	145909	99349	89369.5	94824.4
21.25_1491.7432n	21.2525	1491.74	6.3233	KVPSHAAEVTAGYY		A0A1D5XXC9	159825	142725	168143	133426	112218	139432	119662	127776	114822
61.25_2590.3054n	61.2489	2590.31	7.1246	QAAQPKLEPFPFEEHTDLPVQGL		A0A1D5XGF3	189071	191018	171587	229488	147075	92198.3	143604	131571	127419
35.78_956.4818n	35.7798	956.482	6.4937	TLGVDDQPL		A0A1D5XGF3	248852	203751	195409	242128	176283	173137	185038	174942	185080
30.20_1725.9416n	30.1974	1725.94	6.2602	IKHGDKILDEANKVF		A0A1D5XGF3	295418	269978	108499	121496	132619	226419	176193	218952	190989
42.88_1479.7381n	42.8753	1479.74	6.5878	VRNVGVSDPDIFY		A0A1D5XXC9	104791	102929	97373.3	105126	106500	101857	84188.8	88518.5	85773.9
43.01_1479.7331n	43.0106	1479.73	6.5878	VRNVGVSDPDIFY		A0A1D5XXC9	820.371	60.6346	0	0	150.659	0	0	108.795	0
15.36_736.3508n	15.3626	736.351	6.8123	TEQGRF		A0A1D5XGF3	40536.4	38363.4	42123.1	41699.2	26008.6	35757.2	28424	28800.7	30209.1
19.79_1003.5433n	19.7926	1003.54	6.0455	VEGKGPRVY		A0A1D5XXC9	105866	93268	99826.6	28399.3	67432.2	100930	89452.9	77829.4	80559.8
38.80_1316.6672n	38.8006	1316.67	6.1791	VRNVGVSDPDIF		A0A1D5XXC9	130753	113605	119050	132859	95281.2	117478	104655	98639.9	102776
38.87_1316.6727n	38.8682	1316.67	6.1791	VRNVGVSDPDIF		A0A1D5XXC9	1134.15	24.0739	125.307	224.336	533.903	66.6285	452.028	369.909	455.07
14.34_1729.6741n	14.3423	1729.67	7.1469	TCAEMRDSEQSSQAM	[2] Carbamidomethyl C	A0A1D5YFA6	125079	153280	154548	73719.1	95361.9	115604	78313.4	91509.8	83508.5
71.29_1288.5817n	71.2869	1288.58	7.1427	SFPGIGEFICY	[10] Carbamidomethyl C	A0A1D5XGF3	85121.3	48380	58314.6	106002	120695	165787	126982	71064.8	94116.2
19.81_1173.6485n	19.8096	1173.65	6.5932	GLVEGKGPRVY		A0A1D5XXC9	188952	163577	187418	63814.1	125717	156156	140884	134008	137138
24.68_1608.7581n	24.679	1608.76	7.0135	YTDQHGTRNIEYL		A0A1D5XGF3	133163	103480	114825	125998	84036.6	116199	87872.1	79435.8	82013.8
26.90_1420.6881n	26.9028	1420.69	6.4926	RLSNQLVEGQNY	[10] Deamidation Q	A0A1D5XGF3	105908	102802	123300	59140.5	79850.5	99091.1	93243.2	85493.4	90928.5
25.83_883.4193n	25.8346	883.419	6.6985	TEQGRFF		A0A1D5XGF3	59160.5	52737.4	56455.7	59396.3	37314.1	49594.3	39380.8	38134.4	37270.3
31.89_883.4181n	31.8938	883.418	6.8115	TEQGRFF		A0A1D5XGF3	30039.6	24073.4	24219.8	26430.2	17703.2	25252.3	19071.5	17922.8	17720.6
31.46_1107.6278n	31.457	1107.63	6.5168	ELVHEAGLKL		A0A1D5XXC9	64284.1	41116	43530.9	55974.3	62028.6	43867.5	47620.8	48390.7	54094
17.40_1194.5612n	17.3973	1194.56	6.5145	FHGRSAVQMY		A0A1D5XGF3	66050.2	55765.2	65762	53146.1	94035.7	123676	60238.1	51440.7	47770.4
22.13_1445.7000n	22.1345	1445.7	6.2581	TDQHGTRNIEYL		A0A1D5XGF3	56966	29155.9	32617.8	79087.3	73154	88454.8	65875	64189.7	69095.6
39.04_1759.8057n	39.0372	1759.81	6.2452	VGHPEWEFPRDAGTY		A0A1D5XXC9	47548	26961.2	40719.5	53729.5	67349.4	70816	79452.6	52338.6	88173.4
36.26_1750.8478n	36.256	1750.85	6.7639	HANLPHDPCVDPVAPL	[9] Carbamidomethyl C	A0A1D5XGF3	106064	89065.2	84553.7	100081	78024.8	66345.7	92768.4	91586.3	71866.5
36.44_1750.8508n	36.442	1750.85	6.0795	HANLPHDPCVDPVAPL	[9] Carbamidomethyl C	A0A1D5XGF3	10909.4	18182	19544.2	3450.28	4780.74	5030.39	7791.65	11525.8	6465
28.43_1654.7991n	28.4304	1654.8	6.371	YKVPSHAAEVTAGYY		A0A1D5XXC9	53660.4	46989.7	48038.2	52738	39533.4	50880.9	44291.5	39948.3	40220.7
35.71_1359.7279n	35.7122	1359.73	6.0266	WGLVEGKGPRVY		A0A1D5XXC9	28601.1	12047.8	20742.7	29885.2	34876.8	39669.8	38753.4	23131.7	37102.2
59.90_1212.6247n	59.8963	1212.62	6.0392	SAPEELVQQVL	[8] Deamidation Q	A0A1D5YFA6	67814.7	59784.3	71562.5	80935.3	53286.7	62005.2	56086.8	53280.7	50961.1
10.98_988.4399n	10.9834	988.44	5.6832	NLHDRDGY		A0A1D5XGF3	13260.4	15668.8	13896.8	8227.16	11915.3	21551.2	10639.9	12070.6	10267.8
23.43_1150.5330n	23.4321	1150.53	6.9676	SNQLVEGQNY		A0A1D5XGF3	71510.8	62548.2	71284.2	50034.5	34162.8	44348.7	43933.1	42705	41114.4
34.18_1639.7422n	34.1847	1639.74	6.7273	ACENALPRYDPTAY	[2] Carbamidomethyl C	A0A1D5YFA6	40954	30239.8	30729.7	37609.3	30283.6	34864.7	36886.3	30673.8	35804.1
15.70_1328.6709n	15.7008	1328.67	6.2871	KVPSHAAEVTAGY		A0A1D5XXC9	43784.5	50292.8	54582.9	38819.9	38526.6	50587.5	41718.3	37500.6	37064.4
61.15_1597.8843n	61.1531	1597.88	6.7639	ILQAAQPKLEPFPF		A0A1D5XGF3	64178.6	57333.2	57442.1	72181.8	35578.6	37344.6	46316	41427.6	38981
68.94_1615.8741n	68.9421	1615.87	6.7341	VMLPLDIVSVNNRF		A0A1D5XXC9	8123.55	9559.26	9403.81	35803.7	32680.1	35121.2	38713.4	19033.6	25877.4
11.12_1745.6664n	11.1187	1745.67	6.7398	TCAEMRDSEQSSQAM	[2] Carbamidomethyl C|[15] Oxidation M	A0A1D5YFA6	14694.5	17145.8	16385.1	63.4402	6909.69	9661.25	6474.81	7571.09	6068.02
25.02_624.3256n	25.02	624.326	5.6351	VHEAGL		A0A1D5XGF3	9190.27	10933.1	12899.9	8807.73	5816.39	7959.72	6764.2	6957.91	6320.77
43.25_2628.2961n	43.2473	2628.3	6.5176	KTFVDRMHANLPHDPCVDPVAPL	[16] Carbamidomethyl C	A0A1D5XGF3	18346.5	9729.9	8492.53	18817.9	37493.1	18116.8	21867.9	14144.1	16400.6
26.11_1990.7852n	26.1051	1990.79	6.5332	NFTCAEMRDSEQSSQAM	[4] Carbamidomethyl C	A0A1D5YFA6	26421.7	16228.8	19447.3	24891.1	20162.9	28623.6	22552.1	15084.8	20155
11.42_1745.6690n	11.423	1745.67	5.7996	TCAEMRDSEQSSQAM	[2] Carbamidomethyl C|[5] Oxidation M	A0A1D5YFA6	9175.93	8090.74	6880.41	1113.74	3018.54	5009.48	2585.11	3225.32	3497.96
63.00_2331.1050n	63.0016	2331.11	6.0496	RDSEQSSQAMSAPEELVQQVL		A0A1D5YFA6	8794	8385.72	8397.74	11578.2	8534.02	20787.5	9575.05	9435.61	10953.2
63.00_2331.0973n	63.0016	2331.1	6.0496	RDSEQSSQAMSAPEELVQQVL		A0A1D5YFA6	1077.06	363.038	390.42	1904.86	1078.22	6194.33	1878.86	1191.27	1658.79
15.35_1730.6606n	15.3457	1730.66	6.3072	TCAEMRDSEQSSQAM	[2] Carbamidomethyl C|[10] Deamidation Q	A0A1D5YFA6	8114.45	9404.29	13449.4	13846.6	6976.94	8897.26	5194.11	4800.29	5225.12
64.85_1694.7720n	64.853	1694.77	6.1334	SFPGIGEFICYDKY	[10] Carbamidomethyl C	A0A1D5XGF3	8680.23	5547.74	5253.98	13112.7	13136.1	13109.5	20410.9	8682.48	12752.8
69.03_1062.5394n	69.0295	1062.54	5.8934	DIVSVNNRF		A0A1D5XXC9	2695.98	2836.79	2990.79	6348.05	7757.68	5543.38	6649.95	4636.6	5679.39
61.76_1069.5662n	61.7646	1069.57	5.7187	LTLGVDDQPL		A0A1D5XGF3	250.343	94.8438	51.5302	354.94	85.7672	2368.16	162.849	144.481	141.31
61.87_1069.5637n	61.866	1069.56	5.7187	LTLGVDDQPL		A0A1D5XGF3	5403.71	4808.14	5252.94	3349.22	3063.31	8159.17	3149.76	3480.18	4400.48
39.67_2303.0748n	39.6656	2303.07	5.9264	KAAAAMVGHPEWEFPRDAGTY		A0A1D5XXC9	3150.05	2496.14	2423.71	3547.84	5717.68	3638.08	6199.76	4203.82	5853.16
39.07_1884.8364n	39.071	1884.84	5.6231	NMACENALPRYDPTAY	[4] Carbamidomethyl C	A0A1D5YFA6	3485.94	1351.62	1776.87	6612.23	6165.43	5365.6	5312.08	3068.97	3577.58
39.19_1260.6040n	39.1923	1260.6	5.6513	QRSGPELTIEM	[1] Deamidation Q	A0A1D5XGF3	615.917	0	0	0	334.84	135.841	644.662	114.06	368.223
62.00_2591.2910n	62.0013	2591.29	6.0775	QAAQPKLEPFPFEEHTDLPVQGL	[1] Deamidation Q	A0A1D5XGF3	15.8912	8.37563	0	196.498	183.973	1038.57	14.9587	21.3953	40.8053
25.29_1151.5081n	25.2905	1151.51	5.962	SNQLVEGQNY	[3] Deamidation Q	A0A1D5XGF3	781.507	41.793	251.838	0	59.9487	23.727	137.89	32.3549	62.3108
22.49_749.3692n	22.4895	749.369	6.9073	GVGAGVGAY		Q00M56	83477.8	94001.2	114129	131963	80427	78692.1	108064	116955	99839.1
37.00_811.4614n	37.0028	811.461	7.7156	FVHPSIL		Q00M56	111789	114897	135032	16447.5	12525.1	16216.6	228310	265841	238711
13.11_1018.5202n	13.1053	1018.52	7.3911	QIPQQSRY		Q00M56	155793	201760	240088	84847.5	80697.9	92145.5	252603	284619	282276
24.89_1131.6040n	24.8918	1131.6	7.7522	LQIPQQSRY		Q00M56	84722.6	88780.6	128342	18130.1	16729.8	16343.9	126064	155050	133967
24.05_1761.9258n	24.0506	1761.93	5.949	SQQQQQPVLPQQQIL		Q00M56	47943.6	42927.8	48877.7	38316.5	41229.8	38290.5	45992.5	38415.5	44598.7
42.69_1761.9320n	42.6865	1761.93	6.7905	SQQQQQPVLPQQQIL		Q00M56	5594.53	11387.7	10257.3	2809.16	2453.18	1699.24	5545.48	11168.4	9384.97
45.11_2702.2455n	45.1059	2702.25	7.0069	SQQQQPPFSQQQPPFSQQQQPSF	[2] Deamidation Q	Q00M56	18325.6	8286.62	8505.32	15059.9	23478.3	44141	58905.5	25100.5	62504.4
55.79_1909.0018n	55.7907	1909	7.5179	SQQQQQPVLPQQQILF		Q00M56	33550.2	55634	68890.8	8967.77	7655.12	5015.84	40104.8	63557	58222.6
44.98_1620.8101n	44.9777	1620.81	7.6025	SQQQQPVLPQQPPF		B2Y2Q1	34107.9	50742.9	43283.7	70702.6	41990.1	60093.5	27846.6	29997.5	31751.8
66.70_3525.8089n	66.7016	3525.81	6.8926	SQQQQPILPQQPPFSQQQQQPVLPQQQILF		Q00M56	13655.5	18606.5	24287.7	6769.28	8078.77	4110.12	23631.3	27880.3	29397.5
25.78_1204.5346n	25.7839	1204.53	7.5638	QQQCCQQLL	[4] Carbamidomethyl C|[5] Carbamidomethyl C	Q00M56	3412.37	2015.87	2858.88	1141.79	1584.63	826.829	4735.28	6409.59	5212.15
47.73_4503.1980n	47.7282	4503.2	6.4697	SIILQEQQQVQGSIQTQQQQPQELGQCVSQPQQQSQQQL	[27] Carbamidomethyl C	Q00M56	1794.42	779.291	2520.84	11924.6	32243.4	20413.5	19643.3	15603.3	26597.7
47.90_4503.2048n	47.8972	4503.2	6.4697	SIILQEQQQVQGSIQTQQQQPQELGQCVSQPQQQSQQQL	[27] Carbamidomethyl C	Q00M56	256.768	61.067	32.5558	535.485	7003.29	1656.85	4993.07	4551.4	6273.79
13.17_3577.6529n	13.1729	3577.65	5.7147	SHQQQQQPVQQQPQPFPQQQPCSQQQQPPL	[10] Deamidation Q|[22] Carbamidomethyl C	Q00M56	1322.95	7287.48	4600.21	19.2414	0	0	0	560.469	355.989
36.05_1760.8230n	36.0503	1760.82	6.6495	SQQQPPFSQQQQPSF		Q00M56	4874.98	6675.12	5148.65	3700.67	3175.08	2275.73	1013.76	2918.38	4057.3
39.60_1889.8575n	39.598	1889.86	6.7363	SQQQQPSFSQQQQPPF	[13] Deamidation Q	Q00M56	11469.7	9090.3	8520.6	9651.24	7608.88	3118.42	8176.16	7815.23	7089.03
39.67_1889.8624n	39.6656	1889.86	6.7363	SQQQQPSFSQQQQPPF	[13] Deamidation Q	Q00M56	7765.01	7108.31	6512.27	3831.61	2618.41	918.134	9781.18	10075.8	7836.99
47.17_2778.4183n	47.1674	2778.42	6.9823	SIILQEQQQVQGSIQTQQQQPQEL		Q00M56	0	0	0	12689	27040.2	13308.7	2240.27	2508.18	2746.56
60.90_1032.5222n	60.8995	1032.52	6.6492	AVAATSAIAQM		P10386	2878.52	2505.74	2776.16	3040.26	1858.42	1762.08	2566.68	2444.81	2488.19
43.98_2352.1473n	43.9773	2352.15	6.0168	QEQQQVQGSIQTQQQQPQEL		Q00M56	2383.04	1511	1160.71	3217.65	1509.54	1810.01	1441.35	1300.59	1856.6
59.01_3378.7450n	59.0143	3378.74	6.767	SQQQQPILPQQPPFSQQQQQPVLPQQQIL		Q00M56	2756.29	4223.13	4444.58	899.037	864.627	264.551	3151.51	4695.68	4721.99
33.13_1288.6426n	33.1308	1288.64	6.253	VRNVGASDPDIF		A0A1D5YFA6	2804.84	1043.91	475.24	0	0	0	660.388	1041.25	989.908
33.25_1288.6463n	33.252	1288.65	6.253	VRNVGASDPDIF		A0A1D5YFA6	280046	315783	279878	353408	347850	289595	265830	253891	249538
25.26_1505.7522n	25.2567	1505.75	6.1525	KVPSHAAEITAGYY		A0A1D5YFA6	245885	205548	222129	238673	160368	177508	152729	145139	145002
31.54_1668.7996n	31.5359	1668.8	5.7862	YKVPSHAAEITAGYY		A0A1D5YFA6	208880	248277	267107	238099	242015	207712	263094	292754	262737
31.93_1668.7963n	31.9276	1668.8	5.7862	YKVPSHAAEITAGYY		A0A1D5YFA6	666896	727124	828828	865551	843615	653314	671856	821739	729399
18.98_1342.6870n	18.9783	1342.69	6.0411	KVPSHAAEITAGY		A0A1D5YFA6	89872	79872.5	95310.9	23570	53364.1	67361.6	42278.2	47289.6	42957.9
28.92_1106.6442n	28.9179	1106.64	5.8004	QLVHEAGLKL		A0A1D5YFA6	53397.3	33373.5	30217.8	22600.5	31306.3	33568.6	25901.7	22091.2	25299.6
38.00_1451.7064n	38.0031	1451.71	6.4522	VRNVGASDPDIFY		A0A1D5YFA6	128960	122166	113733	41889.2	38032.9	31119.9	78426	82449.1	78372.7
14.41_821.4860n	14.4102	821.486	5.5855	LGHRVQL		A0A1D5XGF3	28046.6	43701.6	43500.3	13339.7	21750.6	12749.7	24912.6	24808.6	19513.4
14.41_821.4805n	14.4102	821.48	5.5855	LGHRVQL		A0A1D5XGF3	895.543	2302.85	2651.27	842.272	952.949	408.769	1166.21	1146.52	842.247
40.29_1787.7993n	40.294	1787.8	6.4235	VGHPEWEFPRDAGQY	[14] Deamidation Q	A0A1D5YFA6	103203	88829.3	78119.4	77727.7	76494.2	81759	91408	85752.9	74395.6
23.10_1020.5028n	23.101	1020.5	6.4307	DAVSVNNRF		A0A1D5XGF3	49174.7	45799.7	51245.9	49170.3	37894.7	47162.6	39343.3	37794.5	37867.3
23.10_1020.5102n	23.101	1020.51	6.4307	DAVSVNNRF		A0A1D5XGF3	1551.43	535.745	649.36	2758.21	720.63	696.833	468.907	346.169	489.639
16.99_989.5297n	16.9914	989.53	5.7572	VEAKGPRAY		A0A1D5YFA6	3371.5	4106.32	4233.04	3002.08	4415.82	4470.43	37416.8	32474.2	37331.7
35.78_994.4328n	35.7798	994.433	5.5538	EASVQQGNY		A0A1D5XGF3	33524.6	30819.8	25780.5	31871.6	26487.3	24724.2	18006.4	18575.6	25474.8
35.85_994.4311n	35.8474	994.431	5.5538	EASVQQGNY		A0A1D5XGF3	2488.38	453.084	276.179	3361.74	3461.2	1826.37	3730.42	3816.61	3921.82
38.46_1786.8146n	38.4624	1786.81	6.7134	VGHPEWEFPRDAGQY		A0A1D5YFA6	4178.81	3479.73	2624.33	5516.8	5222.33	5834.64	4502.49	3470.7	10224
22.68_865.4639n	22.6755	865.464	6.4702	QLVHEAGL		A0A1D5YFA6	5202.18	4304.49	4863.63	10647.1	2546.72	2877.21	1217.24	1524.85	1167.35
58.95_1573.8275n	58.9467	1573.83	7.0469	VMLPLDAVSVNNRF		A0A1D5XGF3	12847.3	7739.76	9182.4	14148.2	10424.4	865.967	12966.1	9430.64	11120.1
62.80_1583.8687n	62.7987	1583.87	6.4134	ILQAAQPKLDPFPF		A0A1D5YFA6	5308.46	5112.14	4779.57	5079.77	2077.43	9526.94	3571.79	3093.03	2832.59
62.83_1583.8653n	62.8325	1583.87	6.4134	ILQAAQPKLDPFPF		A0A1D5YFA6	9408.98	8654.34	7857.32	8141.05	3266.7	22253.2	3698.18	5094.49	4819.14
23.17_1614.7467n	23.1686	1614.75	5.9467	MEASVQQGNYVQVY		A0A1D5XGF3	5887.26	6184.28	6887.11	9428.04	2964.17	4864.6	3083.32	4212.24	4248.68
50.48_582.3763n	50.4785	582.376	6.6608	GIPALL		P10388	562009	539715	440131	453119	407039	304536	480689	474282	450699
25.63_579.2915n	25.6289	579.292	7.0319	YPTSL		P10388	355859	400201	420636	320880	175314	200614	194049	226876	194917
15.08_1176.5911n	15.0836	1176.59	7.6153	HVSVEHQAASL		P10388	318896	435755	439492	199427	339113	321231	301666	331739	303651
44.07_3438.6475n	44.0675	3438.65	7.9234	KACQQVMDQQLRDISPECHPVVVSPVAGQY	[3] Carbamidomethyl C|[18] Carbamidomethyl C	P10388	653280	583387	533943	691063	886664	699110	821812	689266	794042
39.41_1635.7932n	39.4064	1635.79	7.5111	LQPGQGQQGYYPTSL		P10388	370966	361662	354483	416804	387131	334316	330763	357573	335563
41.96_2593.2643n	41.9566	2593.26	7.8449	DQQLRDISPECHPVVVSPVAGQY	[11] Carbamidomethyl C	P10388	632809	595488	639186	588300	516911	454068	489231	579133	535205
73.05_768.4549n	73.051	768.455	7.511	WGIPALL		P10388	69981.9	20033.1	74025.3	64929.4	85775.9	106317	121409	84673.9	131574
15.31_1074.5121n	15.3119	1074.51	8.035	LQPGQGQQGY		P10388	213017	265688	299543	179371	140447	135369	156791	183312	171983
23.35_1513.7163n	23.3546	1513.72	7.4684	SSYHVSVEHQAASL		P10388	207876	161132	181574	167258	204234	195509	159738	141699	147213
34.63_1427.6484n	34.6341	1427.65	7.8161	YPSVTCPQQVSY	[6] Carbamidomethyl C	P10388	478337	490983	478972	140665	101276	99908.8	442537	474846	445450
17.86_2413.1192n	17.8566	2413.12	7.9949	YPGQASPQRPGQGQQPGQGQQGY		P10388	228178	291010	319028	2292.6	1123.92	1216.1	137367	163924	172219
46.25_2596.3142n	46.2514	2596.31	6.3633	EQQIVVPPKGGSFYPGETTPPQQL		P10388	905012	810368	741712	947276	892401	764662	764078	745744	767347
33.89_2109.0322n	33.8874	2109.03	7.5875	RDISPECHPVVVSPVAGQY	[7] Carbamidomethyl C	P10388	116362	114457	105011	104680	68795.7	82539.9	59988.2	84541.5	69537.4
32.00_1858.8865n	31.9952	1858.89	7.7409	QCERELQELQEREL	[2] Carbamidomethyl C	P10388	133486	112812	75842.6	72976.1	124737	53974.8	106215	105662	101731
22.10_1652.8142n	22.1007	1652.81	7.1824	LTSPQQSGQGQQPGQL		P10388	233416	217427	247027	241307	149797	171296	155357	177135	184414
41.33_1538.7343n	41.3282	1538.73	7.9281	QLGQGQQGYYPTSL		P10388	131499	128219	109083	136041	143071	112356	124106	131334	122952
70.03_1761.8445n	70.03	1761.84	5.7062	DPTSPQQPGQGQQPGQL		P10388	96846.4	115255	110136	12349	6245.3	4138.73	95023.4	118929	109659
40.53_1636.7911n	40.5307	1636.79	6.7334	LQPGQGQQGYYPTSL	[2] Deamidation Q	P10388	103832	95385.7	103083	144578	152238	135217	99334.9	101279	99071.7
40.53_1636.7745n	40.5307	1636.77	6.7334	LQPGQGQQGYYPTSL	[2] Deamidation Q	P10388	390.049	0	0	103.479	843.995	0	430.55	216.56	173.507
11.61_961.4284n	11.6118	961.428	5.9232	QPGQGQQGY		P10388	18914.3	24453.5	21697.5	1083.83	6857.89	7481.87	25043.9	28724.9	23716.5
13.38_961.4110n	13.3758	961.411	5.5781	QPGQGQQGY		P10388	17902.6	31966.3	31550.1	39012.4	35245.6	21909.9	22794.9	29129.6	27501.9
36.14_1609.7351n	36.1447	1609.74	7.3167	QQSGQGQPGYYPTSL		P10388	80408.2	81187.2	82702.3	108014	85406	75277.3	63024.6	77859.9	69919.7
19.00_1221.5435n	18.9952	1221.54	7.7204	QQPGQGQPGYY		P10388	68749.1	75170.2	77433.4	58773.5	76483.3	73166.8	60077.7	69295.1	45493.7
31.72_1842.7875n	31.7247	1842.79	5.803	QQTGQGQQSGQGQQGYY	[13] Deamidation Q	P10388	88917.1	88309.7	87572.1	50956	80869.7	56973.4	50468.6	67600.3	64394.4
18.65_2414.1025n	18.6542	2414.1	7.1969	YPGQASPQRPGQGQQPGQGQQGY	[12] Deamidation Q	P10388	89537.3	101562	139696	6118.86	1760.75	4137.37	53490.5	59111.1	62856.6
39.50_3454.6424n	39.4966	3454.64	7.2664	KACQQVMDQQLRDISPECHPVVVSPVAGQY	[3] Carbamidomethyl C|[7] Oxidation M|[18] Carbamidomethyl C	P10388	90686.6	71869.2	68056.1	78662.7	17609.7	73152.4	71798	63499.7	71917.7
28.38_2416.1421n	28.3796	2416.14	7.2652	QQPEQGQPRYYPTSPQQSGQL		P10388	92215.3	92129.5	92533.2	12266.6	3732.77	6650.02	52381.2	59700.2	60926.4
46.01_2171.0171n	46.0147	2171.02	7.0653	YPTSLQQSGQGQPGYYPTSL		P10388	69380.6	59871.4	64790.6	63180.6	53952.5	50519.4	47287.1	49826.8	46602.3
13.34_1445.6709n	13.342	1445.67	5.8606	GQWLQPGQGQQGY		P10388	43545.1	57149.8	62292	55416.7	60131.3	55318.1	37202	49680.3	43086.9
23.76_1653.7997n	23.7632	1653.8	6.2764	LTSPQQSGQGQQPGQL	[15] Deamidation Q	P10388	109747	114264	146848	116836	90078.2	98747.8	82254	87022.8	88985.7
39.96_2050.9526n	39.9559	2050.95	6.4411	YYPTSPQLSGQGQRPGQW	[11] Deamidation Q|[17] Deamidation Q	P10388	3504.72	1223.66	987.008	725.321	1995.14	514.485	2073.58	2415.1	2428.48
39.99_2050.9509n	39.9897	2050.95	6.4411	YYPTSPQLSGQGQRPGQW	[11] Deamidation Q|[17] Deamidation Q	P10388	30496	26467.7	23164.9	31220.6	36646.1	29470.1	28258.2	25663.1	27294.3
42.94_673.3389n	42.943	673.339	6.7331	QEREL		P10388	6206.56	7142.45	8347.65	8603.3	6725.98	7602.8	5294.07	5080.19	5494.85
33.79_2584.2346n	33.793	2584.23	6.9304	LQPGQGQQGYYPTSPQQPGQGQQL		P10388	3340.14	17602.8	18359	726.171	1405.64	581.843	468.864	1690.48	271.902
33.98_2584.2292n	33.9818	2584.23	6.9304	LQPGQGQQGYYPTSPQQPGQGQQL		P10388	6931.69	3841.6	2601.07	0	0	0	3501.28	5173.87	4368.18
34.05_2584.2171n	34.0495	2584.22	6.7929	LQPGQGQQGYYPTSPQQPGQGQQL		P10388	22604	22515.6	17399.6	12725.5	10721.1	8561.99	17733.2	21779.2	20290.6
27.96_3684.6689n	27.9567	3684.67	6.4042	YPGQASPQRPGQGQQPGQGQQGYYPTSPQQPGQW	[12] Deamidation Q|[20] Deamidation Q	P10388	30462.3	14780.4	33357	142.216	13.9774	0	37753.4	29982.1	46585.1
42.38_1539.7274n	42.3822	1539.73	6.4123	QLGQGQQGYYPTSL	[1] Deamidation Q	P10388	18093.9	15684.2	14379.7	32445.5	19222.8	24323.2	15029.2	16353.7	16126.9
46.76_3439.6443n	46.7617	3439.64	6.8324	KACQQVMDQQLRDISPECHPVVVSPVAGQY	[3] Carbamidomethyl C|[4] Deamidation Q|[18] Carbamidomethyl C	P10388	24768.8	19500.6	20918	32244.3	36160.6	34881	32097.6	25087.7	28762.5
46.76_3439.6288n	46.7617	3439.63	6.8324	KACQQVMDQQLRDISPECHPVVVSPVAGQY	[3] Carbamidomethyl C|[4] Deamidation Q|[18] Carbamidomethyl C	P10388	3445.67	644.962	118.634	3317.88	8789.55	2712.3	7825.92	5434.35	8118.84
36.49_3682.6947n	36.4927	3682.69	6.7139	YPGQASPQRPGQGQQPGQGQQGYYPTSPQQPGQW		P10388	6212.28	2045.42	5087.52	1874.46	1108.12	1897.97	19200.4	12527	32249.8
31.60_2403.0759n	31.6035	2403.08	7.0911	YPTSLQQTGQGQQSGQGQQGYY		P10388	28960.7	25156.4	25004.3	22377.4	32638	26182.6	24441.9	28837.7	26339.6
16.43_1075.4954n	16.4306	1075.5	6.7467	LQPGQGQQGY	[5] Deamidation Q	P10388	7981.11	11025.5	16082.4	11635.5	5467.13	4725.87	5349.84	5689.58	5941.99
35.56_1297.5853n	35.56	1297.59	6.9479	GQGQQGYYPTSL		P10388	24881.4	23454.7	21557.5	28626.9	21625.6	18790.1	15770.8	16221.4	14844.8
15.40_1841.7943n	15.3964	1841.79	6.6315	QQTGQGQQSGQGQQGYY		P10388	12004.3	11434.9	13775.5	10193.9	11239.9	12240.7	8901.01	11143.2	10390.7
37.00_1610.7320n	37.0028	1610.73	6.2813	QQSGQGQPGYYPTSL	[5] Deamidation Q	P10388	16236	13825.1	15300.4	38539	24582.9	22560.7	15556.1	14096.6	14363.8
26.48_1809.8652n	26.4799	1809.87	7.1782	YPTSPQQPGQGQQPGQL		P10388	12216.2	18534.9	20248	6586.47	840.364	2372.24	1500.21	3799.49	3265.61
57.76_1809.8768n	57.7575	1809.88	5.5174	YPTSPQQPGQGQQPGQL		P10388	1659.19	1366.28	1717.06	1816.36	1064.15	1500.18	2276.44	2005	2141.94
26.02_3961.9358n	26.0206	3961.94	6.0056	DQQLRDISPECHPVVVSPVAGQYEQQIVVPPKGGSF	[11] Carbamidomethyl C|[25] Deamidation Q|[26] Deamidation Q	P10388	927.655	978.28	985.086	1980.23	6958.28	3447.09	12827.8	11018.4	10649.3
36.97_2048.9761n	36.9689	2048.98	6.7912	YYPTSPQLSGQGQRPGQW		P10388	6515.81	1077.73	3102.08	712.579	255.901	194.465	15853.4	12748.5	28299.9
36.24_1204.5865n	36.2391	1204.59	5.8775	ADASSAGGPRVAF		P93693	4333.9	1978.71	2237.44	4807.74	2310.75	3942.89	4113.81	3664.65	3705.94
35.64_2856.3463n	35.6445	2856.35	7.0524	QQLGQGQSGYYPTSPQQPGQGQQPGQL		P10388	16860.1	24560.5	24153.8	12484.2	5664.52	5672.62	8075.36	11065	11437.2
35.68_2856.3366n	35.6784	2856.34	6.908	QQLGQGQSGYYPTSPQQPGQGQQPGQL		P10388	4000.76	2488.85	1785.24	1359.11	630.456	81.7894	1165.13	2273.9	1844.9
11.42_1363.6163n	11.423	1363.62	5.9045	CRLEGGDALSASQ	[1] Carbamidomethyl C|[13] Deamidation Q	P10388	1132.39	1147.53	1311.28	198.511	1544.06	1158.15	1847.26	1467.74	886.893
11.22_1678.7319n	11.2201	1678.73	5.6631	QQTGQGQQSGQGQQGY		P10388	4075	3907.06	3597.31	169.213	3537.5	3940.25	3578.72	3921.57	2569.49
11.25_1678.7292n	11.2539	1678.73	5.5797	QQTGQGQQSGQGQQGY		P10388	2473.07	3106.03	2612.59	888.809	2912.28	3297.72	3760.63	3290.57	2046.99
13.97_1678.7449n	13.9703	1678.74	5.6369	QQTGQGQQSGQGQQGY		P10388	931.515	1235.21	1240.75	238.895	1610.62	979.927	973.349	973.72	1046.83
24.66_2631.1768n	24.6621	2631.18	6.2083	QQPGQGQPGYYPTSPLQPGQGQPGY	[1] Deamidation Q|[7] Deamidation Q	P10388	11879	9665.28	11472	9230.84	9211.51	8581.42	8009.43	8339.08	8726.23
23.20_2577.1360n	23.2025	2577.14	6.3341	QQPAQGQQPGQGQQGQQPGQGQPGY	[1] Deamidation Q	P10388	13261.9	14674.4	17102.7	2745.52	2342.24	2487.44	2657.03	3125.84	2756.04
43.28_2594.2394n	43.2811	2594.24	6.6161	DQQLRDISPECHPVVVSPVAGQY	[3] Deamidation Q|[11] Carbamidomethyl C	P10388	5822.95	3148.94	3132.94	3778.48	6518.08	1381.14	5084.28	3775.88	3986.68
29.14_1229.5929n	29.1433	1229.59	6.7722	YPGETTPPQQL		P10388	6955.7	6296.17	5158.4	4803.64	5138.11	1382.97	960.54	2526.67	1703.87
10.08_3825.6977n	10.0845	3825.7	5.605	YPSVTCPQQVSYYPGQASPQRPGQGQQPGQGQQGY	[6] Carbamidomethyl C|[8] Deamidation Q|[9] Deamidation Q|[20] Deamidation Q	P10388	2898.08	1513.34	1284.39	377.085	1584.62	1874.52	907.363	887.66	1581.45
28.58_3685.6612n	28.5825	3685.66	6.208	YPGQASPQRPGQGQQPGQGQQGYYPTSPQQPGQW	[8] Deamidation Q|[29] Deamidation Q|[30] Deamidation Q	P10388	3161.19	432.587	2346.37	0	0	0	5267.92	3281.87	5955.09
15.99_1539.7275n	15.991	1539.73	6.2055	TSPQQSGQGQQPGQL		P10388	3402.04	4843.86	5203.41	2868.02	843.317	2439.3	1331.72	2335.83	1636.83
24.76_1527.7287n	24.7636	1527.73	6.7809	YPTSPQQPGQGQQL		P10388	2707.28	1424.63	1390.2	0	0	0	11.6727	39.5257	48.4379
29.04_1815.8760n	29.0419	1815.88	6.3274	YLTSPQQSGQGQQPGQL		P10388	3224.74	2413.68	2377.34	2764.06	2578.04	3122.58	1737.79	2359.87	2605.73
34.98_2036.8870n	34.9821	2036.89	6.2916	YYPTSPQESGQGQQPGQW		P10388	905.673	0.964924	395.459	325.292	2555.17	696.849	2449.3	1676.24	4972.89
10.69_2157.0106n	10.6931	2157.01	6.2425	SGQGQRPGQWLQPGQGQQGY	[3] Deamidation Q	P10388	617.055	406.981	427.35	1143.35	478.314	481.392	512.765	315.194	488.517
38.60_1099.5175n	38.5977	1099.52	5.7489	SGQGQRPGQW		P10388	169.125	159.777	395.282	614.46	699.052	440.827	822.61	674.086	574.24
10.59_1873.8302n	10.5917	1873.83	5.8091	YPTSPQESGQGQQPGQW		P10388	332.708	448.32	438.117	50.0097	115.772	32.9362	131.897	178.799	128.432
10.81_1873.7986n	10.8143	1873.8	5.8091	YPTSPQESGQGQQPGQW		P10388	94.1988	312.398	82.6649	756.126	859.197	286.927	115.52	129.882	80.7372
26.09_2240.0175n	26.0882	2240.02	5.9425	YPTSLQQTGQGQQSGQGQQGY		P10388	286.682	31.3054	0	271.295	193.99	163.663	128.964	155.129	49.289
26.78_1214.5943n	26.7842	1214.59	7.7111	YPTSPQQPGQL		P08489	115083	110791	114903	13449.6	6277.15	5313.35	26311.8	33014.7	32913.4
26.85_1214.6003n	26.8518	1214.6	7.7111	YPTSPQQPGQL		P08489	201937	279922	291571	74937	56483.8	70917.4	117034	134806	130008
34.22_1354.6443n	34.2185	1354.64	7.5008	YPSVTSPQQVSY		P08489	40553.2	52152.2	45720.4	400326	384682	334135	39889.5	40291.9	43578.2
28.84_1215.5830n	28.839	1215.58	7.1991	YPTSPQQPGQL	[6] Deamidation Q	P08489	59254.8	72020.1	89388	65523.1	40239.1	41842.9	44994.3	45063.3	45058.5
28.41_1215.5784n	28.4135	1215.58	6.9202	YPTSPQQPGQL	[10] Deamidation Q	P08489	3725.21	3339.13	4604.62	0	0	23.949	232.346	466.193	309.975
28.91_1215.5769n	28.9066	1215.58	7.1991	YPTSPQQPGQL	[6] Deamidation Q	P08489	8648.47	6223.17	9513.73	343.113	71.5678	0	1383.35	1945.03	1879.4
17.33_2998.3685n	17.3296	2998.37	7.9617	YPGQASPQRPGQGQQPGQGQQSGQGQQGY		P08489	0	0	0	79919	46061.8	69646.4	0	0	0
17.33_2998.3646n	17.3296	2998.36	7.9617	YPGQASPQRPGQGQQPGQGQQSGQGQQGY		P08489	711.347	786.632	665.612	25059.6	19359.1	34030.2	142.143	263.989	268.854
22.41_1517.7179n	22.405	1517.72	6.4146	YPTSPQQSGQGQQL		P08489	23164.1	31069.6	32943.6	9121.79	8119.16	15359.5	11950.5	13380.9	12958.8
21.71_2843.3694n	21.709	2843.37	6.3485	AQGQQGQQPAQVQQGQQPAQGQQGQQL		P08489	23799	16833.9	28875.5	40477.3	31112.8	36429.8	18850.8	16462.9	18551.4
21.91_2843.3485n	21.9119	2843.35	5.6227	AQGQQGQQPAQVQQGQQPAQGQQGQQL		P08489	12982.2	8921.19	11672.2	7719.92	18142.8	18747.7	9757.16	8883.34	11820.2
36.68_2835.2392n	36.6787	2835.24	6.5962	QPGQGQQGYYPTSPQQSGQGQQLGQW	[21] Deamidation Q|[22] Deamidation Q|[25] Deamidation Q	P08489	3671.23	2066.17	1881.73	6932.68	20599.5	5216.53	17305.7	23288.2	19173.9
35.15_2327.0813n	35.1514	2327.08	7.2528	QQPEQGQPGYYPTSPQQPGQL		P08489	4400.56	4513.94	4760.74	43765.4	25661.8	27362.5	3615.36	4768.39	4410.57
35.22_2327.0817n	35.219	2327.08	7.2528	QQPEQGQPGYYPTSPQQPGQL		P08489	0	0	0	21682.4	15800.9	9953.47	0	0	0
17.86_2999.3587n	17.8566	2999.36	7.1398	YPGQASPQRPGQGQQPGQGQQSGQGQQGY	[20] Deamidation Q	P08489	0	137.862	55.3667	11783	28129.5	42829.2	0	0	0
18.06_2999.3556n	18.0595	2999.36	6.7657	YPGQASPQRPGQGQQPGQGQQSGQGQQGY	[21] Deamidation Q	P08489	0	0	0	1367.12	1484.18	1059.11	0	0	0
17.89_2999.3486n	17.8904	2999.35	7.1398	YPGQASPQRPGQGQQPGQGQQSGQGQQGY	[20] Deamidation Q	P08489	892.611	1134.51	1221.3	2148.61	10023.9	15385.2	923.109	893.771	710.209
16.53_1083.4652n	16.532	1083.47	7.2384	QSGQGQPGYY		P08489	41.7285	146.224	327.25	15244.7	9536.32	9540.1	12.9887	9.39903	43.3698
36.75_3904.8514n	36.7463	3904.85	5.8724	QQPAQGQQPGQGQQGRQPGQGQPGYYPTSSQLQPGQL	[33] Deamidation Q	P08489	871.399	934.966	760.937	9851.01	3968.97	4731.49	964.558	1306.14	681.167
32.73_2574.2086n	32.725	2574.21	7.015	LQPGQGQQGYYPTSPQQSGQGQQL		P08489	0	0	0	4225.82	4833.8	1811.02	0	0	0
32.83_2574.2168n	32.8265	2574.22	7.015	LQPGQGQQGYYPTSPQQSGQGQQL		P08489	2060.52	2206.95	2612.68	18033.7	16592.3	15121.5	538.471	1406.91	686.714
42.35_3904.8693n	42.3484	3904.87	6.3192	QQPAQGQQPGQGQQGRQPGQGQPGYYPTSSQLQPGQL	[8] Deamidation Q	P08489	31.4005	0	0	3487.46	3264.99	1203.14	1263	2845.2	2263.85
36.24_3903.8622n	36.2391	3903.86	6.8499	QQPAQGQQPGQGQQGRQPGQGQPGYYPTSSQLQPGQL		P08489	264.505	0	0	6790.88	4302.39	2282.43	651.826	541.026	873.781
36.78_3905.8633n	36.7801	3905.86	6.4665	QQPAQGQQPGQGQQGRQPGQGQPGYYPTSSQLQPGQL	[1] Deamidation Q|[11] Deamidation Q	P08489	112.911	0	30.2969	2687.85	1177.12	93.8314	0	0	64.9645
36.44_1355.6253n	36.442	1355.63	6.6828	YPSVTSPQQVSY	[8] Deamidation Q	P08489	0	0	0	1550.14	1738.56	443.799	0	0	0
35.78_2328.0678n	35.7798	2328.07	6.5704	QQPEQGQPGYYPTSPQQPGQL	[1] Deamidation Q	P08489	0	0	0	2422.69	1669.9	334.337	0	0	0
43.59_2103.0532n	43.5854	2103.05	7.7865	EQTVVPPKGGSFYPGETTPL		A0A1D5SVW4	1.82116e+06	1.83074e+06	1.72227e+06	1.9e+06	1.9255e+06	1.60491e+06	1.52327e+06	1.64746e+06	1.5298e+06
13.84_1254.5729n	13.8351	1254.57	7.6116	HVSAEQQAASPM		A0A1D5SVW4	268126	333354	344656	100057	268022	266689	269832	274281	267207
20.36_1344.6467n	20.362	1344.65	7.2386	EACRQVVDQQL	[3] Carbamidomethyl C	A0A1D5SVW4	512707	524545	564787	434632	419717	418561	354009	391900	343290
11.98_1270.5647n	11.9837	1270.56	7.316	HVSAEQQAASPM	[12] Oxidation M	A0A1D5SVW4	99832.7	113484	118978	136210	103460	101886	95213.1	106003	105187
20.25_1377.6304n	20.2493	1377.63	7.6578	QCERELQESSL	[2] Carbamidomethyl C	A0A1D5SVW4	304245	313469	322411	316955	324183	331781	240786	258876	231873
20.25_1377.6209n	20.2493	1377.62	7.4169	QCERELQESSL	[2] Carbamidomethyl C	A0A1D5SVW4	10006.8	5203.65	6206.8	24719.5	4602.15	3146.03	3388.4	3488	3159.86
42.01_1787.8061n	42.013	1787.81	6.0923	QQGIFWGTSSQTVQGY	[1] Deamidation Q|[14] Deamidation Q	A0A1D5SVW4	759442	799995	894661	816351	987499	756225	573819	796775	689364
32.66_742.3550n	32.6574	742.355	6.9843	YYPTSL		A0A1D5SVW4	165372	140710	134460	172154	161687	117148	120201	128173	115823
21.11_1310.6242n	21.1144	1310.62	6.0933	YPGVTSPRQGSY		P10387	3152.72	1077.12	1941.66	0	0	0	472.314	418.84	385.623
21.24_1310.6320n	21.2356	1310.63	6.9183	YPGVTSPRQGSY		P10387	394372	375500	428215	148975	88668	105885	309684	320595	309178
21.08_1594.7568n	21.0806	1594.76	7.5924	QQPGQGQQGHYPASL		P10387	145004	136563	150685	124077	121275	128413	94224	106873	97920.4
21.08_1594.7627n	21.0806	1594.76	7.5924	QQPGQGQQGHYPASL		P10387	47714	53584.1	56506.3	31989.1	43789	51639.4	34437.6	38718.7	36011.5
11.53_3522.6536n	11.5273	3522.65	6.715	QQPGQGQPGQRQQPGQGQHPEQGKQPGQGQQGY		P10387	87496.7	111390	141854	1012.45	869.863	1124.22	57550.2	76301.6	82845.5
12.51_3522.6150n	12.5107	3522.61	6.571	QQPGQGQPGQRQQPGQGQHPEQGKQPGQGQQGY		P10387	15258.1	20220.4	25235	32141.6	35316.4	52248.3	11192.1	14121.6	14404.3
12.75_3522.6163n	12.7474	3522.62	6.571	QQPGQGQPGQRQQPGQGQHPEQGKQPGQGQQGY		P10387	1941.59	2478.21	1959.39	20713.6	11315.1	9585.19	1763.38	2649.63	3100.77
32.94_2262.0979n	32.9448	2262.1	7.4636	QQPGQGQQIGKGQQGYYPTSL		P10387	142319	119676	113643	48141.6	44495	22773.6	118909	119408	120505
35.15_2156.0295n	35.1514	2156.03	7.4077	YPTSLQQPGQGQQGHYPASL		P10387	88638.2	69230.8	71207.5	77970.5	69473.7	58800.4	73771.3	74233.8	70831.3
38.67_960.5025n	38.6653	960.502	6.8028	QQLQQGIF		A0A1D5SVW4	35175.8	18675.6	17666.2	18538.9	28761.9	14714.3	28995.1	29014	27495.1
38.67_960.5029n	38.6653	960.503	6.8028	QQLQQGIF		A0A1D5SVW4	43319.2	47693.3	49414.9	39614.8	35641.5	38296.6	37957.5	36659.9	40435.5
22.54_1345.6324n	22.5403	1345.63	6.403	EACRQVVDQQL	[3] Carbamidomethyl C|[10] Deamidation Q	A0A1D5SVW4	96827.9	111791	133405	134001	87145.8	80402.8	74435.5	79710.4	71924.3
24.26_1345.6290n	24.2564	1345.63	5.9579	EACRQVVDQQL	[3] Carbamidomethyl C|[5] Deamidation Q	A0A1D5SVW4	23970.4	27798.3	31872.1	32611.1	22293	20201.2	18142	19582.8	19366.1
22.90_1345.6335n	22.8982	1345.63	6.251	EACRQVVDQQL	[3] Carbamidomethyl C|[9] Deamidation Q	A0A1D5SVW4	321.833	48.3985	311.333	1969.28	176.514	18.0797	59.5062	26.3497	24.2339
28.91_876.4245n	28.9066	876.425	6.6764	YPGETTPL		A0A1D5SVW4	29485.8	30954.1	30289.6	25696.5	15863.2	11349.9	9696.35	14221.1	11055.8
35.54_1408.6629n	35.5431	1408.66	7.3287	QQGYYPTSPQQL		P10387	6882.38	3613	2896.15	0	161.286	0	4998.36	5984.9	5928.18
35.58_1408.6761n	35.5769	1408.68	7.3287	QQGYYPTSPQQL		P10387	82111.5	88929.5	89913.9	63994.8	45006.1	46386.4	71948.8	74196.1	78113.6
14.90_1026.4622n	14.9033	1026.46	6.6232	GTSSQTVQGY		A0A1D5SVW4	15975.2	19754.3	20988.8	18547.5	15360.6	13440.7	14838.5	16571.9	17146.2
46.00_2025.0235n	45.9978	2025.02	7.0585	EACRQVVDQQLAGRLPW	[3] Carbamidomethyl C	A0A1D5SVW4	43770	30610.6	34675.2	52149.9	89558	66097.9	90417.6	62052.4	106513
46.03_2025.0202n	46.0316	2025.02	7.0585	EACRQVVDQQLAGRLPW	[3] Carbamidomethyl C	A0A1D5SVW4	3459.43	160.943	867.458	672.389	9036.12	3677.38	2915.2	4912.16	3848.31
20.54_2823.2750n	20.5396	2823.28	7.3639	QQSGQGQQGHYPTSLQQPGQGQQGHY		P10387	41759.4	20094	27202.5	17226	49350	46972	46833	35636.5	42030.2
13.84_1700.8221n	13.8351	1700.82	7.0153	QQPGQGQQIGKGQQGY		P10387	18864.7	20079	22463	729.325	120.724	57.8633	16472.2	17162.8	17748.2
12.41_2757.2398n	12.4093	2757.24	5.863	QHTGQRQQPVQGQQPEQGQQPGQW	[8] Deamidation Q|[11] Deamidation Q|[17] Deamidation Q	P10387	18393.2	22376.5	18758.9	17339.9	10712.6	16088.8	13239.9	11776.6	12968.8
12.41_2757.2549n	12.4093	2757.25	5.863	QHTGQRQQPVQGQQPEQGQQPGQW	[8] Deamidation Q|[11] Deamidation Q|[17] Deamidation Q	P10387	20268.6	22592.3	21377.1	18861.7	14915.7	18808.4	12068.1	14763.5	12800.5
24.95_1244.6335n	24.9524	1244.63	5.8425	EQTVVPPKGGSF		A0A1D5SVW4	22266.1	26152.7	25945.6	29967.3	17155.8	16930.8	15984	16086.8	14706.1
25.12_1244.6332n	25.1214	1244.63	5.9587	EQTVVPPKGGSF		A0A1D5SVW4	4678.48	10610.9	12618.2	3831.62	2561.19	4043.32	1509.22	3298.92	2307.82
35.92_1650.7731n	35.915	1650.77	6.4437	QQPGQGQQGYYPTSL		P10387	5455.88	6104.97	5870.83	7458.47	5096.91	7362.38	7298.5	5441.79	5514.71
52.94_1650.7597n	52.9387	1650.76	6.5131	QQPGQGQQGYYPTSL		P10387	33278.2	28439.3	25429.9	39104.1	30134.6	27356.7	25035.5	26449.3	25479.4
46.54_2212.0654n	46.5388	2212.07	6.9369	YPTSLQQPGQGQQGYYPTSL		P10387	6727.91	6384.66	3662.75	2874.56	2425.73	1233.27	7815.88	10935.2	8092.7
34.27_2277.0504n	34.2692	2277.05	7.095	QQPGQGQQQGQGQQGYYPTSL		P10387	50939.4	50808.5	44977.6	45132.7	38327.7	37283.7	39324	44688.2	40910.5
24.76_4530.9624n	24.7636	4530.96	6.5985	YPTSVQQPGQGQQSGQGQQSGQGHQPGQGQQSGQEQQGYDSPY		P10387	20858.8	22553.7	22261.2	45.3253	38.0162	40.636	9563.78	12254.6	11599.2
62.63_3335.5329n	62.6297	3335.53	6.3451	QQPGQGQQIGKGQQGYYPTSLQQPGQGQQGY	[1] Deamidation Q|[22] Deamidation Q	P10387	4613.31	3371.68	3396.27	9822.02	8155.13	32972.7	12708	6148.4	7371.03
62.70_3335.5468n	62.6973	3335.55	6.3451	QQPGQGQQIGKGQQGYYPTSLQQPGQGQQGY	[1] Deamidation Q|[22] Deamidation Q	P10387	2201.72	1100.91	1137.02	9964.63	10414.9	41778.9	4831.32	2364.37	4245.7
41.92_2823.3837n	41.9228	2823.38	6.5344	YPTSLQQPGQGQQIGKGQQGYYPTSL		P10387	15693.1	7310.66	9689.68	815.596	865.444	545.524	25229.6	22394.1	22767.9
38.50_2704.2589n	38.4962	2704.26	6.3806	QCERELQESSLEACRQVVDQQL	[2] Carbamidomethyl C|[14] Carbamidomethyl C	A0A1D5SVW4	9260.4	4270.65	4493.1	12170.7	15874.9	19042	19011.5	12702	18349.5
10.95_2825.3445n	10.9496	2825.34	5.7048	YPTSLQQPGQGQQIGKGQQGYYPTSL	[7] Deamidation Q|[12] Deamidation Q	P10387	3140.23	3939.43	3772.52	8996.26	6476.12	5049	3411.91	6334.73	6455.98
33.79_1624.7524n	33.793	1624.75	5.545	QQPGQGQQGHYPTSL		P10387	9082.37	9881.01	10251.5	13888.2	11706.5	9230.38	7492.39	8255.15	9981.7
26.75_2246.0349n	26.7504	2246.03	7.1234	YPTSPQQPGQGQQLGQGQQGY		A0A1D5SVW4	19352.5	30460.3	28819.9	2745.7	4309.05	7611.75	8205.51	11354.7	11524
15.99_2826.3309n	15.991	2826.33	5.7673	YPTSLQQPGQGQQIGKGQQGYYPTSL	[6] Deamidation Q|[7] Deamidation Q|[12] Deamidation Q	P10387	6895.49	2809.61	8624.62	0	0	0	17440.9	12998.1	21230.1
27.75_2262.1108n	27.751	2262.11	6.934	YPTSLQQPGQGQQIGKGQQGY		P10387	8268.37	3123.71	3270.2	85.7395	442.367	110.44	4949.98	4919.42	4639.46
17.06_1083.5348n	17.059	1083.53	5.6005	GQGQQPRQW		P10387	2278.68	5656.53	6431.04	2977.43	3418.96	1899.34	479.568	1527.3	1143.02
11.12_863.3794n	11.1187	863.379	6.0762	RCCQQL	[2] Carbamidomethyl C|[3] Carbamidomethyl C	A0A1D5SVW4	917.956	1218.27	1074.43	0	1172.01	4128.02	632.472	1113.25	339.294
29.18_1212.5409n	29.1771	1212.54	6.5458	WGTSSQTVQGY		A0A1D5SVW4	2989.71	242.202	460.193	977.416	2226.77	1411.95	2766.88	1598.02	3604.92
23.76_5750.6442n	23.7632	5750.64	6.3978	QQPGQGQPGQRQQPGQGQHPEQGKQPGQGQQGYYPTSPQQPGQGQQLGQGQQGY		P10387	13981.5	4731.62	6712.93	343.218	426.256	26.9233	8893.7	8245.12	11753.9
26.82_5666.5638n	26.818	5666.56	5.5842	YPTSPQQPGQGQQPGQGQQGHCPTSPQQSGQAQQPGQGQQIGQVQQPGQGQQGY	[10] Deamidation Q|[22] Carbamidomethyl C	P10387	4839.78	9431.39	8483.27	5.94565	0	0	1571.15	2476.65	2289.11
23.93_1786.8142n	23.9323	1786.81	6.2282	QQGIFWGTSSQTVQGY	[11] Deamidation Q	A0A1D5SVW4	10659.7	9535.34	9967.23	9884.55	4334.56	5515.9	4610.37	5997.92	5648.41
24.17_1786.8244n	24.169	1786.82	6.2282	QQGIFWGTSSQTVQGY	[11] Deamidation Q	A0A1D5SVW4	1426.68	2757.81	2832.53	1962.71	1502.34	1366.61	1488.43	1527.15	1623.58
24.80_2037.9611n	24.7974	2037.96	6.9767	YPGQASPQQPGQGQQPGKW		A0A1D5SVW4	1799.46	401.332	937.532	433.476	2396.77	1986.19	2272.39	1790.56	4489.45
36.05_2157.0127n	36.0503	2157.01	6.4532	YPTSLQQPGQGQQGHYPASL	[10] Deamidation Q	P10387	3577.12	1371.49	1839.13	2261.63	3818.74	1522.43	2803.24	2425.5	2535.85
36.58_2157.0129n	36.5772	2157.01	6.4288	YPTSLQQPGQGQQGHYPASL	[6] Deamidation Q	P10387	2078.69	623.927	1014.38	1587.04	2148.42	856.81	1713.13	1348.4	1337.25
14.70_1701.8034n	14.7004	1701.8	6.2623	QQPGQGQQIGKGQQGY	[8] Deamidation Q	P10387	5988.23	6595.47	8739.4	674.666	77.5207	210.647	5107.55	4696.22	5117.87
32.13_5149.3664n	32.1305	5149.37	5.5806	QQLGQGQQTGQPGQKQQPGQGQQTGQGQQPEQEQQPGQGQQGYYPTSL	[35] Deamidation Q	P10387	4547.48	4326.24	4359.4	0	1.68855	0	4386.56	3838.66	4486.16
32.16_5149.3962n	32.1643	5149.4	5.5806	QQLGQGQQTGQPGQKQQPGQGQQTGQGQQPEQEQQPGQGQQGYYPTSL	[35] Deamidation Q	P10387	4551.4	3451.63	2743.33	0	0	0	3783.58	3524.14	4397.62
11.85_1089.4840n	11.8485	1089.48	6.7141	QQPGQGQQGY		P10387	1024.1	1859.93	1934.33	57.1986	131.638	89.9604	608.327	727.614	744.671
32.16_2319.0801n	32.1643	2319.08	6.6515	GTSSQTVQGYYPGVTSPRQGSY		P10387	2705.85	1028.1	826.62	0	0	0	4390.73	2370.45	3231.8
36.97_2425.1661n	36.9689	2425.17	6.4017	YYPTSLQQPGQGQQIGKGQQGY		P10387	3071.21	1164.2	179.962	21.7275	0	0	2337.37	2711.94	2440.01
35.08_2278.0242n	35.0836	2278.02	5.9662	YPTSLQQPGQGQQQGQGQQGY	[12] Deamidation Q	P10387	2966.56	1161.56	1344.54	3089.54	3023.12	1343.09	2456.95	2633.26	2345.85
17.09_2505.1210n	17.0928	2505.12	5.7656	WGTSSQTVQGYYPGVTSPRQGSY		P10387	1499.47	2038.2	1978.27	1913.46	2288.16	2528.56	460.677	562.695	687.711
39.63_3853.7933n	39.6318	3853.79	6.1249	QQPGQGQQQGQGQQGYYPTSLQQPGQGQQGHYPASL		P10387	76.7254	0	0	354.261	2124.44	0	238.986	195.766	112.182
11.12_2754.3120n	11.1187	2754.31	5.5537	QHTGQRQQPVQGQQPEQGQQPGQW		P10387	115.891	306.083	204.257	42.7713	76.565	171.718	137.262	130.344	113.969
28.81_3333.5212n	28.8052	3333.52	6.0079	YPGVTSPRQGSYYPGQASPQQPGQGQQPGKW	[9] Deamidation Q|[16] Deamidation Q|[26] Deamidation Q	P10387	53.5397	178.078	264.473	21.5193	43.3503	155.263	139.292	104.856	103.664
32.03_987.5004n	32.029	987.5	7.4792	MCRVNVPL	[2] Carbamidomethyl C	B2Y2Q1	332832	388151	372309	108176	80807.5	75591	252996	288492	277173
15.94_616.3360n	15.9375	616.336	7.9281	RTLPM		B2Y2Q1	109454	165151	204729	82269.3	71767.2	66002.4	91343.5	116185	105433
21.91_779.3825n	21.9119	779.383	7.1743	GVGTGVGAY		P10386	134135	148734	213551	41239.5	26278.6	27573.6	181203	204041	179035
36.75_1150.5640n	36.7463	1150.56	7.6341	MCRVNVPLY	[2] Carbamidomethyl C	B2Y2Q1	160427	176627	200651	79788.2	56157.8	50951.9	130853	148950	139248
37.15_2791.4536n	37.1549	2791.45	8.101	SIVLQEQQQVRGSIQTQQQQPQQL		B2Y2Q1	135294	96712	136545	7730.17	4742.1	2022.37	87647.1	100111	112436
37.14_2791.4553n	37.138	2791.46	8.101	SIVLQEQQQVRGSIQTQQQQPQQL		B2Y2Q1	167033	170178	148635	144818	137036	117275	198369	211433	208803
27.09_1003.4949n	27.0888	1003.49	6.5855	MCRVNVPL	[1] Oxidation M|[2] Carbamidomethyl C	B2Y2Q1	63781.9	70251.6	80748.8	30529.7	37917	42407.5	44791.9	54296.2	46129.8
43.31_2721.3229n	43.3149	2721.32	7.7041	SQQQQQQPILPQQPSFSQQQQQL		B2Y2Q1	55675.1	95455.2	89894	26516.1	25157.6	22085	20529.1	26473.7	20921.9
43.35_2721.3405n	43.3487	2721.34	7.7041	SQQQQQQPILPQQPSFSQQQQQL		B2Y2Q1	10638.5	11136.9	8977.42	1466.59	1404	203.987	1102.44	1003.07	1358.5
54.47_4324.1530n	54.466	4324.15	6.988	SQQQQPVLPQQPPFSQQQQQQPILPQQPSFSQQQQQL		B2Y2Q1	15713.6	21638.9	20848.4	245.362	58.3638	0	894.401	1156.29	701.609
39.96_4516.2484n	39.9559	4516.25	7.1279	SIVLQEQQQVRGSIQTQQQQPQQLGQCVSQPQQQSQQQL	[27] Carbamidomethyl C	B2Y2Q1	3269.45	1261.6	2484.46	0	0	0	4837.9	4134.69	6429.91
20.81_2379.1750n	20.8101	2379.18	6.8472	QEQQQVRGSIQTQQQQPQQL		B2Y2Q1	2829.69	3455.26	3766.47	219.475	227.696	104.879	1019.86	1229.18	1175.03
57.76_4327.1084n	57.7575	4327.11	6.7099	SQQQQPVLPQQPPFSQQQQQQPILPQQPSFSQQQQQL	[2] Deamidation Q|[26] Deamidation Q|[32] Deamidation Q	B2Y2Q1	1804.85	1245.13	2521.27	1147.35	2237.85	1295.47	71.8196	18.7194	79.8571
21.25_1017.5593n	21.2525	1017.56	6.0589	VEAKGPRVY		A0A1D5XGF3	122900	112495	133174	82214.4	93296.7	118697	93100	98141.6	93705.8
34.42_1289.6271n	34.4214	1289.63	6.2471	VRDVGASDPDIF		A0A1D5XGF3	877.01	249.237	117.409	239.053	410.184	60.4372	253.175	271.73	220.157
34.62_1289.6357n	34.6243	1289.64	6.2471	VRDVGASDPDIF		A0A1D5XGF3	183673	221499	205153	263429	231083	241288	182067	168779	159928
14.39_865.5021n	14.3933	865.502	5.8254	KLVHEAGL		A0A1D5XGF3	49782.1	49356.6	55544.7	43112.5	40981.5	42219.3	39351	44441.2	38730.3
21.24_1187.6668n	21.2356	1187.67	6.4426	GLVEAKGPRVY		A0A1D5XGF3	208483	163710	204984	139027	150861	175577	140905	147222	142125
49.14_2948.3603n	49.1372	2948.36	6.7485	TCAEMRDSEQSSQARSAPEELVQQVL	[2] Carbamidomethyl C	A0A1D5XGF3	174496	110129	125434	183180	140629	222011	192810	124637	162857
36.76_1756.7527n	36.7632	1756.75	6.3107	VGHPEWEFPHDSGTY		A0A1D5XGF3	32169.3	13816.3	21063.7	41100.3	43634.8	51555.2	51323.2	36354.4	60910.9
48.00_2356.1545n	47.9987	2356.15	5.7514	RDSEQSSQARSAPEELVQQVL		A0A1D5XGF3	135955	153872	151701	247036	190210	199803	117255	141794	121800
48.00_2356.1585n	47.9987	2356.16	5.7514	RDSEQSSQARSAPEELVQQVL		A0A1D5XGF3	29795.1	22502.1	13258.3	71156.1	65945.4	54107.1	24891.6	30619.7	25389.1
37.90_2300.0341n	37.9016	2300.03	5.9009	KAAAAMVGHPEWEFPHDSGTY		A0A1D5XGF3	15353.3	11170.4	10865.3	19403.5	25718.2	30853.7	31014.7	21591.5	30976.6
37.90_2300.0511n	37.9016	2300.05	5.9009	KAAAAMVGHPEWEFPHDSGTY		A0A1D5XGF3	14662.3	13885.3	17118	9032.58	17809.9	18263	22213.7	13812.8	20062.9
19.38_1106.6784n	19.384	1106.68	5.5565	KLVHEAGLKL		A0A1D5XGF3	7882.49	4300.73	4538.07	11564.3	5882.1	5598.55	4850	3363.55	3814.19
19.42_1106.6798n	19.4178	1106.68	5.5565	KLVHEAGLKL		A0A1D5XGF3	9186.78	7144.37	5903.25	8334.69	9133.66	9372.55	7155	5379.72	5823.95
77.46_3074.3229n	77.464	3074.32	5.738	GGIGGGEVEGPTGGMGGEVQDPTGGMGGELPATM	[34] Oxidation M	A0A1D5XGF3	17.4493	22.2014	1.34972	1392.29	1744.7	254.351	68.1617	43.8487	41.1946
53.44_1447.8418n	53.4431	1447.84	8.748	VQQQIPVVQPSIL		P10386	864537	1.04832e+06	1.09576e+06	1.21901e+06	1.44448e+06	976905	1.08146e+06	1.24449e+06	1.09322e+06
52.70_1498.7980n	52.702	1498.8	7.5055	RILPTMCSVNVPL	[7] Carbamidomethyl C	P10386	6817.63	5629.72	6403.7	9659.14	35925.3	13077.9	13879.2	11553	11282.3
52.74_1498.8013n	52.7358	1498.8	7.5055	RILPTMCSVNVPL	[7] Carbamidomethyl C	P10386	203161	168146	189489	273727	441639	282403	257681	238031	222380
49.39_3857.9562n	49.3908	3857.96	7.9301	VLPQQPPFSQQQQPVLPPQQSPFPQQQQQHQQL		P10386	449064	551184	902040	45826.3	111972	67589.4	1.90775e+06	2.13251e+06	2.02377e+06
26.31_2220.1048n	26.308	2220.1	7.8213	SQEQPLPQQQPSVEEKQQL		A0A1D5T3T7	141903	144049	144200	97867.2	141731	133890	175635	189941	178501
45.67_2763.4032n	45.6737	2763.4	8.452	SIILQEQQQVQGSIQSQQQQPQQL		P10386	373484	326106	390812	587989	711919	661736	337875	404454	371887
55.13_2944.4769n	55.1285	2944.48	8.262	QQQPPFSQQQPILPQQPPFSQQQQL		P10386	315131	315131	338884	264799	309283	235322	207770	290347	234992
54.65_1661.8649n	54.652	1661.86	8.0248	RILPTMCSVNVPLY	[7] Carbamidomethyl C	P10386	63499.9	47881.1	63748.1	89027.5	188427	82763.2	91520.3	80905.2	51969
42.72_1873.9614n	42.7203	1873.96	7.5273	QQQPLPPQQTFPQQPL		P10386	188193	272636	271979	269318	396465	267780	220235	266503	216846
48.53_2219.1300n	48.5257	2219.13	8.33	SQQQPILPQQPPFSQQQQL		P10386	213599	271710	214091	241803	207727	201106	126485	216634	170562
39.43_924.5047n	39.4289	924.505	7.4113	VLPQQPPF		P10386	79990	99505.7	88803.3	103684	67195.9	72234.7	47220.3	70186.8	55521.4
43.59_1514.7924n	43.5854	1514.79	6.7601	RILPTMCSVNVPL	[6] Oxidation M|[7] Carbamidomethyl C	P10386	22344	20140.4	28011	14932.4	29668.5	22057.4	11908.6	9909.61	13113.1
16.46_1661.7950n	16.4644	1661.79	6	FPQQPSFSQQQPPF		P10386	19508.3	28343	38884.7	18663.9	26164.3	27410.7	33960.5	40028.7	40868.9
18.30_2951.4522n	18.299	2951.45	6.2194	SQQQQPVLPPQQSPFPQQQQQHQQL		P10386	18883.2	16723.1	16435.2	3866.85	8512.95	9004.61	9152.1	8921.34	12280.2
48.59_2337.1597n	48.5933	2337.16	6.1497	QEQQQVQGSIQSQQQQPQQL		P10386	11472.1	14587.9	16320.9	4154.33	4144.33	13677.8	14344.7	9454.2	15486.5
55.67_1448.8223n	55.6724	1448.82	8.2946	VQQQIPVVQPSIL	[2] Deamidation Q	P10386	8674.1	9149.21	11786.8	25459.9	33436.8	7671.42	15315.5	13997.9	13998.6
54.70_1448.8237n	54.7027	1448.82	7.7934	VQQQIPVVQPSIL	[2] Deamidation Q	P10386	320.953	22.4406	77.3328	1316.33	5256.96	188.656	1342.09	1084.49	479.924
40.46_2245.0716n	40.4631	2245.07	6.7028	LQQQCSPVAMPQRLARSQM	[2] Deamidation Q|[5] Carbamidomethyl C|[10] Oxidation M	P10386	21786.7	20599.3	22528.7	23258.1	22226.2	22010.2	26686.4	24976.3	25488.3
46.76_4488.2032n	46.7617	4488.2	7.4702	SIILQEQQQVQGSIQSQQQQPQQLGQCVSQPQQQSQQQL	[27] Carbamidomethyl C	P10386	10393.6	3035.49	8648.26	31328.9	63033.3	58394.3	14180.2	10755.6	17377.8
46.83_4488.2200n	46.8293	4488.22	7.4702	SIILQEQQQVQGSIQSQQQQPQQLGQCVSQPQQQSQQQL	[27] Carbamidomethyl C	P10386	2807.84	556.749	778.557	3660.41	16461.4	8773.62	3744.42	2899.1	4750.93
50.02_2220.1132n	50.0192	2220.11	7.4178	SQQQPILPQQPPFSQQQQL	[16] Deamidation Q	P10386	49705.5	52955.2	43946.5	66871.6	68834.9	42928.1	47168.8	72388.4	56786.6
51.11_1964.9403n	51.1069	1964.94	7.6134	FSQQQQQQLFPQQPSF		P10386	10822.7	11201.1	14151.4	3429.54	4742.62	2000.6	24442.1	28930.4	22368.5
38.83_1506.8033n	38.8344	1506.8	6.1304	SQQQPILPQQPPF		P10386	1083.64	415.336	250.908	1251.98	1993.59	1271.14	1790.39	1462.1	1215.32
64.26_5287.7995n	64.2584	5287.8	6.9328	VLPQQPPFSQQQQPVLPPQQSPFPQQQQQHQQLVQQQIPVVQPSIL		P10386	155.26	49.6544	413.129	0	0	0	23896.4	7260.75	13859.3
64.29_5287.7674n	64.2922	5287.77	6.9328	VLPQQPPFSQQQQPVLPPQQSPFPQQQQQHQQLVQQQIPVVQPSIL		P10386	3351.4	1409.97	4259.78	2659.24	1854	1696.24	68195.1	27437.5	42419.4
28.87_729.4212n	28.8728	729.421	7.9314	RILPTM		P10386	2448.23	2725.28	1544.63	3733.8	3410.24	3150.26	2264.54	3274.2	2567.15
57.35_2764.3976n	57.3518	2764.4	6.389	SIILQEQQQVQGSIQSQQQQPQQL	[19] Deamidation Q	P10386	1819.98	2451.04	2168.48	622.599	1031.86	261.143	110.365	198.607	566.593
55.53_3860.8830n	55.5342	3860.88	6.5782	VLPQQPPFSQQQQPVLPPQQSPFPQQQQQHQQL	[12] Deamidation Q|[13] Deamidation Q|[20] Deamidation Q	P10386	0	0	0	19648.3	17394.2	11565.2	7955.13	6658.8	7772.99
56.62_2232.1235n	56.622	2232.12	6.9518	QQQPPFSQQQPILPQQPPF		P10386	3002.99	3557.62	2503.68	3172.94	1873.33	772.191	920.136	2220.25	1484.39
17.89_1133.5487n	17.8904	1133.55	7.3561	FSQQQQQQL		P10386	252.499	367.208	988.608	0	0	0	1024.44	1796.65	1489.38
60.74_5097.4494n	60.7445	5097.45	6.7399	QEQQQVQGSIQSQQQQPQQLGQCVSQPQQQSQQQLGQQPQQQQL	[23] Carbamidomethyl C	P10386	3094.58	1052.19	1164.88	0	0	0	3811.99	3263.55	4195.45
39.46_2442.2234n	39.4627	2442.22	6.901	ERPWQQQPLPPQQTFPQQPL		P10386	443.603	250.222	144.255	62.3988	0	50.8148	525.479	904.761	661.491
60.30_2261.0777n	60.3049	2261.08	6.8832	LQQQCSPVAMPQRLARSQM	[5] Carbamidomethyl C|[10] Oxidation M|[12] Deamidation Q|[19] Oxidation M	P10386	82.8171	0	90.7357	744.476	421.915	382.701	577.623	581.801	630.75
36.20_1339.6614n	36.1987	1339.66	7.4256	IPPHCSTTIAPF	[5] Carbamidomethyl C	P04727	1.72597e+06	1.98209e+06	1.902e+06	2.20331e+06	2.17852e+06	1.6323e+06	2.19556e+06	2.31304e+06	2.10075e+06
34.12_1339.6758n	34.1171	1339.68	6.5771	KFSREEELGVF		A0A1D5T267	37232.5	35697.1	33902.8	29193.3	24342.5	35040.8	45968.4	35575.5	41655.4
14.14_939.4604n	14.1394	939.46	5.9759	HNTHGLVY		A0A1D5T267	110642	146242	154774	50726.4	133742	124680	121186	133830	118805
32.93_1463.6890n	32.9279	1463.69	7.6003	SVNIDDPSRADIY		A0A1D5T267	190708	180728	148348	189215	132838	137525	171246	158303	160306
38.80_1023.5465n	38.8006	1023.55	6.8245	APKFSQSIF		A0A1D5T267	229692	185316	184244	201869	155827	189812	255694	197765	208147
38.80_1023.5394n	38.8006	1023.54	6.8245	APKFSQSIF		A0A1D5T267	13231.6	3463	2891.13	3070.84	7005.36	3811.27	15339.4	9910.56	12030.1
15.09_1762.7917n	15.0893	1762.79	7.3824	TQQREPESYPHTQY		A0A1D5T267	216825	269858	270242	85457.6	150019	158618	204513	214760	204378
26.94_720.3818n	26.9366	720.382	6.93	IIQGSGF		A0A1D5T267	106148	87824.6	84732.3	59209.6	48083.2	71227.1	85245.5	67716.9	74415.7
20.49_998.5502n	20.4889	998.55	7.6153	NRLQASTPL		A0A1D5T267	167513	127116	142732	90393.3	86909.5	122193	148865	129853	122762
57.67_1456.6923n	57.6674	1456.69	7.7255	FYNDGDAPIVAIY		A0A1D5T267	266505	199814	191222	237254	161113	80984.8	235872	199636	211421
34.68_1064.5148n	34.6778	1064.51	6.3548	SREEELGVF		A0A1D5T267	33211.4	17409.4	11558.4	12674.6	18410.4	8211.69	23490.3	26319.7	25354.9
34.78_1064.5206n	34.7793	1064.52	6.3548	SREEELGVF		A0A1D5T267	107444	110563	106110	115863	86015.3	110437	95543.5	99822.5	91471.7
12.78_1367.6910n	12.7812	1367.69	6.8879	ANQLEPRHKEF		A0A1D5T267	185894	186887	180229	121646	156661	179968	196428	190027	189118
57.39_1201.6347n	57.3856	1201.63	7.4385	GALPVDVIANAY		A0A1D5T267	66211.7	37035.1	27876.9	47185.1	33577.7	25194.5	67025.3	50880.5	55792.9
52.67_3067.6329n	52.6682	3067.63	8.5812	LPLSQQQQVGQGSLVQGQGIIQPQQPAQL		M9TGF7	96238.7	94608.3	123034	131499	149402	130456	137737	143345	139770
22.83_1382.7118n	22.8305	1382.71	6.8803	VQVVNDHGRNVF		A0A1D5T267	131809	112126	123562	150106	90443.8	128559	104550	98895.8	96873
34.81_869.3929n	34.8131	869.393	6.6106	VFDVNNY		A0A1D5T267	139967	104328	104257	105378	74024	92985.5	120370	105052	112222
13.24_1622.7632n	13.2405	1622.76	7.5772	GQSQSVQGQSQSQKF		A0A1D5T267	69147	71452.4	71331.8	110417	78784.8	101384	79271.6	71241.5	78008.7
15.51_945.5043n	15.5148	945.504	6.5189	SATRVHLY		A0A1D5T267	50945.7	54859.8	54522.6	13130.6	40896.6	46792.2	56351.8	46726.2	50900.4
40.55_859.4740n	40.5476	859.474	7.0575	LIIPQNY		A0A1D5T267	55078.4	42756	34875.4	46026	39721.2	40351.4	61884	55059.3	56812.7
49.68_905.4969n	49.681	905.497	7.3191	SGFDVRLL		A0A1D5T267	69296.9	56967.8	54160.6	52183.3	33652.6	58117.9	63401.5	61084.3	60586.6
53.12_998.5761n	53.1246	998.576	7.1719	DVRLLAEAL		A0A1D5T267	59534.2	46851.4	46671.8	43901.9	31709.1	37792.6	55315.4	45489.3	45943
24.76_1047.4840n	24.7636	1047.48	6.9235	NINAHSVMY		A0A1D5T267	65190.4	49275.1	54677.1	30958	33641.3	44092.3	52506.7	47153.1	47900.6
41.18_1040.4311n	41.176	1040.43	7.2473	SFPGCPETF	[5] Carbamidomethyl C	A0A1D5T267	166833	122310	107249	117562	97369.8	99224.4	151240	133294	135575
41.55_2043.9619n	41.5509	2043.96	6.1527	QKYGQSQSVQGQSQSQKF	[1] Deamidation Q|[16] Deamidation Q	A0A1D5T267	70384.3	86140.3	73245.7	58057.5	51240.3	35187.6	56165.4	81027.5	67557.7
55.42_1281.5706n	55.4159	1281.57	7.2818	AGLSFPGCPETF	[8] Carbamidomethyl C	A0A1D5T267	49463.1	31945.2	32957.7	43674.9	23479.1	32933.7	43637.8	32859.6	35166.8
31.81_1526.8766n	31.8092	1526.88	6.6855	LAEALGTSGKIAQRL		A0A1D5T267	29205.8	20029.9	18538.8	15548.3	11802.5	18989.5	29406.3	18779.8	18139
78.86_1503.7736n	78.856	1503.77	6.8887	NSQTFPILNIVQM		A0A1D5T267	55305.7	47594.4	38363.9	83761	69467.6	92912.9	75167	60176.4	69223.2
18.89_831.3899n	18.8909	831.39	6.5536	HSSQNIF		A0A1D5T267	22922	12555.2	15812.5	13837.6	6758.41	10984.5	12179.2	12465.7	11666.9
59.91_613.3440n	59.9132	613.344	6.2767	SPGQLL		A0A1D5T267	13134.1	8934.77	8832.85	11321.3	6262.22	10160.5	10046.4	8687.81	9420.14
47.13_766.3938n	47.1336	766.394	5.5621	AATSFASL		A0A1D5T267	9719.8	8989.29	6799.43	11429	8644.72	9101.56	8147.59	7464.73	6966.34
37.22_2576.2078n	37.2225	2576.21	6.1973	QKQFQKYGQSQSVQGQSQSQKF	[5] Deamidation Q|[9] Deamidation Q|[11] Deamidation Q	A0A1D5T267	79370.5	70437.2	82146.9	71843.8	108679	65231.9	64355.2	88768.8	76371.4
38.31_792.4146n	38.3074	792.415	6.5476	SGFDVRL		A0A1D5T267	11212.6	11861.1	12518.6	9497.11	7382.88	8150.87	10939.2	10576.9	9489.3
15.60_1097.6301n	15.5993	1097.63	6.1247	NPRAGTITRL		A0A1D5T267	10946.9	8882.84	9657.82	6911.23	15207.8	12520.7	20985.8	12273.7	13312.2
16.06_1097.6271n	16.0587	1097.63	6.1247	NPRAGTITRL		A0A1D5T267	3411.51	2536.28	2972.01	4278.97	451.172	4370.84	581.885	1507.61	903.546
14.34_1623.7584n	14.3423	1623.76	7.1078	GQSQSVQGQSQSQKF	[11] Deamidation Q	A0A1D5T267	26307.9	27630.8	29130.2	21728.7	27116.3	32098.6	25438.3	22447.9	23540.7
58.91_1630.8863n	58.9129	1630.89	6.3533	RQGDVIALPAGIVHW		A0A1D5T267	23564.1	9664.67	20755.7	23951.8	33566	2186.39	47899	26462.5	58977.4
44.83_955.4961n	44.8255	955.496	6.7915	NDLLSPGQL		A0A1D5T267	25616.8	16247.2	14034.5	16100.5	17369.4	17815.8	21020.2	17219.8	20624.5
24.76_1413.7928n	24.7636	1413.79	---	AEALGTSGKIAQRL		A0A1D5T267	13829.8	5235.66	6549.76	5628.78	3856.1	6356.15	8391.65	6381.06	6330.57
26.92_2347.1531n	26.9197	2347.15	6.1307	LKPVFTQQREPESYPHTQY		A0A1D5T267	9398.67	4426.33	3745.97	193.97	4974.23	4857.48	14088.1	7715.05	9531.14
28.97_1922.9664n	28.9742	1922.97	5.7642	QNAIISPLWNINAHSVM	[17] Oxidation M	A0A1D5T267	5022.94	1249.79	2900.96	11089.6	19311.6	13897.1	10592.4	5715.93	9606.15
14.84_4865.0638n	14.8357	4865.06	6.3197	SQAKHSQGDQPEEGQGGQSQEEQSQAGPYPGCQPHAGQSHASQSTY	[32] Carbamidomethyl C	A0A1D5T266	4374.42	2013.49	2295.77	732.866	218.973	335.983	8990.41	3199.98	7829.69
28.66_1056.4115n	28.66	1056.41	6.7711	FDEENEQF		A0A1D5T267	7159.11	6171.1	4491.09	3975.62	1942.78	3669.86	2489.69	3594.15	2124.42
79.06_1633.7665n	79.0589	1633.77	6.1674	QSQNDDIIHVNHTL	[1] Deamidation Q	A0A1D5T267	94.3429	345.593	218.565	2324.86	1990.92	2013.12	3988.69	1551.45	2600.01
48.49_3030.5375n	48.4918	3030.54	5.9212	AEALGTSGKIAQRLQSQNDDIIHVNHTL	[12] Deamidation Q|[17] Deamidation Q	A0A1D5T267	44.2825	90.9229	50.7939	655.765	320.967	922.332	35.4529	52.5706	4.58247
48.59_3030.5234n	48.5933	3030.52	5.9212	AEALGTSGKIAQRLQSQNDDIIHVNHTL	[12] Deamidation Q|[17] Deamidation Q	A0A1D5T267	425.356	1572.49	764.271	9297.66	9923.61	9181.07	1142.81	830.788	889.074
62.63_2264.1194n	62.6297	2264.12	6.4545	MIQGHIWVQVVNDHGRNVF	[1] Oxidation M	A0A1D5T267	604.778	548.73	556.359	1754.77	901.414	3632.59	1472.67	892.924	610.577
47.07_956.4802n	47.066	956.48	5.901	NDLLSPGQL	[8] Deamidation Q	A0A1D5T267	348.518	80.6813	82.4867	554.923	118.094	292.618	0	142.115	57.147
73.19_1632.7869n	73.1863	1632.79	5.5433	QSQNDDIIHVNHTL		A0A1D5T267	678.005	414.271	337.744	2194.97	2095.13	1384.94	2000.43	951.874	1668.32
64.85_3714.6418n	64.853	3714.64	5.6436	TQQREPESYPHTQYEEGQSQAKHSQEEQPQM		A0A1D5T266	199.667	94.2677	281.78	1411.36	1188.66	525.34	136.316	251.312	230.123
43.22_1413.6647n	43.2247	1413.66	7.5898	IVVEGRDGYFEM		A0A1D5ZZT8	444531	422033	387611	499219	385266	451438	376889	363689	373916
29.01_1486.7912n	29.008	1486.79	7.7022	ADRVIRAQPESVF		A0A1D5YEH0	482389	416299	390728	466275	350632	385339	429268	410358	413811
45.61_1069.5780n	45.6061	1069.58	7.097	VAGNEGNLALL		A0A1D5ZZT8	264306	196628	166600	259351	235701	205595	260238	230550	231993
16.74_1533.7649n	16.7368	1533.76	6.9637	NTRQREDVDRVF		A0A1D5ZZT8	296236	309633	353350	292696	279381	331435	326507	314638	317910
25.41_1058.5519n	25.4089	1058.55	7.1621	AFPQQAREL		A0A1D5ZZT8	298066	241436	258924	320172	223861	269394	262507	253433	246151
61.98_1496.6952n	61.9844	1496.7	7.9593	SPIGFGGEQPQSFF		A0A1D5ZZT8	168037	111781	110264	193938	133974	345880	149707	144365	149188
39.92_917.5216n	39.9221	917.522	6.6737	VIPAGSIVY		A0A1D5ZZT8	203019	139173	130415	223004	149182	151870	182453	178305	183642
34.08_1153.5764n	34.0832	1153.58	6.8983	IVVEGRDGYF		A0A1D5ZZT8	166173	165692	151593	199634	135559	177699	153035	155474	154720
34.08_1153.5768n	34.0832	1153.58	6.8983	IVVEGRDGYF		A0A1D5ZZT8	5485.33	2415.26	1254.63	2289.56	2822	1356.2	2791.35	3747.73	3679.47
17.06_857.4482n	17.059	857.448	6.5229	VREGEGVL		A0A1D5YEH0	119783	160464	169975	92428.5	121372	133840	114378	116137	124696
17.06_857.4604n	17.059	857.46	6.5229	VREGEGVL		A0A1D5YEH0	17531.8	25646	26660	30490.2	13588.2	18311.3	16964.4	17562.4	19593.1
40.65_1504.6897n	40.6519	1504.69	7.2939	LQPSHYDADEIAF		A0A1D5ZZT8	162133	113366	119936	140920	195661	188416	172902	172082	178403
21.97_980.4478n	21.9655	980.448	6.8477	CVREGDVF	[1] Carbamidomethyl C	A0A1D5ZZT8	126543	99611.7	111954	138052	104736	119778	114473	104993	115482
17.72_1071.5915n	17.7214	1071.59	6.9462	KQLDDAAKAL		A0A1D5Z199	72923.6	84768.3	88033.3	55940.5	71758.6	62465.2	78947.4	78263.7	81136.1
47.39_1383.5985n	47.3901	1383.6	7.7619	SFGVGANNDEEVF		A0A1D5YEH0	142012	150264	130666	166821	100180	133695	80627.3	111781	91748.5
47.49_1383.5955n	47.4915	1383.6	7.7619	SFGVGANNDEEVF		A0A1D5YEH0	57461.8	30285.9	18238.9	50260.4	37930.7	29505.4	40566.1	52371.3	43308.4
11.02_1809.7590n	11.0172	1809.76	7.3833	QEGGDDEGRSGSGSGRPY		A0A1D5Z199	53386	56626	52728.7	32741.1	44211.8	56503	53663.5	56059.2	57143.5
40.72_779.3292n	40.7195	779.329	6.9722	DADEIAF		A0A1D5ZZT8	1239.52	1414.73	1164.49	674.14	1896.9	1140.23	685.244	753.736	881.826
40.79_779.3365n	40.7872	779.337	7.0055	DADEIAF		A0A1D5ZZT8	73667.3	44183	29084.7	72788.1	38472.7	34842.2	48365.9	50636.2	46825
64.85_1311.6371n	64.853	1311.64	7.5097	SVFSDEVIQAAF		A0A1D5Z199	45966.5	38391.5	36728.6	98380.7	74633.1	77608.3	96341.2	70671.6	78477.1
16.45_746.3720n	16.4475	746.372	7.188	DAAPRAF		A0A1D5YEH0	48240.8	50335.1	55716.3	78701.7	42265.9	62078.1	48416.4	46915.5	49944.6
18.82_1006.4979n	18.8233	1006.5	6.7161	IVVEGRDGY		A0A1D5ZZT8	74269.5	71141	79696.8	31102.3	55646.4	74760.1	58287.2	66681.3	60069.5
13.84_766.3533n	13.8351	766.353	6.7362	RGSIGDY		A0A1D5YEH0	6867.12	29735.2	28216.1	2831.64	12979.3	9298.07	23630.5	11353.7	9576.77
56.32_1182.6972n	56.3177	1182.7	7.0546	VREGEGVLVLL		A0A1D5YEH0	68436.1	41319.3	39394	83949.7	56213.9	61605.7	80564.3	66003.3	74513.9
56.79_1182.6963n	56.791	1182.7	7.0546	VREGEGVLVLL		A0A1D5YEH0	1430.95	333.68	169.902	0	0	185.44	0	0	0
46.80_1130.5841n	46.7955	1130.58	7.522	LLNPVSTPGSF		A0A1D5ZZT8	67792.5	66789.1	51424.4	72927.7	46487.8	62134.8	48259.1	53118.4	51335.4
46.80_1130.5972n	46.7955	1130.6	7.522	LLNPVSTPGSF		A0A1D5ZZT8	5776.38	2719.63	736.015	4389.53	2612.93	2602.19	3000.12	3310.51	3508.81
15.43_790.4679n	15.4303	790.468	6.5691	KVLERF		A0A1D5YEH0	15564.5	19205.9	18495.8	26281.6	11129.5	13294.6	16579.8	16132.5	15956.3
15.60_790.4692n	15.5993	790.469	6.5594	KVLERF		A0A1D5YEH0	574.606	868.314	870.232	0	142.16	882.526	432.032	408.837	247.508
45.61_938.4817n	45.6061	938.482	6.554	AKSRHGHF		A0A1D5YEH0	44385.8	37855.7	34844.4	56598.2	35287.6	43881.3	42680.3	39103.9	37173
27.82_1057.5192n	27.8186	1057.52	6.0797	ERFDHELL		A0A1D5YEH0	111911	94274.1	93951.6	115853	86782.9	80141.9	87562.6	83972.1	76847.2
44.59_1349.6275n	44.5888	1349.63	7.6858	SPIGFGGEQPQSF		A0A1D5ZZT8	70461	58605.1	57127	67583.8	52361.4	70071.1	79384	75529.1	75626.3
38.70_1069.6132n	38.6991	1069.61	7.1248	VREGEGVLVL		A0A1D5YEH0	30822	12181	8204	12659.4	22085.5	11527.9	29293.3	28746.8	31466.7
41.33_995.4398n	41.3282	995.44	7.4392	GGEQPQSFF		A0A1D5ZZT8	25424.4	27072	22785.7	36973.3	25381.9	26002.3	24790	24331.3	24395.8
41.38_995.4359n	41.3818	995.436	7.4392	GGEQPQSFF		A0A1D5ZZT8	22785.3	10494	7620.32	17254.1	15273.7	9680.13	15935.5	18309.8	17653.2
60.10_2110.9852n	60.1021	2110.99	7.3038	SFGVGANNDEEVFVTGGNSVL		A0A1D5YEH0	4517.24	4114.53	4135.46	38781.1	48189.6	60896.6	60960.1	24431.8	43927.5
28.48_1163.4789n	28.4811	1163.48	5.6735	EMACPHVSSF	[4] Carbamidomethyl C	A0A1D5Z199	379.714	48.1979	0	0	0	0	105.553	77.9615	12.1363
28.51_1163.4813n	28.5149	1163.48	5.6735	EMACPHVSSF	[4] Carbamidomethyl C	A0A1D5Z199	18021.9	15351.9	15087.3	18858.3	10431.8	16165.3	11827.6	13541.8	12535.1
61.34_1742.8895n	61.3391	1742.89	5.7772	DDAAKALAFPQQAREL		A0A1D5Z199	20663.3	11602.4	14406.1	54893.3	36698.8	47351.3	60774.5	29785.7	46996.3
23.13_2384.2039n	23.1348	2384.2	7.5312	QRKSRGEGPISEGSEEQIREL		A0A1D5Z199	27929.9	13448	14536.8	32402.2	14014.2	13793.4	21914.8	15810.9	20343.3
16.96_1454.7404n	16.9576	1454.74	5.7458	VAGPQQQRRVADM		A0A1D5YEH0	11915.9	21702.5	22879.3	12267	9393.62	12360.1	7700.31	11154.7	10217.4
22.07_1454.7499n	22.0669	1454.75	6.1125	VAGPQQQRRVADM		A0A1D5YEH0	1018.64	903.901	488.995	483.605	701.031	1610.42	377.157	282.158	307.471
35.78_1322.5698n	35.7798	1322.57	7.3648	HFGEESFREW		A0A1D5ZZT8	5892.72	1786.26	4490.06	11817.1	12487.9	13976.7	12112.9	5006.44	11654.3
31.50_1149.4927n	31.5021	1149.49	6.0641	GVGANNDEEVF		A0A1D5YEH0	5647.19	4479.03	2825.58	5812.76	4769.5	2160.97	2729.96	4547.03	3366.62
37.48_772.3770n	37.4761	772.377	5.592	VAGNEGNL		A0A1D5ZZT8	6615.17	10505.1	10853.2	6187.15	6283.65	5965.27	7734.65	10590.4	9405.34
16.86_2672.3468n	16.8561	2672.35	6.0272	QRKSRGEGPISEGSEEQIRELSSL	[1] Deamidation Q	A0A1D5Z199	4816.34	3131.35	3311.51	247.926	8520.7	8275.43	948.317	893.986	1070.9
62.97_876.4544n	62.9678	876.454	5.8688	VNITRGSM		A0A1D5YEH0	6887.42	5525.73	5338.45	4170.8	3091.89	2341.71	3775.96	4448.58	3873.17
50.15_2643.0761n	50.1544	2643.08	5.7672	QEGGDDEGRSGSGSGRPYHFGEESF		A0A1D5Z199	2016.86	1635.57	1235.27	610.607	369.832	1200.42	978.772	962.48	793.08
65.38_4860.4168n	65.3799	4860.42	5.9953	SDEVIQAAFNTRQREDVDRVFQRKSRGEGPISEGSEEQIREL		A0A1D5Z199	32.9133	46.6674	130.376	4131.66	1797.55	2408.89	12.0909	11.6243	70.3589
49.65_1421.6844n	49.6472	1421.68	6.4028	LNPVSTPGSFQEF		A0A1D5ZZT8	736.05	40.9598	24.4012	280.67	88.4894	147.402	0	27.7139	0
13.00_2733.3002n	13.0038	2733.3	6.382	SRSCSRGGRGGGGGSGSEKEDIQPRSL	[4] Carbamidomethyl C	A0A1D5ZZT8	677.653	596.273	1151.48	3.1477	0	0	0	0	0
42.52_1289.6676n	42.5174	1289.67	8.3114	SIILQEQQQGF		Q8W3V5	725714	855263	831658	895451	998489	820381	687223	792472	727142
25.77_809.3939n	25.767	809.394	7.6487	SIGTGVGGY		Q00M61	236102	219297	271453	265354	257100	234515	211852	249144	213183
14.63_1200.5425n	14.6328	1200.54	8.0346	LQQQCSHVAM	[5] Carbamidomethyl C	Q00M61	275090	377768	407189	168246	390732	354492	314669	363262	350695
39.94_1421.7340n	39.9446	1421.73	7.5694	LQPHQISQLEVM		Q00M61	411509	511050	490739	428214	548520	453135	413010	545370	463128
49.36_882.4170n	49.3569	882.417	7.364	SSTTIMPF		Q00M61	187470	181095	199051	186746	242969	229902	191882	214804	191905
48.03_1456.7510n	48.0325	1456.75	6.9243	RTLPTMCGVNVPL	[7] Carbamidomethyl C	Q00M61	220552	280509	230034	253393	288232	261674	219606	235874	213086
50.64_1619.8162n	50.6363	1619.82	7.7015	RTLPTMCGVNVPLY	[7] Carbamidomethyl C	Q00M61	298726	278680	258076	347141	534541	330857	374684	409889	376963
57.17_1943.0874n	57.1658	1943.09	8.2548	SQQQQPVLPQQQPVIIL		Q00M61	349632	407392	441399	453013	427785	325851	335916	439388	395391
19.81_740.3825n	19.8096	740.382	5.8555	QQPQQL		Q00M61	166155	194189	217298	72290.8	169623	181718	132815	135277	128280
24.56_857.4633n	24.5607	857.463	5.8865	ETSRVPGL		Q00M61	141106	137715	146356	174085	114528	144923	133572	122740	128597
44.40_1290.6475n	44.4029	1290.65	7.9699	SIILQEQQQGF	[8] Deamidation Q	Q8W3V5	189273	211894	268151	307434	285889	281786	220593	233373	221564
24.24_3791.7441n	24.2395	3791.74	7.9297	VQPQQQQPQQSGQGVSQHQQQSQQQQQLGQCSF	[31] Carbamidomethyl C	Q00M61	110398	86442.2	109476	120573	192237	161360	120112	154790	151243
18.48_1321.5603n	18.485	1321.56	7.0776	GQCSFQQPQQL	[3] Carbamidomethyl C|[9] Deamidation Q|[10] Deamidation Q	Q00M61	165031	185907	247284	49156.1	55898.6	65754.7	167639	197408	194475
53.77_1045.4796n	53.77	1045.48	7.3179	YSSTTIMPF		Q00M61	63061.6	71971.9	71594.8	59778.4	63125.2	56227.7	62358.2	72114.6	65409.3
52.11_4136.0275n	52.1072	4136.03	5.9376	QQQPLPPQQQPPCSQQQQPFPQQQQPIIILQQSPF	[1] Deamidation Q|[8] Deamidation Q|[13] Carbamidomethyl C	Q00M61	136831	137886	169019	140239	84588.6	90032.2	90737.4	129672	132809
24.76_3792.7312n	24.7636	3792.73	7.6315	VQPQQQQPQQSGQGVSQHQQQSQQQQQLGQCSF	[9] Deamidation Q|[31] Carbamidomethyl C	Q00M61	44098.9	37062	63105.5	65313.1	111411	103701	66560.7	70895.4	72162.7
24.76_3792.7280n	24.7636	3792.73	7.6315	VQPQQQQPQQSGQGVSQHQQQSQQQQQLGQCSF	[9] Deamidation Q|[31] Carbamidomethyl C	Q00M61	13231.1	5063.34	9896.99	16335.2	31887.3	17267.3	14048.2	15651.3	15990.9
25.39_3792.7256n	25.392	3792.73	6.6753	VQPQQQQPQQSGQGVSQHQQQSQQQQQLGQCSF	[25] Deamidation Q|[31] Carbamidomethyl C	Q00M61	6633.5	2168.95	5183.6	10108.6	17639.9	8755.01	7277.64	7345.07	9204.48
25.43_3792.7265n	25.4258	3792.73	6.6753	VQPQQQQPQQSGQGVSQHQQQSQQQQQLGQCSF	[25] Deamidation Q|[31] Carbamidomethyl C	Q00M61	26213.3	23605.4	46298.4	40368.1	72033.6	60430.6	44577.1	41090.9	48217.8
45.05_1595.7959n	45.0453	1595.8	7.1215	GQQPQQQQIPQGIF		Q00M61	53492.8	54597.9	56835.2	53618.3	57715.8	57081.8	54904.9	71100.5	69660.2
66.94_1595.7971n	66.9412	1595.8	5.883	GQQPQQQQIPQGIF		Q00M61	51014.1	42456.7	44209.3	71206.6	99232.8	63434.4	89895.5	75433.8	79482.5
14.92_3212.5310n	14.9202	3212.53	7.5718	VQPQQQQPQQSGQGVSQHQQQSQQQQQL		Q00M61	60402.9	89628.4	101046	30624.5	71941.2	91062.7	53389	84139.4	74366
59.91_1944.0644n	59.9132	1944.06	7.4541	SQQQQPVLPQQQPVIIL	[10] Deamidation Q	Q00M61	32413.7	34503.6	47687.3	62319	49299.5	49030.9	37581.4	40950.7	40460.8
64.75_4134.0602n	64.7515	4134.06	7.1808	QQQPLPPQQQPPCSQQQQPFPQQQQPIIILQQSPF	[13] Carbamidomethyl C	Q00M61	68718.9	52735.1	68309.1	126707	269964	133187	206894	133786	170653
53.11_4137.0084n	53.1077	4137.01	6.6277	QQQPLPPQQQPPCSQQQQPFPQQQQPIIILQQSPF	[8] Deamidation Q|[9] Deamidation Q|[13] Carbamidomethyl C|[15] Deamidation Q	Q00M61	94183.1	90742.1	135483	134566	67375.6	72080.6	71665.1	86906.7	98675.7
12.05_3330.5988n	12.0514	3330.6	6.438	SQQQQQQQQQQPPFSQQQQPVLPQQPPF	[24] Deamidation Q	Q00M61	9030.96	12649.9	12480.6	16992.7	14788.3	7390.12	11818.4	12320.8	13712.4
15.57_3213.5139n	15.5655	3213.51	7.2521	VQPQQQQPQQSGQGVSQHQQQSQQQQQL	[10] Deamidation Q	Q00M61	45130.8	69489.3	105903	57308.6	74848.8	83010.1	45267.3	58213.7	55995.3
39.70_3546.7570n	39.6994	3546.76	6.1977	QQQPLPPQQQPPCSQQQQPFPQQQQPIIIL	[13] Carbamidomethyl C	Q00M61	28639.7	27099.4	28724.9	39780.5	40358	24899.8	40907.4	39343	43884.4
59.08_3546.7922n	59.082	3546.79	6.6567	QQQPLPPQQQPPCSQQQQPFPQQQQPIIIL	[13] Carbamidomethyl C	Q00M61	51144.7	60220.8	63590.9	62260.3	62373.6	18971.4	47191.4	66143.4	57356.2
48.39_1965.0048n	48.3904	1965	7.1808	QQLGQQPQQQQIPQGIF		Q00M61	96609.2	111199	91469.6	89442.1	102588	105539	84569.4	118034	96384.5
46.07_3029.4824n	46.0654	3029.48	7.4494	QQQCCQQLPQIPEQSRSEAIRAIVY	[4] Carbamidomethyl C|[5] Carbamidomethyl C	Q00M61	18495.9	10971.7	12497.9	22083.9	55715.6	26802.4	42818	35777.1	41298.1
49.59_1965.9839n	49.5866	1965.98	7.1003	QQLGQQPQQQQIPQGIF	[6] Deamidation Q	Q00M61	37050.6	45149.8	45421.2	46349.7	43557.5	52191.6	48563.2	51828.6	45264.7
56.66_1726.8278n	56.6558	1726.83	6.1225	SQQQQQQQQQQPPF		Q00M61	7489.4	7301.47	6833.54	9511.06	9659.41	10787.6	11247.1	8242.59	7359.22
52.94_2687.3692n	52.9387	2687.37	6.9735	QQPQQLQQLGQQPQQQQIPQGIF		Q00M61	10458	7066.87	8106.94	10711.1	21771.5	15994.7	16645.5	14959.8	16843.7
52.94_2687.3771n	52.9387	2687.38	6.9735	QQPQQLQQLGQQPQQQQIPQGIF		Q00M61	556.947	48.8874	57.8304	369.327	6315.27	1493.45	3337.04	2601.38	3318.01
51.97_3130.5825n	51.972	3130.58	6.2876	QQSPFSQQQQPVLPQQQPVIILQQPPF	[15] Deamidation Q|[16] Deamidation Q|[23] Deamidation Q	Q00M61	16769.6	18717.7	19364.3	20686.9	14601	22054.2	25184.3	30328.2	31145.9
52.74_3792.8777n	52.7358	3792.88	6.9633	SQQQQPSSQQPPFPQQHQQFPQQQIPVVQPSVL		Q00M61	27020.5	38898.4	42348.8	22131.6	23274.1	17560.1	22767.8	26523.1	22705.8
48.26_1162.4573n	48.2552	1162.46	6.048	WQQSSCHVM	[3] Deamidation Q|[6] Carbamidomethyl C	Q8W3V5	6115.71	6023.07	5862.75	9584.62	7620.2	8233.74	5234.78	5157.49	5274.95
65.35_2540.3686n	65.3461	2540.37	6.5387	SQQQQPVLPQQQPVIILQQPPF		Q00M61	6943.36	8159.75	9085.65	7827.47	8646.6	6104.11	7253.97	8077.45	8517.79
58.12_615.2986n	58.1154	615.299	6.211	QQPPF		B2Y2S6	5664.79	5511.59	5839.31	6606.79	4039.18	4367.37	3347.06	3487.2	3142.32
28.50_3927.8583n	28.498	3927.86	6.292	QQPPFSQQQQPVLPQQPPFSQQQQQQQQQQPPF	[29] Deamidation Q	Q00M61	8756.13	8862.21	8402.18	2654.64	3984.99	5072.51	0	0	26.7711
25.09_1062.5792n	25.0877	1062.58	6.451	LQPHQISQL		Q00M61	2063.08	2949.03	3498.1	1084.64	886.513	1586.41	418.06	1017.2	660.304
14.67_1087.4561n	14.6666	1087.46	6.4805	QQQCSHVAM	[4] Carbamidomethyl C	Q00M61	653.811	910.208	1157.79	388.824	741.004	808.426	371.822	873.162	571.634
[truncated: 1,553 more rows]
